# Supplementary material for: Identification of active compounds in Ophiopogonis Radix from different geographical origins by UPLC-Q/TOF-MS combined with GC-MS approaches
Source: PubMed Central journal article supplement (PMC9375982; doi:10.1515/biol-2022-0096), 2022-08-12
Supplement: biol-2022-0096-sm.pdf [file biol-2022-0096-sm.pdf]

**Table S1 MS fragmentation pathways for representative compounds of CMD in UPLC-Q/TOF-MS analysis**

MS fragmentation pathways for different chemical constituents of CMD in positive ion mode

**精氨酸L(+)-Arginine**

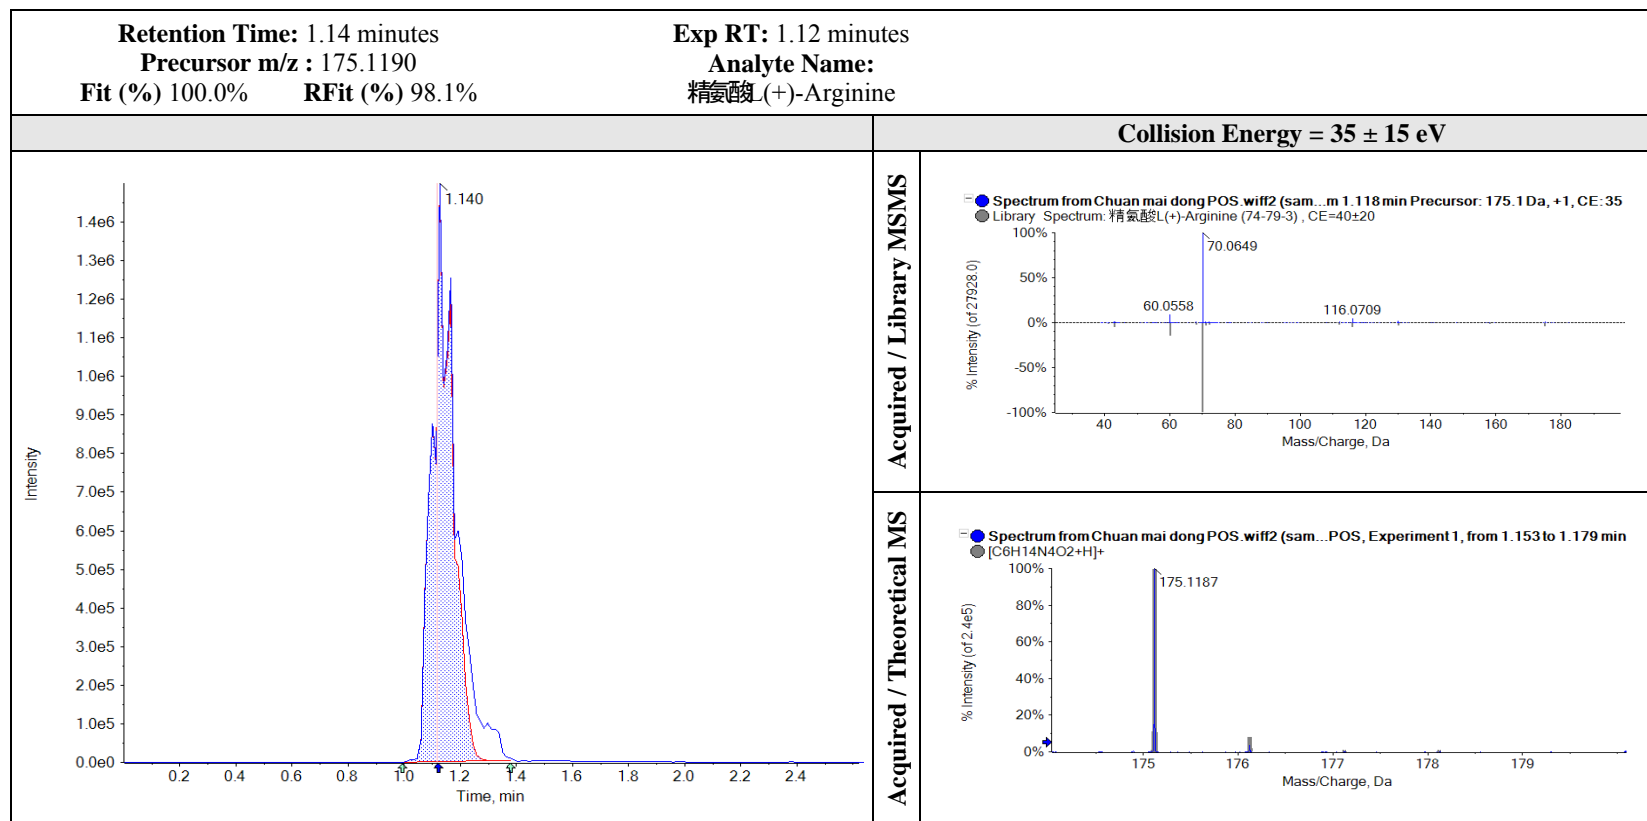

### 胡芦巴碱 Trigonelline

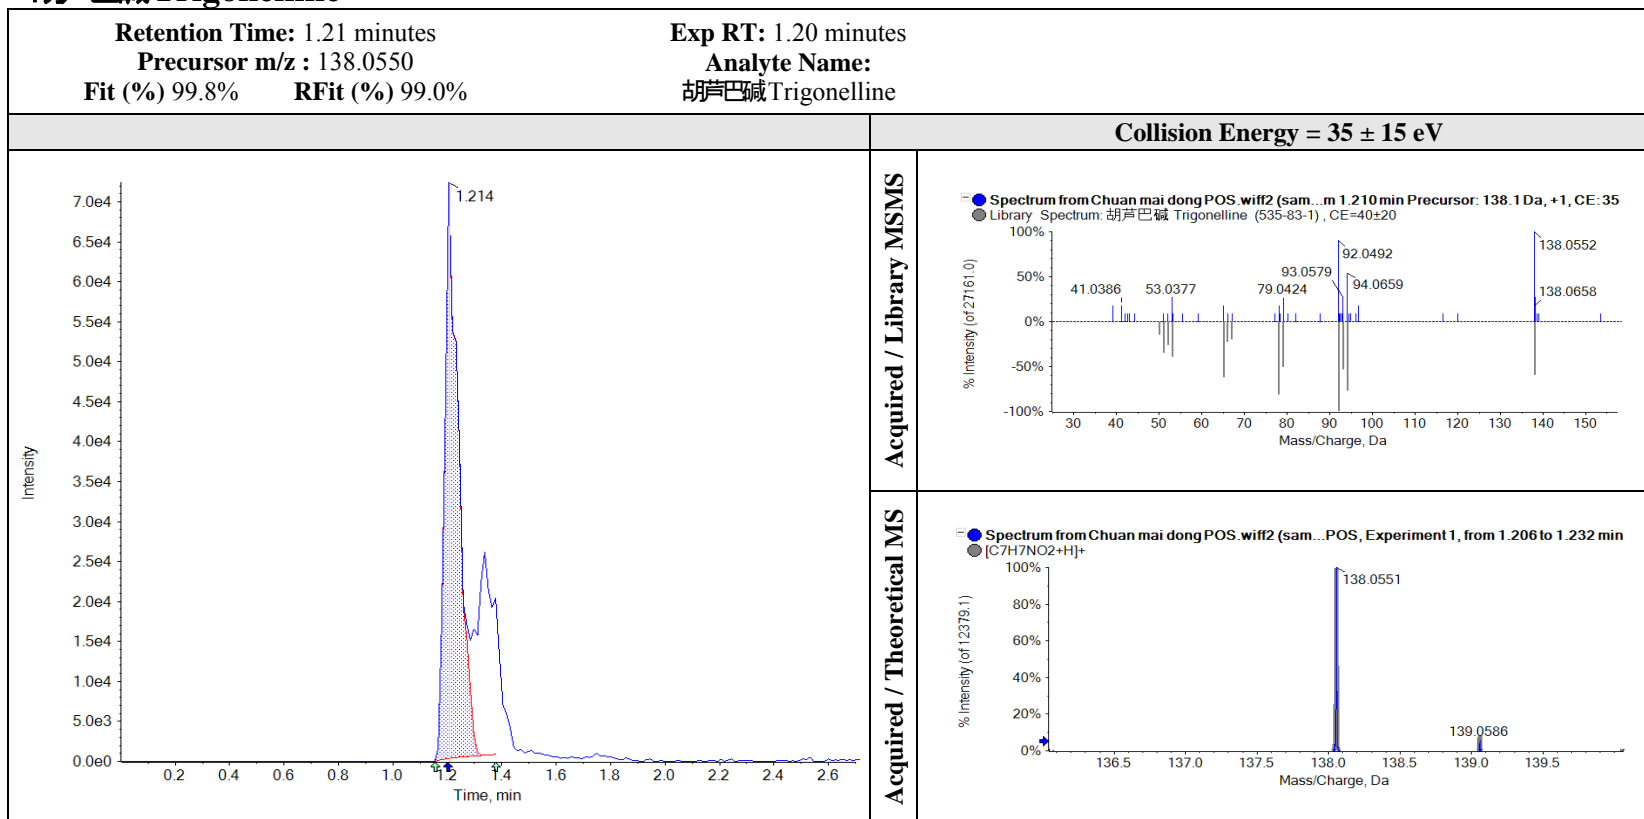

### 脯氨酸 Proline

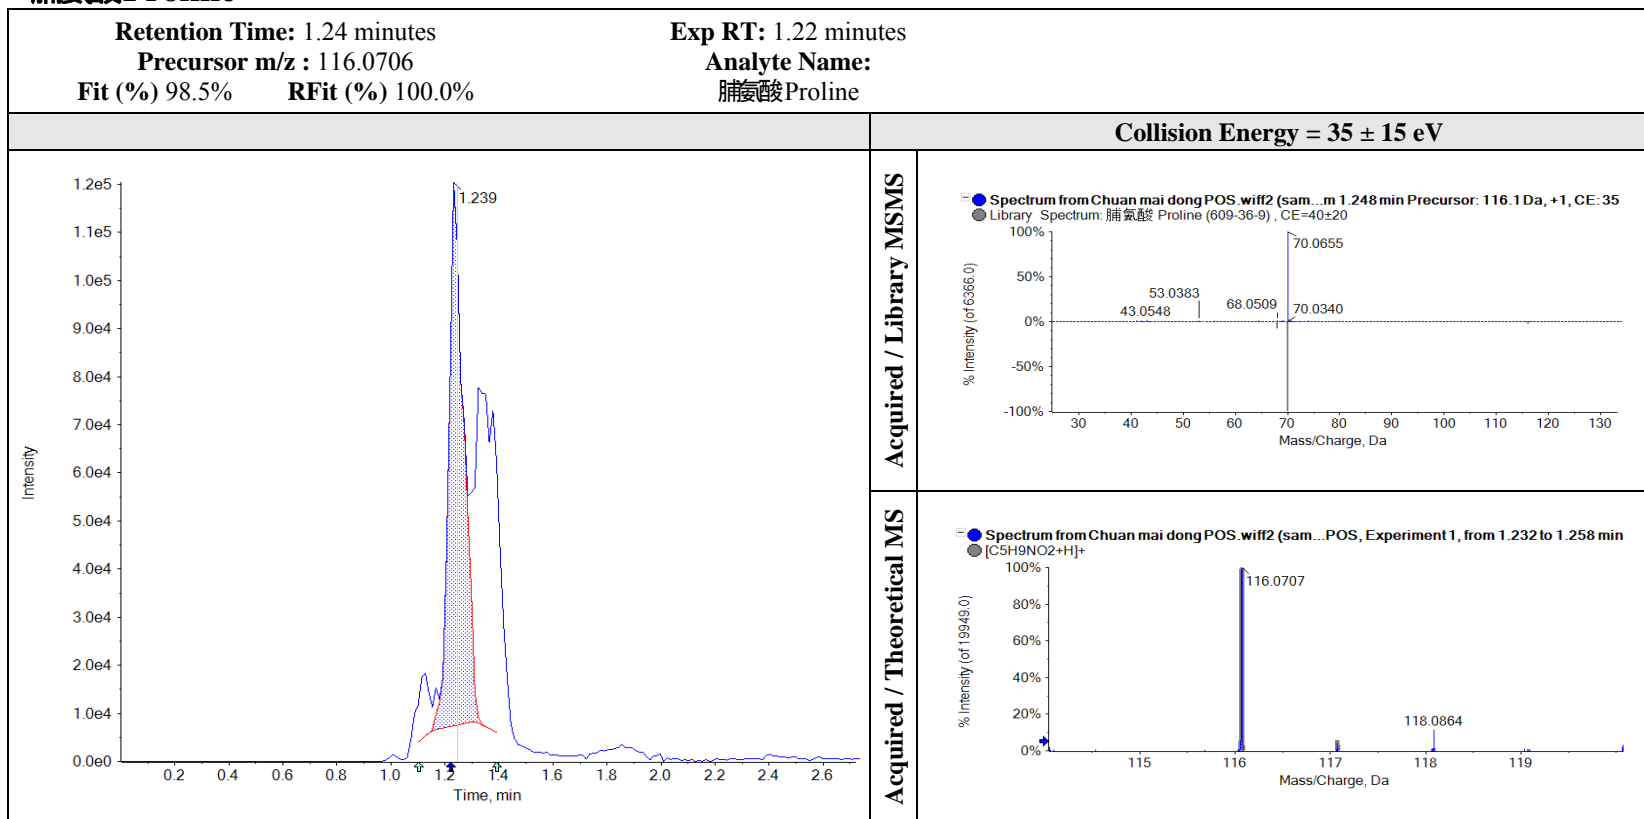

### 谷氨酸 Glutamic acid

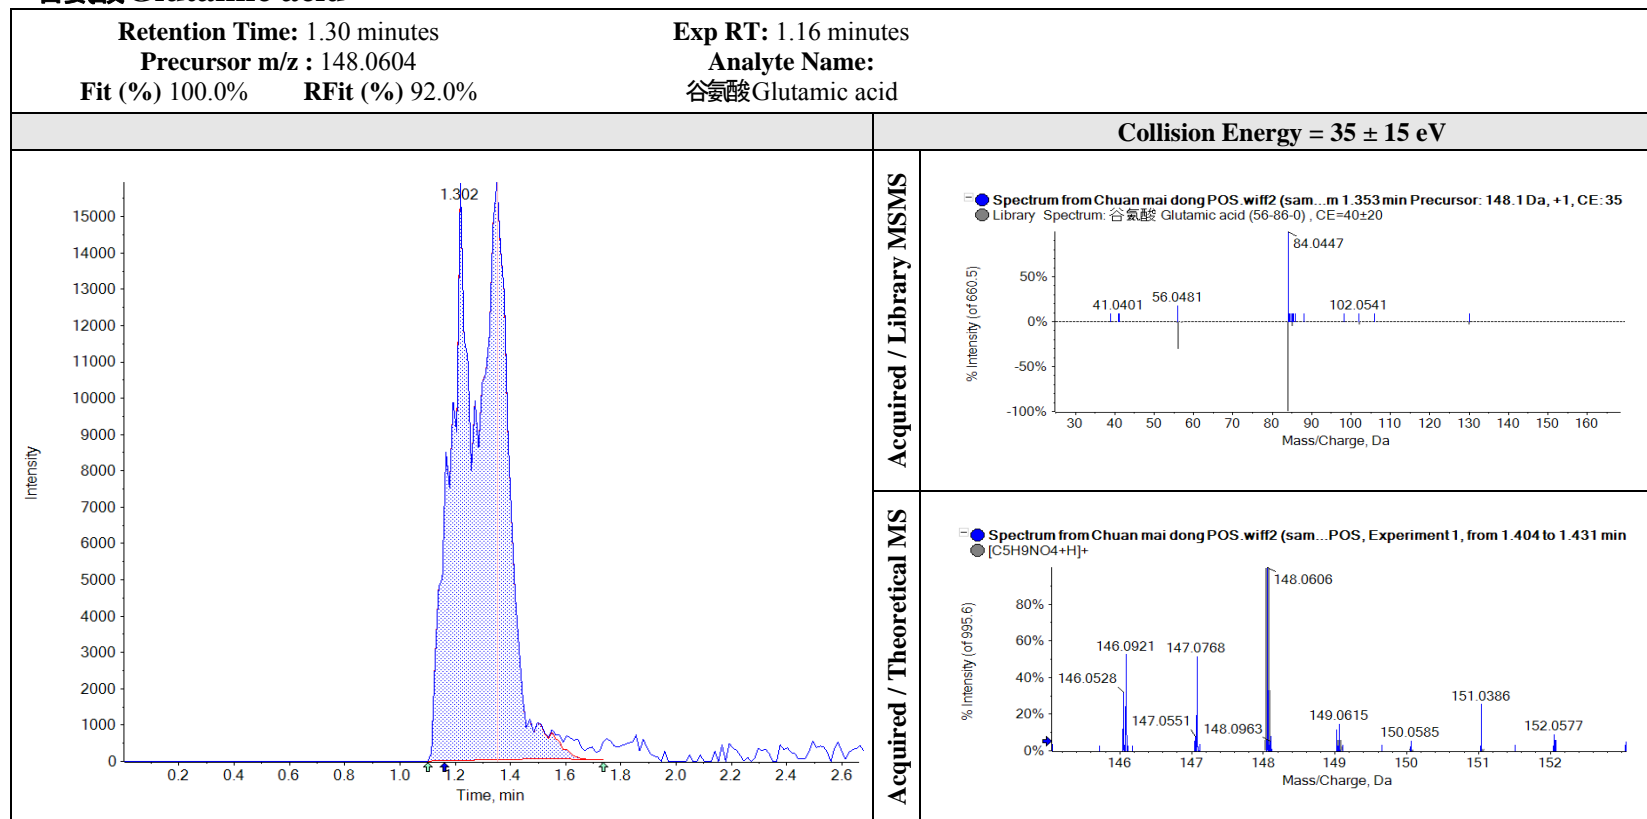

### 甜菜碱 Betaine

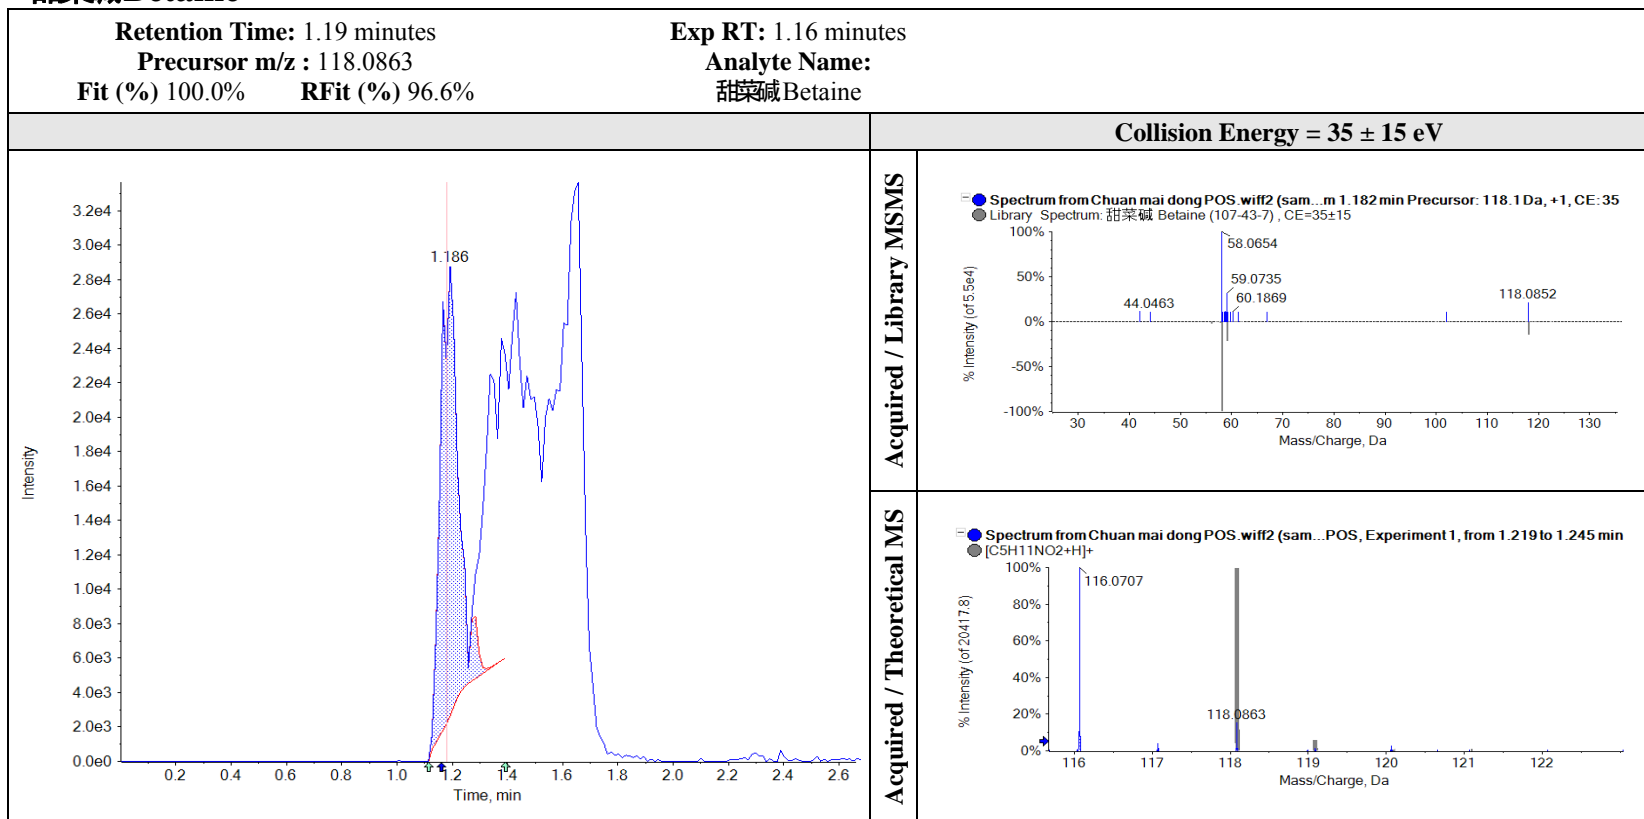

**烟酸 Nicotinic acid**

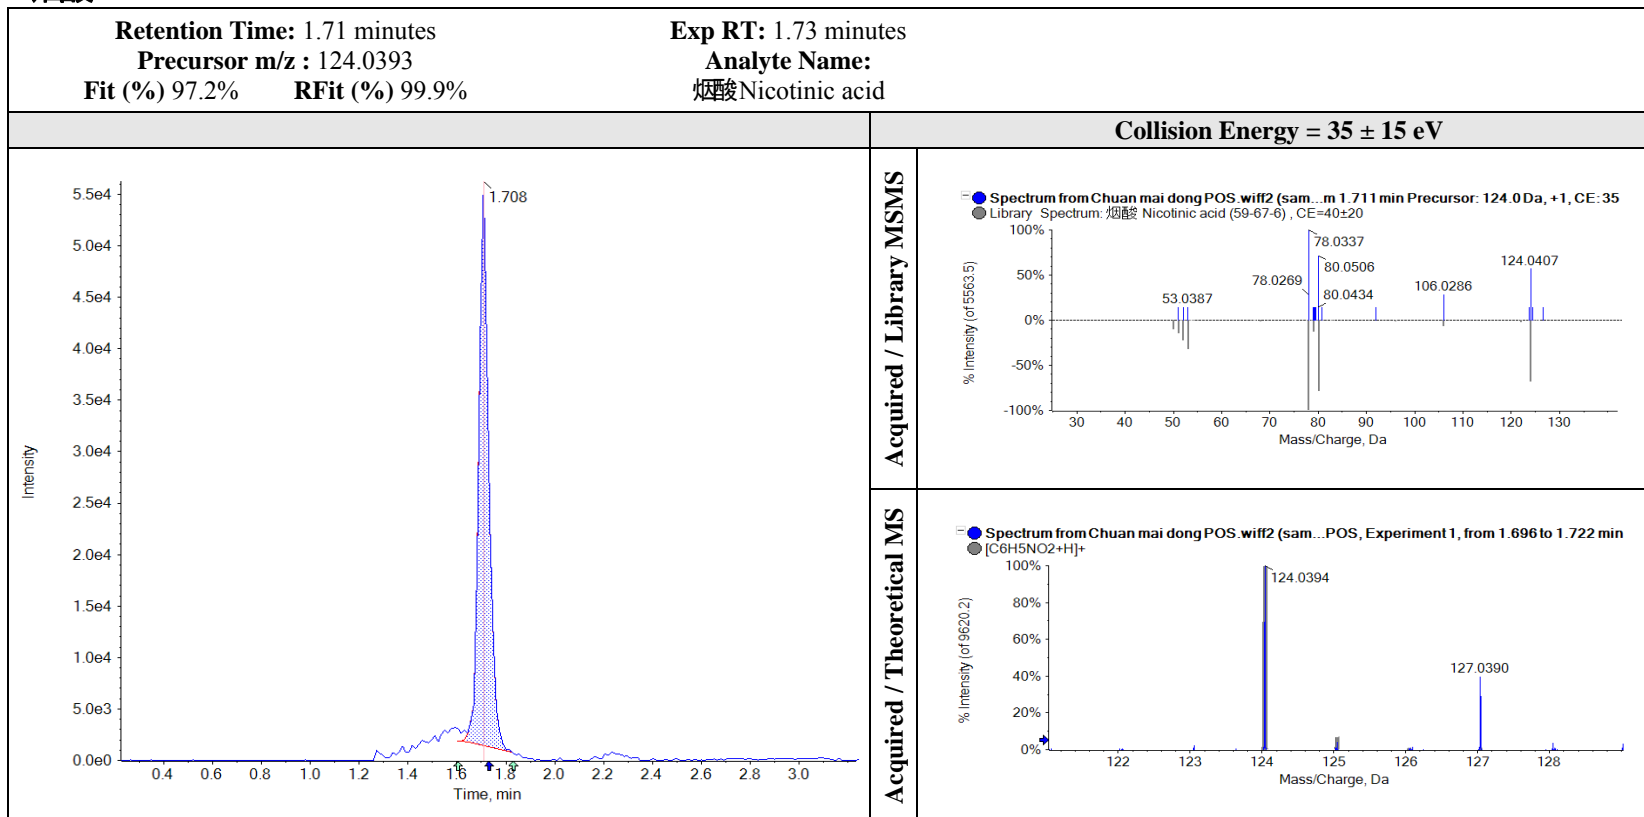

### 烟酰胺 Nicotinamide

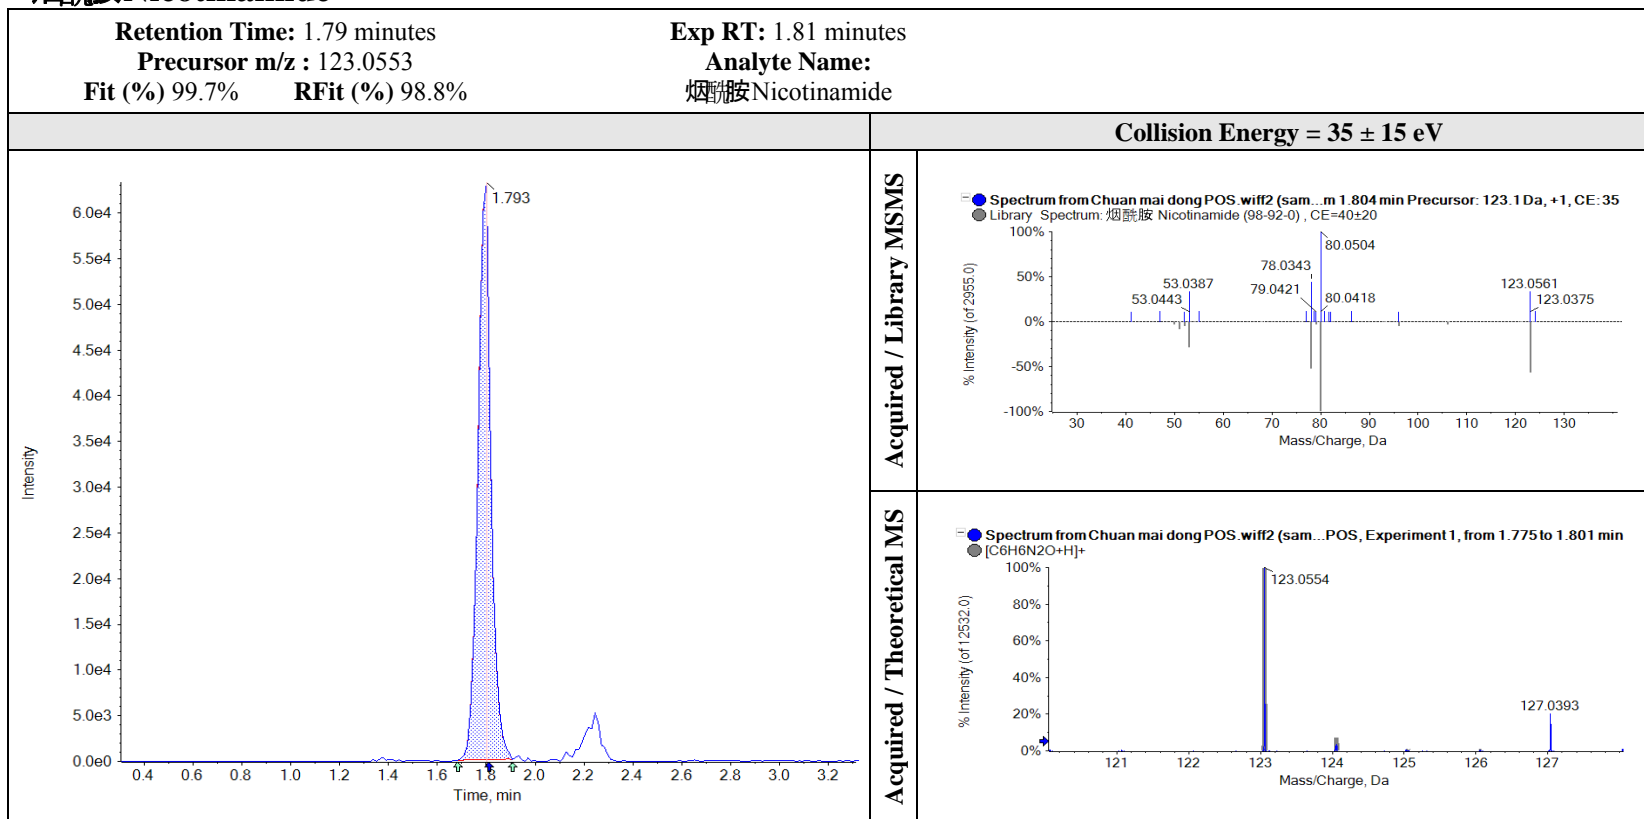

### 腺苷 Adenosine

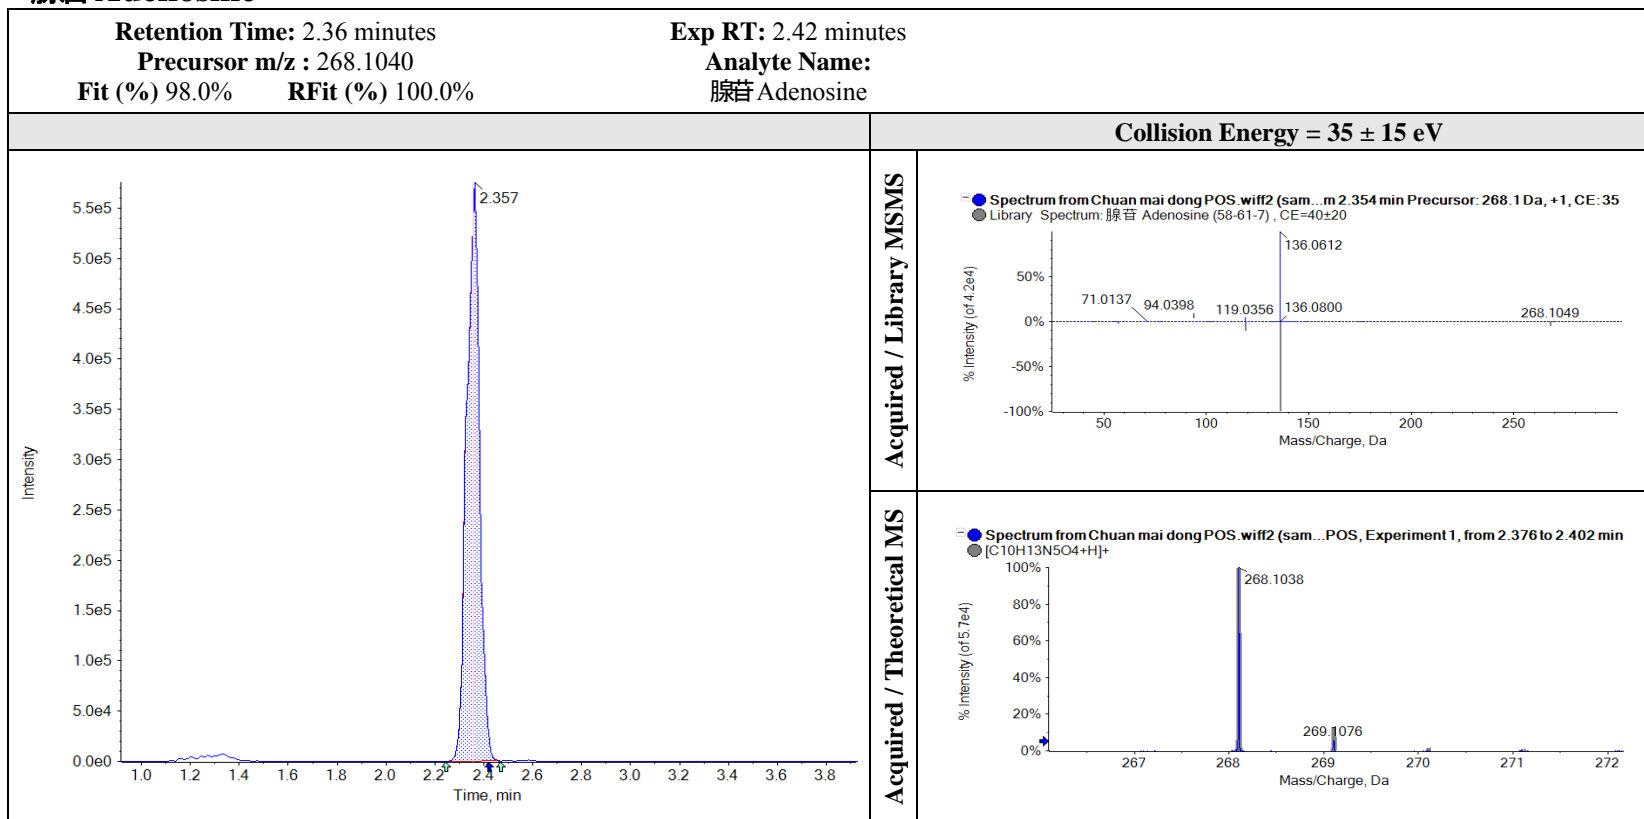



### 虫草素 Cordycepin

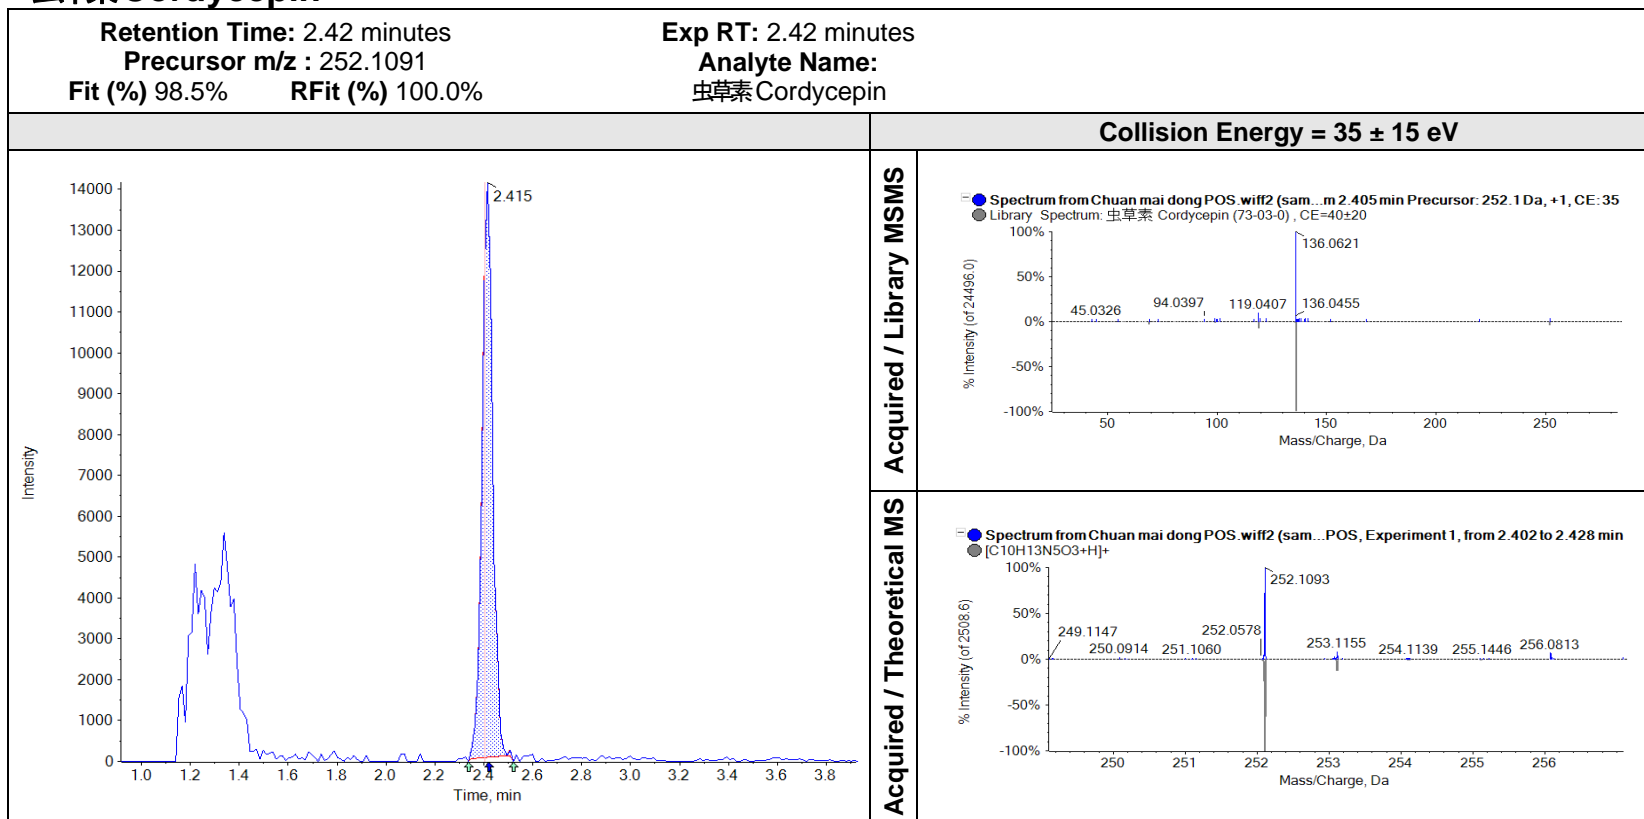

### 鸟苷 Guanosine

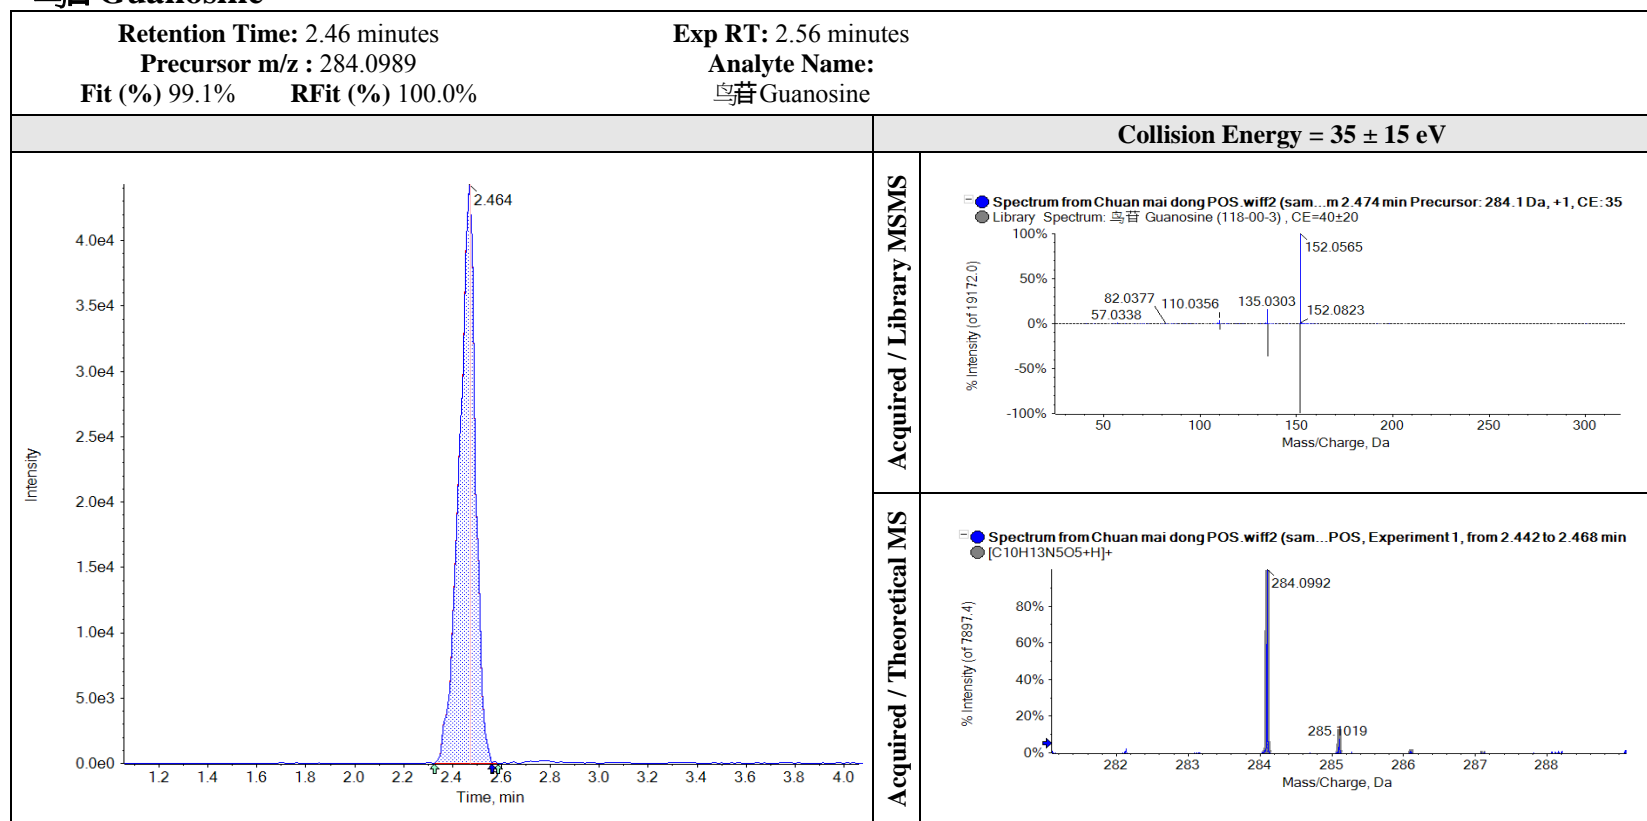

**苯丙氨酸 Phenprobamate**

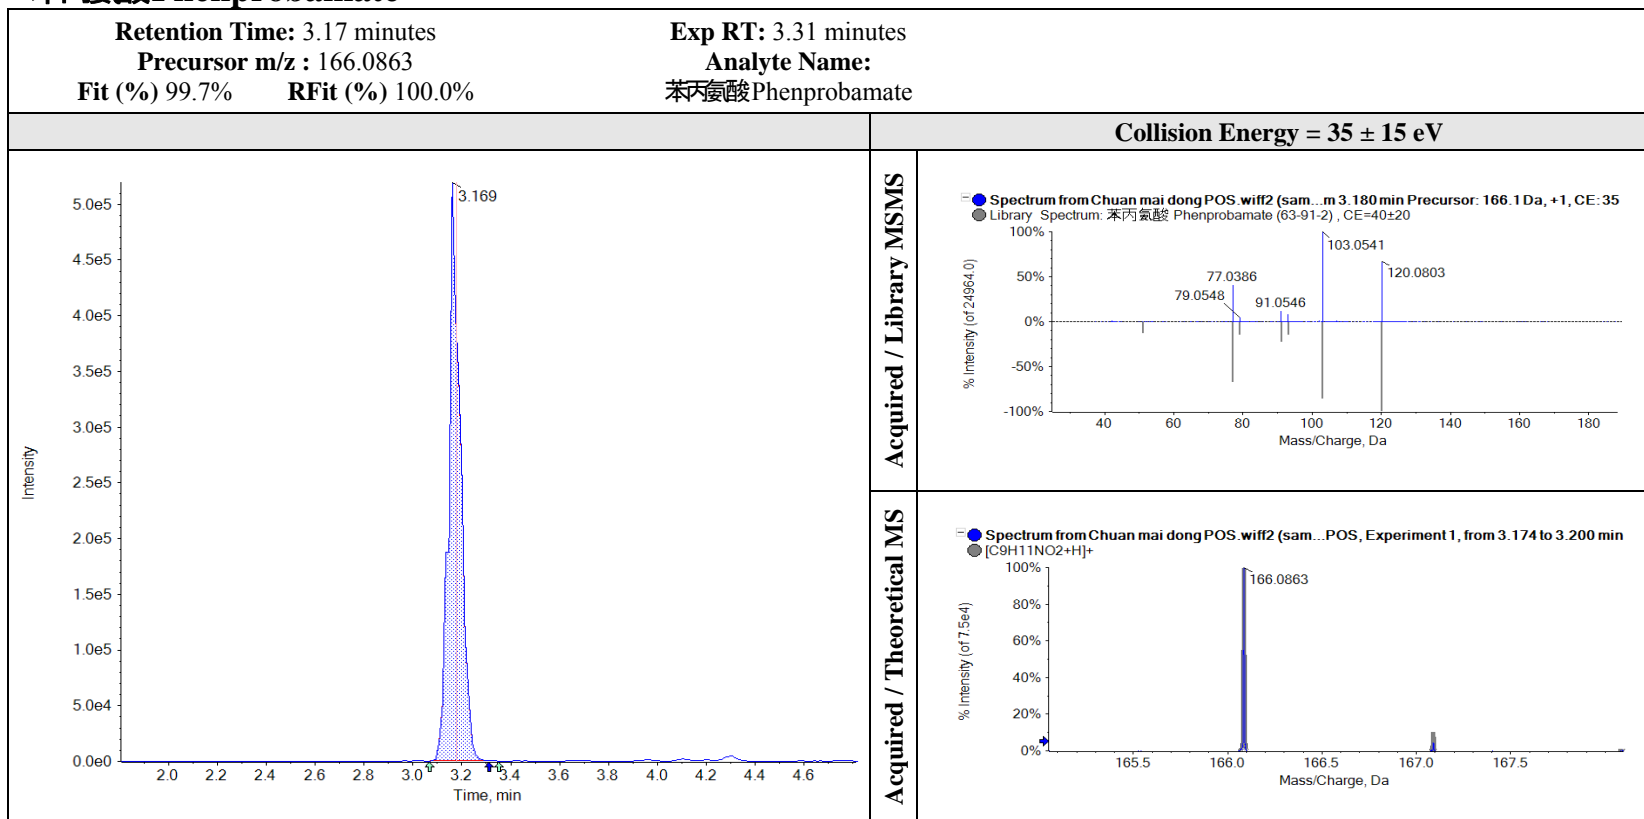

**肉桂酸 Cinnamic acid**

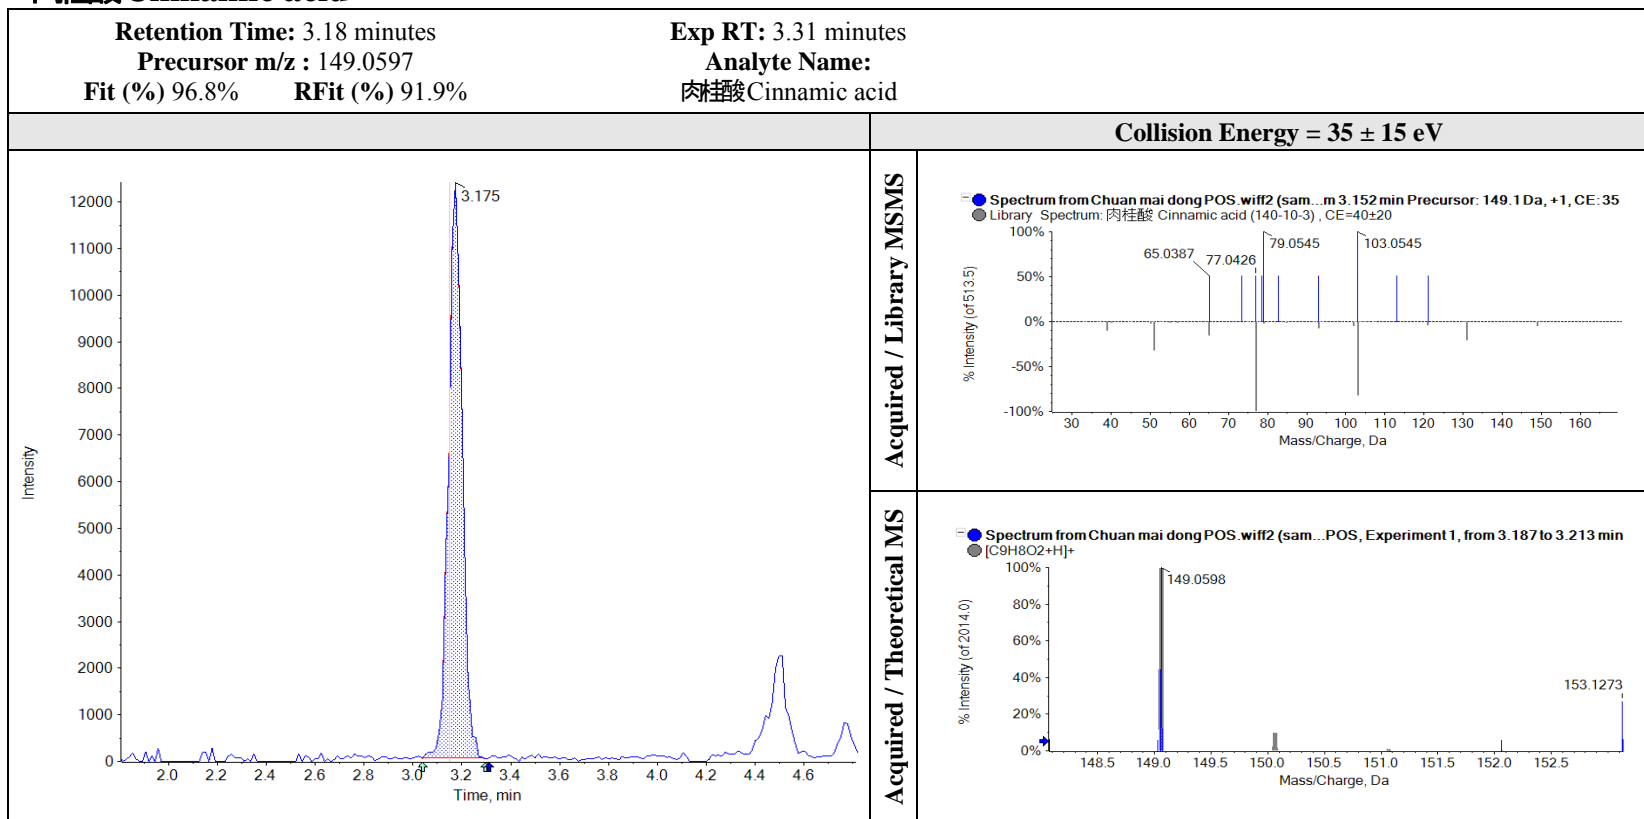

**对羟基苯甲酸 4-Hydroxybenzoic acid**

|                                                                                                                                                                                                                                       |                                         |
|---------------------------------------------------------------------------------------------------------------------------------------------------------------------------------------------------------------------------------------|-----------------------------------------|
| <p><b>Retention Time:</b> 4.73 minutes      <b>Exp RT:</b> 4.81 minutes</p> <p><b>Precursor m/z :</b> 139.0390      <b>Analyte Name:</b></p> <p><b>Fit (%)</b> 76.9%      <b>RFit (%)</b> 98.6%      对羟基苯甲酸 4-Hydroxybenzoic acid</p> |                                         |
| <p><b>Collision Energy = 35 ± 15 eV</b></p>                                                                                                                                                                                           |                                         |
|                                                                                                                                                                                                                                       | <p><b>Acquired / Library MSMS</b></p>   |
|                                                                                                                                                                                                                                       |                                         |
|                                                                                                                                                                                                                                       | <p><b>Acquired / Theoretical MS</b></p> |
|                                                                                                                                                                                                                                       |                                         |

### 秦皮乙素 Esculetin

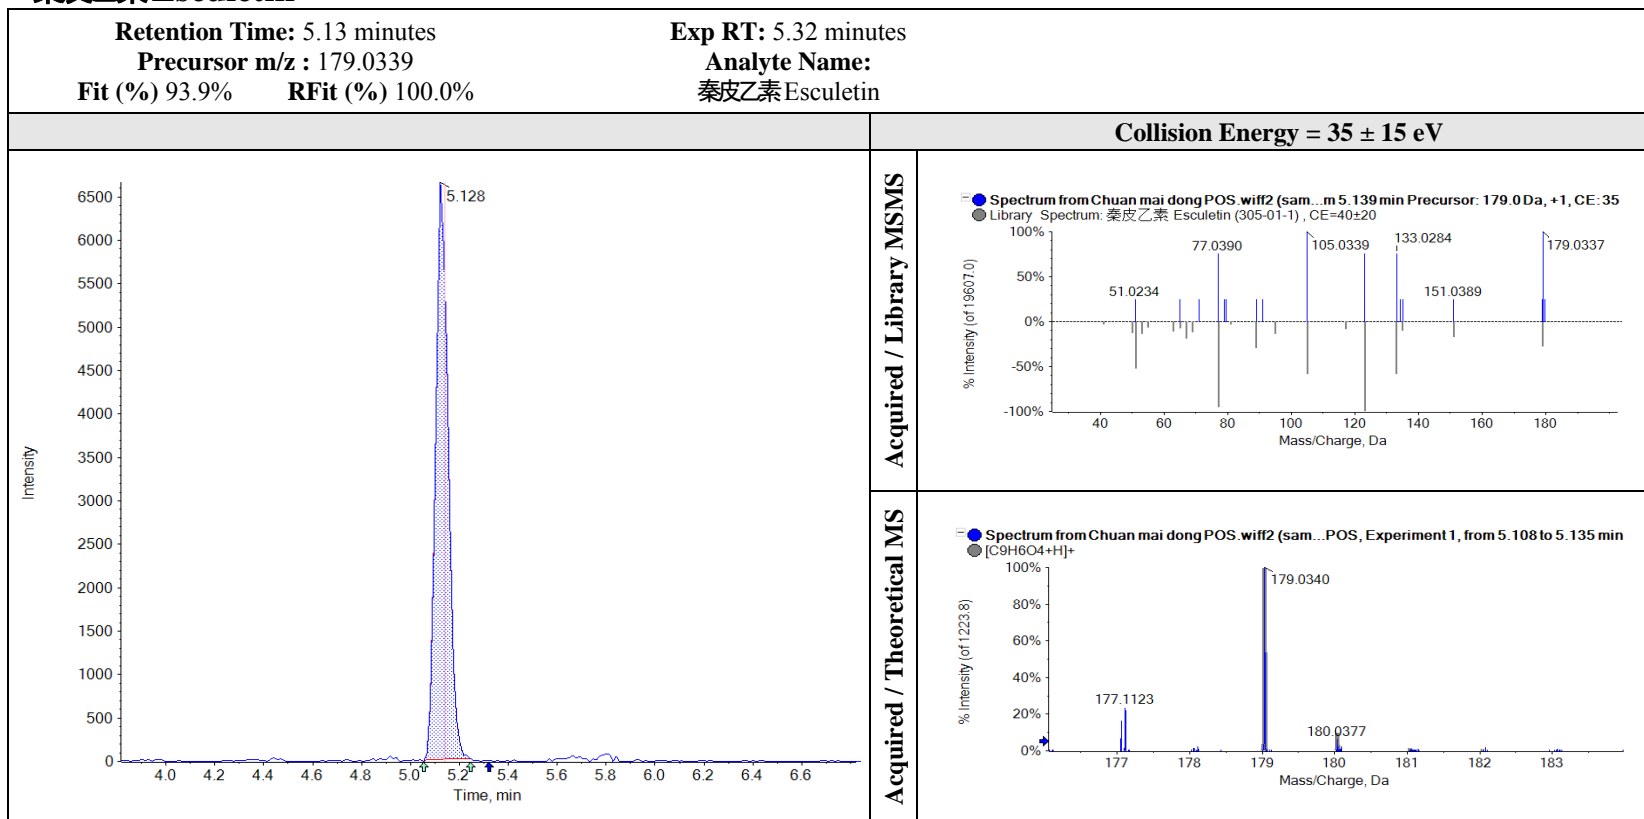

### 金丝桃苷 Hyperin

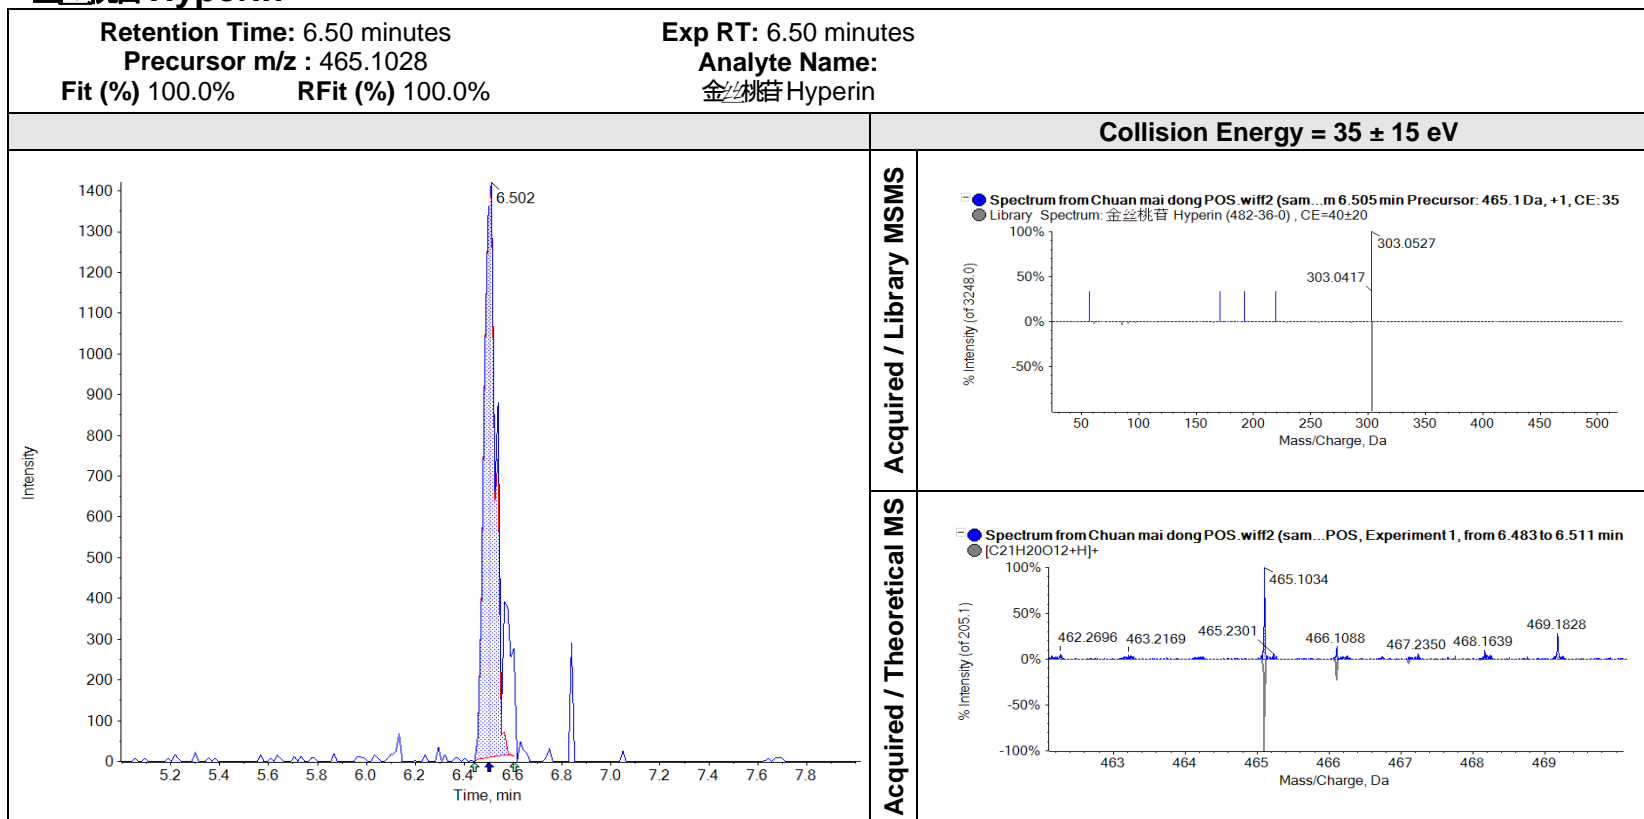

### 丁香醛 Syringaldehyde

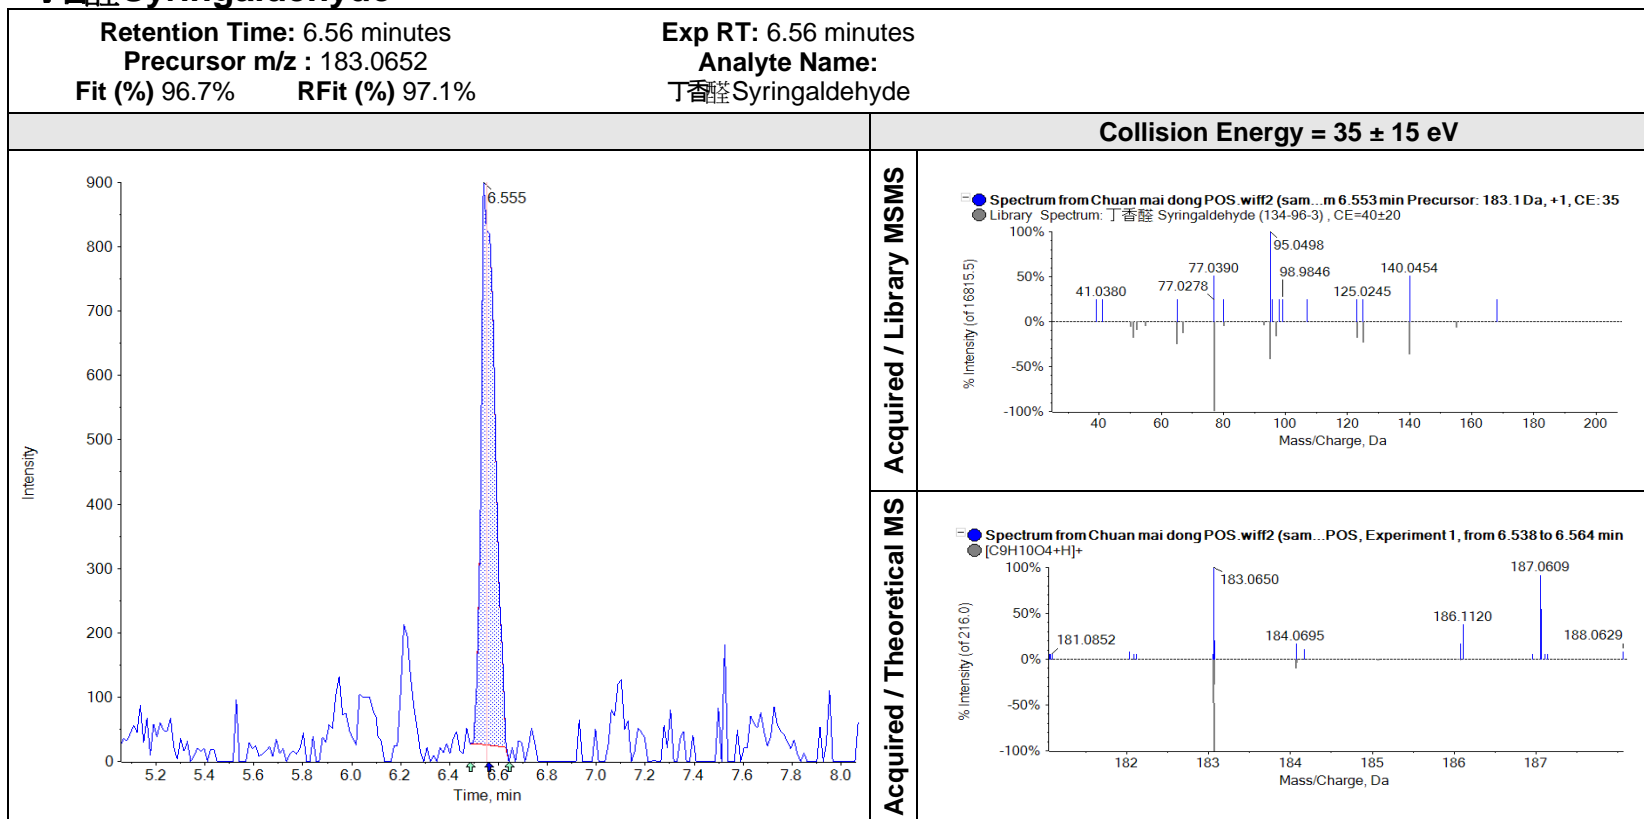



### 木犀草苷 Luteoloside

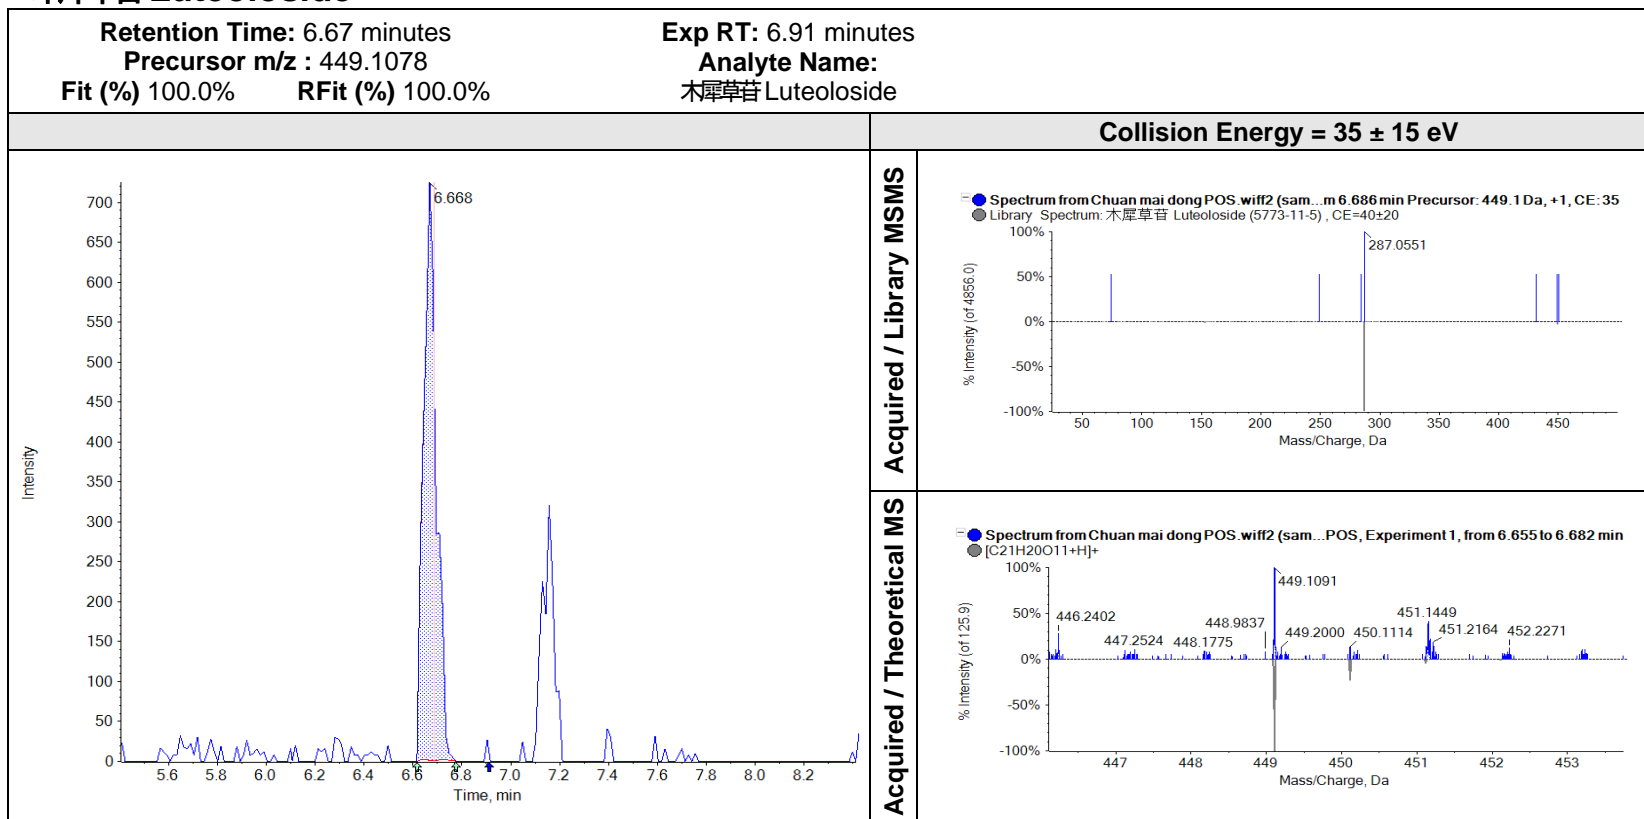

### 异阿魏酸 Isoferulic acid

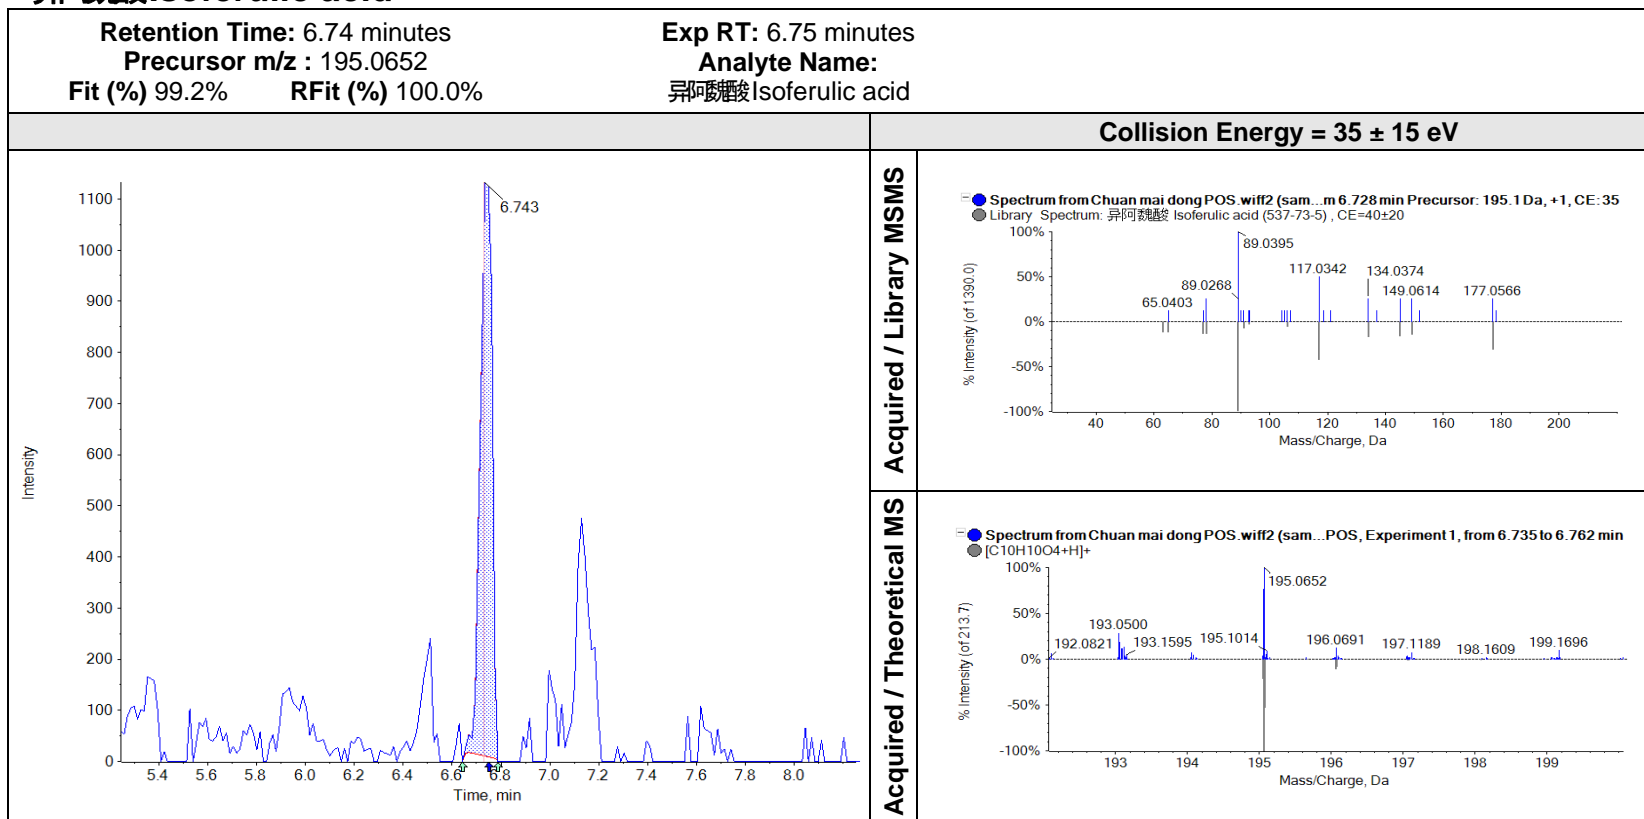

### 芸香柚皮苷 Narirutin

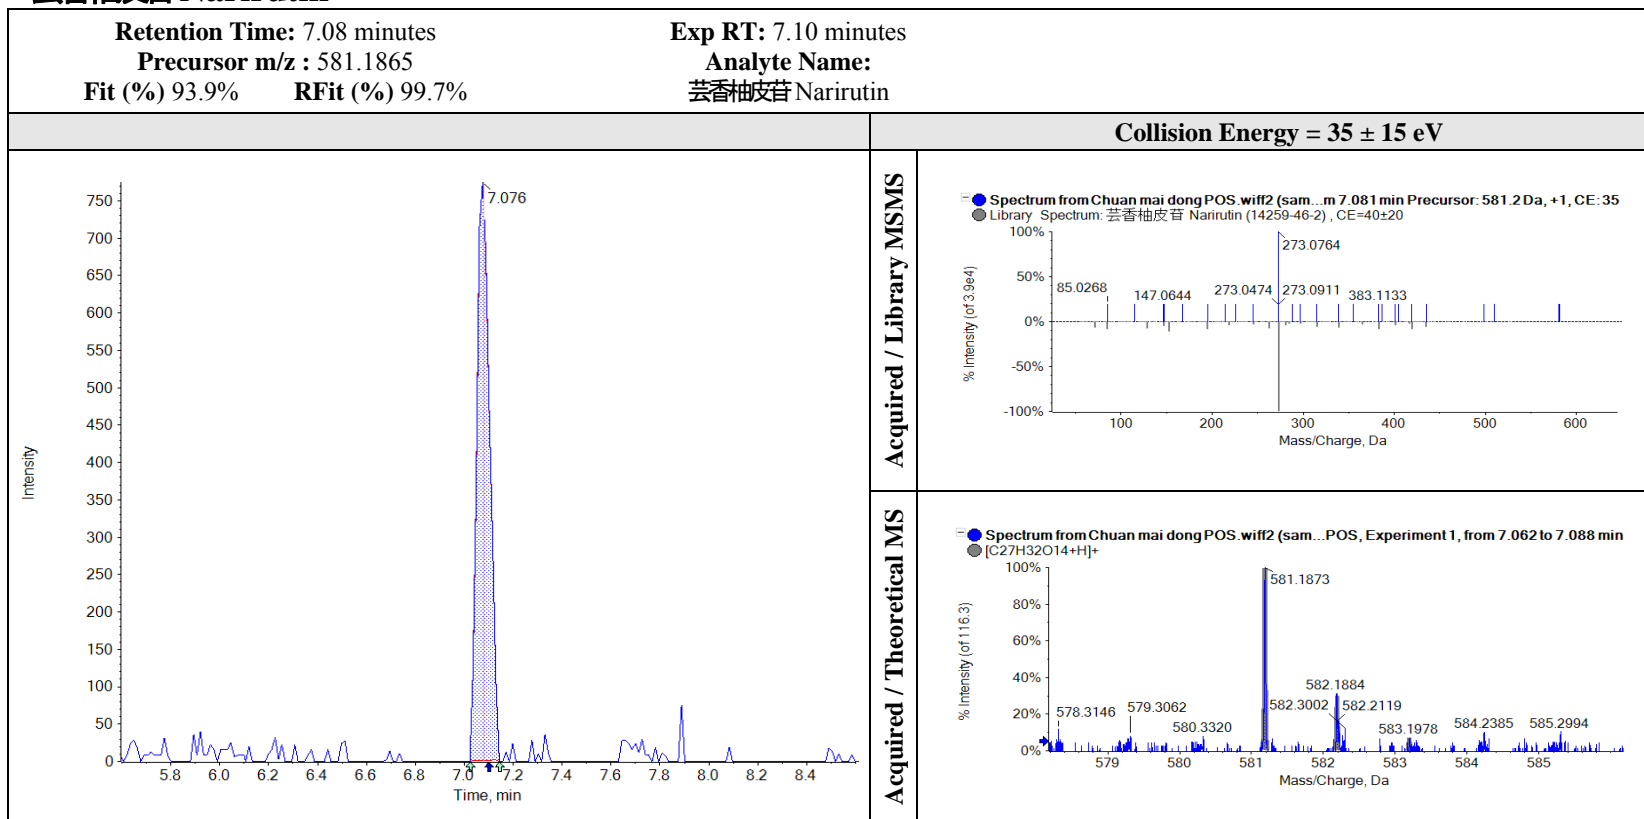

### 新橙皮苷 Neohesperidin

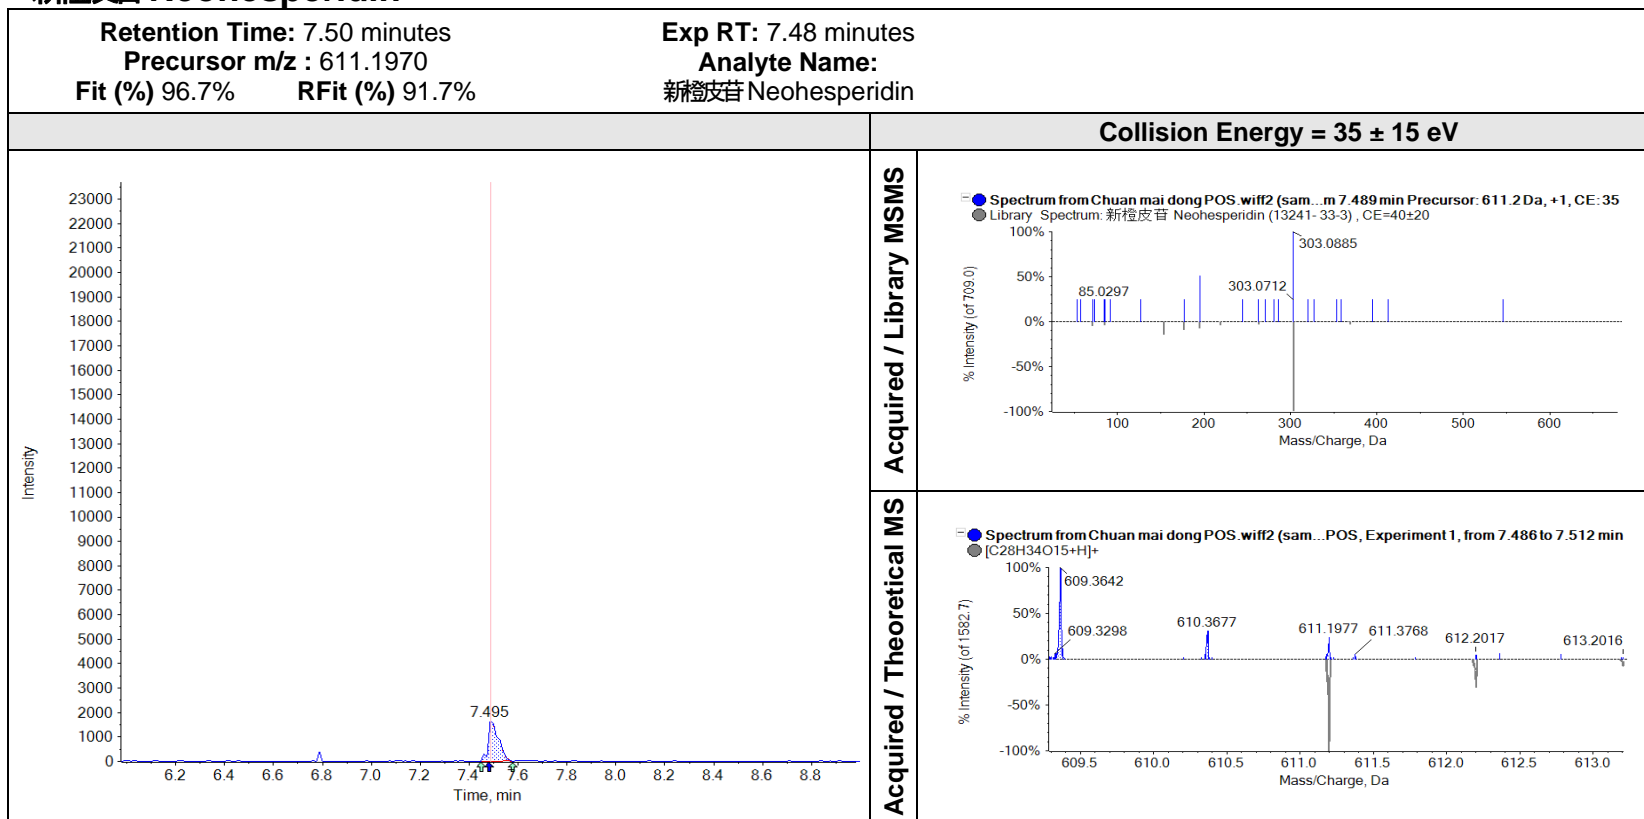

### 槲寄生 Tiliroside

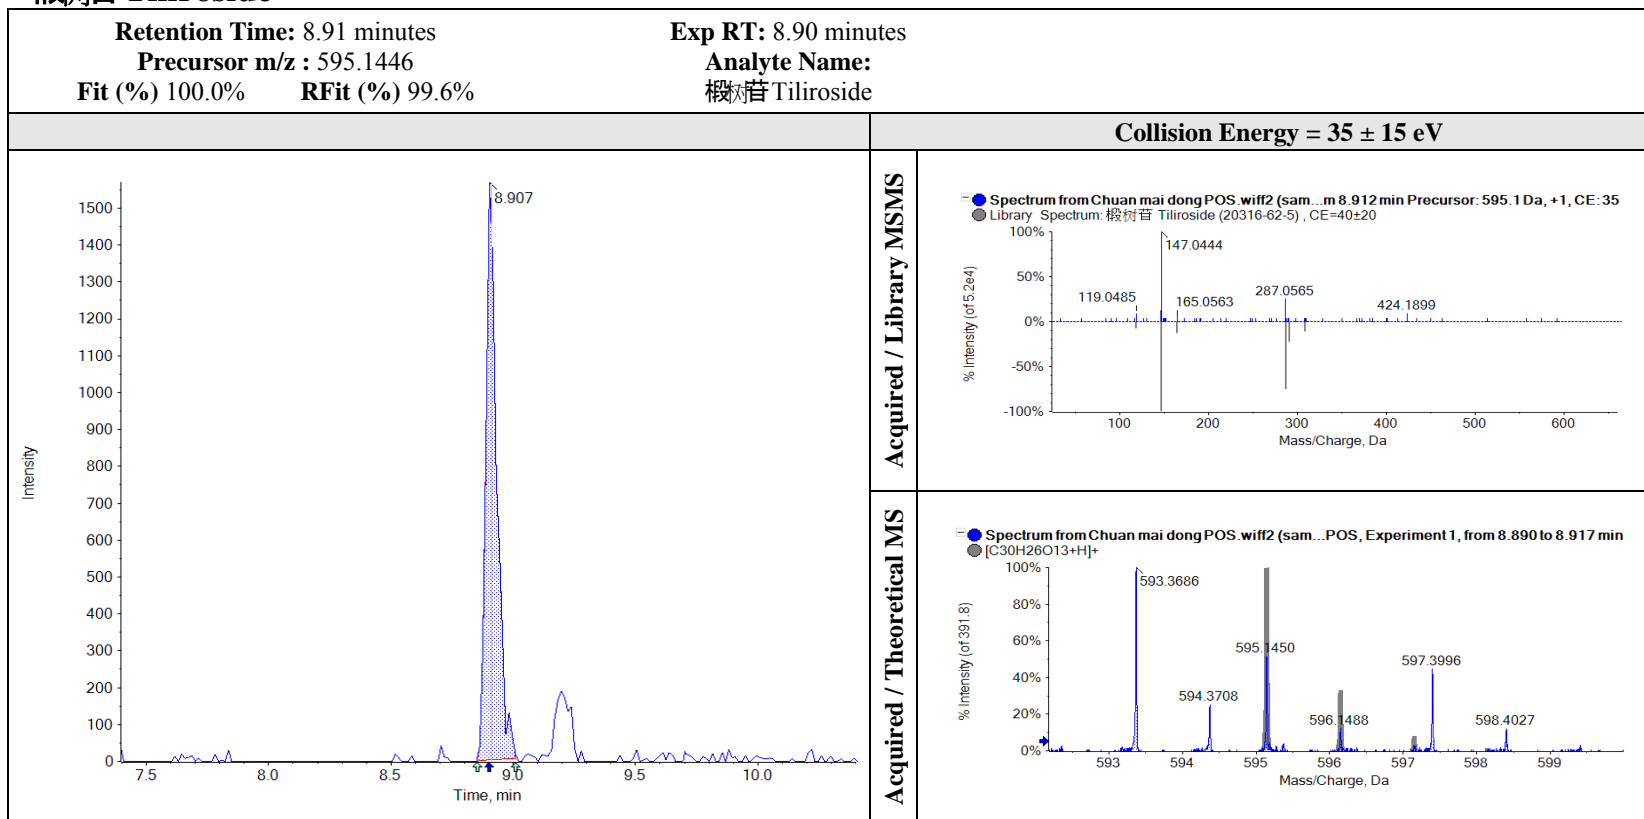

### 毛蕊异黄酮苷 Calycosin-7-O-glucoside

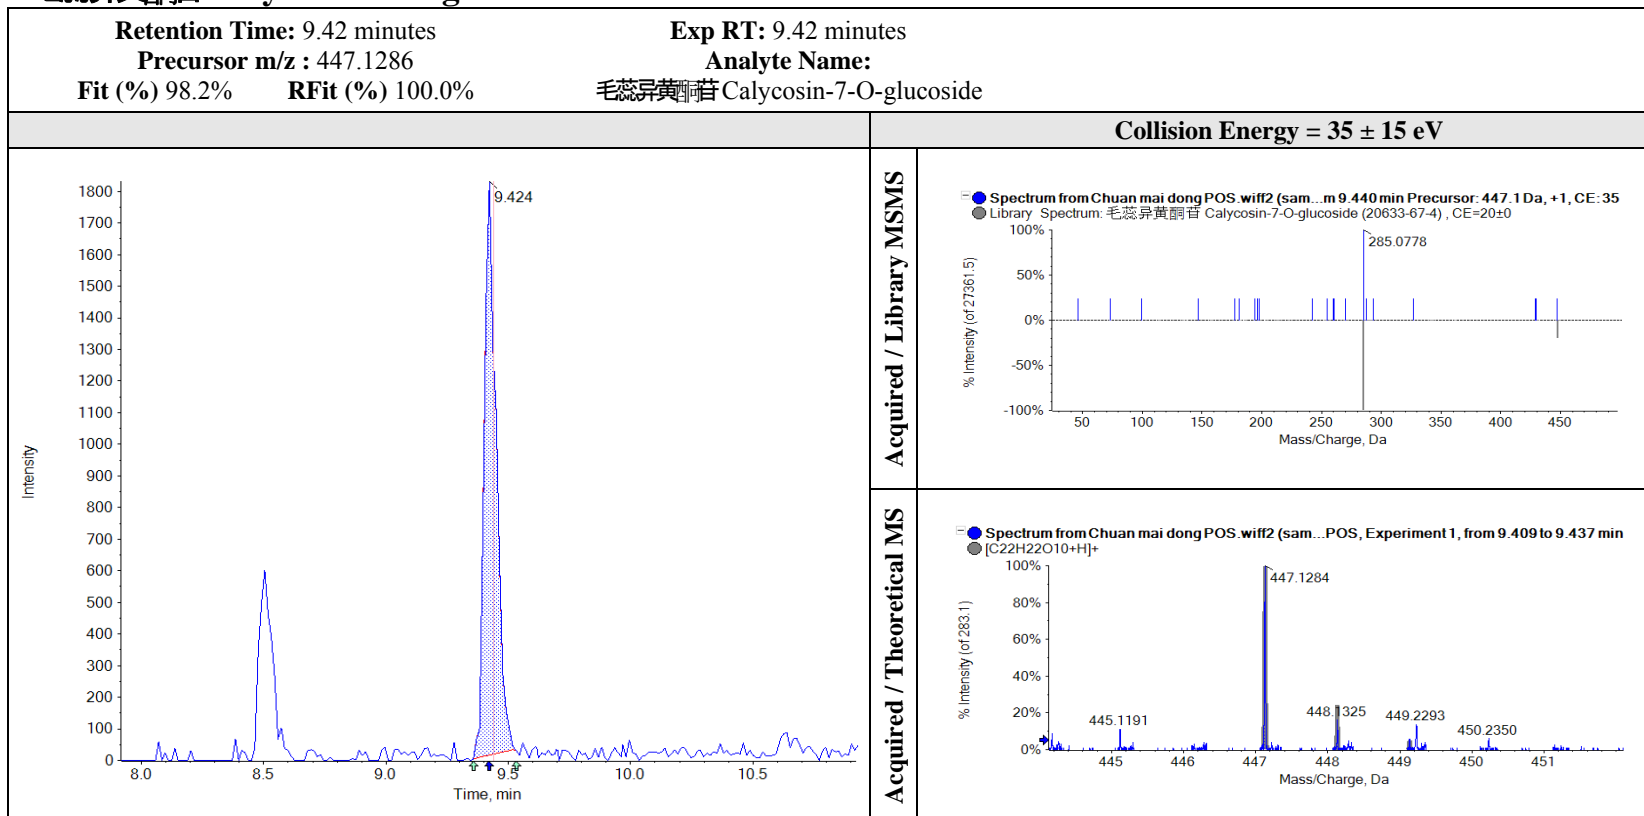

### 川陈皮素 Nobiletin

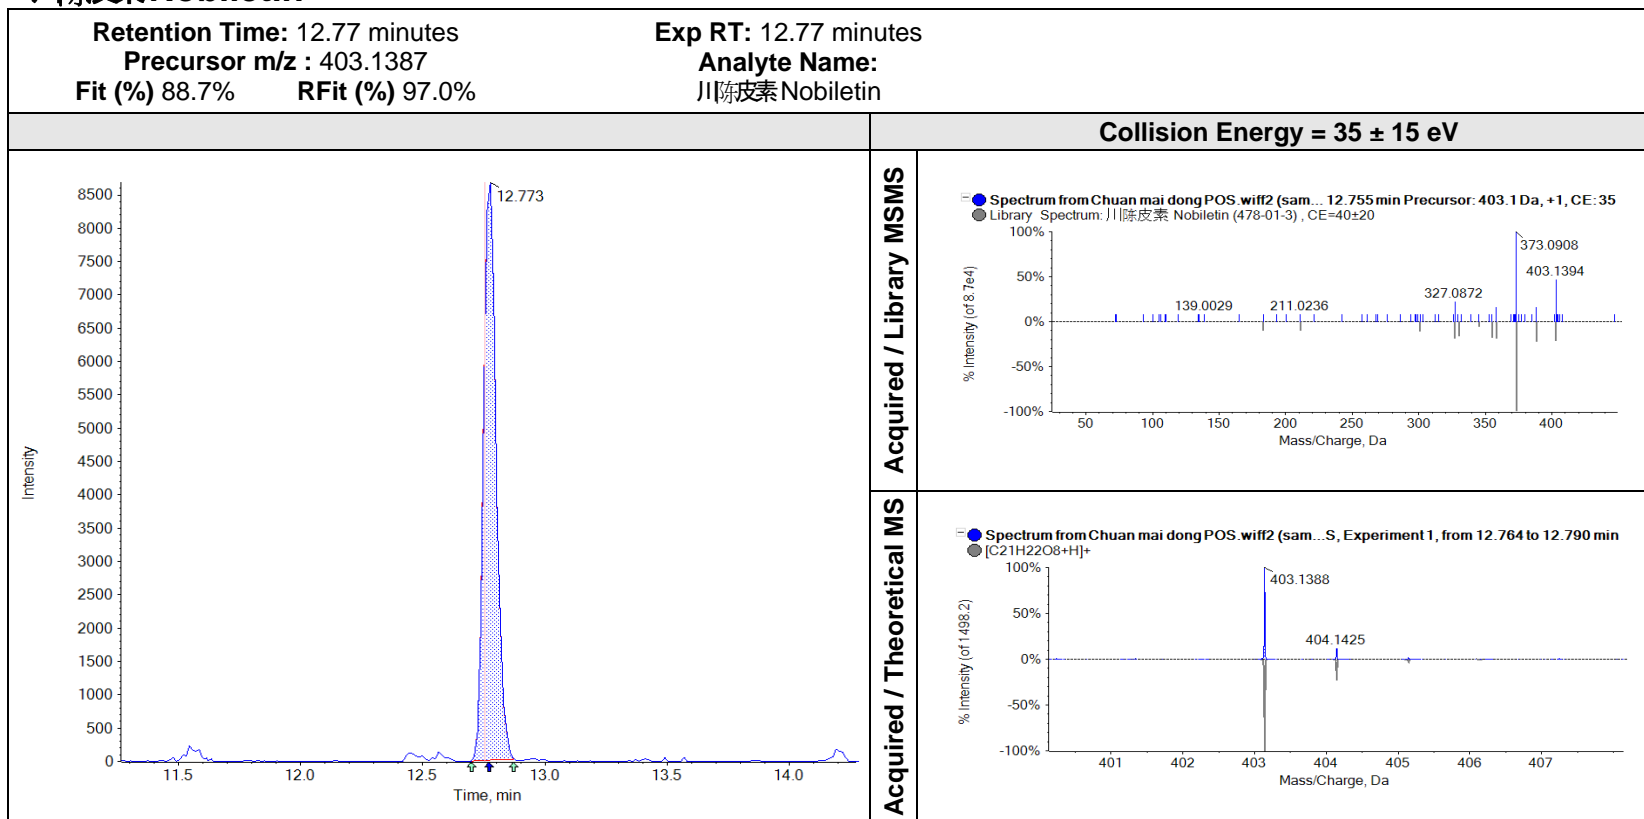

### 麦冬皂苷 D' Ophiopogonin D'

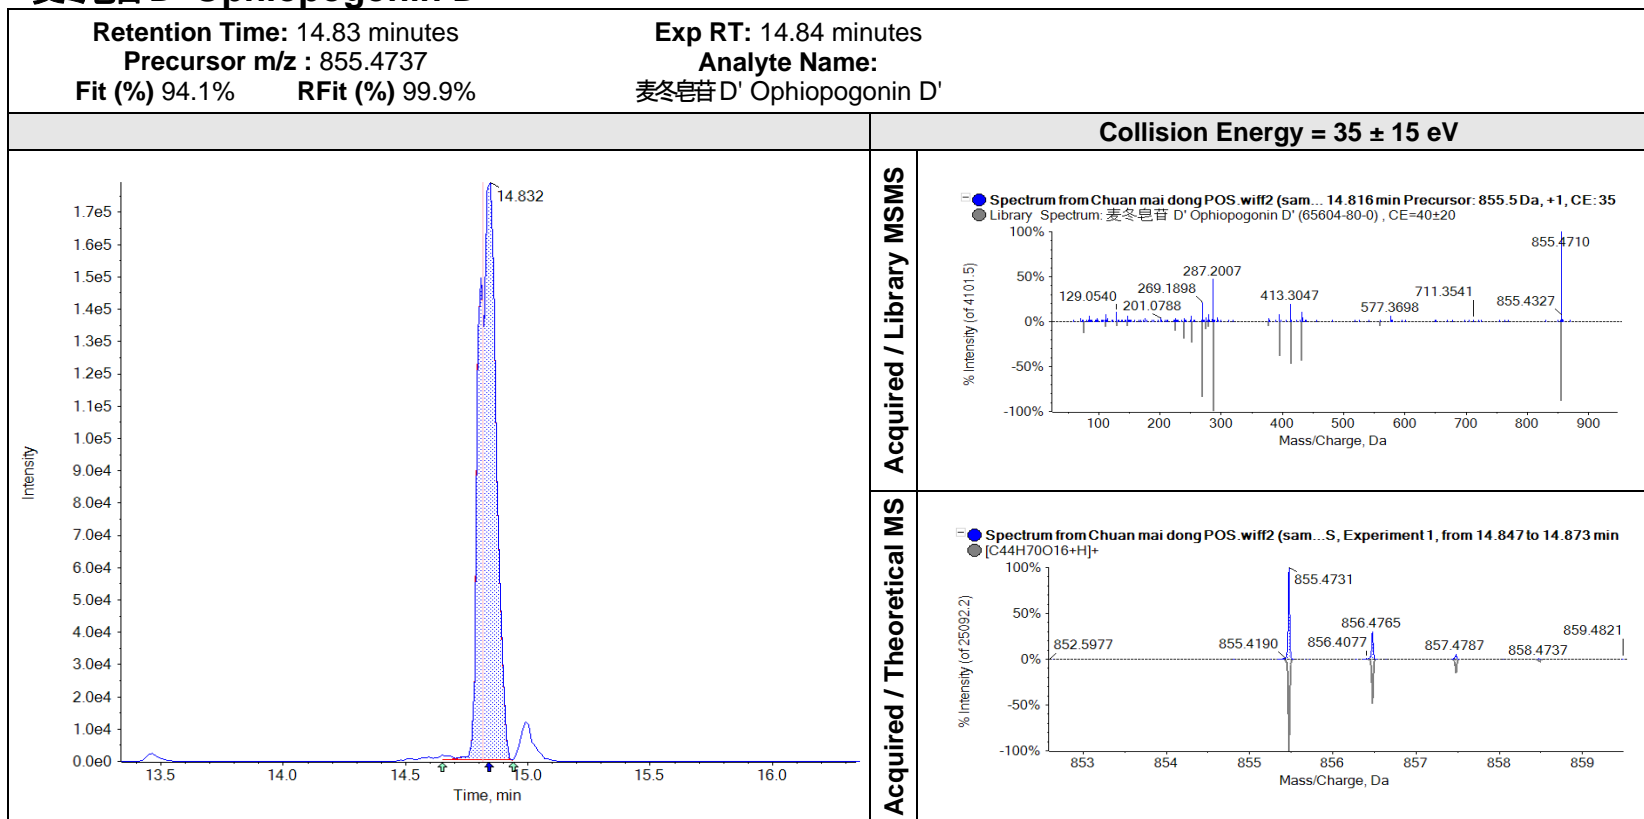



### 鲁斯可皂苷元 Ruscogenin

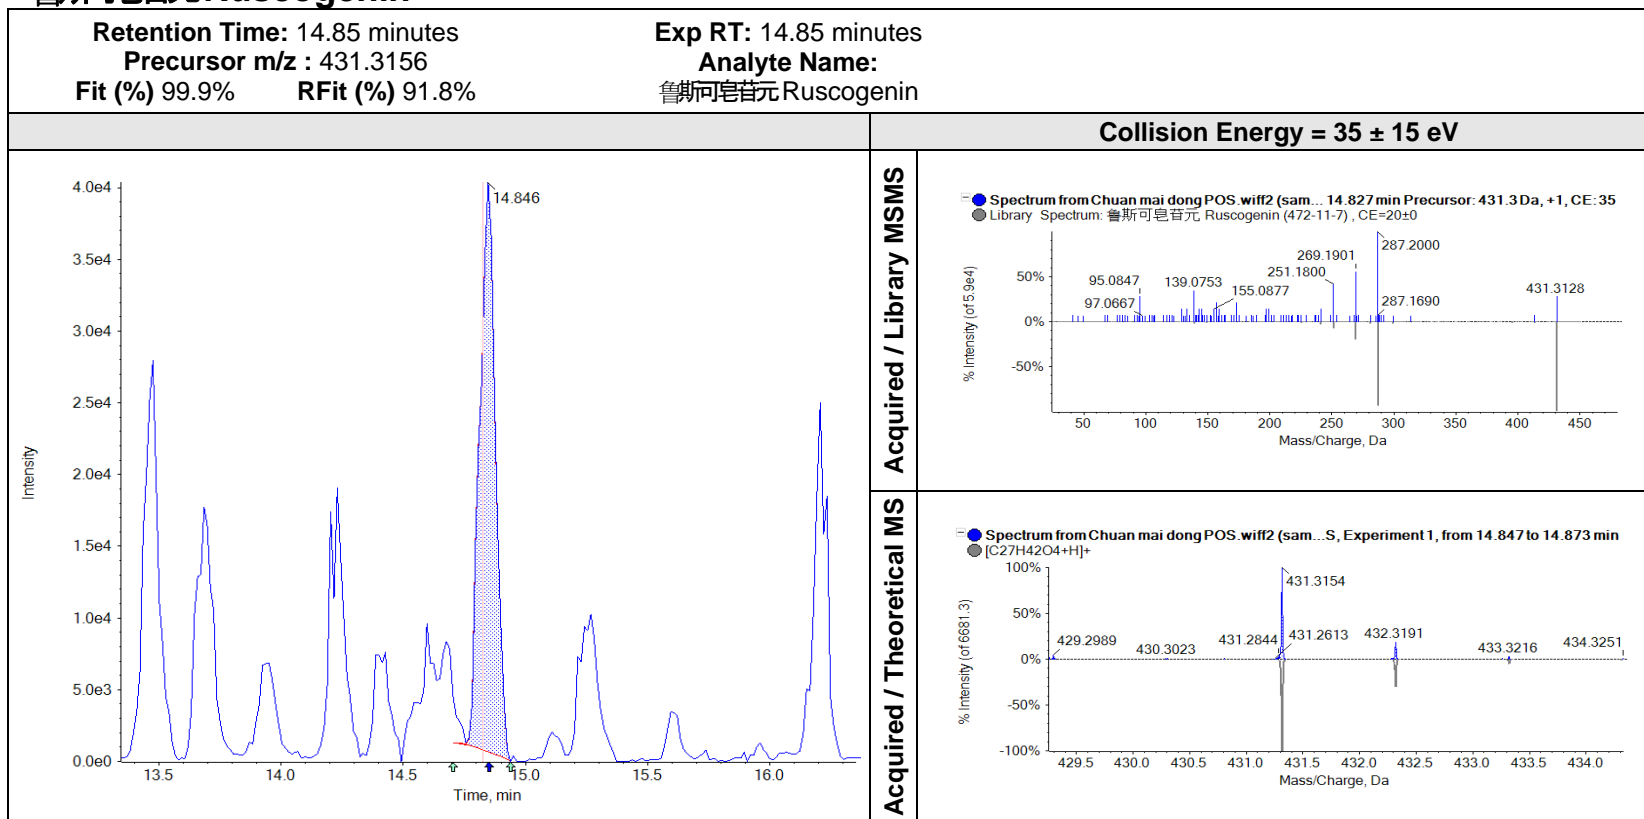

MS fragmentation pathways for different chemical constituents of CMD in negative ion mode

组氨酸 Histidine

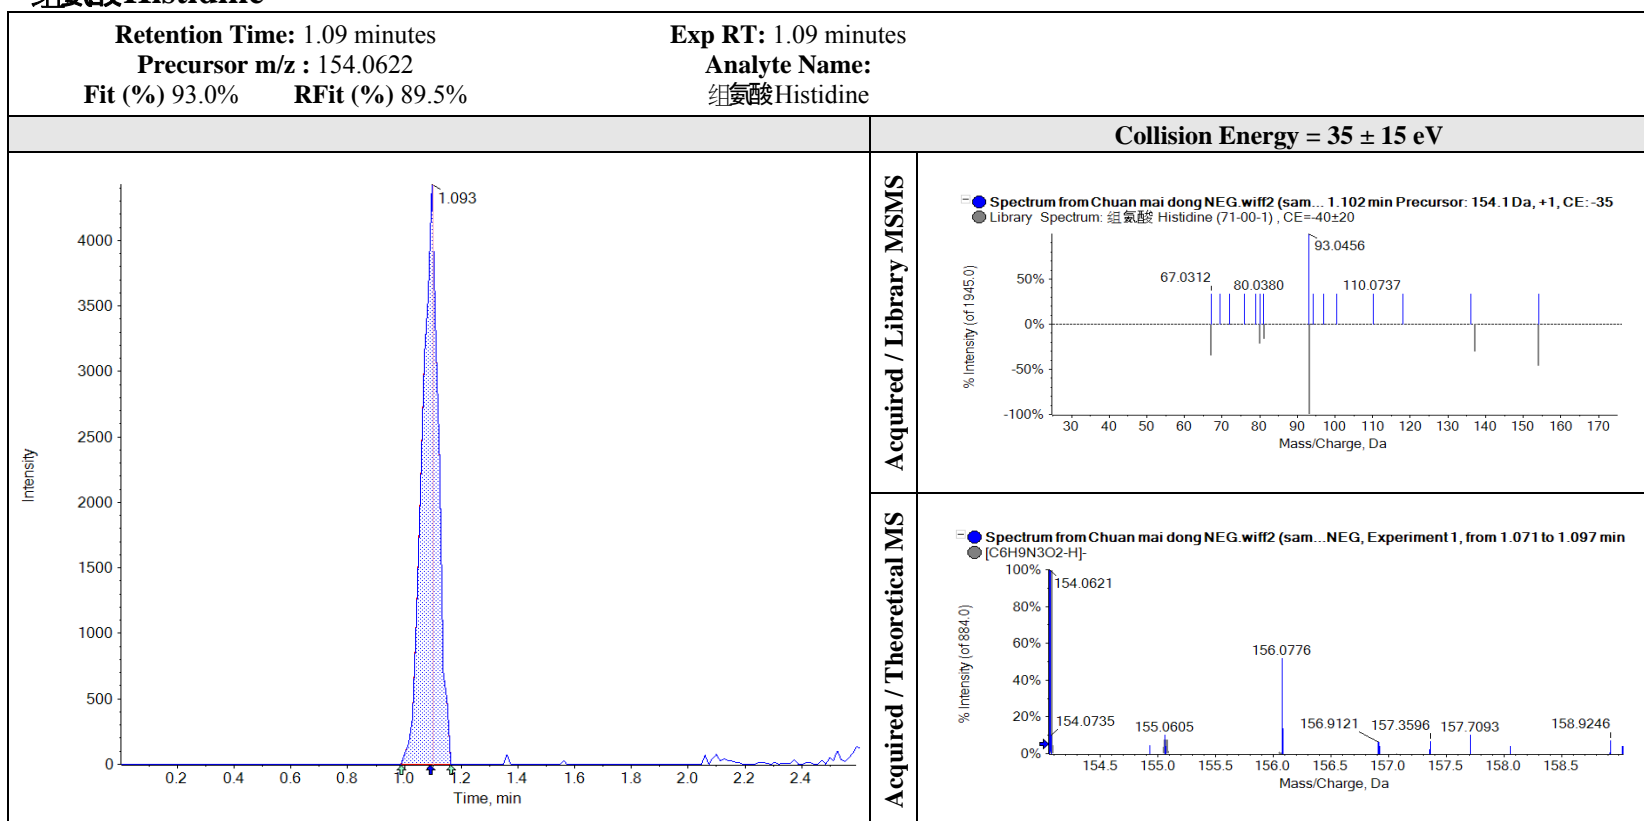

**精氨酸L(+)-Arginine**

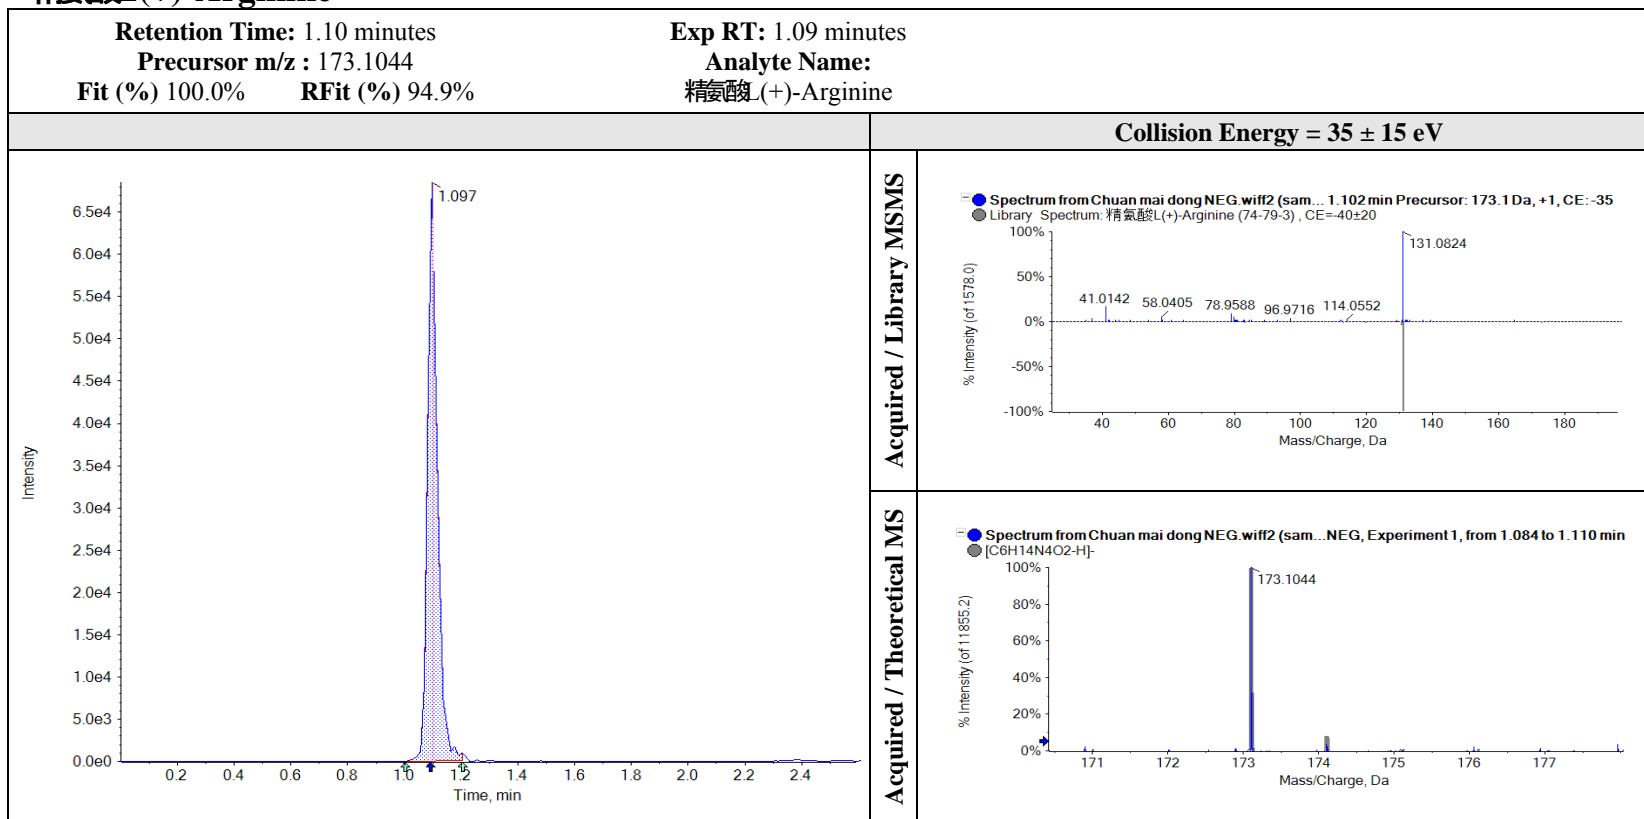

### 谷氨酸 Glutamic acid

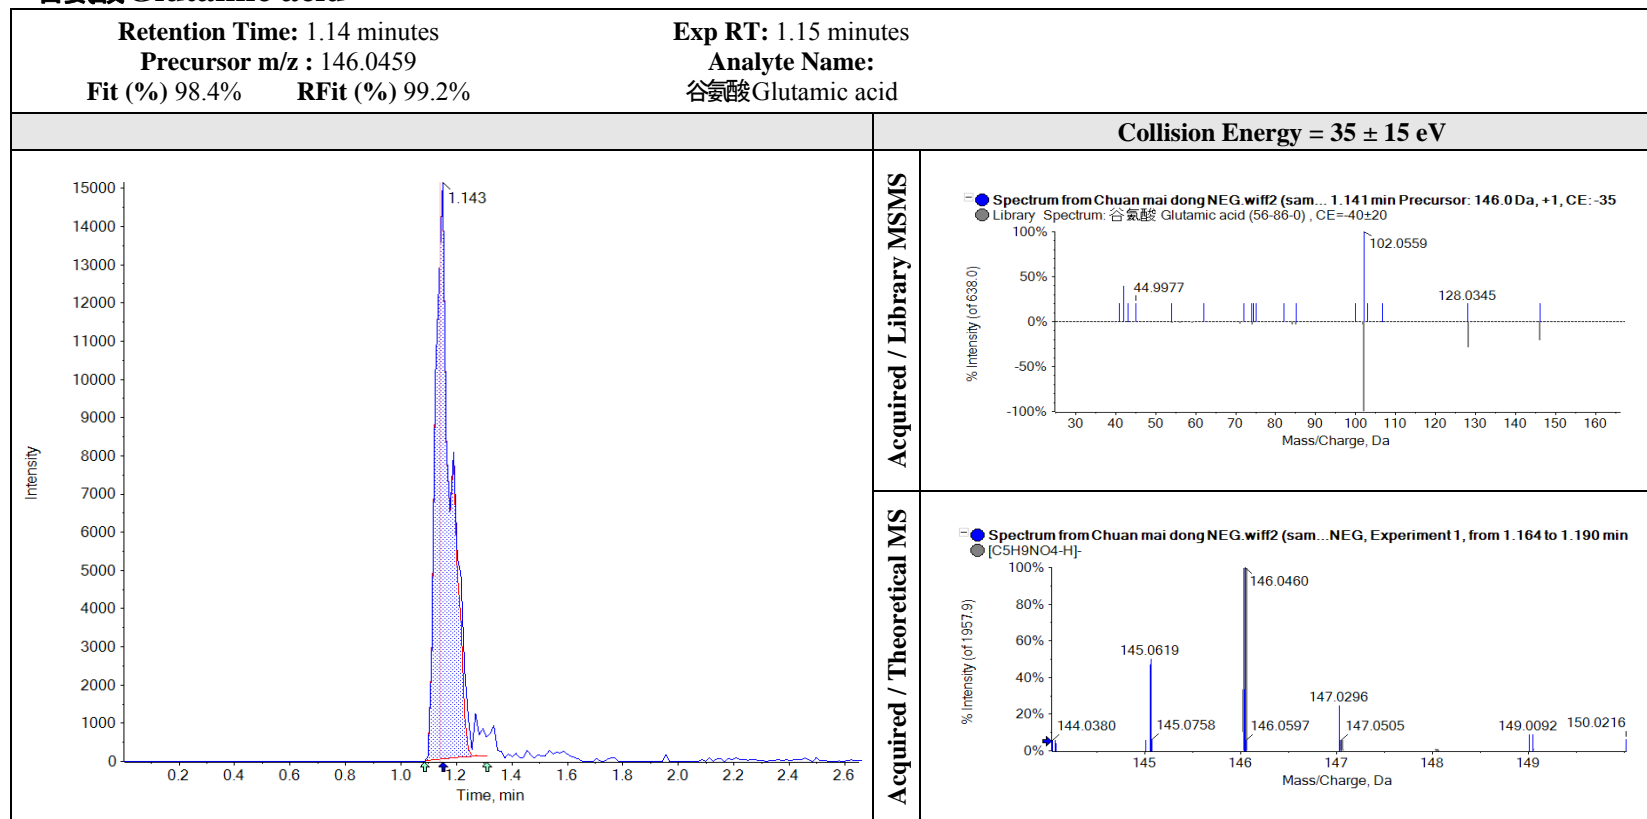

### D-甘露糖D-(+)-Mannose

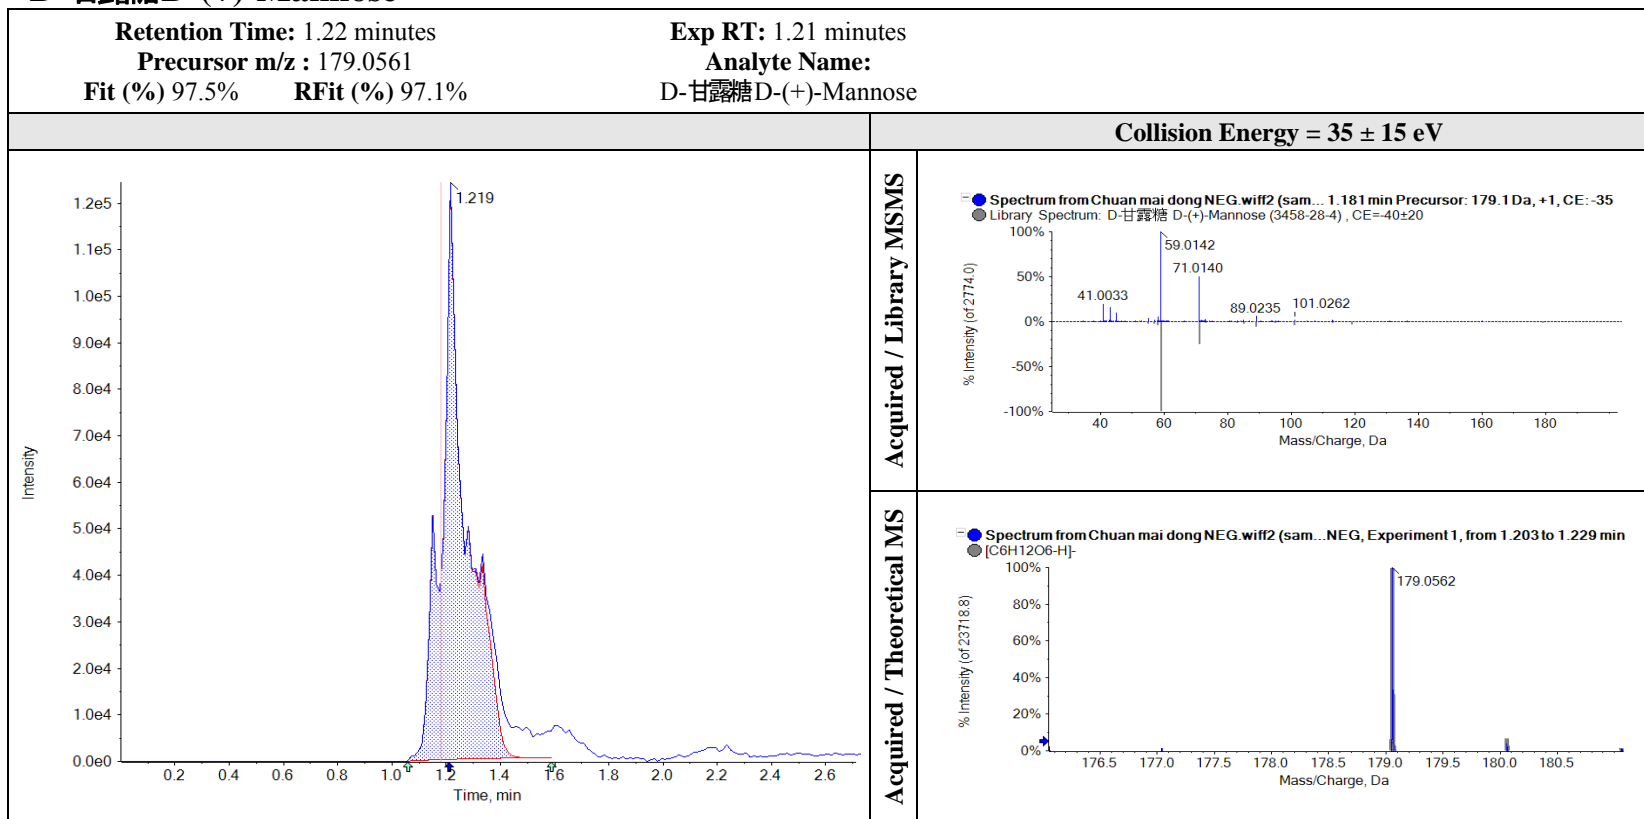

### L-苹果酸 L-Malic acid

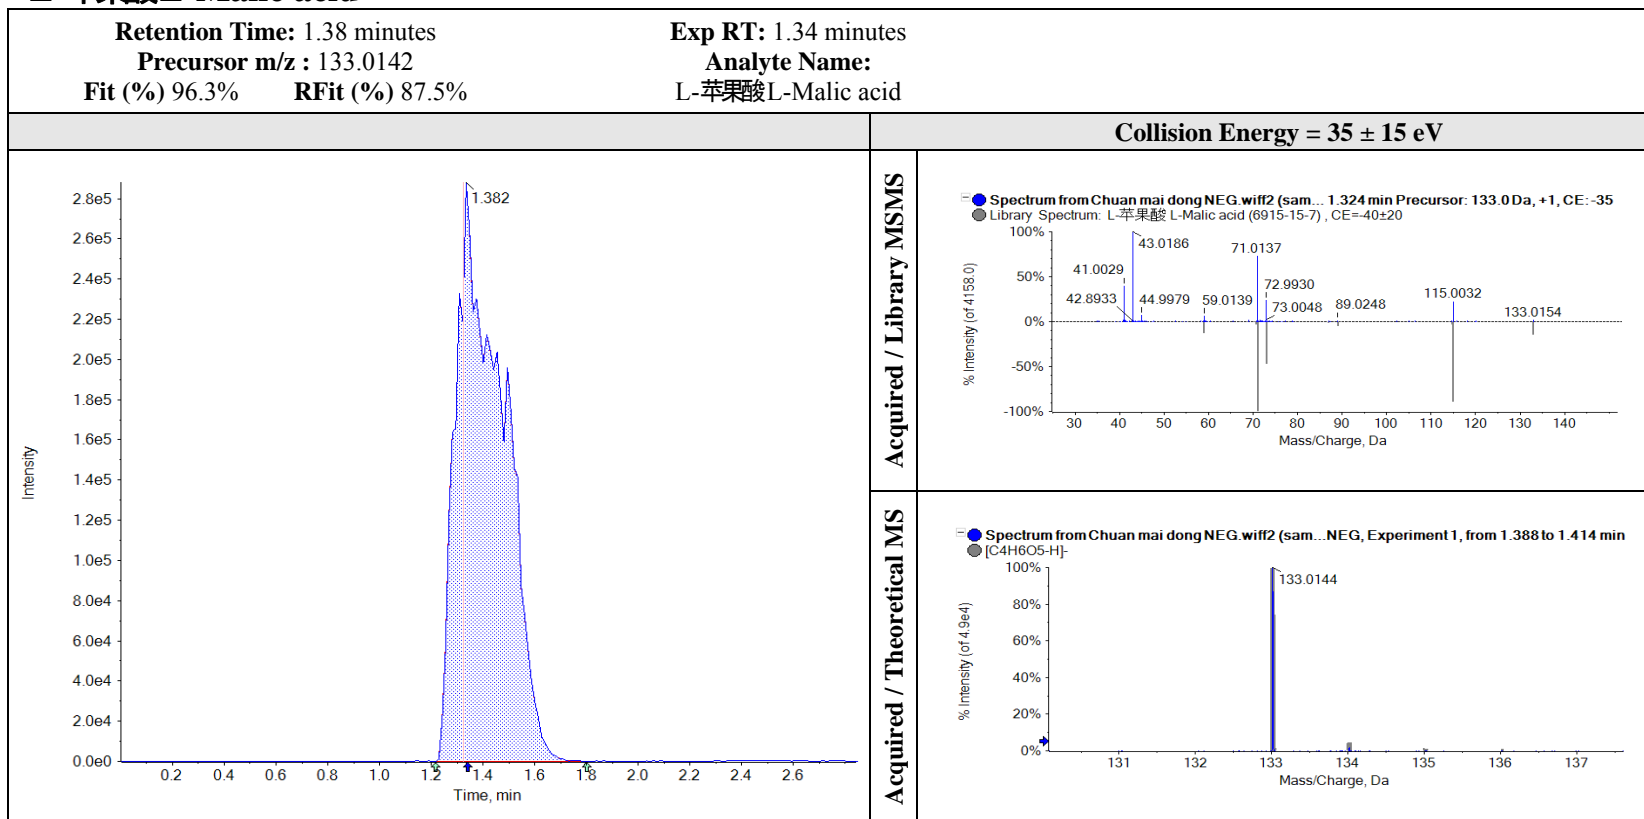

柠檬酸 Citric acid

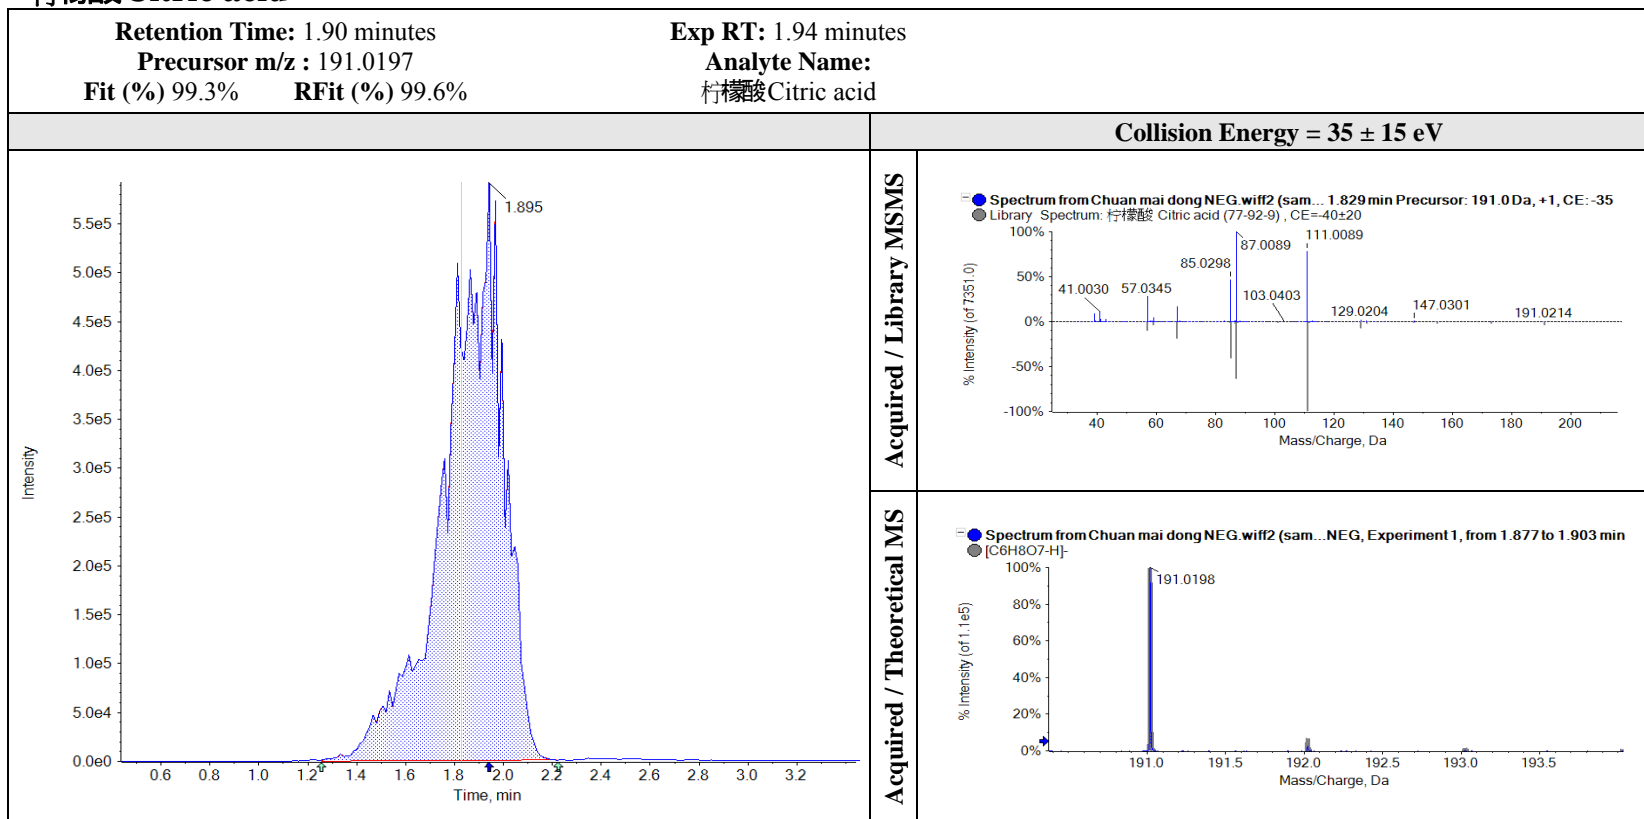

**琥珀酸 Succinic acid**

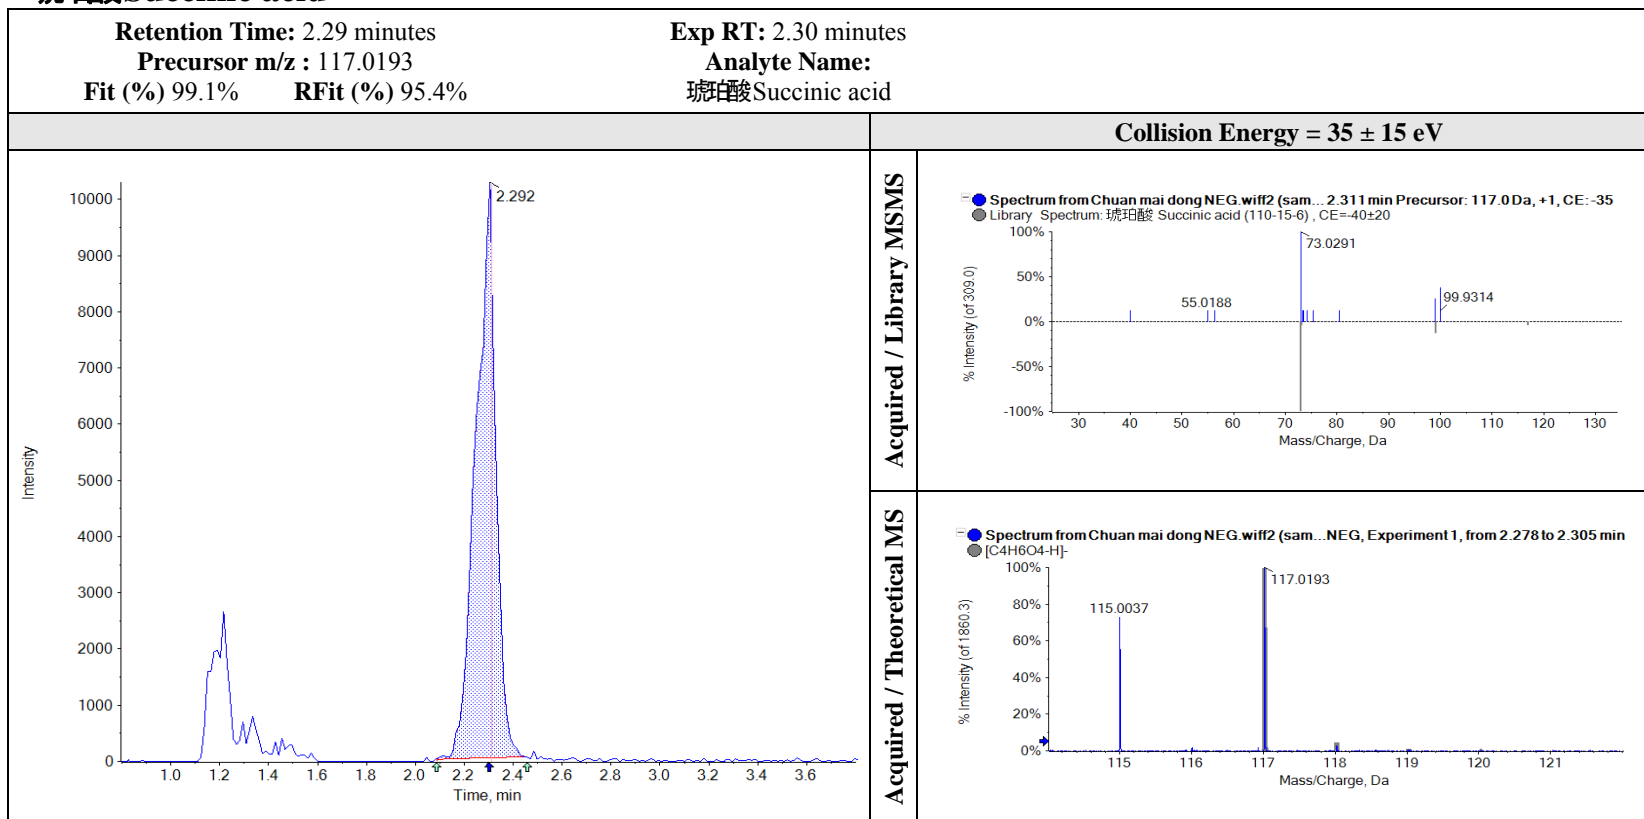



### 亮氨酸 Leucine

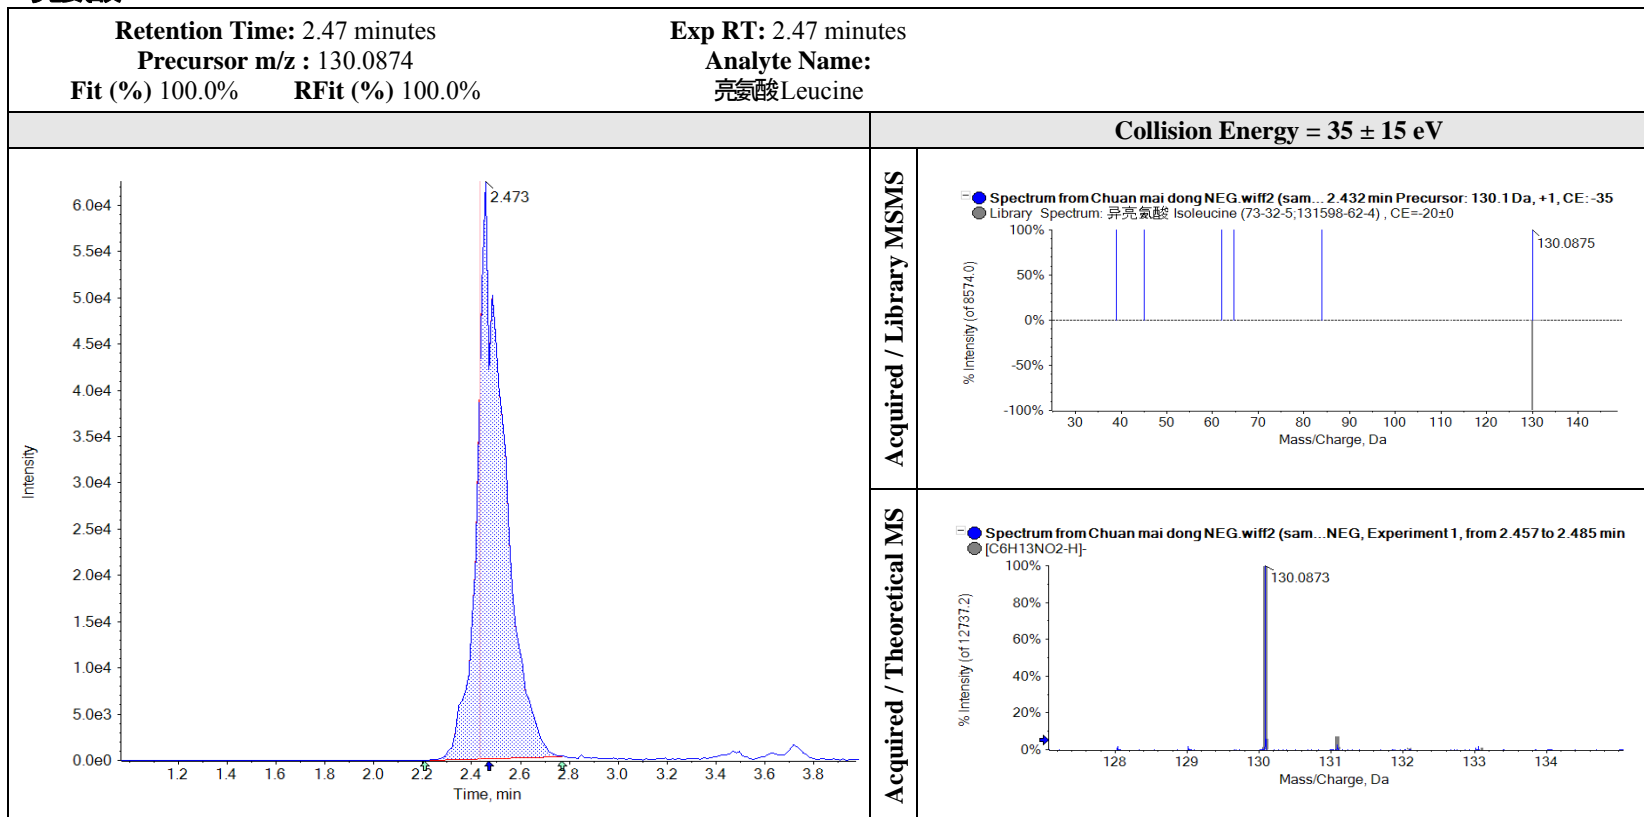

### 鸟苷 Guanosine

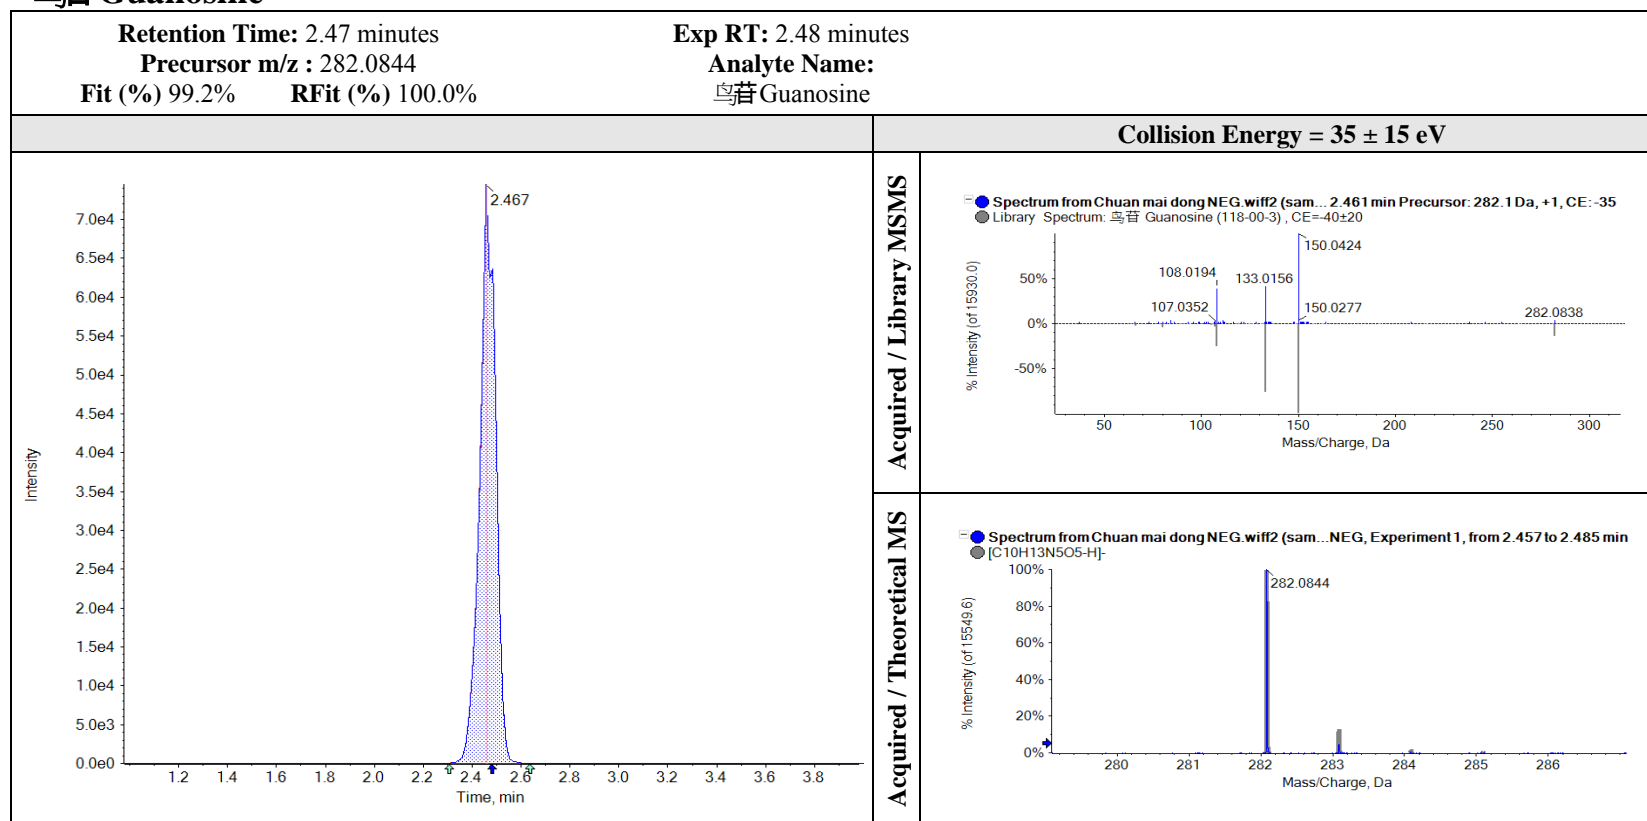

### 没食子酸 Gallic acid

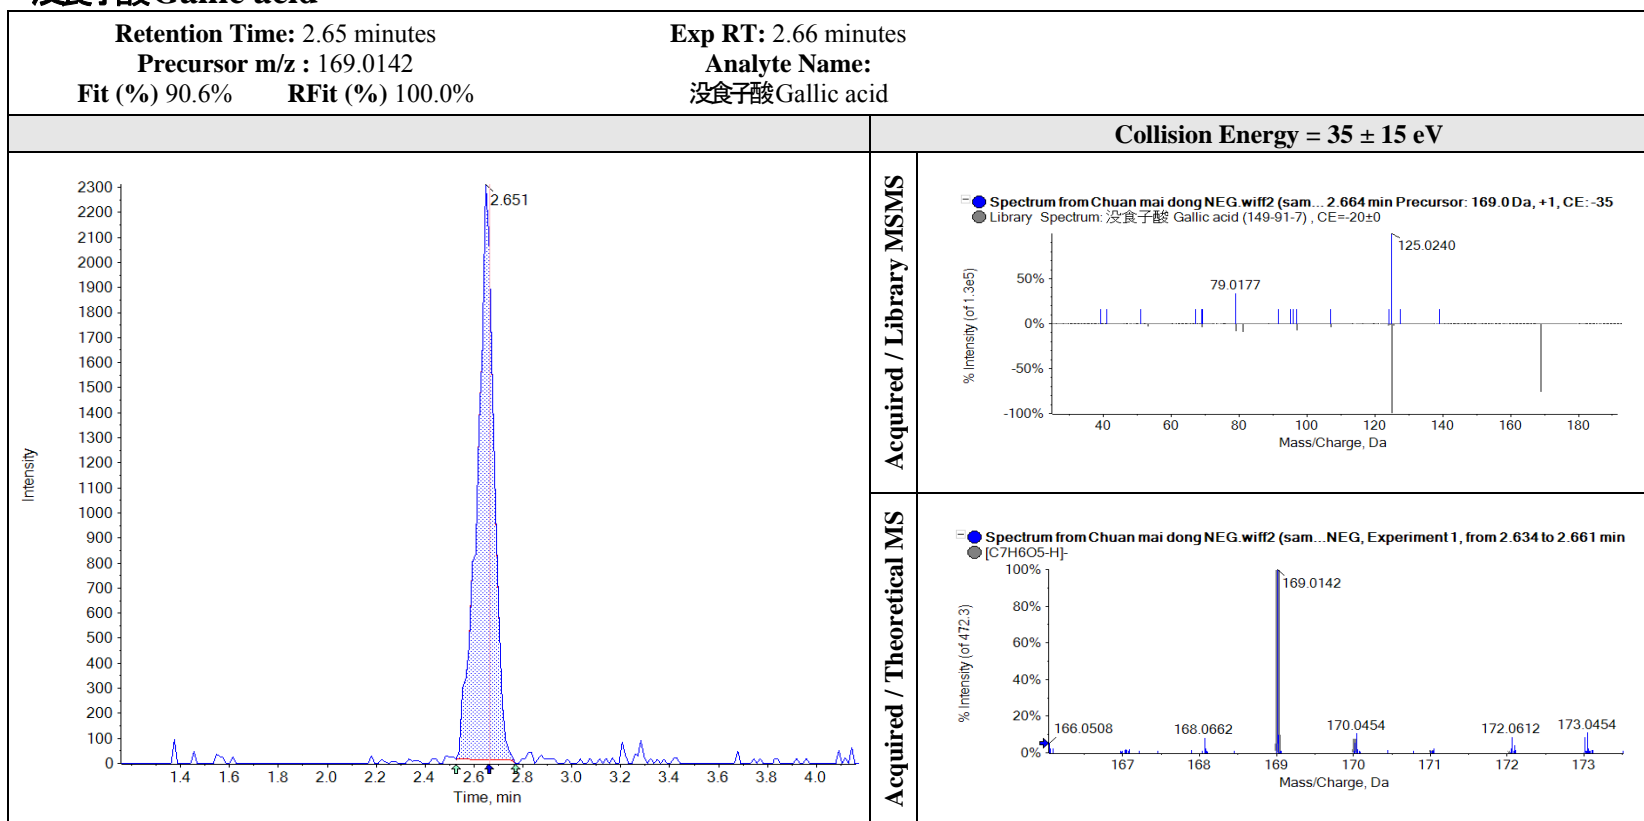

**苯丙氨酸 Phenprobamate**

|                                                                                                                                                                                                                         |                                         |
|-------------------------------------------------------------------------------------------------------------------------------------------------------------------------------------------------------------------------|-----------------------------------------|
| <p><b>Retention Time:</b> 3.18 minutes      <b>Exp RT:</b> 3.18 minutes<br/> <b>Precursor m/z :</b> 164.0717      <b>Analyte Name:</b><br/> <b>Fit (%)</b> 97.9%      <b>RFit (%)</b> 98.0%      苯丙氨酸 Phenprobamate</p> |                                         |
| <p><b>Collision Energy = 35 ± 15 eV</b></p>                                                                                                                                                                             |                                         |
|                                                                                                                                                                                                                         | <p><b>Acquired / Library MSMS</b></p>   |
|                                                                                                                                                                                                                         |                                         |
|                                                                                                                                                                                                                         | <p><b>Acquired / Theoretical MS</b></p> |
|                                                                                                                                                                                                                         |                                         |

**香草酸** Vanillic acid

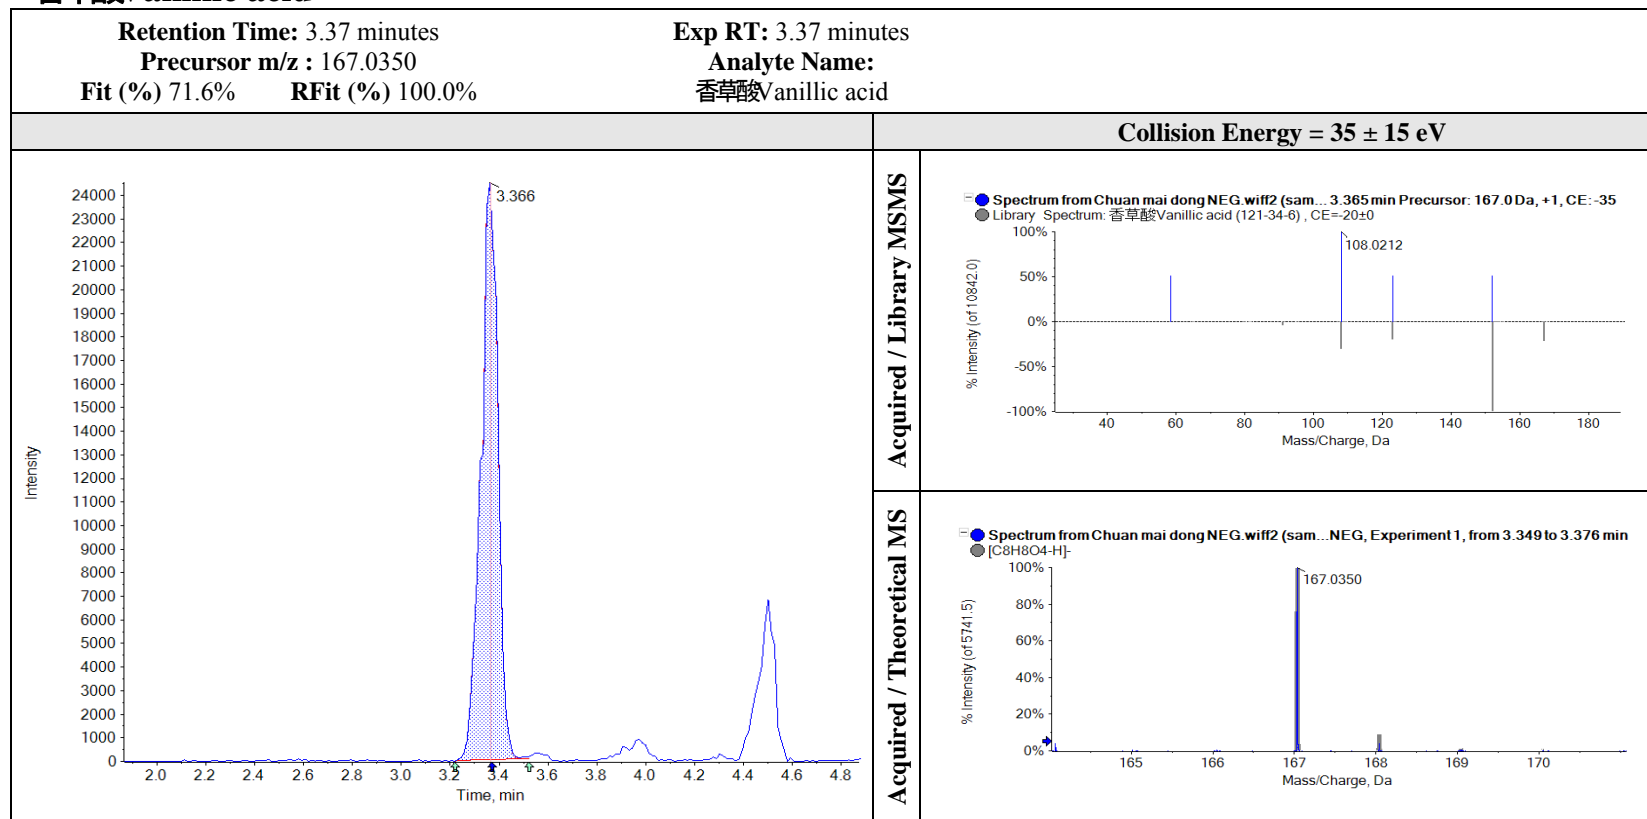

### 色氨酸 L-Tryptophan

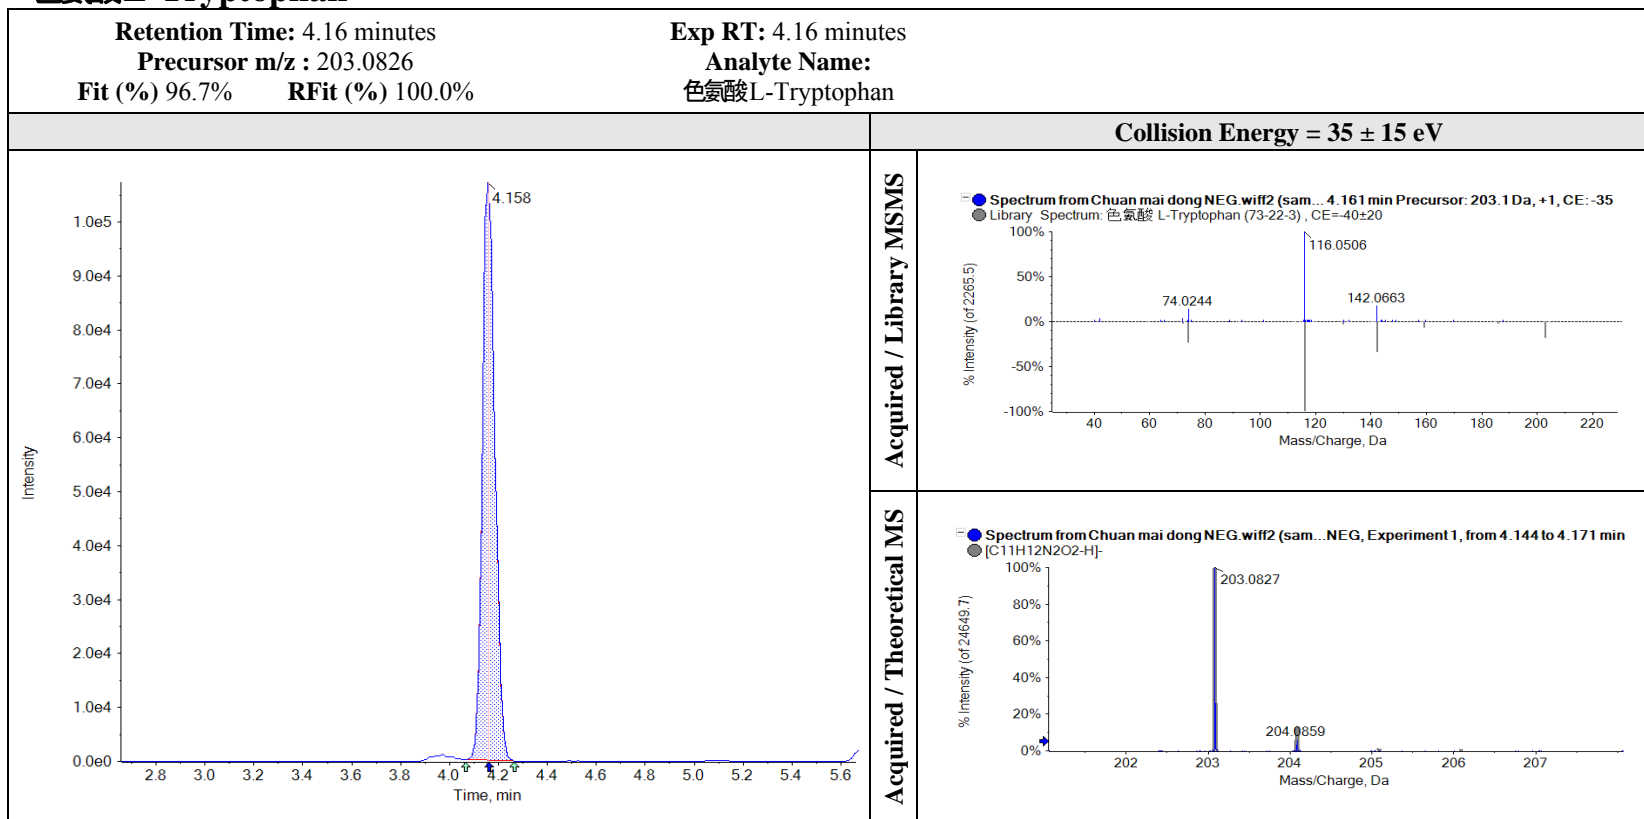

**对羟基苯甲酸 4-Hydroxybenzoic acid**

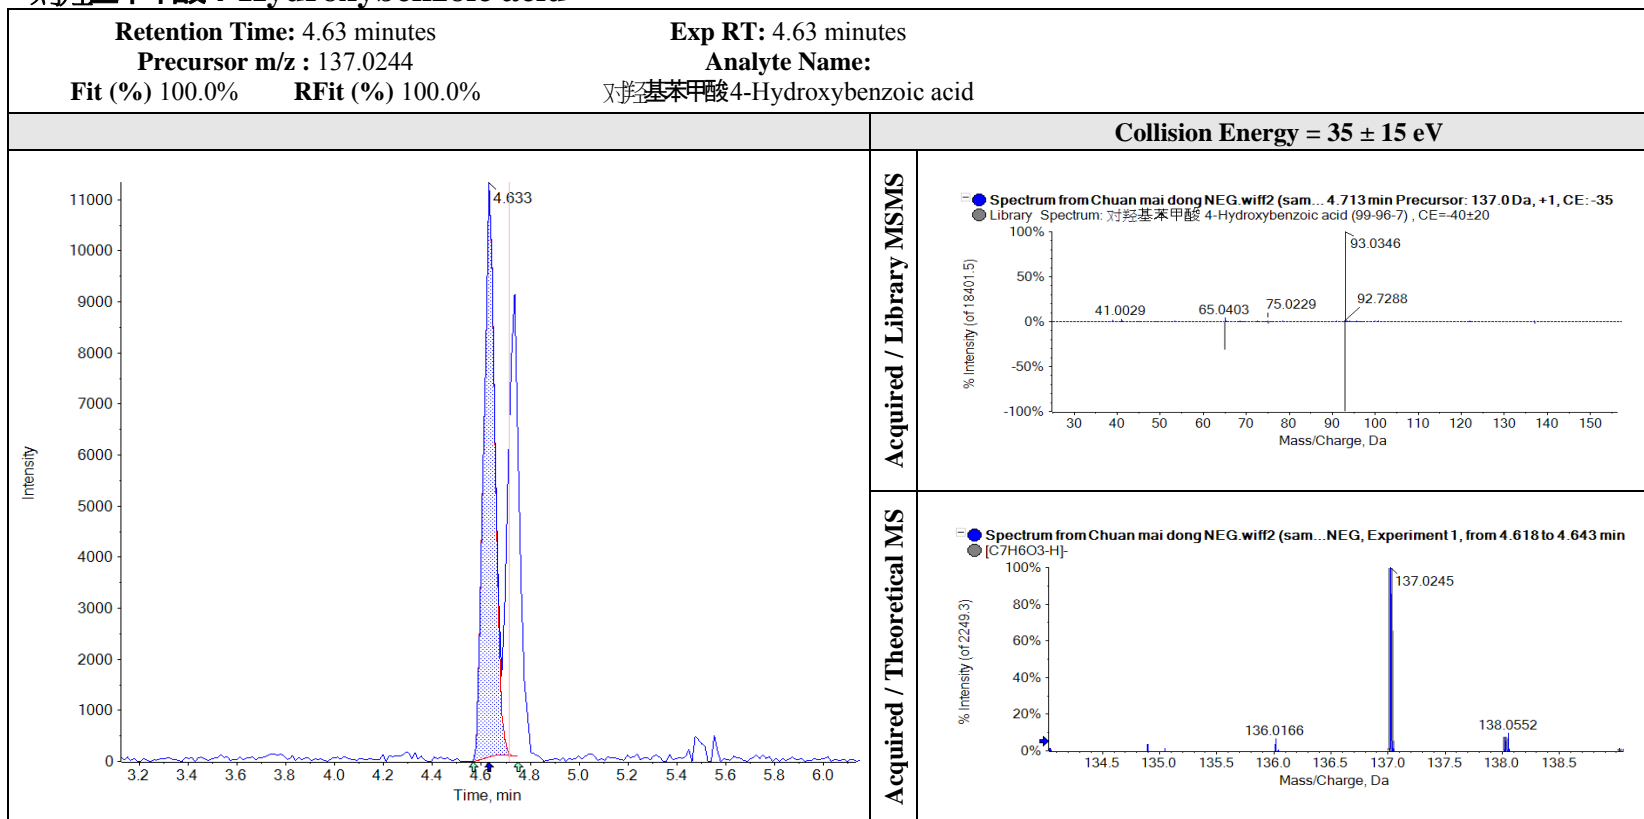

**隐绿原酸(5-咖啡酰奎宁酸) 4-O-Caffeoyl Quinic acid**

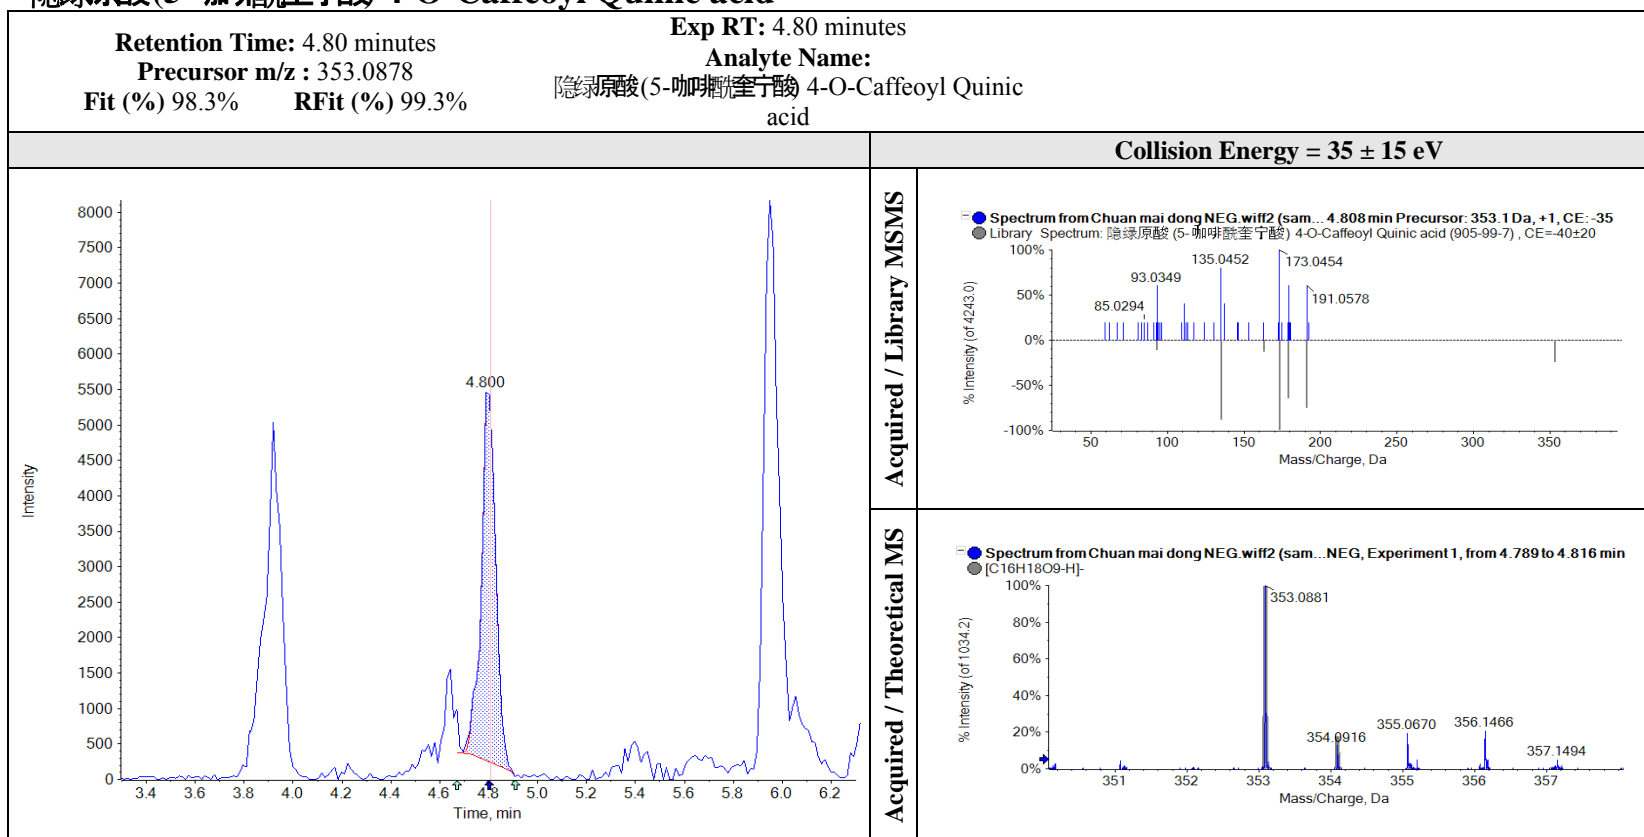



### 秦皮乙素 Esculetin

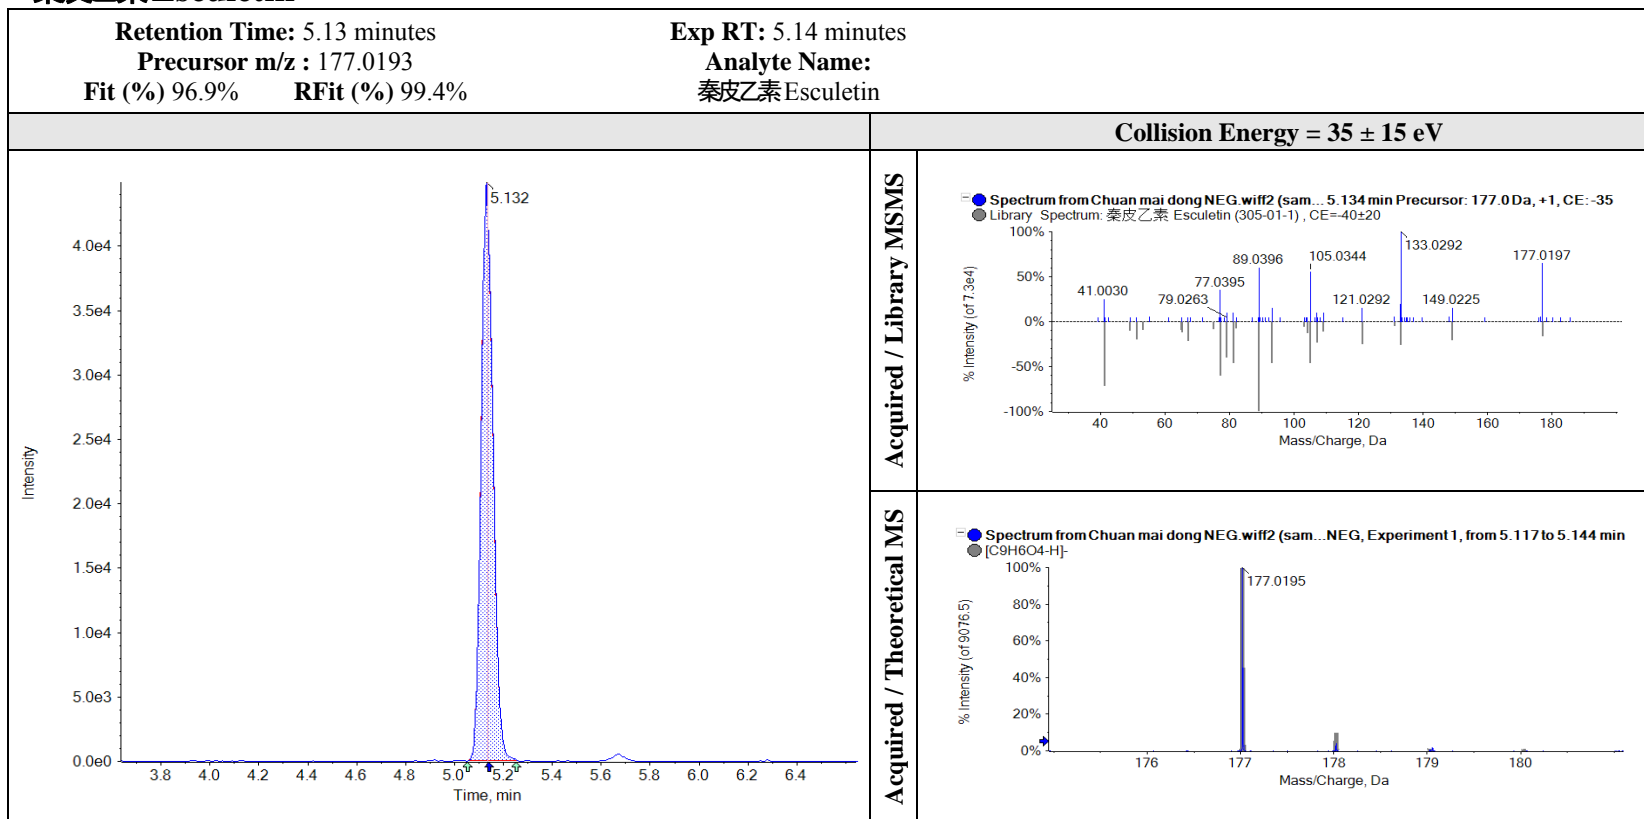

### 咖啡酸 Caffeic acid

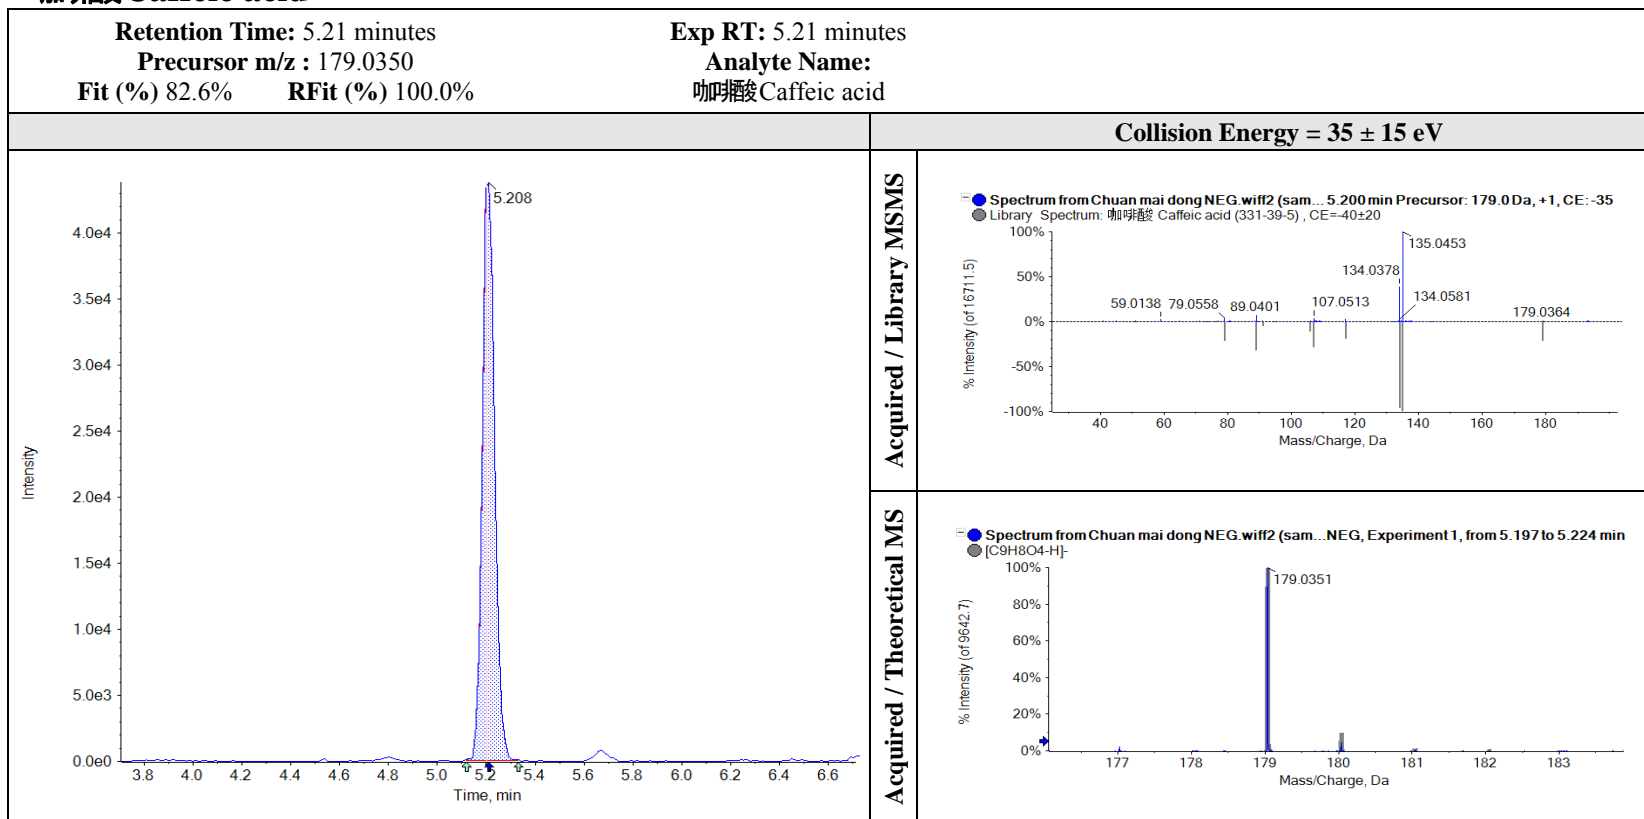

### 莽草酸 Shikimic acid

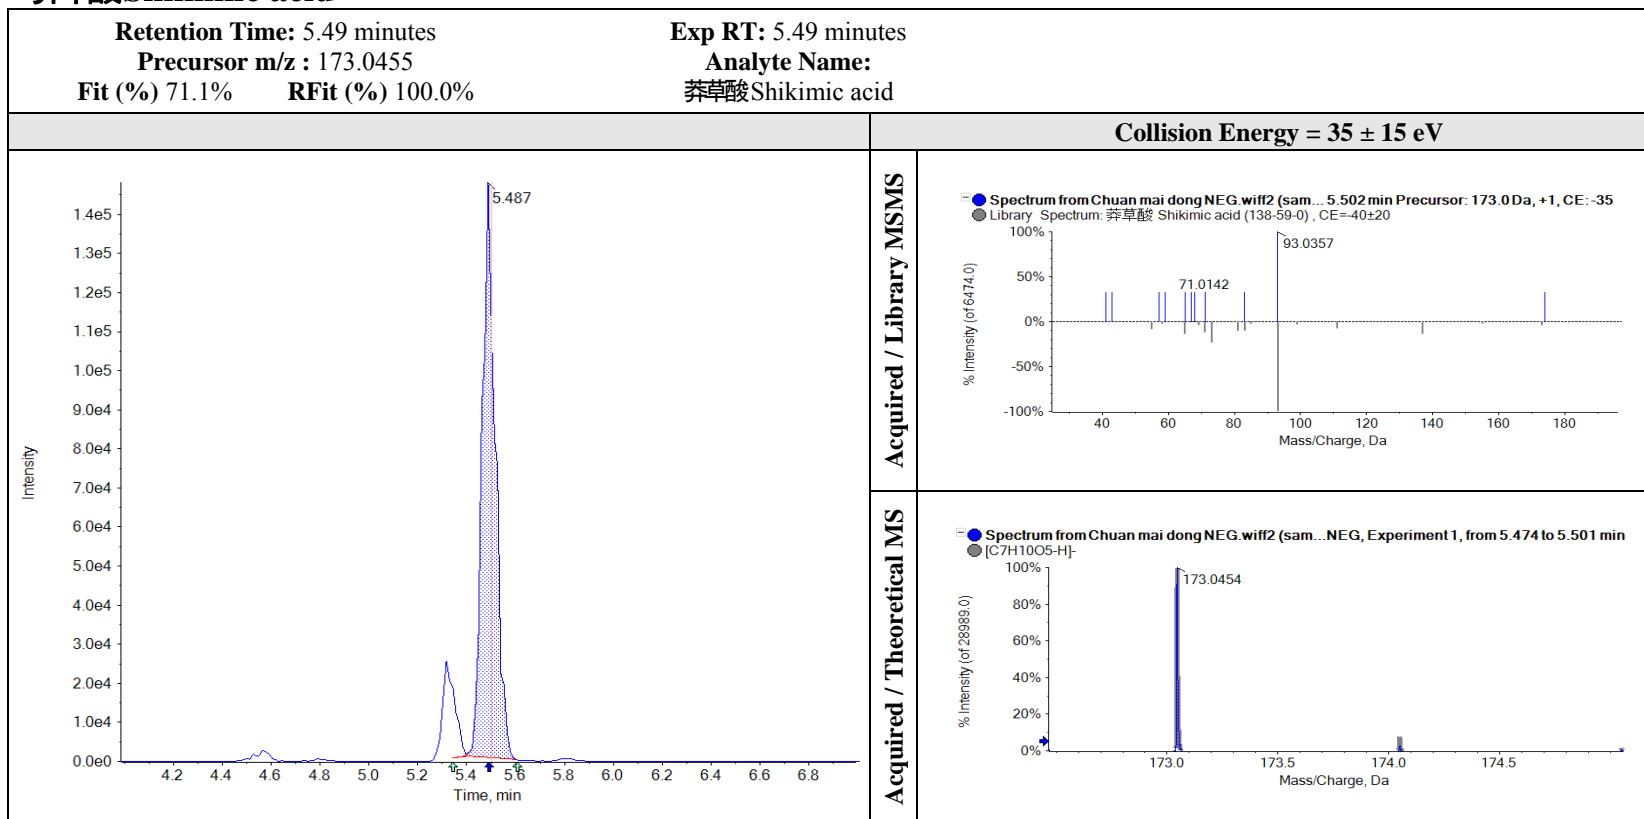

### 鞣花酸 Ellagic Acid

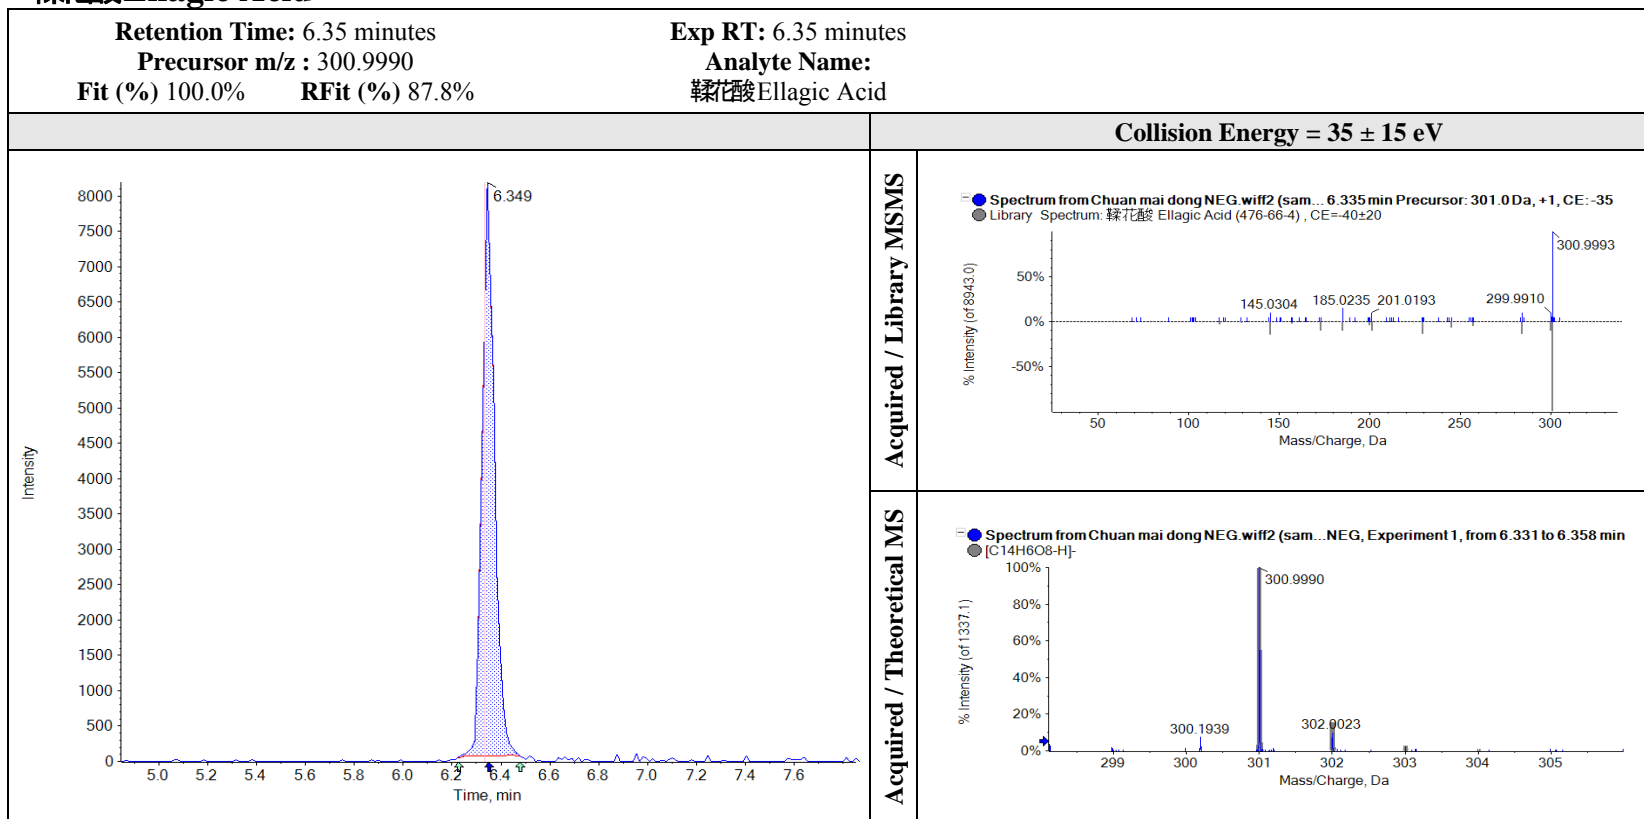

### 金丝桃苷 Hyperin

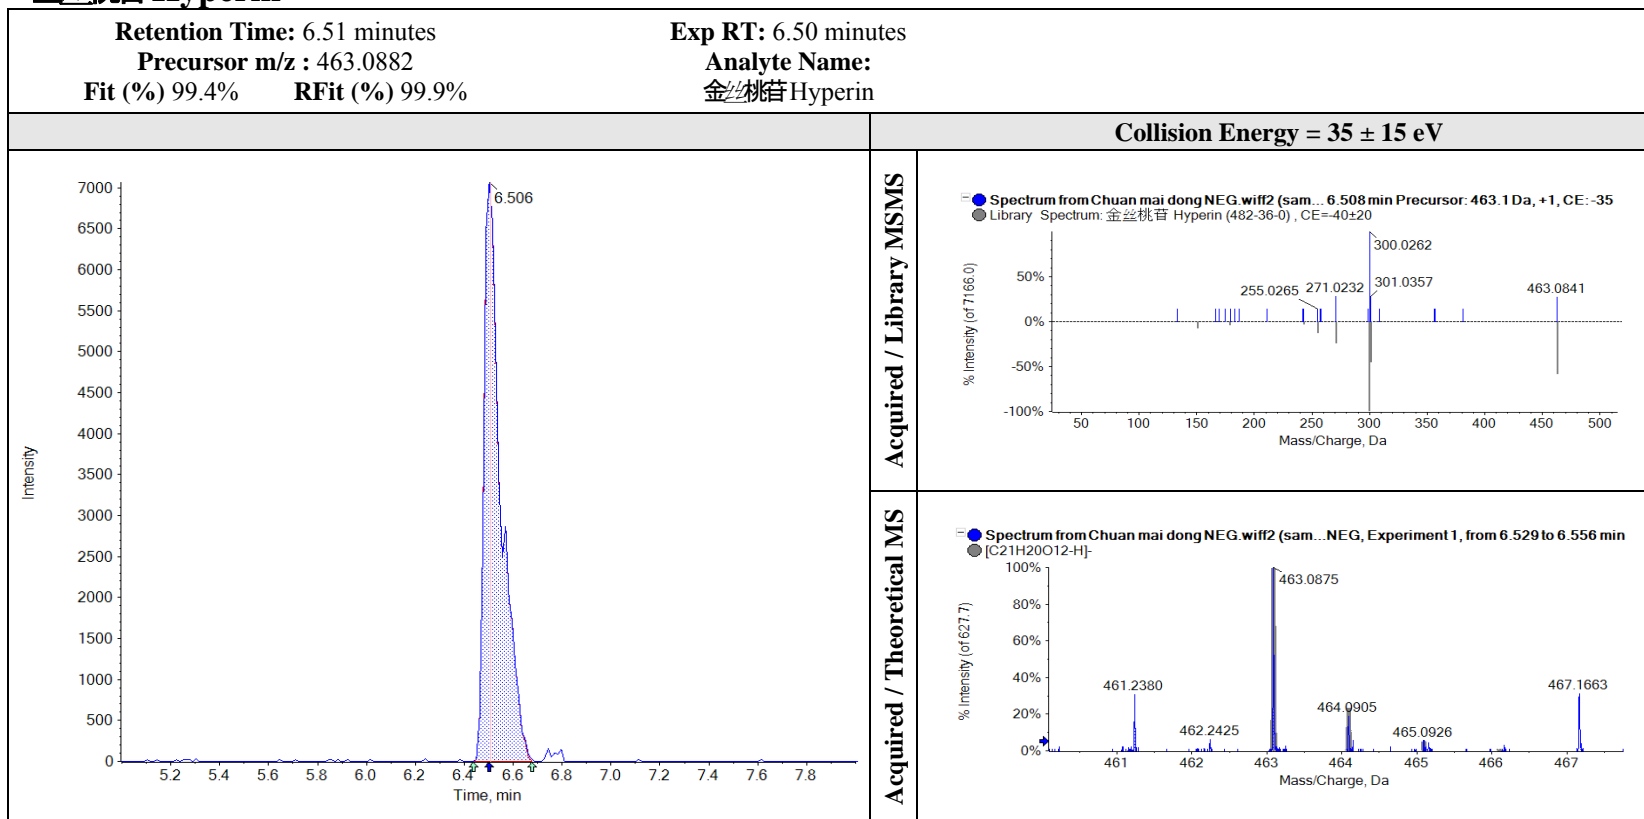

### 芸香柚皮苷 Narirutin

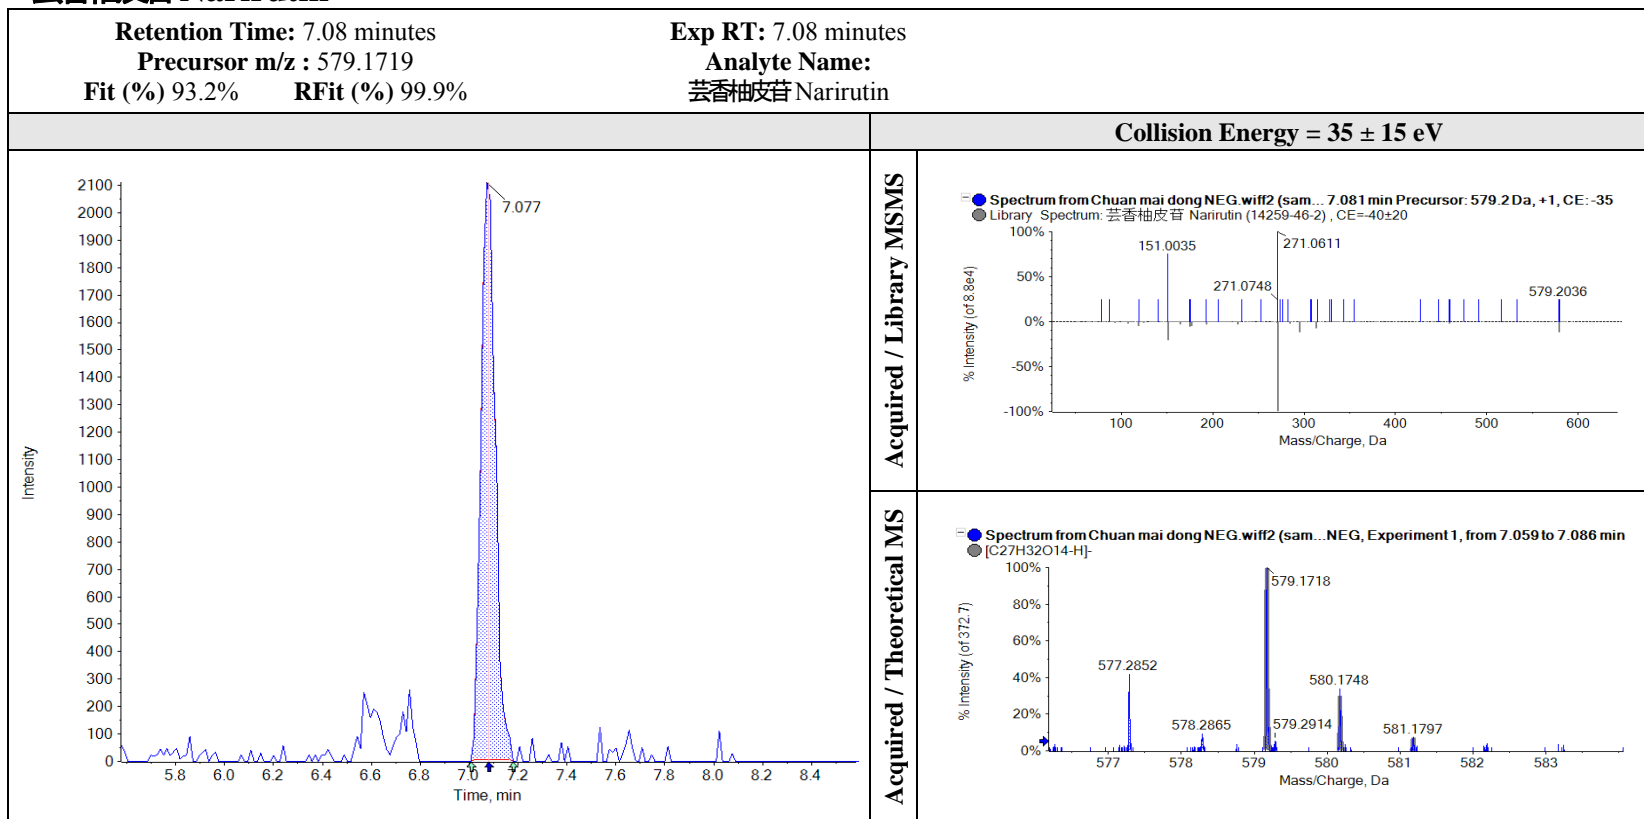

### 新橙皮苷 Neohesperidin

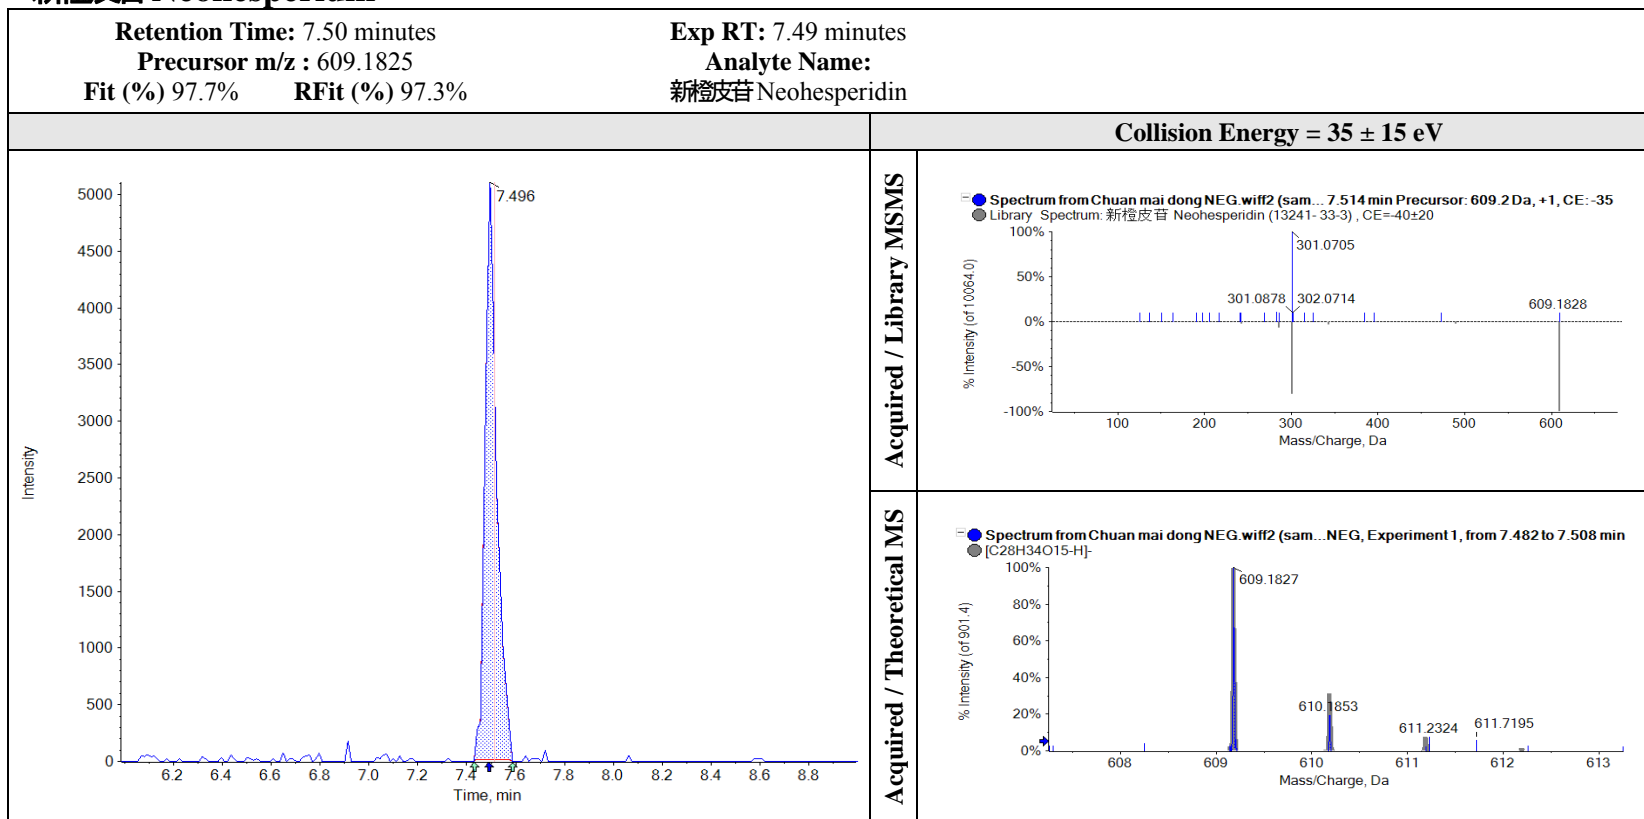

### 槲寄生 Tiliroside

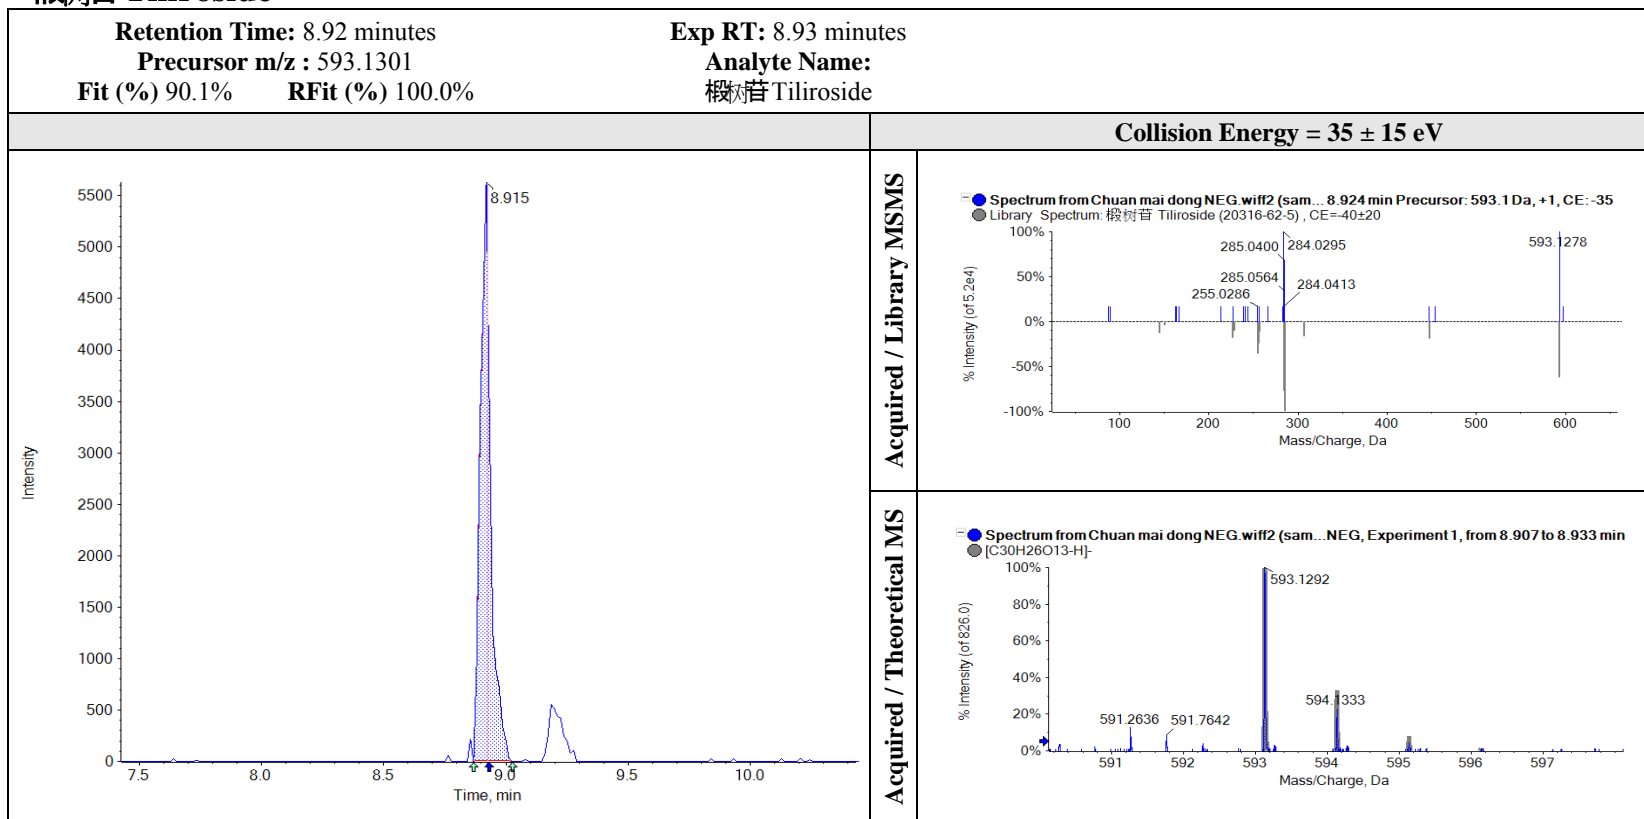



### 毛蕊异黄酮苷 Calycosin-7-o-glucoside

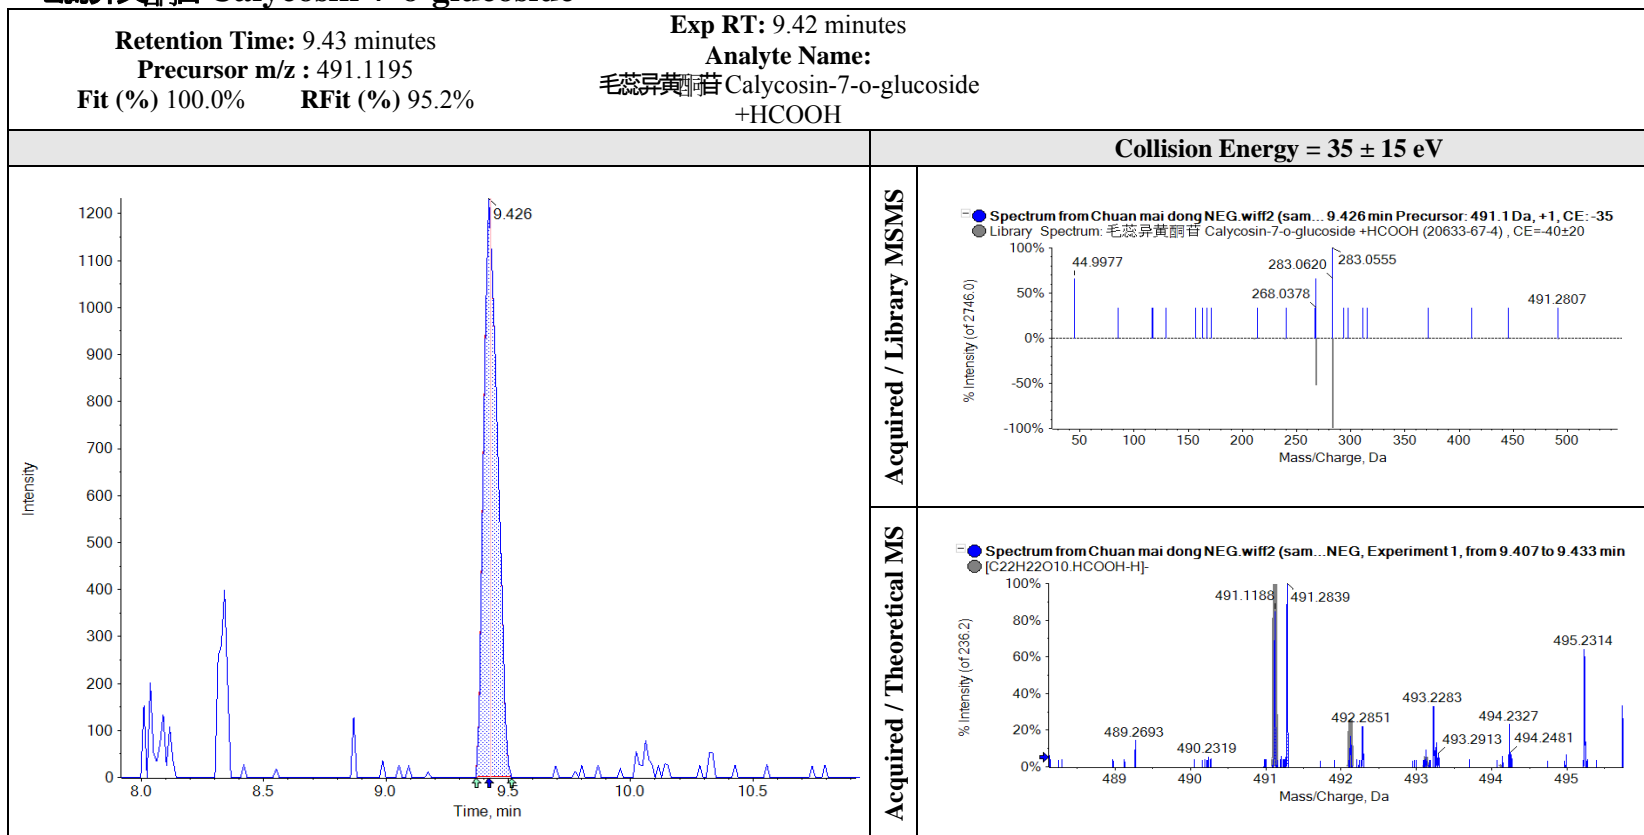

纤细薯蓣皂苷 Gracillin

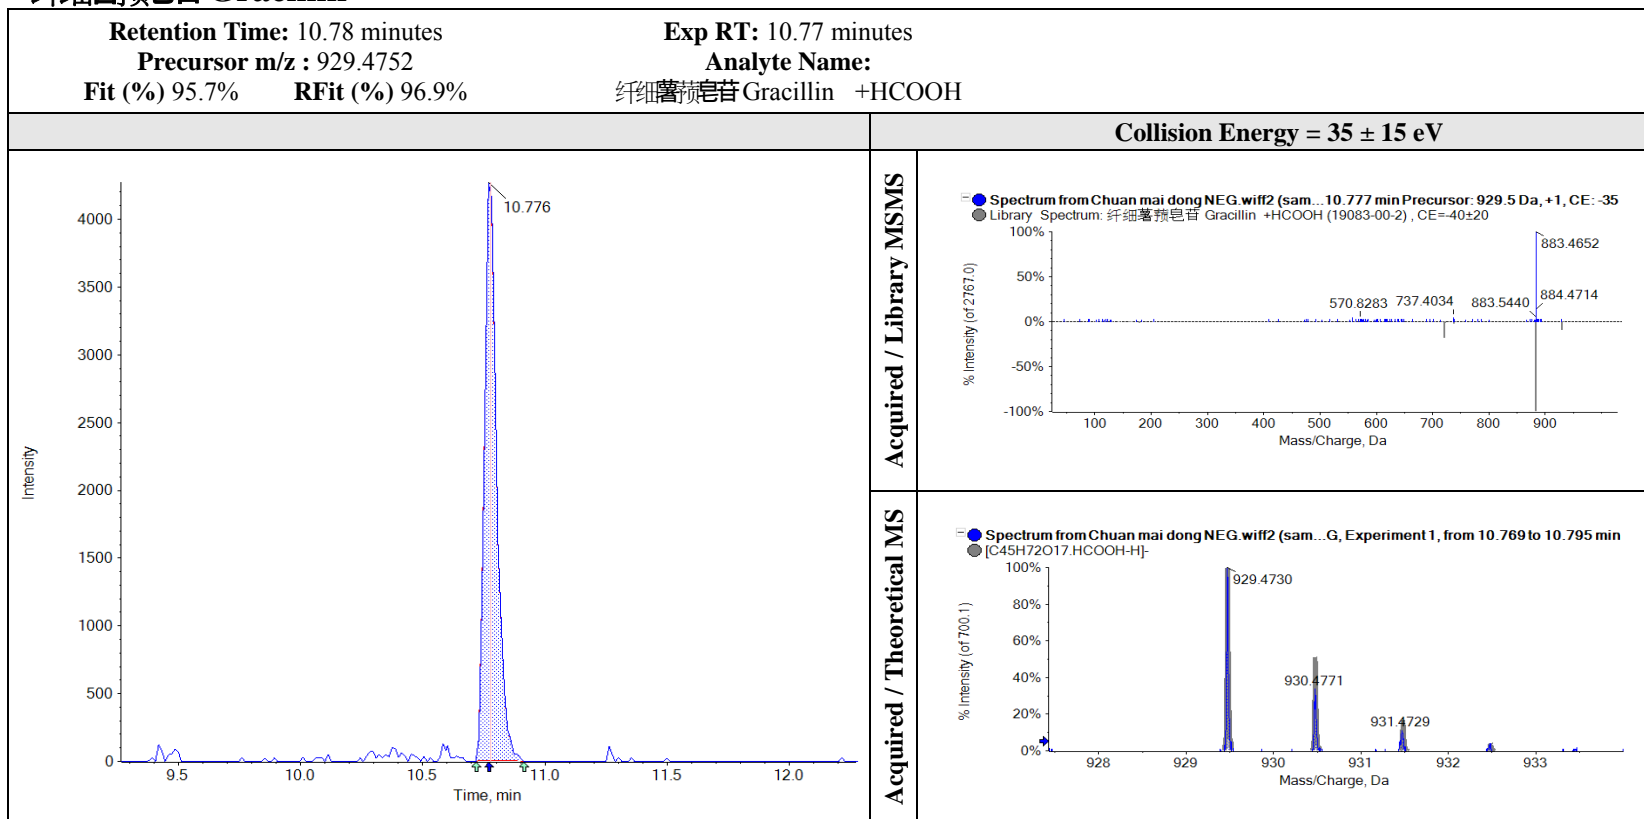

### 短葶山麦冬皂苷 C Liriope muscari baily saponins C

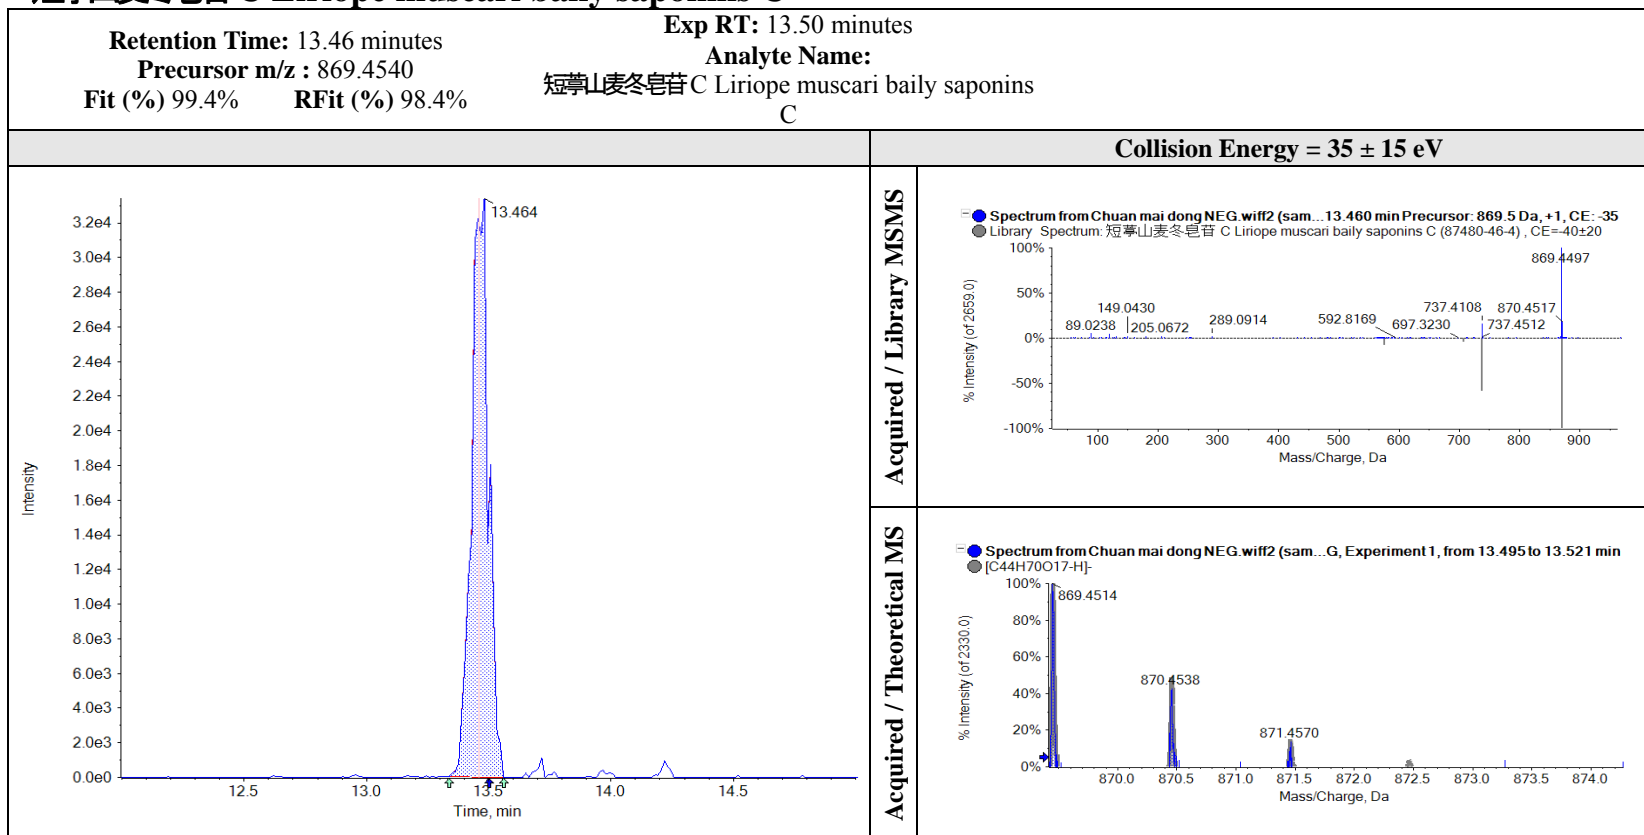

### 甲基麦冬高异黄酮A Methylophiopogonone A

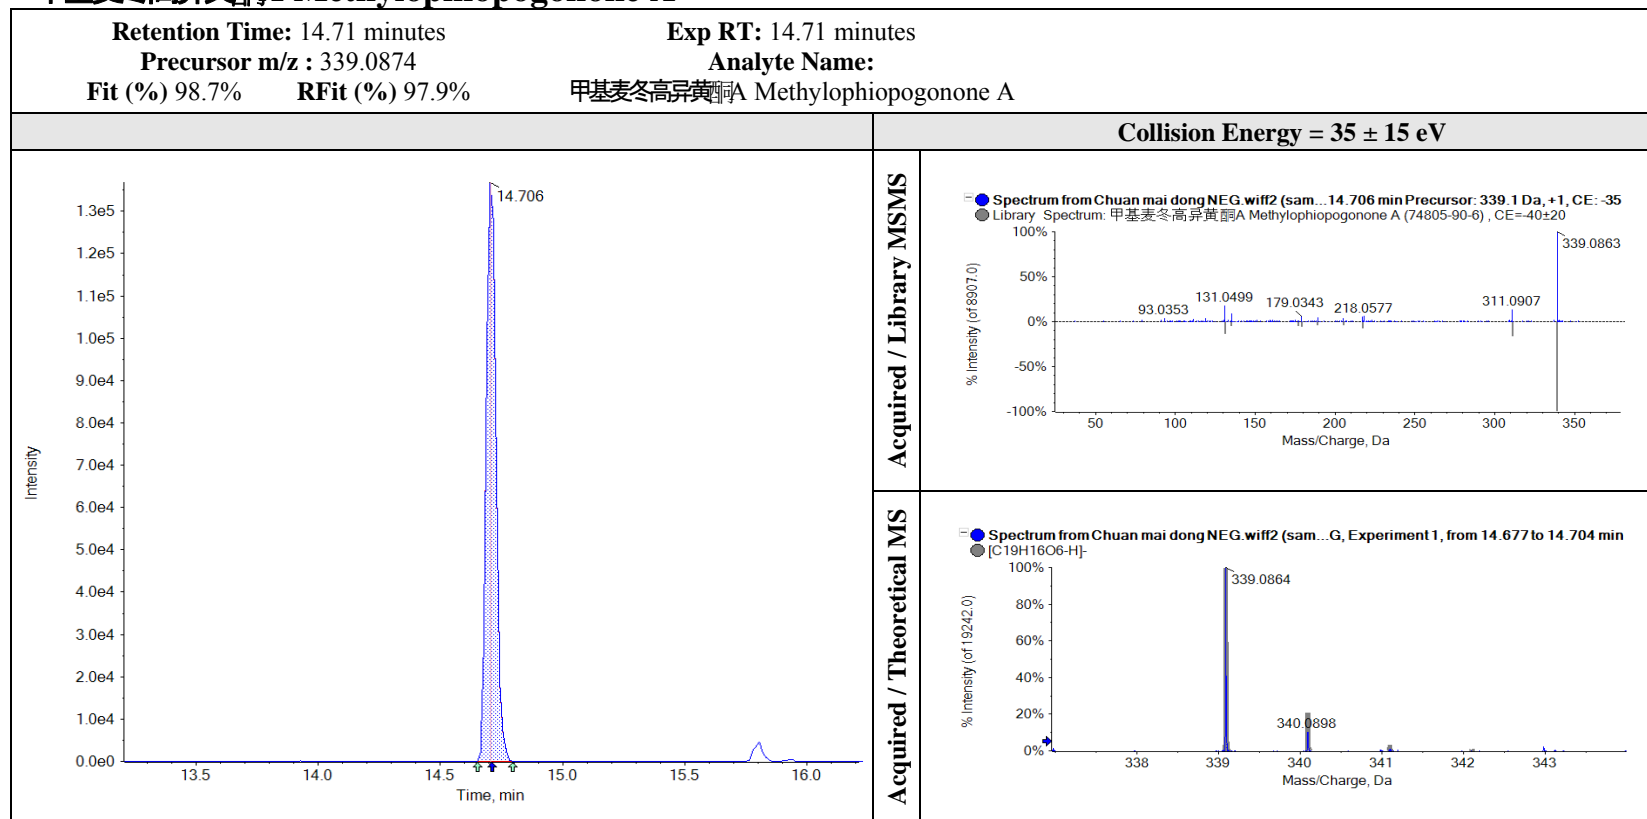

### 麦冬皂苷D Ophiopogonin D

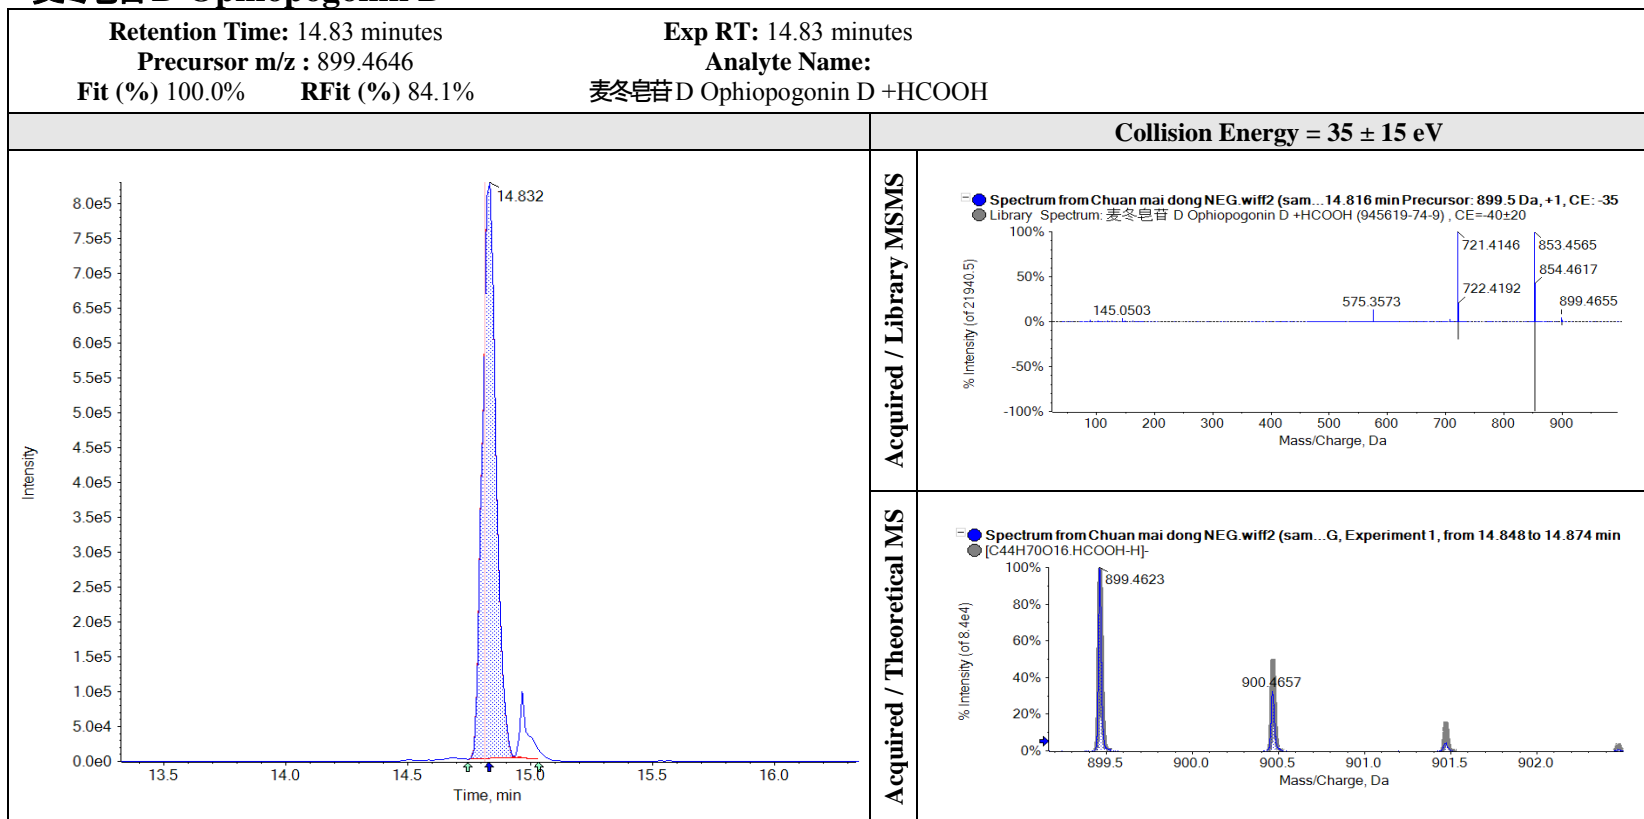

### 甲基麦冬二氢高异黄酮B Methylophiopogonanone B

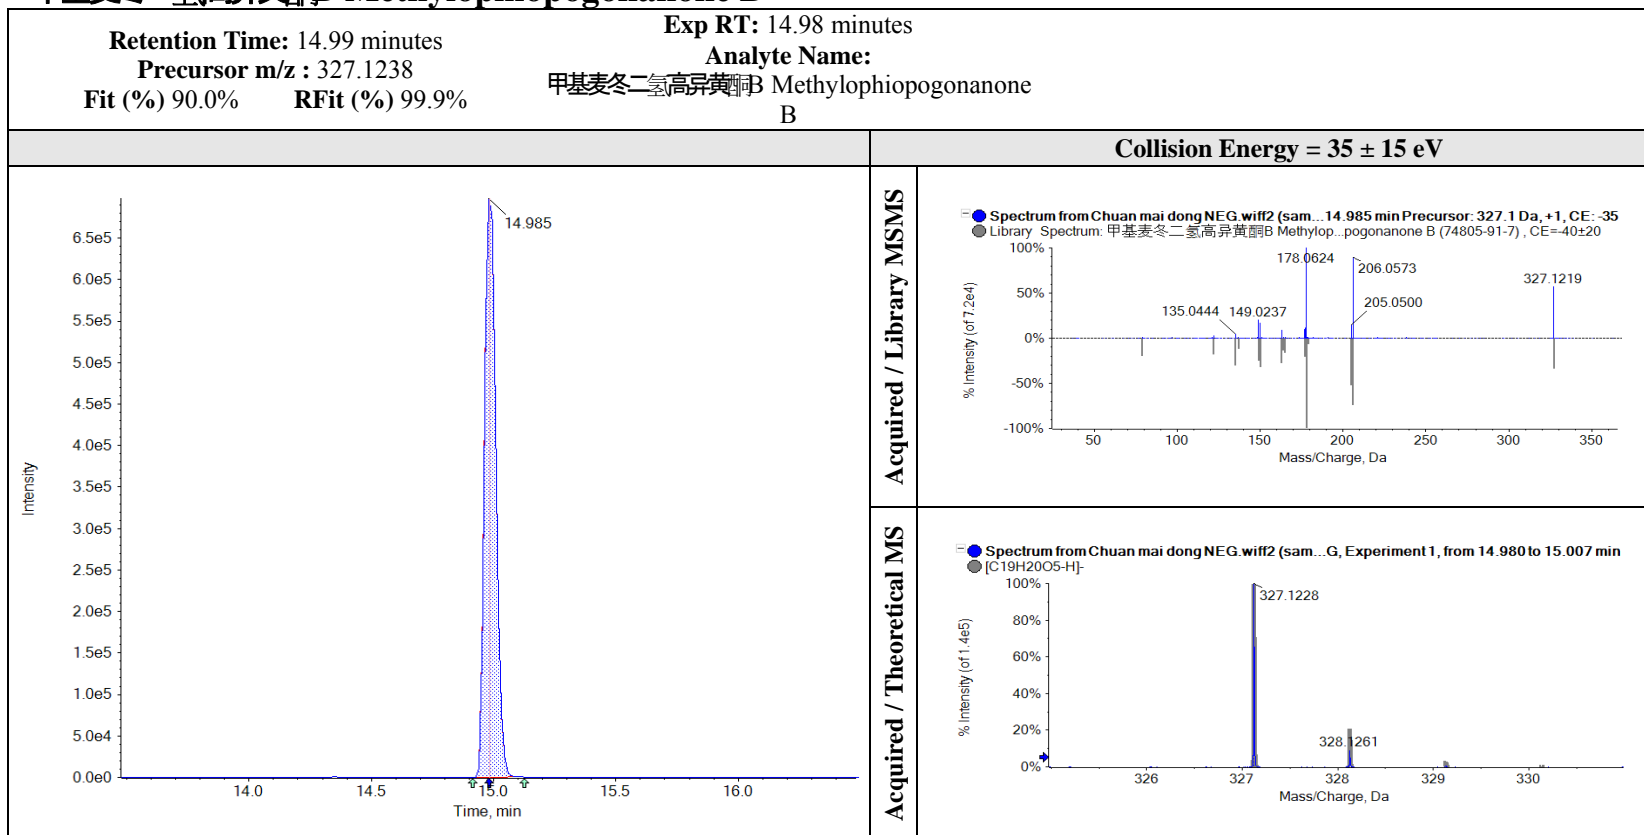

### 山麦冬皂苷 B Liriopesides B

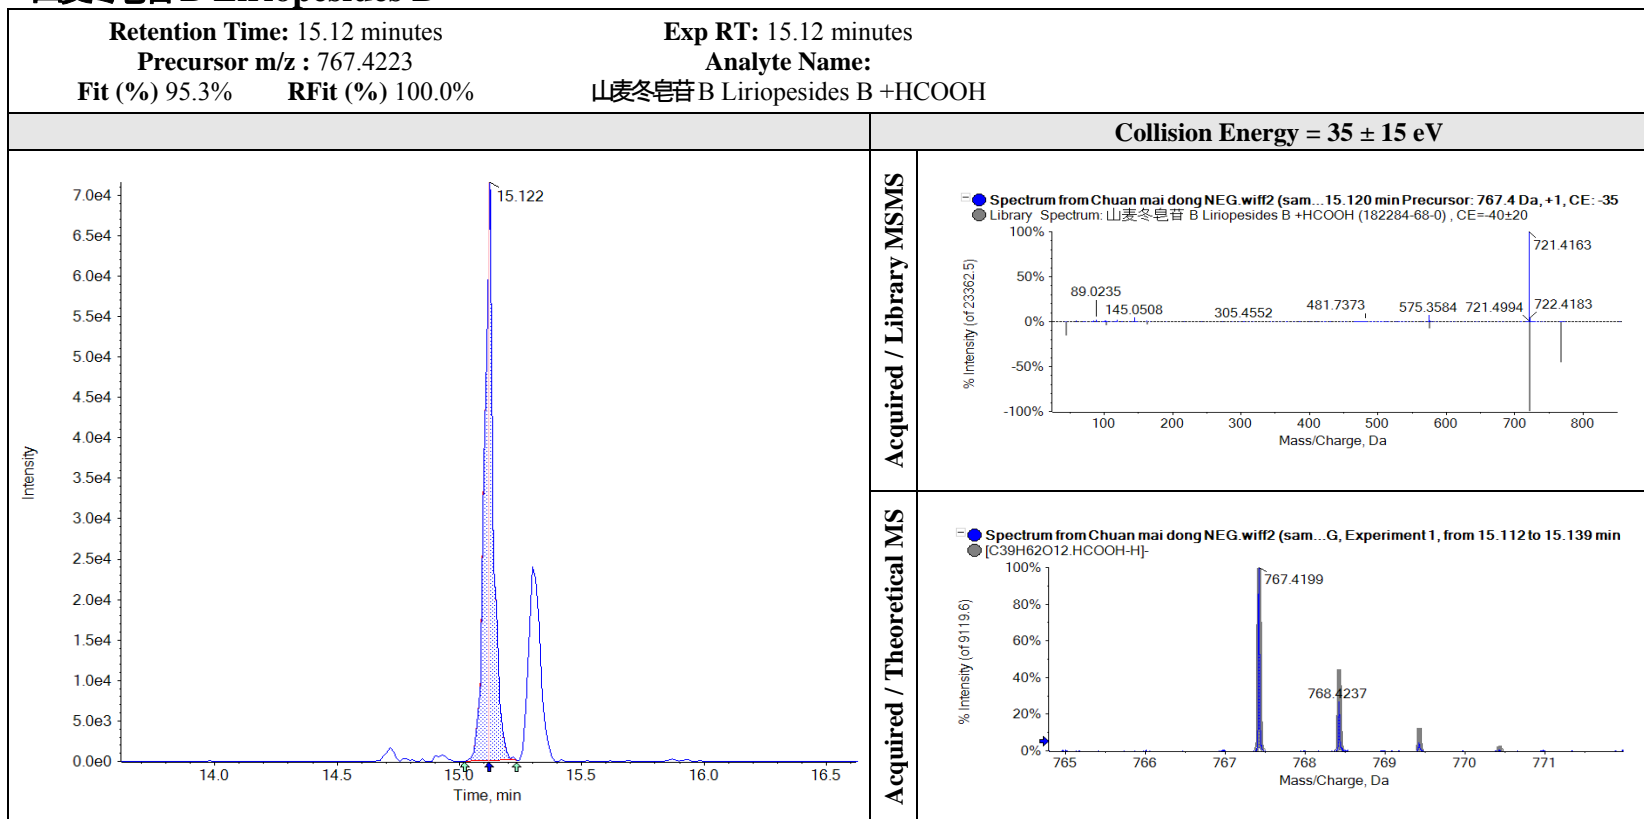

### 姜糖苷B Gingerglycolipid B

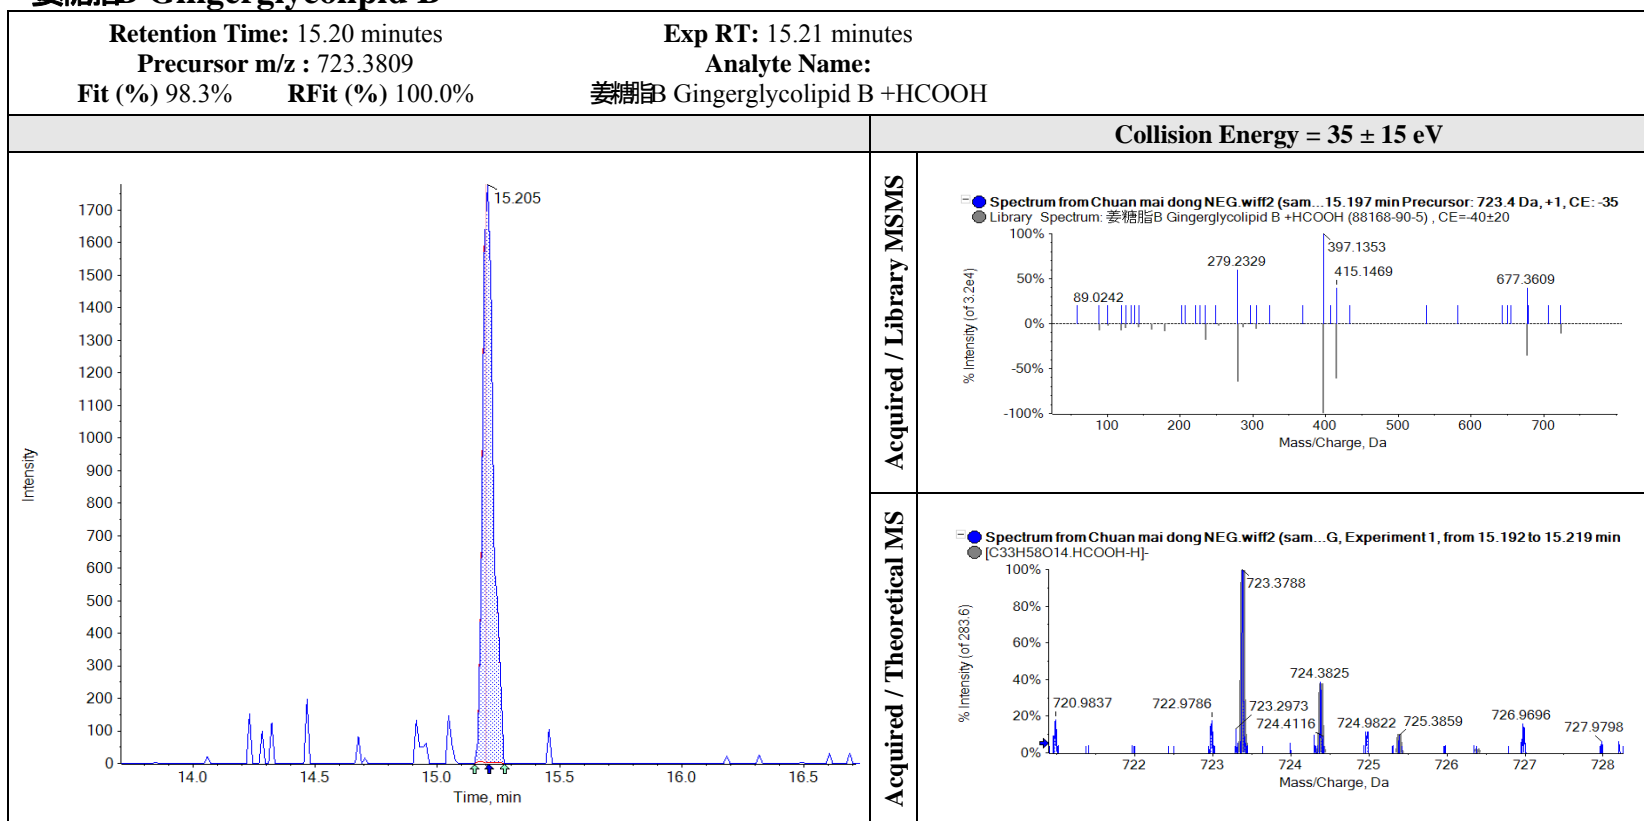



### 科罗素酸 Corosolic acid

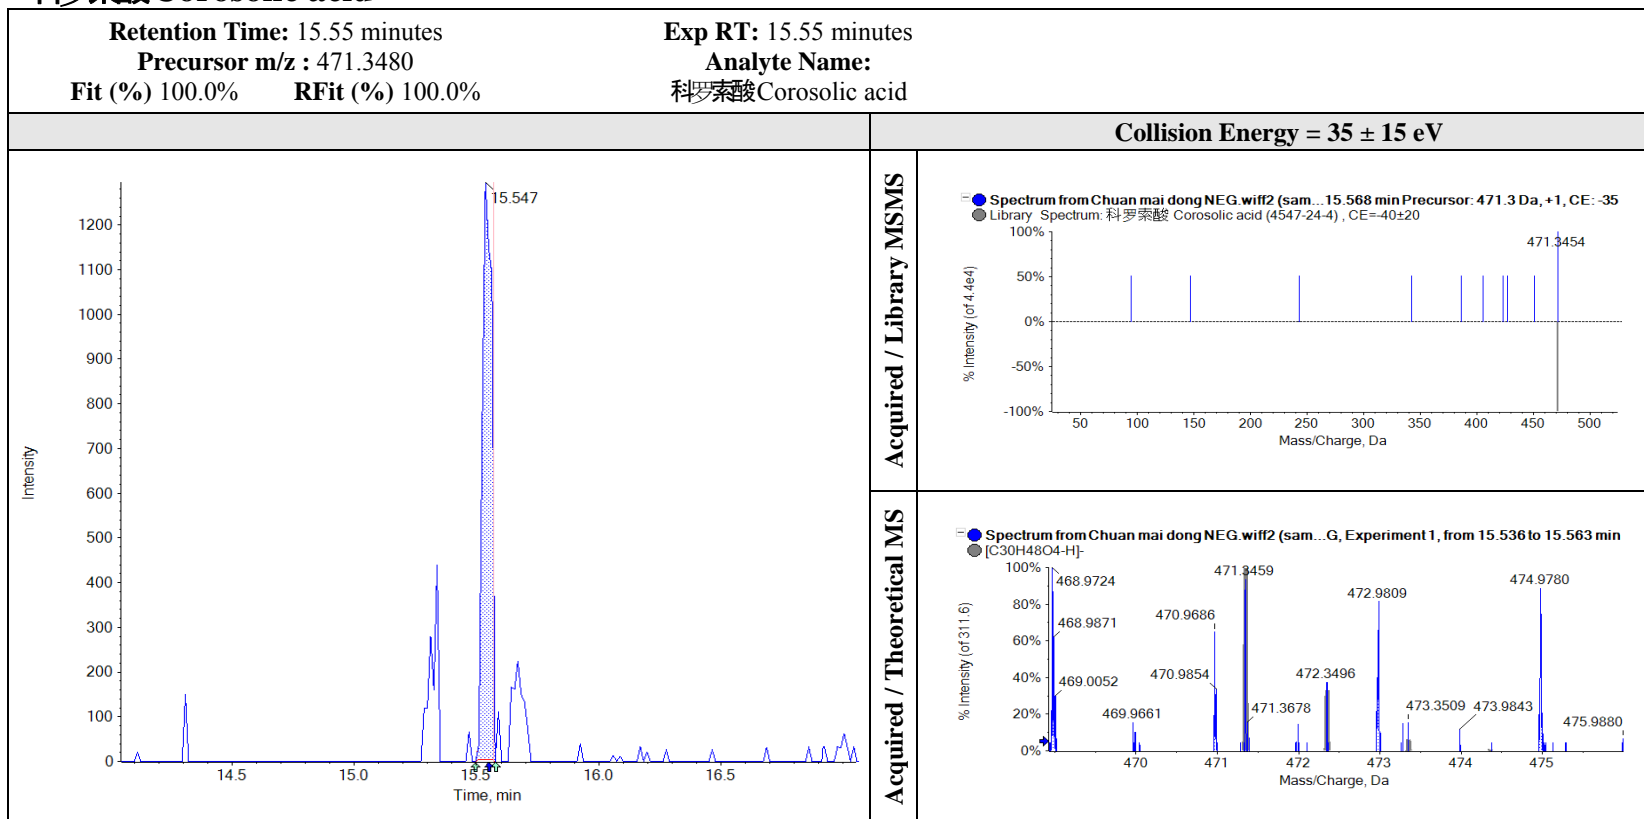

### 麦冬黄烷酮C Ophiopogonanone C

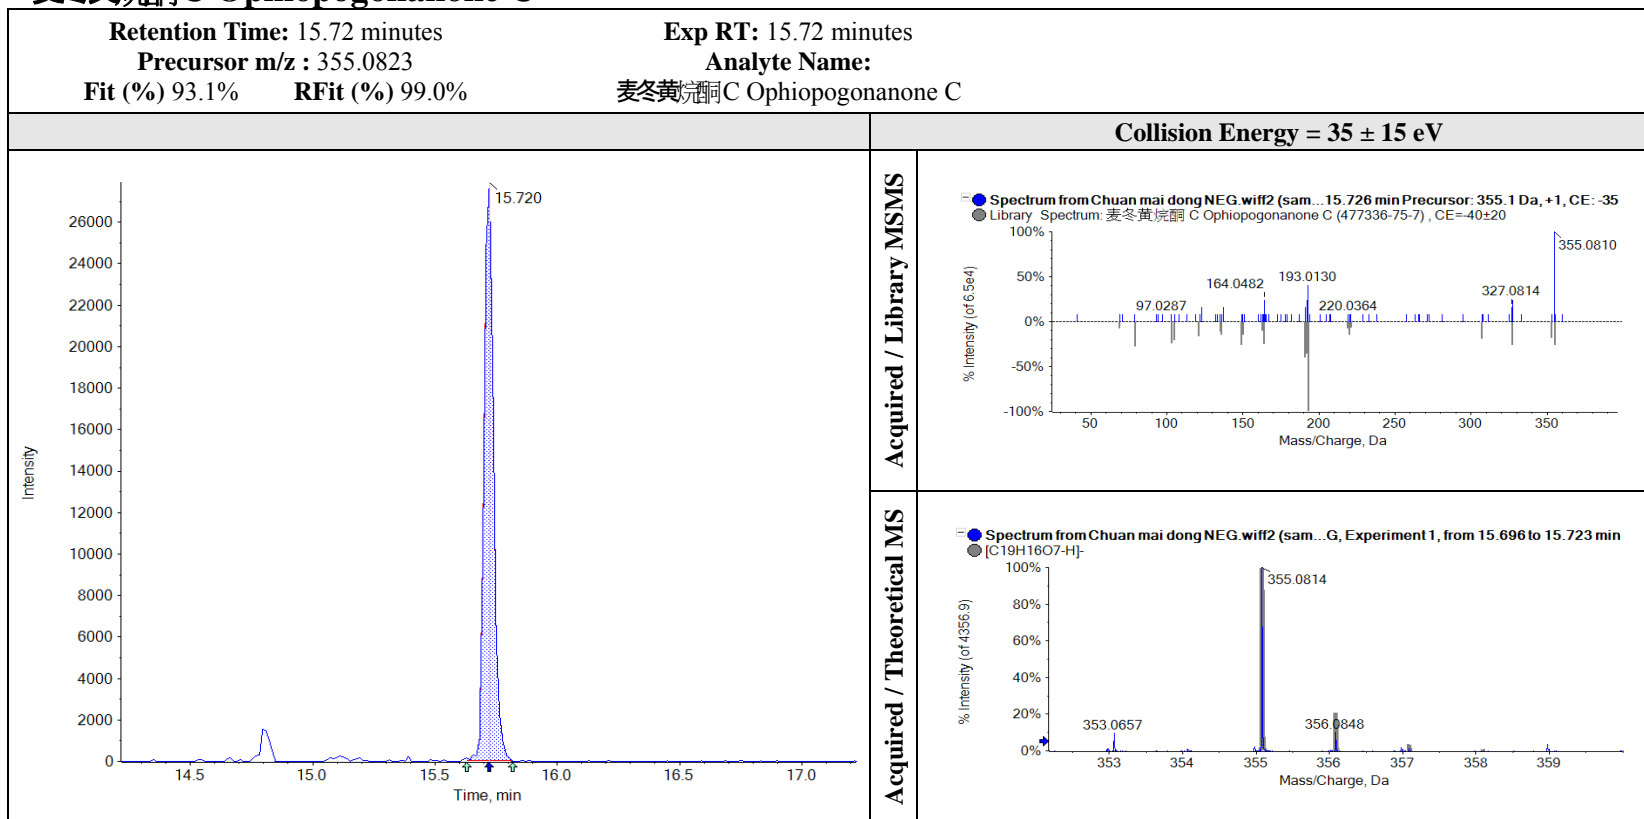

**Table S2 MS fragmentation pathways for representative compounds of ZMD in UPLC-Q/TOF-MS analysis**

**MS fragmentation pathways for different chemical constituents of ZMD in positive ion mode**

**精氨酸 L(+)-Arginine**

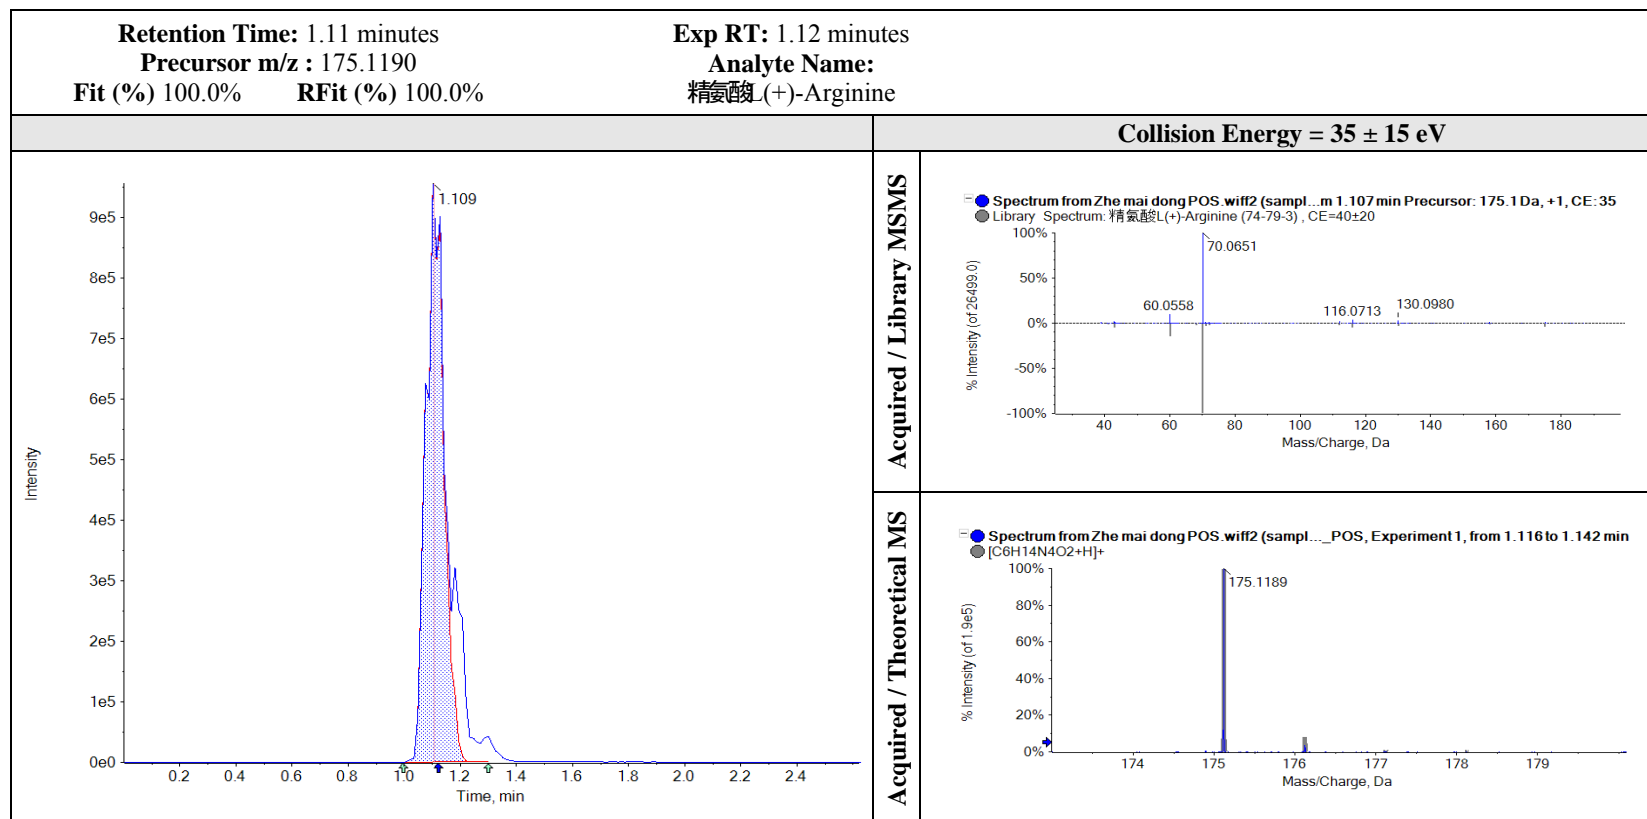

### 胡芦巴碱 Trigonelline

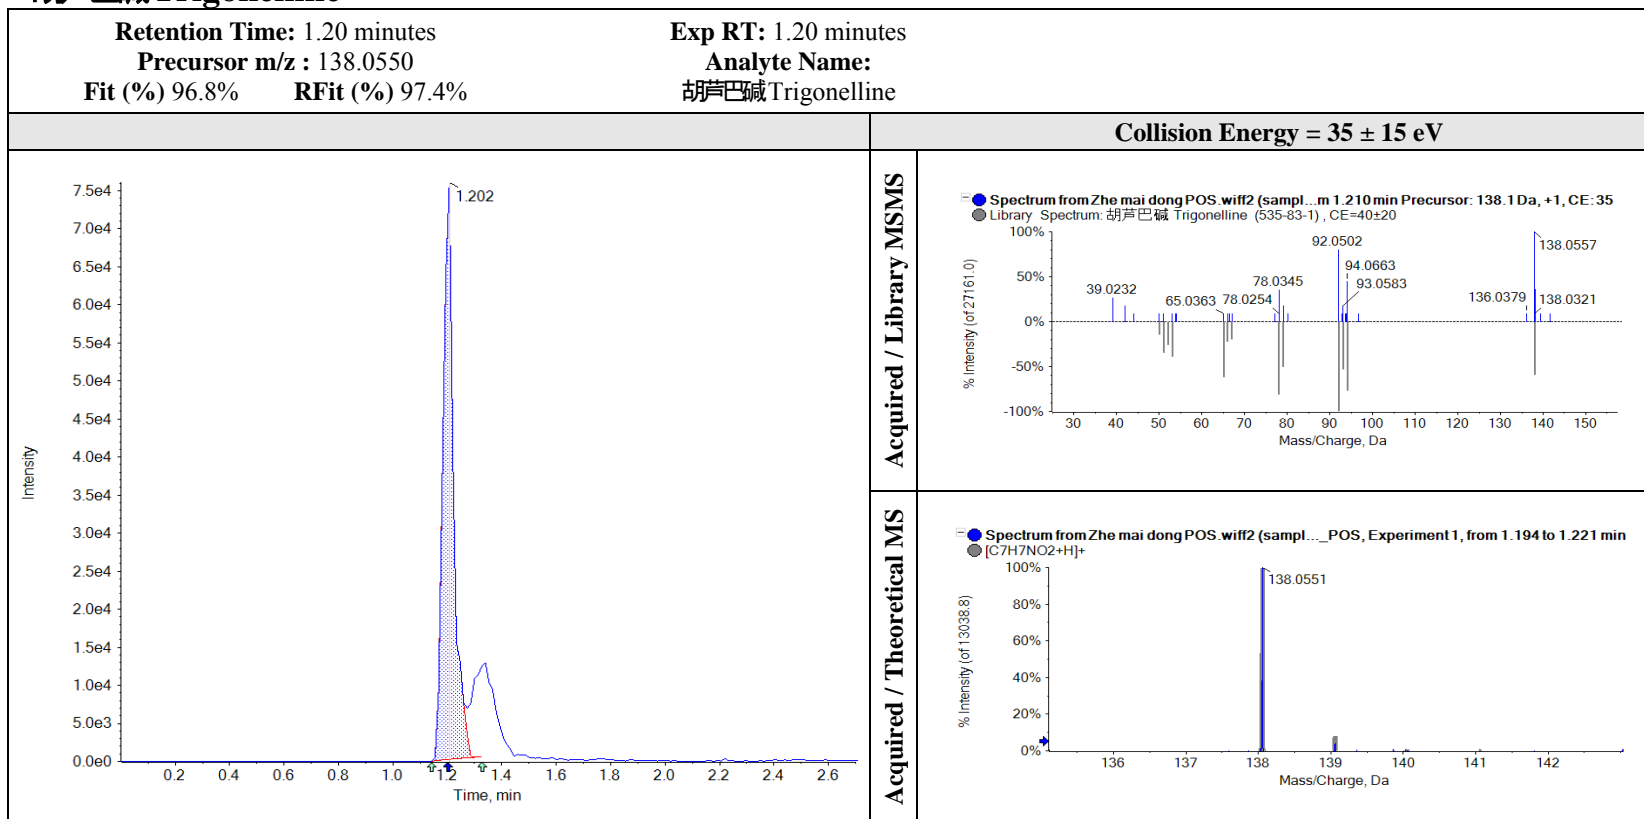

### 脯氨酸 Proline

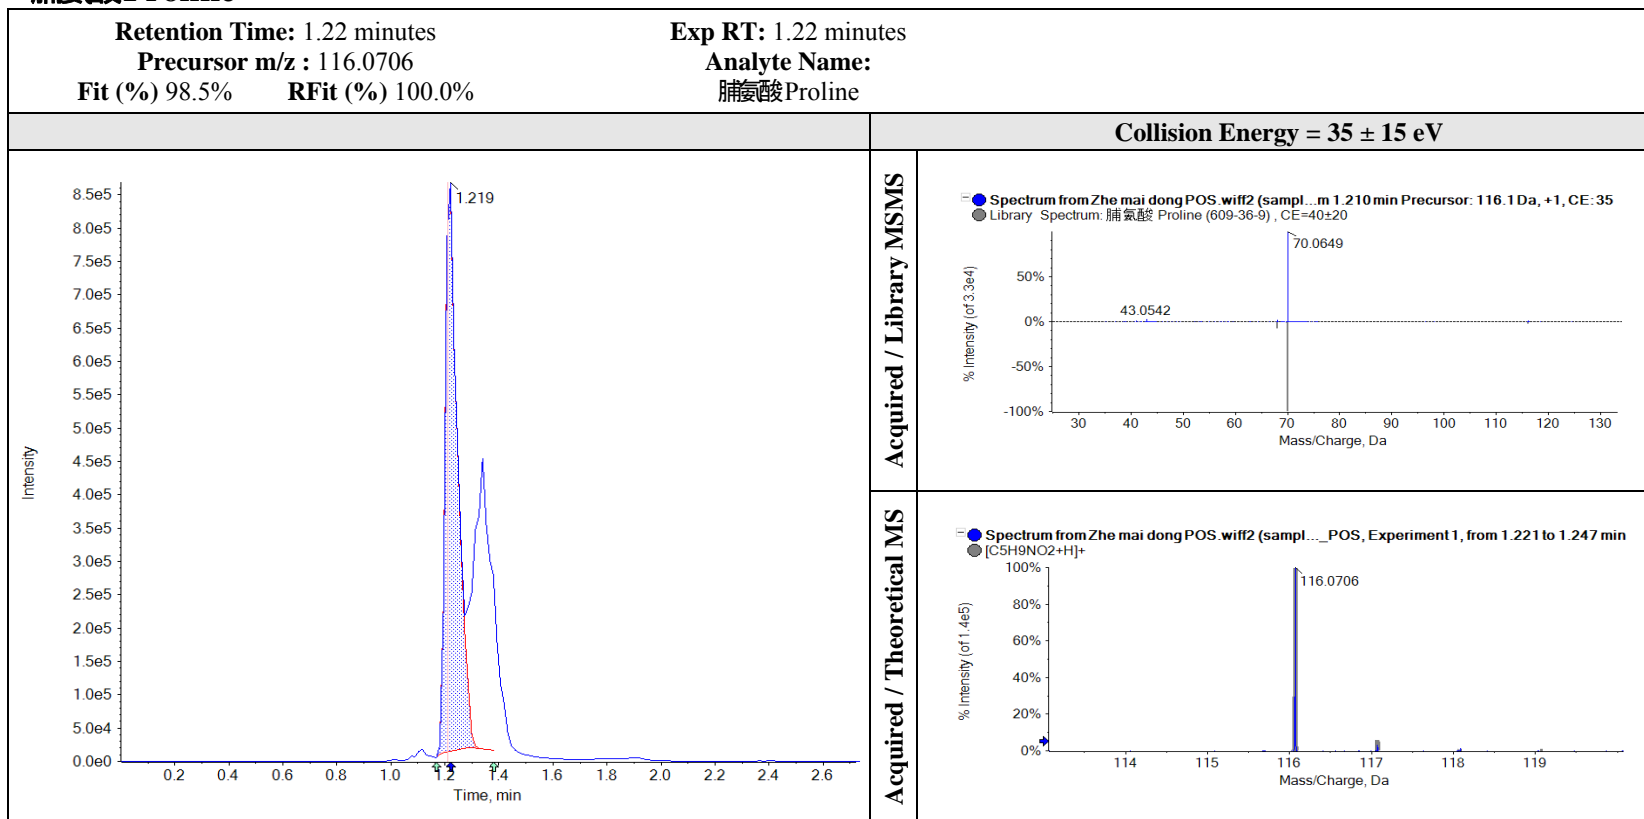

### 烟酸 Nicotinic acid

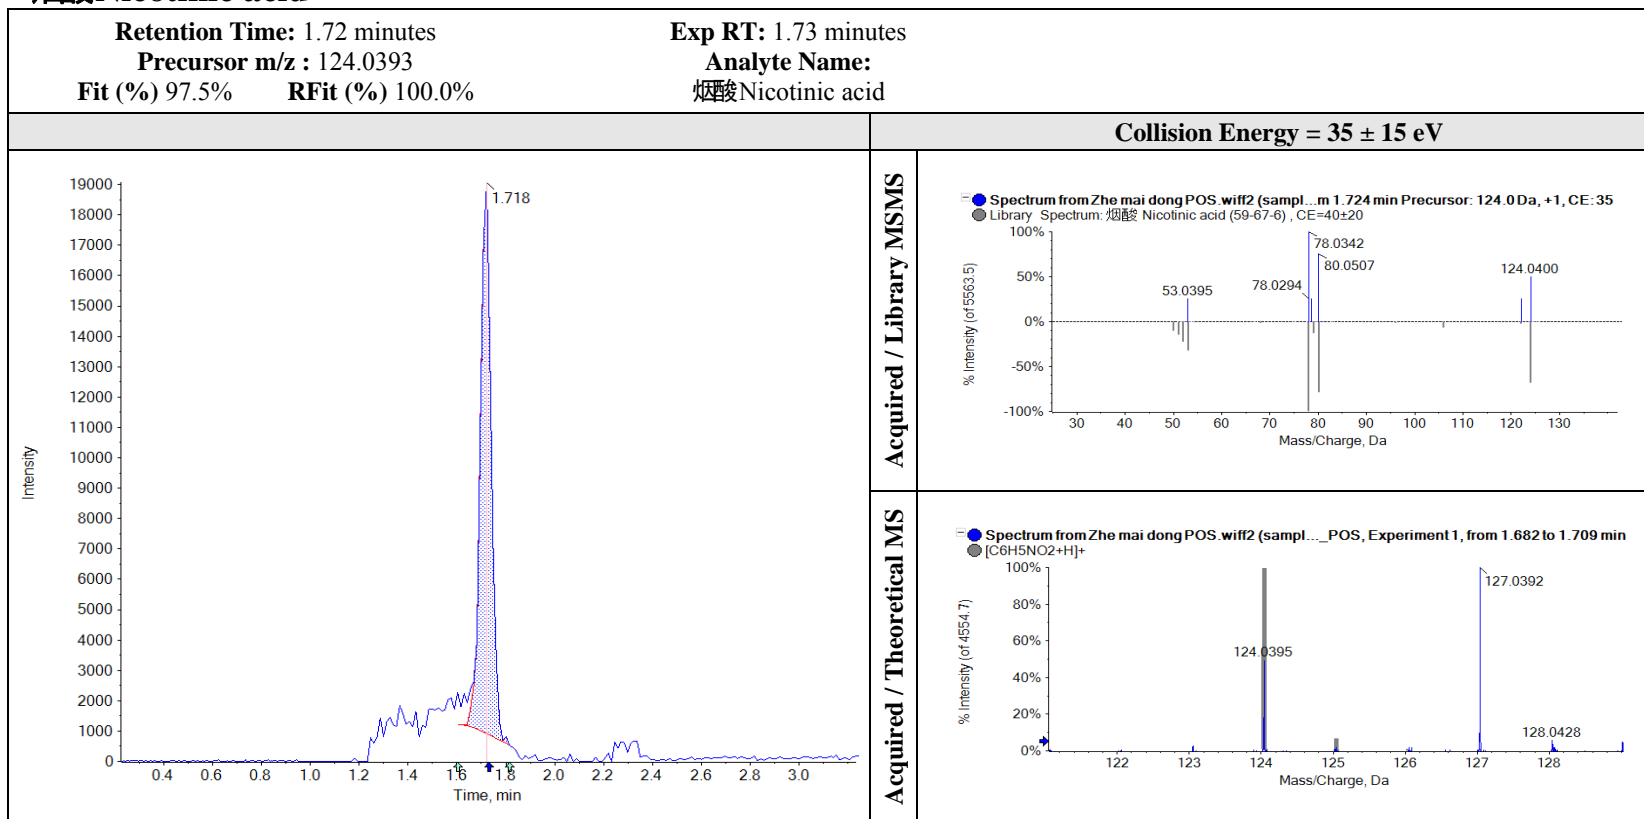

### 烟酰胺 Nicotinamide

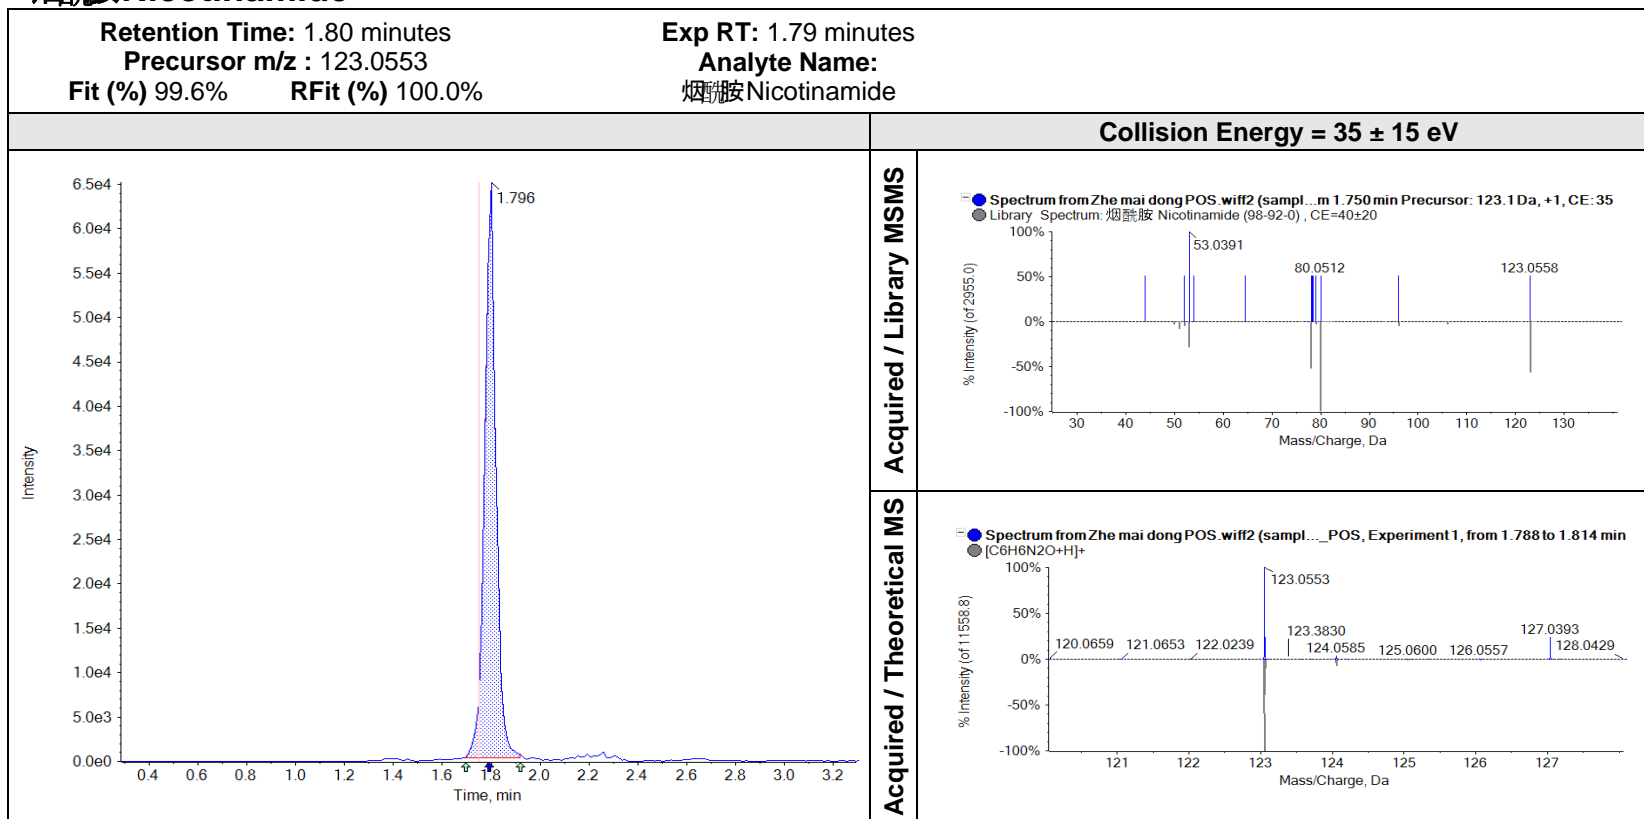

### 腺苷 Adenosine

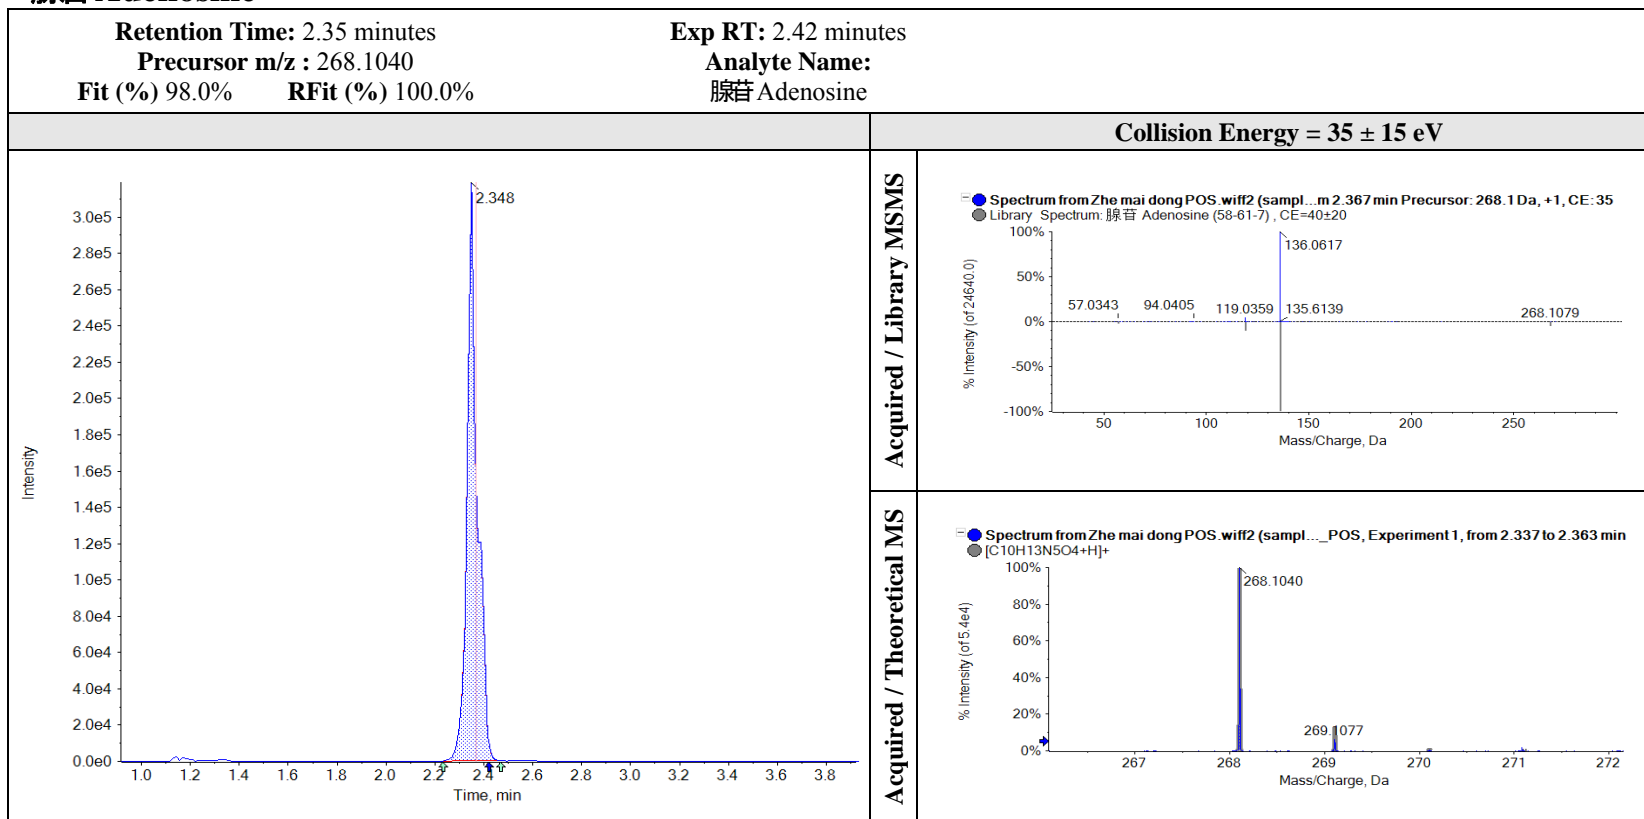



### 虫草素 Cordycepin

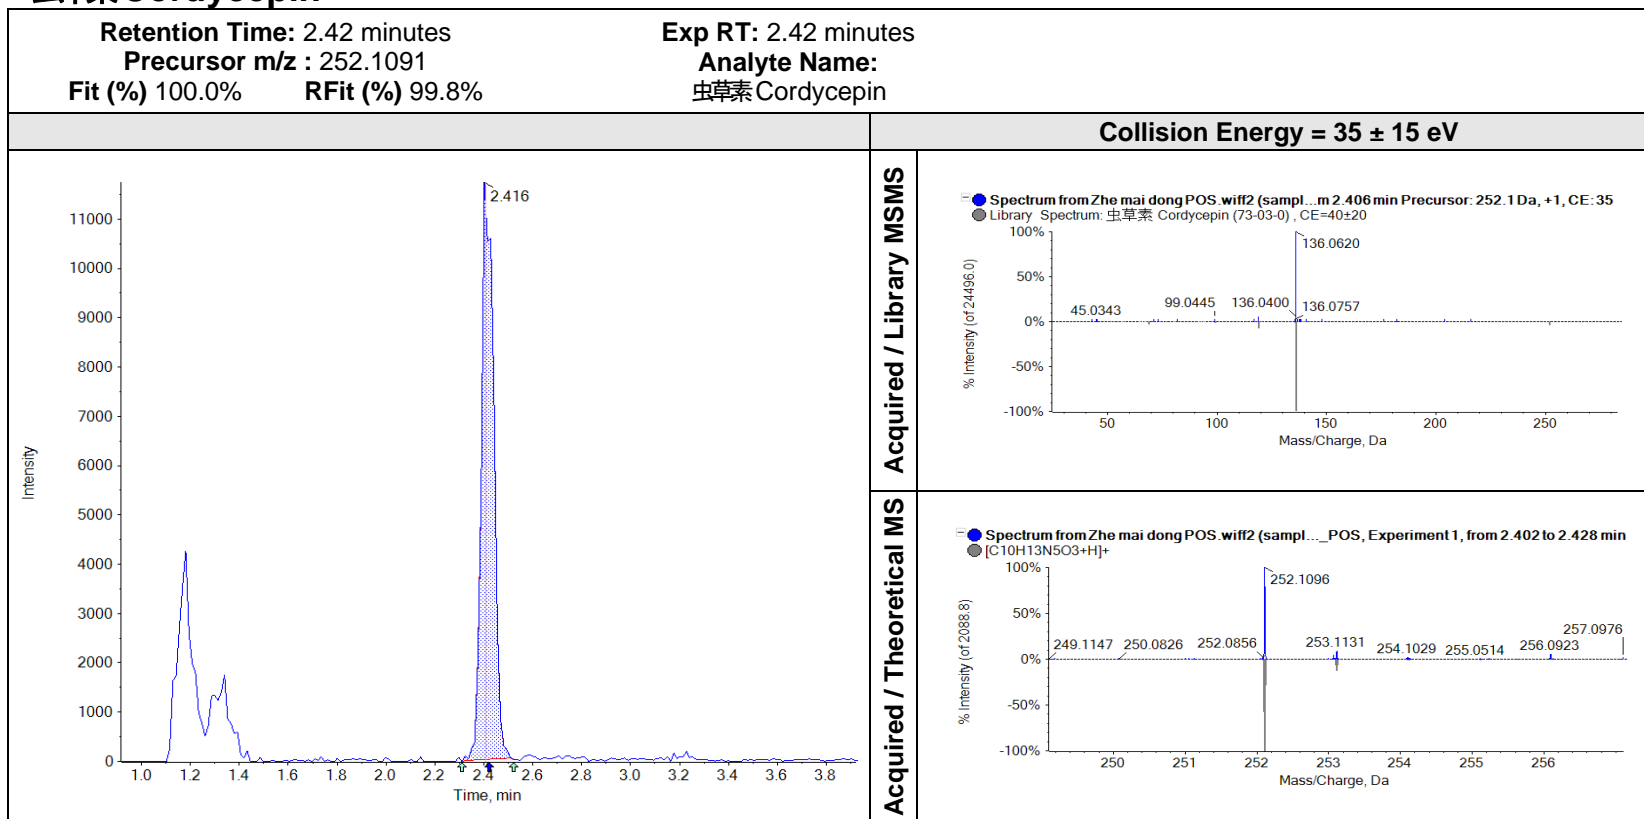

### 异亮氨酸 Isoleucine

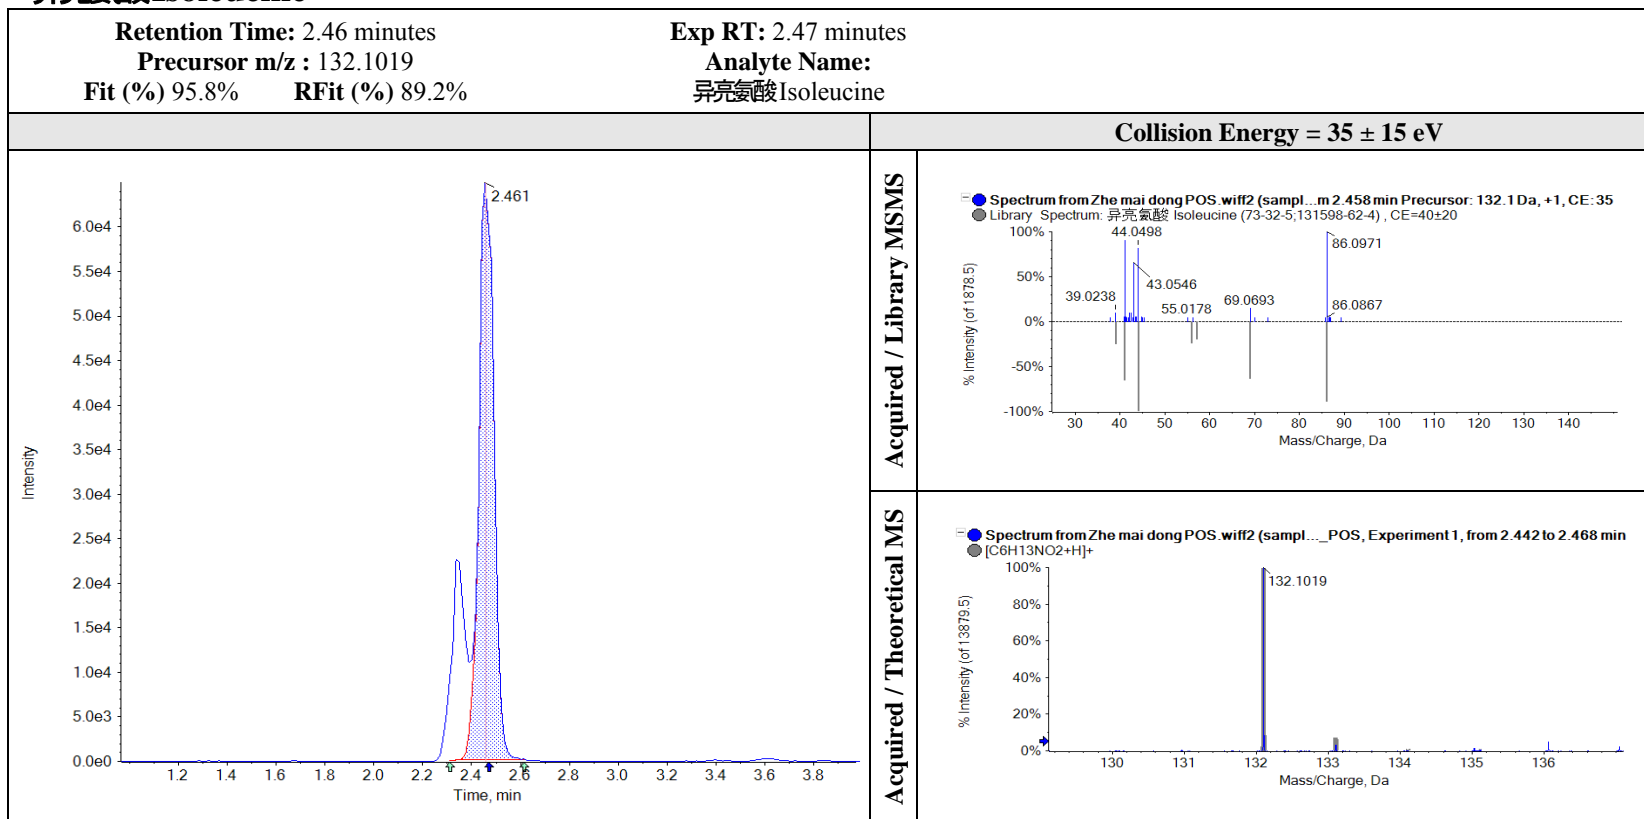

### 鸟苷 Guanosine

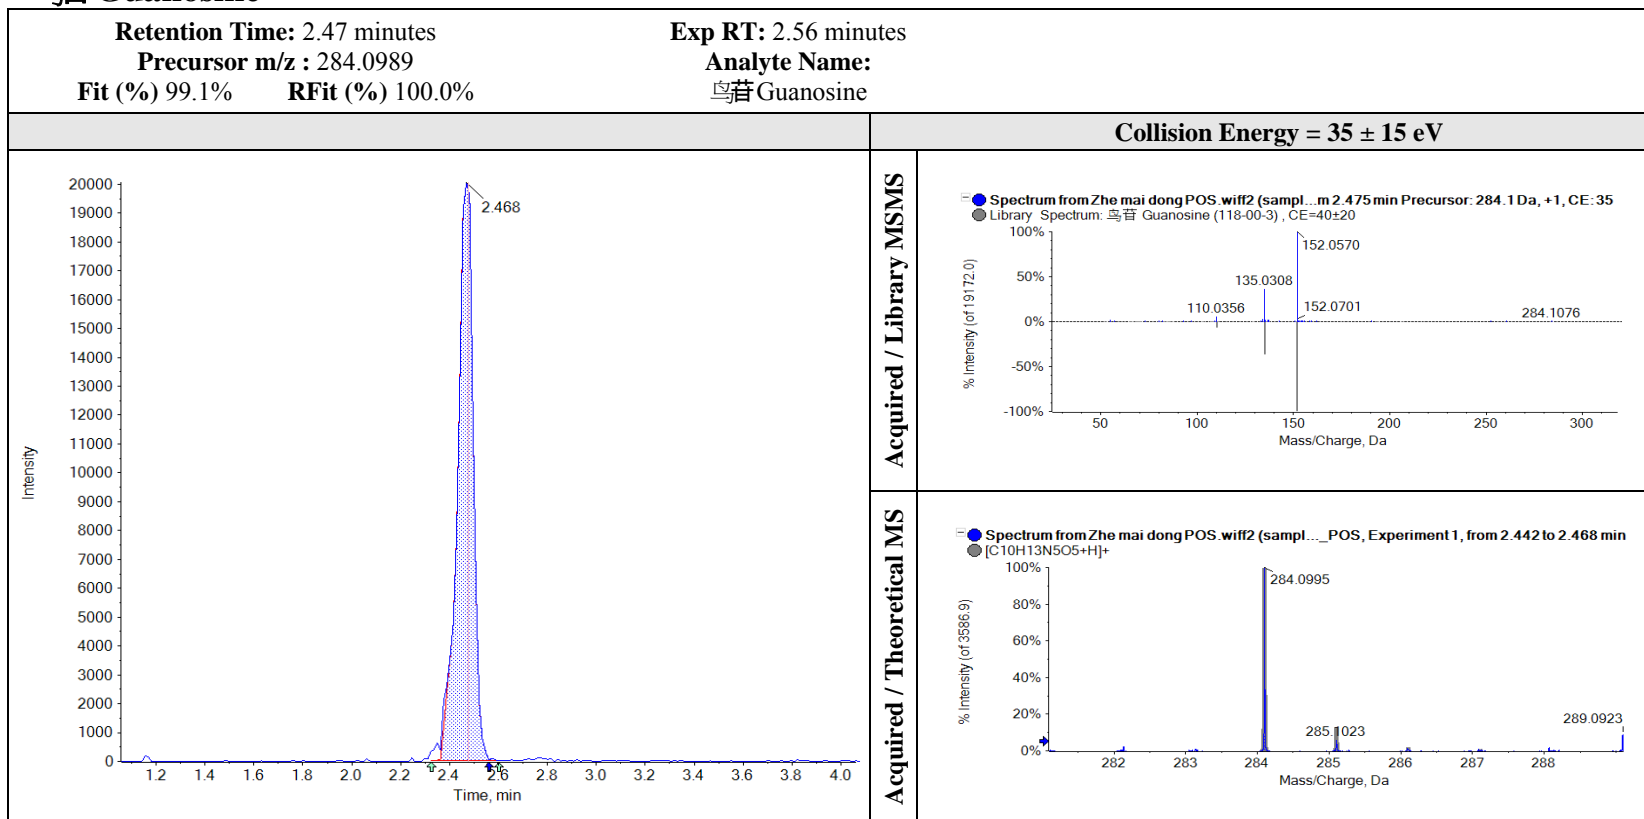

### 苯丙氨酸 Phenprobamate

|                                                                                                                                                                                                                              |                                       |
|------------------------------------------------------------------------------------------------------------------------------------------------------------------------------------------------------------------------------|---------------------------------------|
| <p><b>Retention Time:</b> 3.17 minutes      <b>Exp RT:</b> 3.31 minutes</p> <p><b>Precursor m/z :</b> 166.0863      <b>Analyte Name:</b></p> <p><b>Fit (%)</b> 96.9%      <b>RFit (%)</b> 100.0%      苯丙氨酸 Phenprobamate</p> |                                       |
| <p><b>Collision Energy = 35 ± 15 eV</b></p>                                                                                                                                                                                  |                                       |
|                                                                                                                                                                                                                              | <p><b>Acquired / Library MSMS</b></p> |
|                                                                                                                                                                                                                              |                                       |
| <p><b>Acquired / Theoretical MS</b></p>                                                                                                                                                                                      |                                       |

**绿原酸 Chlorogenic acid**

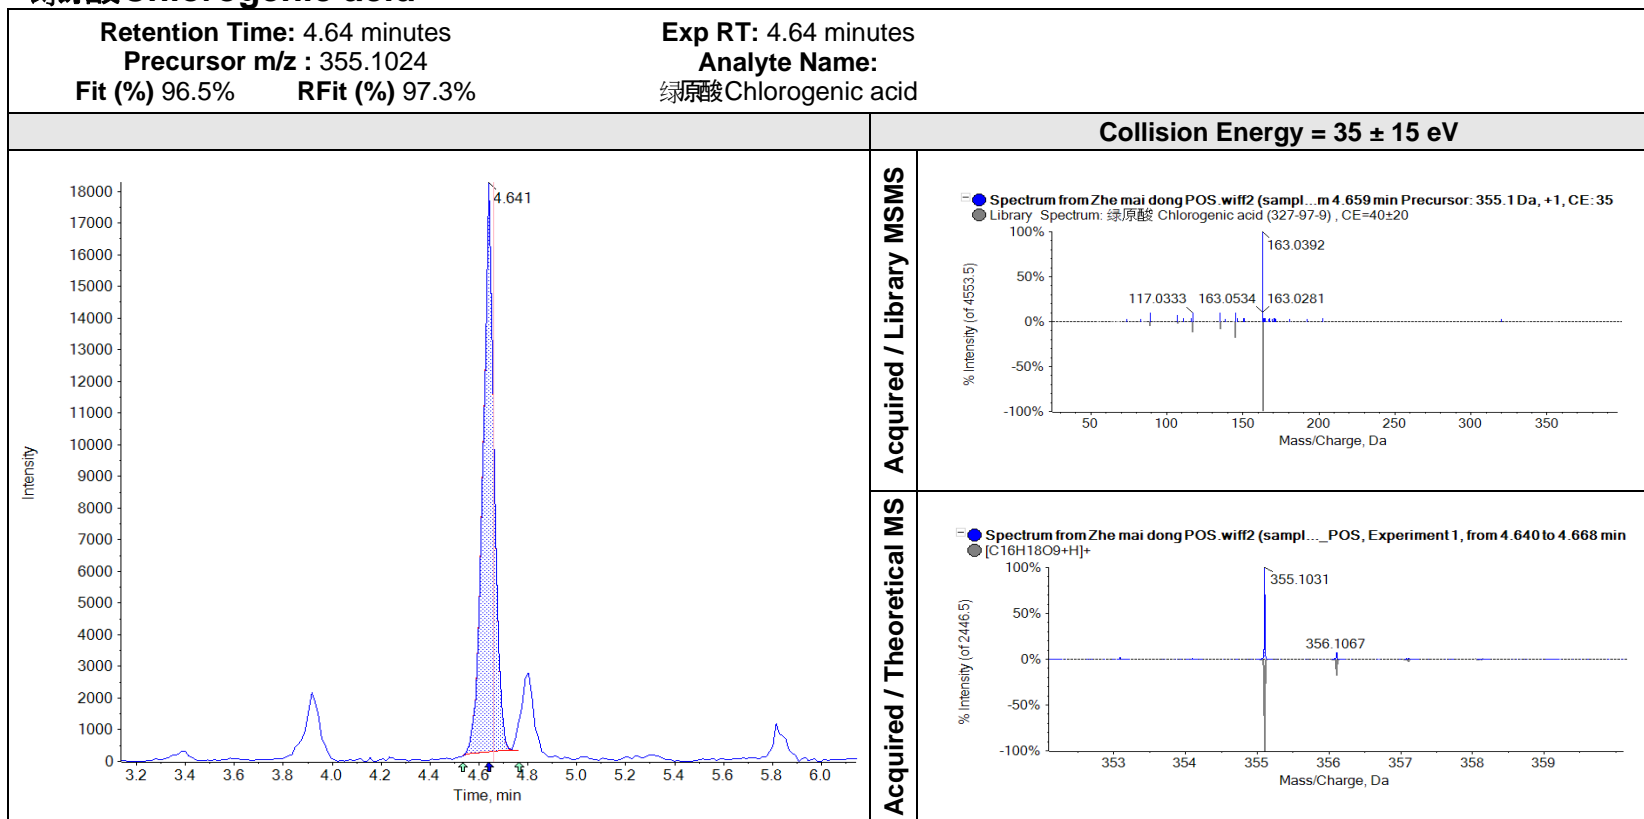

**对羟基苯甲酸 4-Hydroxybenzoic acid**

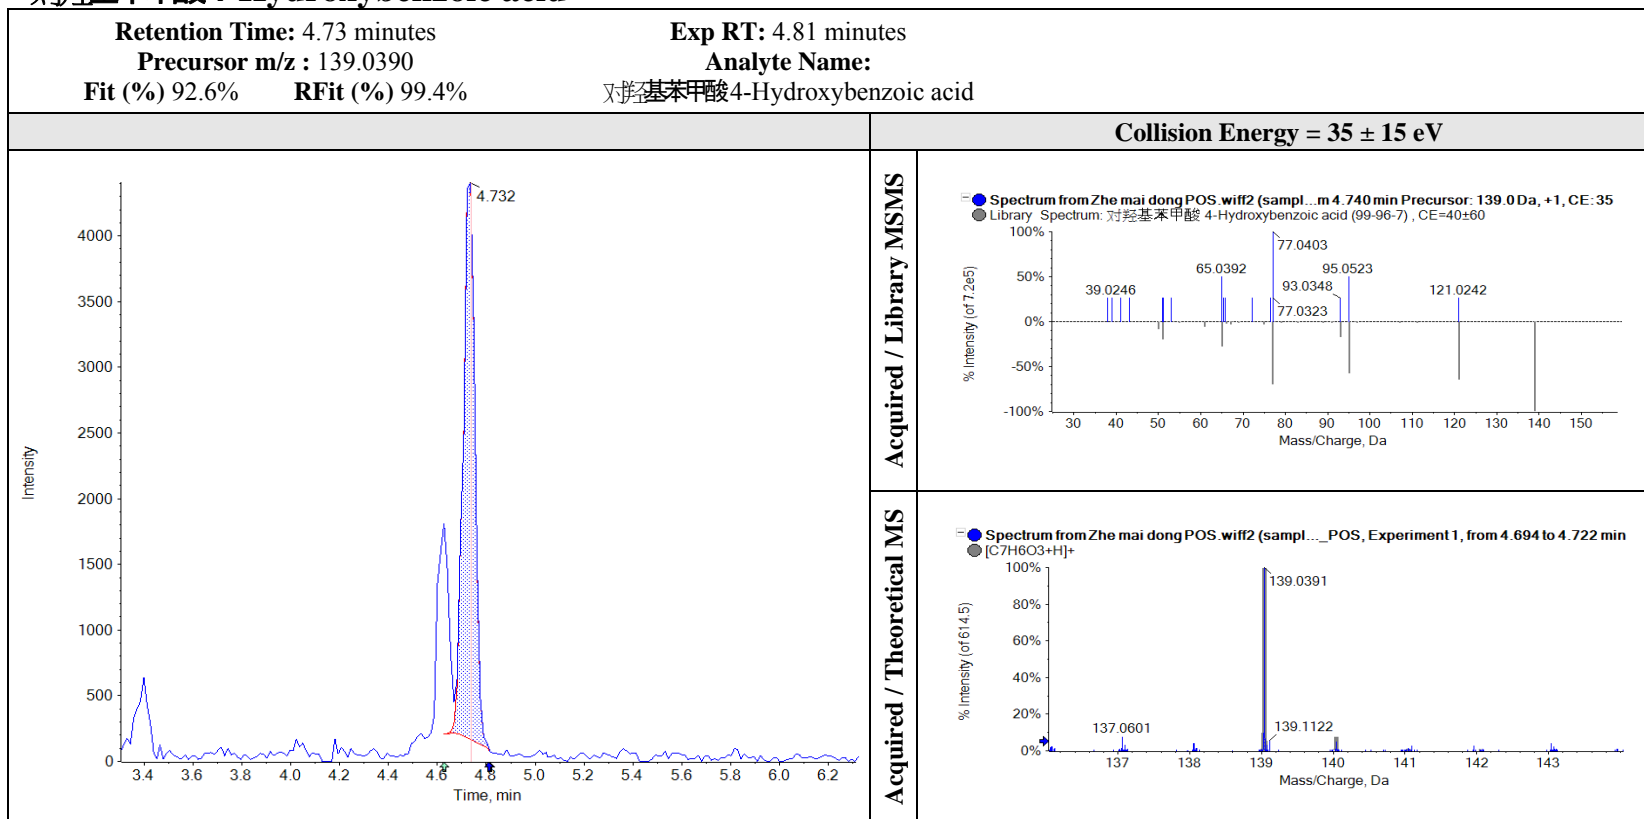

### 瑞香素 Daphnetin

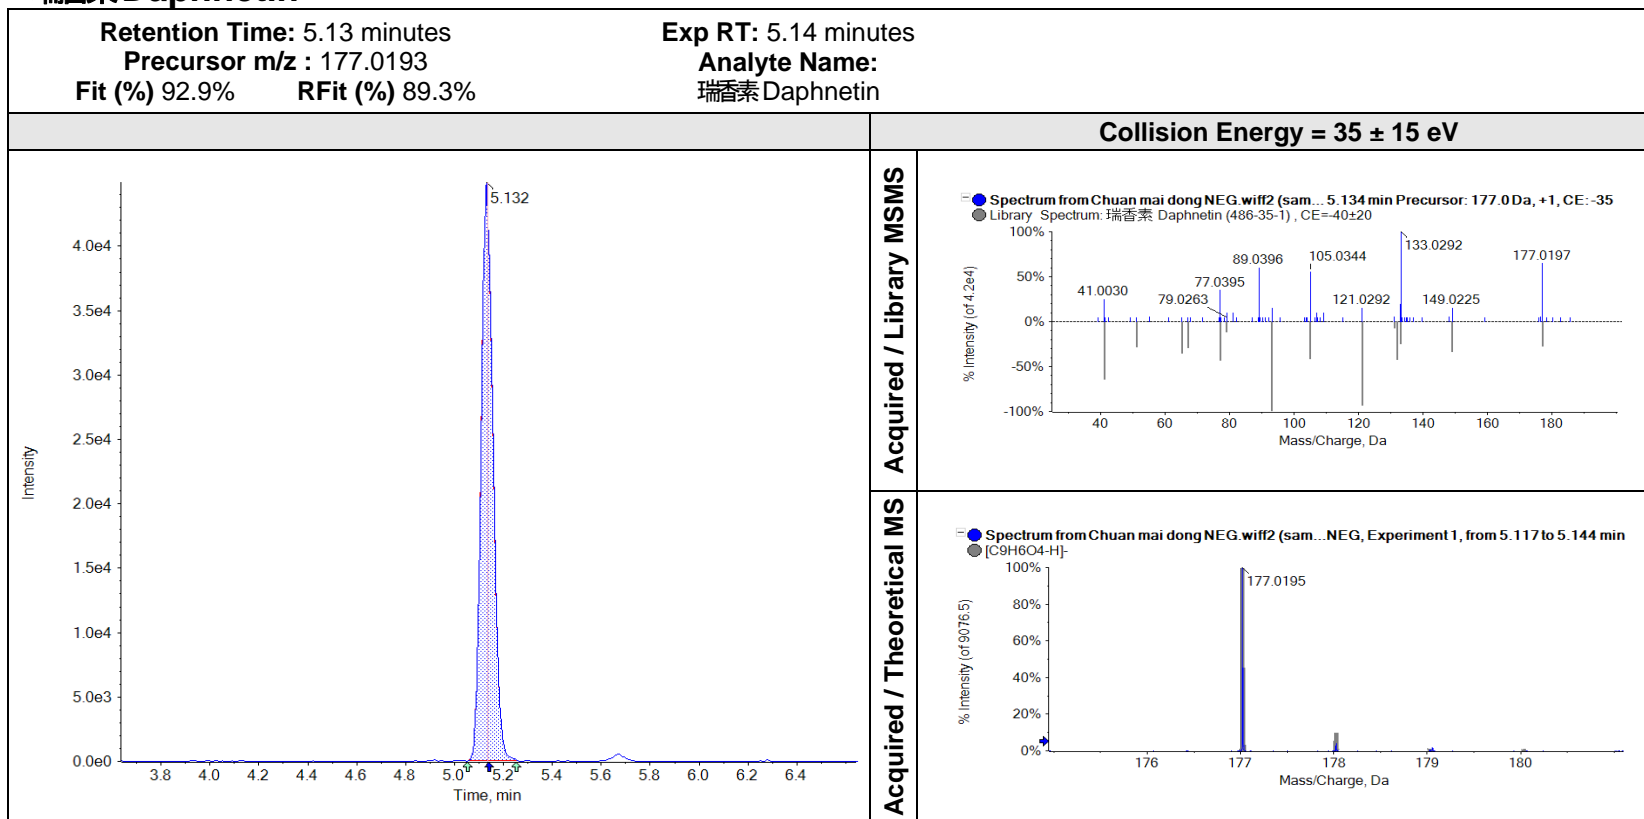

### 秦皮乙素 Esculetin

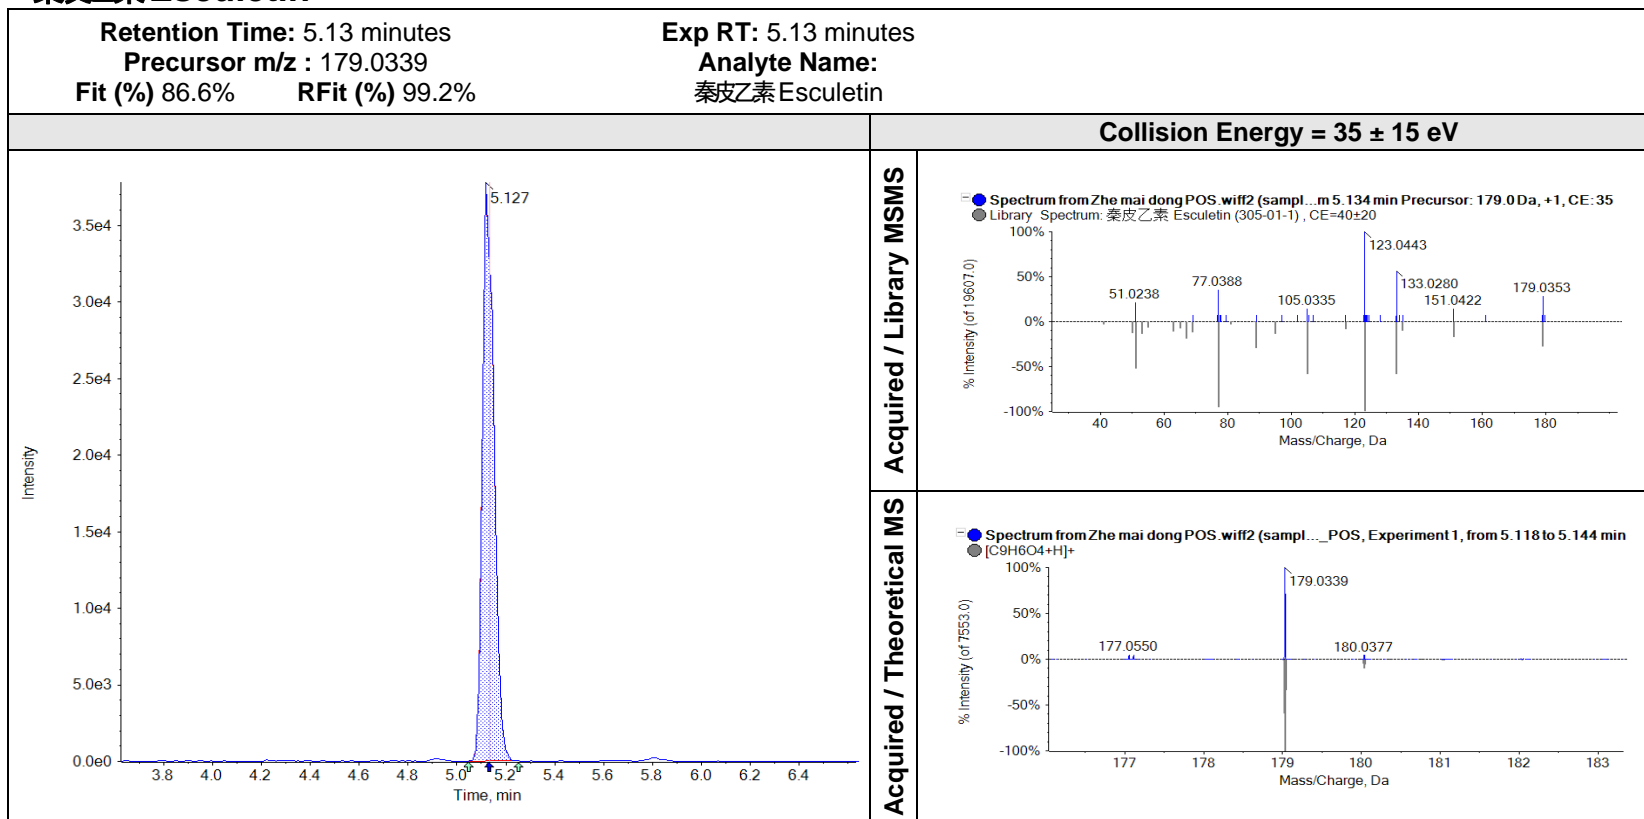



### 芦丁Rutin

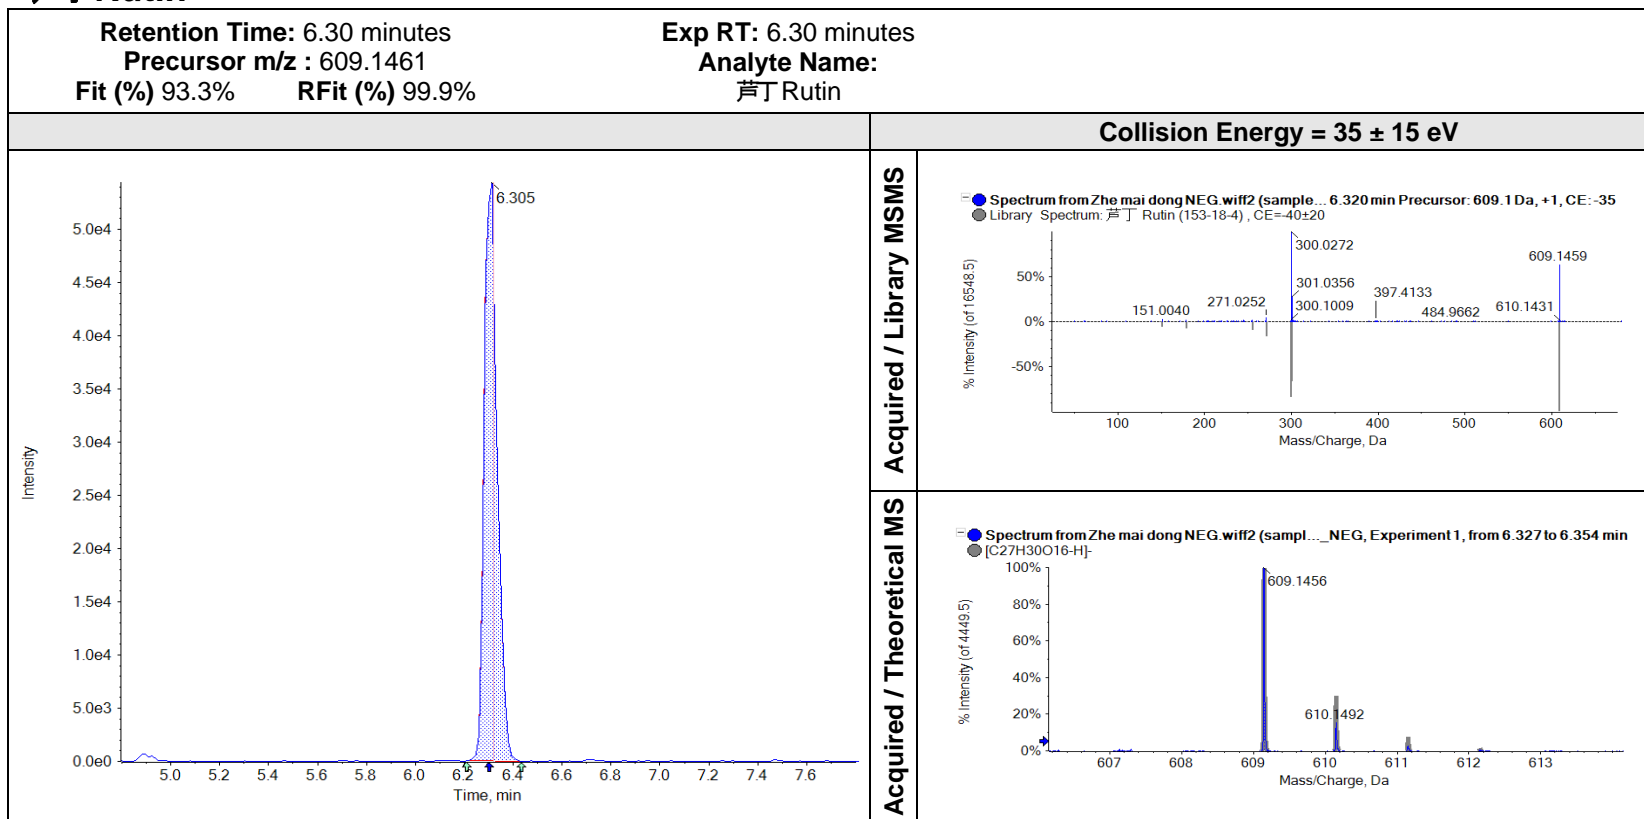

### 金丝桃苷 Hyperin

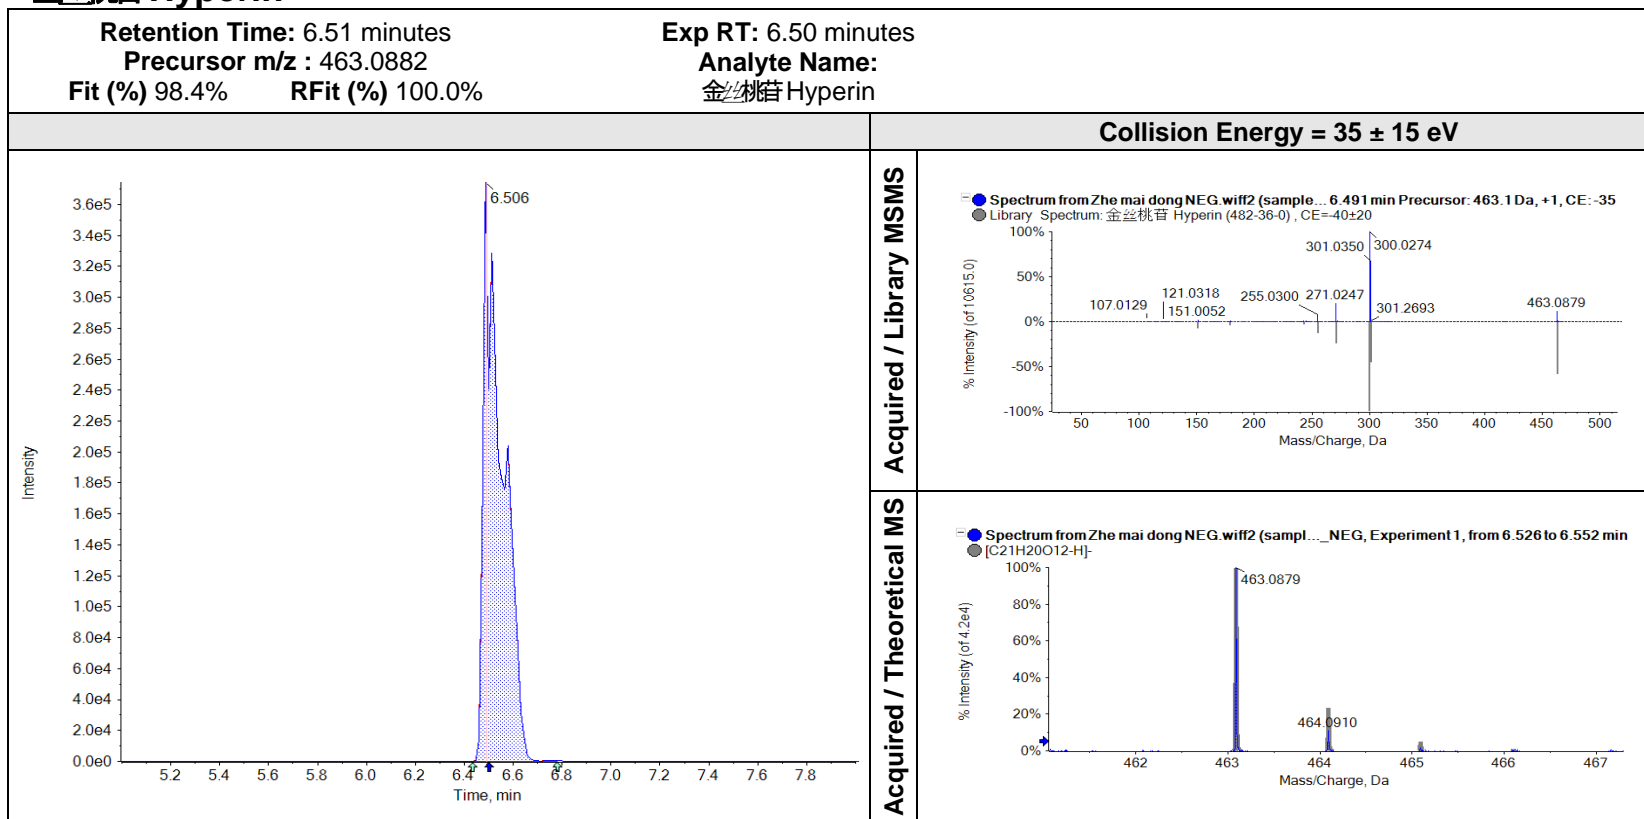

### 6-羟基-7-甲氧基香豆素

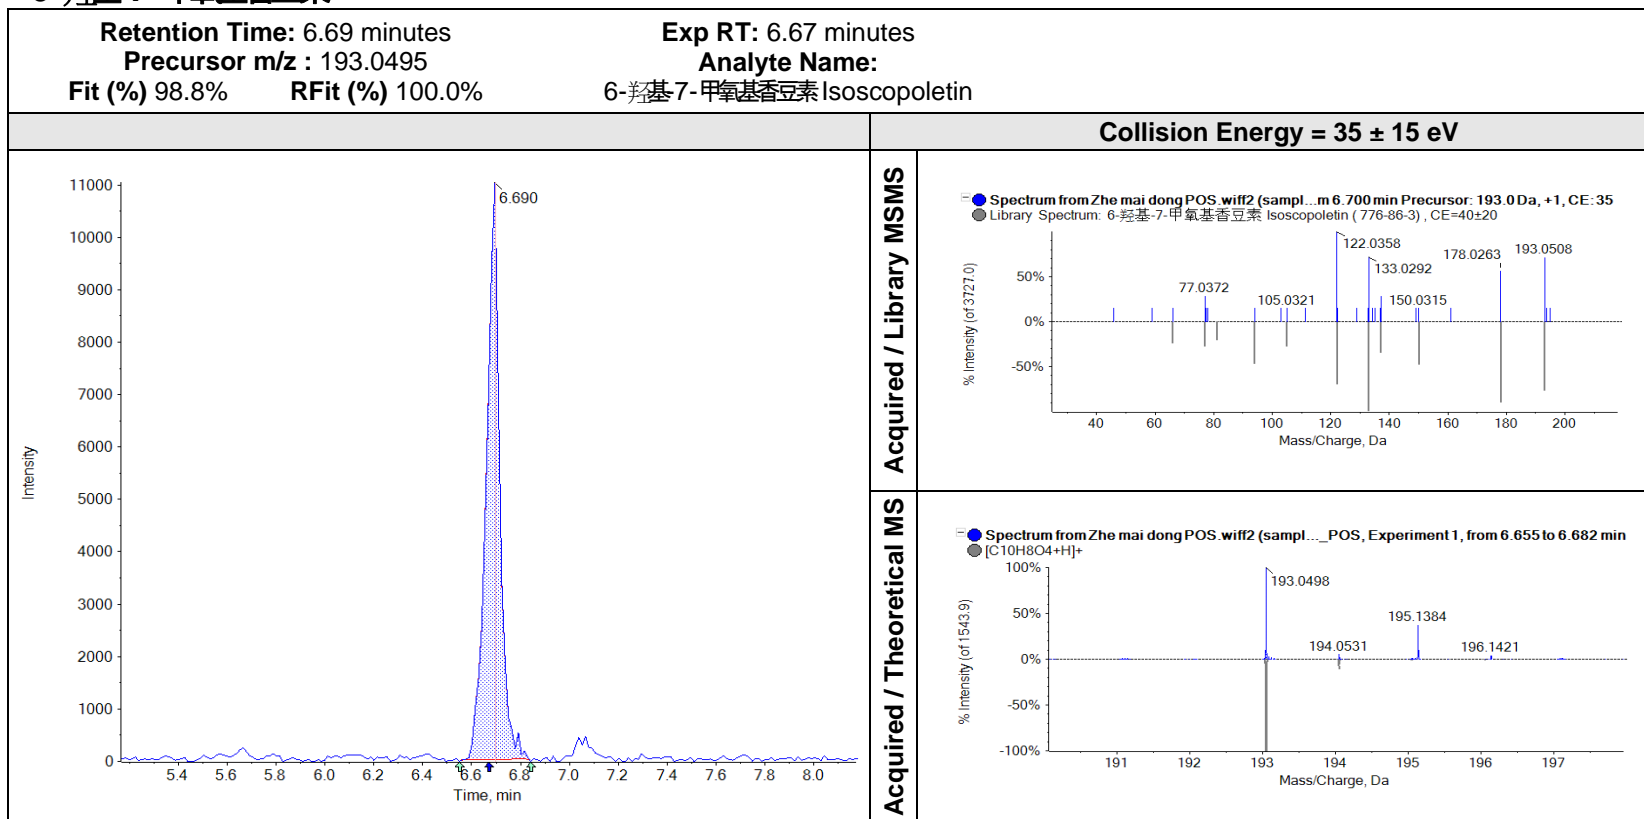

### 异阿魏酸 Isoferulic acid

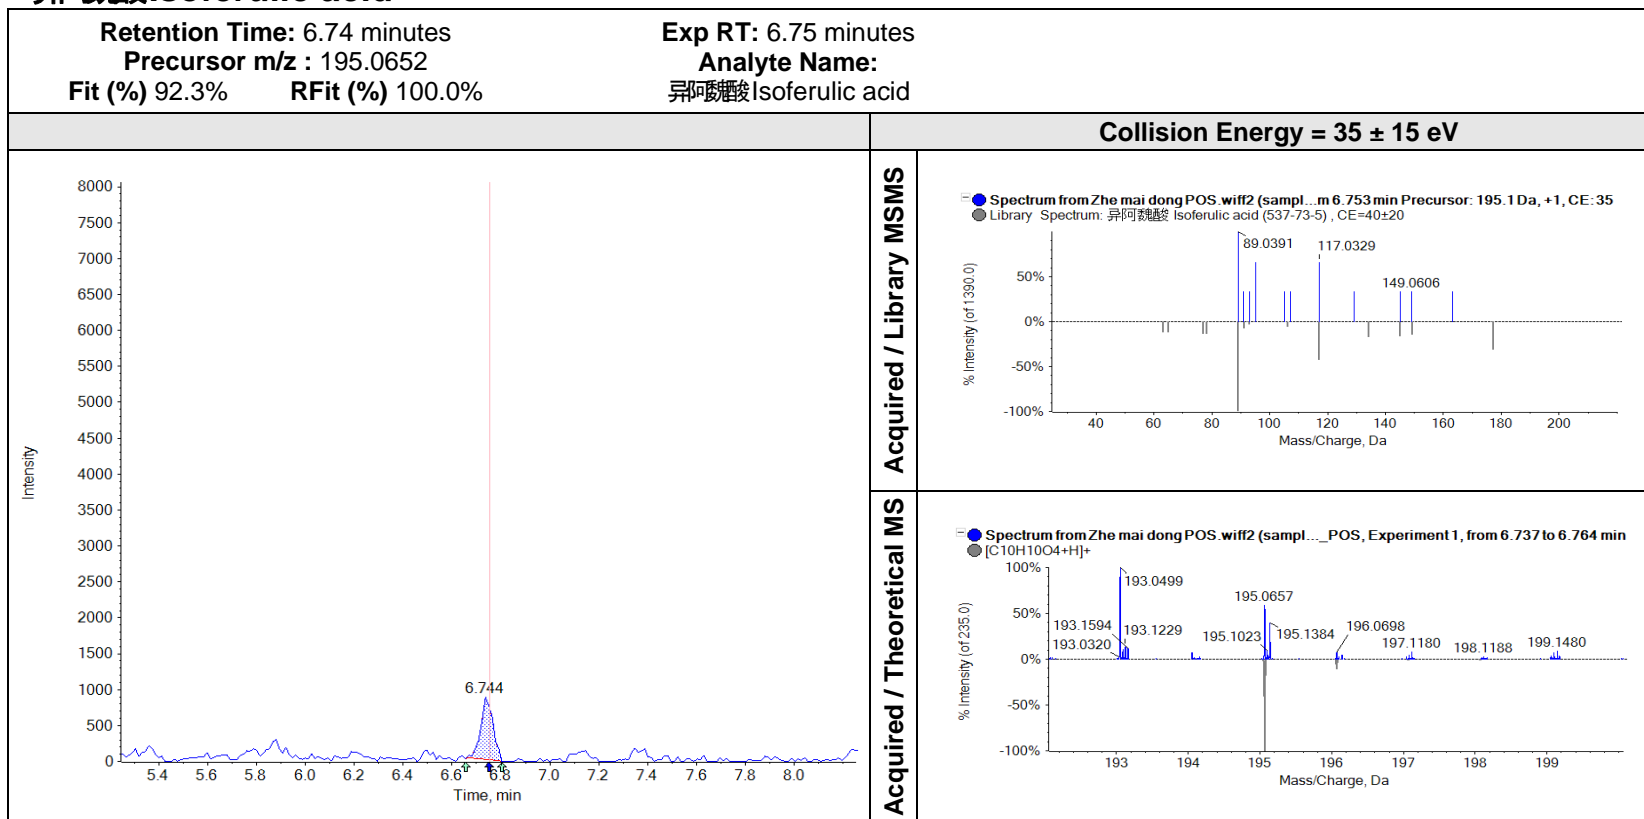

**木犀草苷 Luteoloside** (Mass/FragMass/RT/Isotope/Library/Formula/Ion Ratio) ✓ ● ● ▲ ✓ ● ●

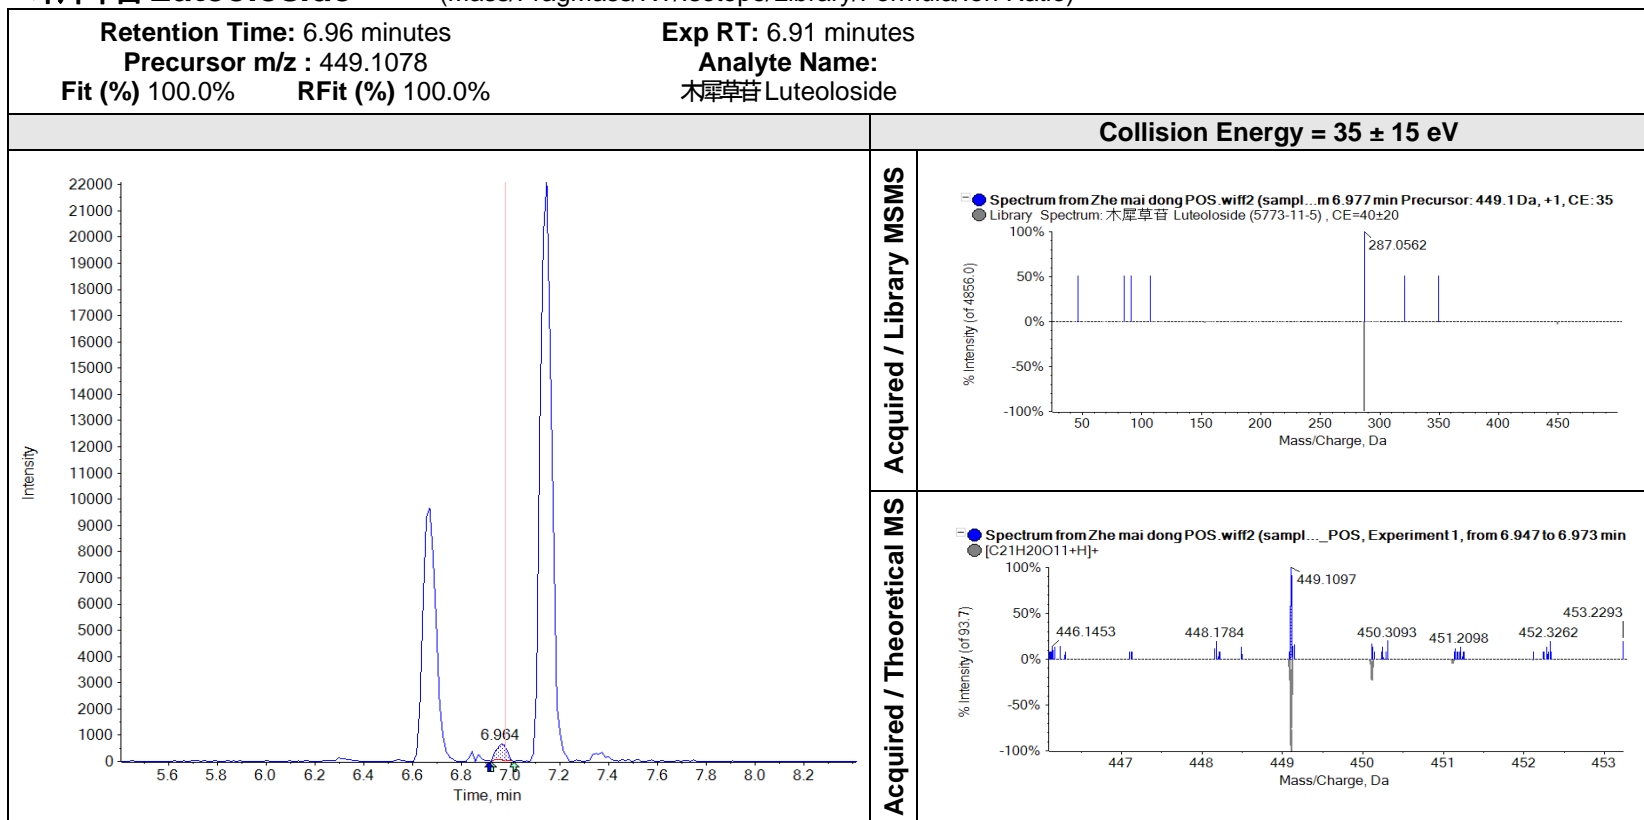

### 芸香柚皮苷 Narirutin

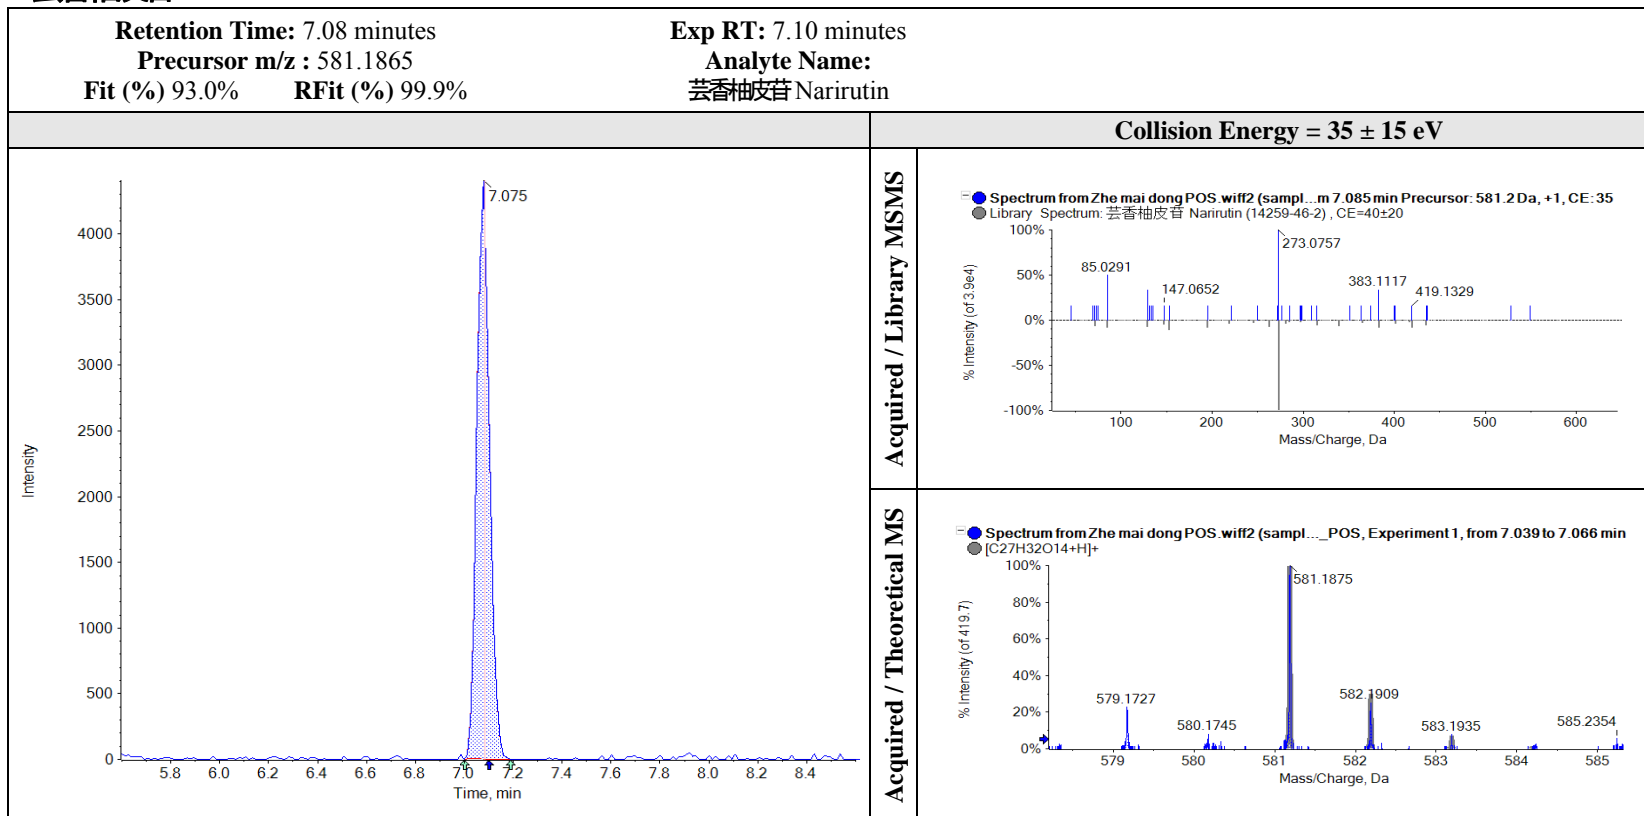

### 木犀草素 Luteolin

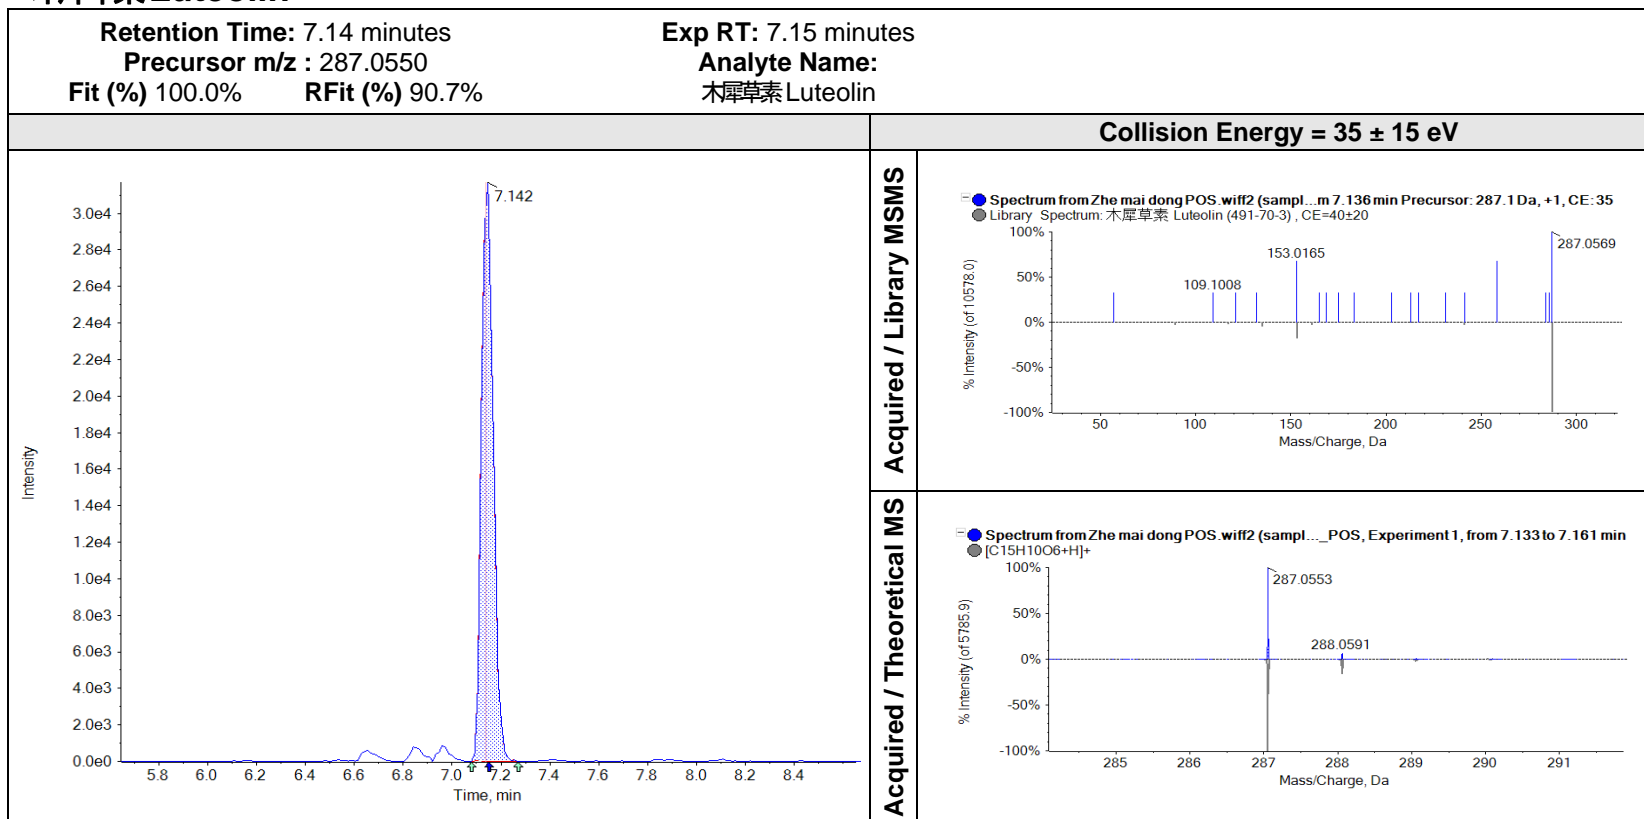

### 染料木苷 Genistin

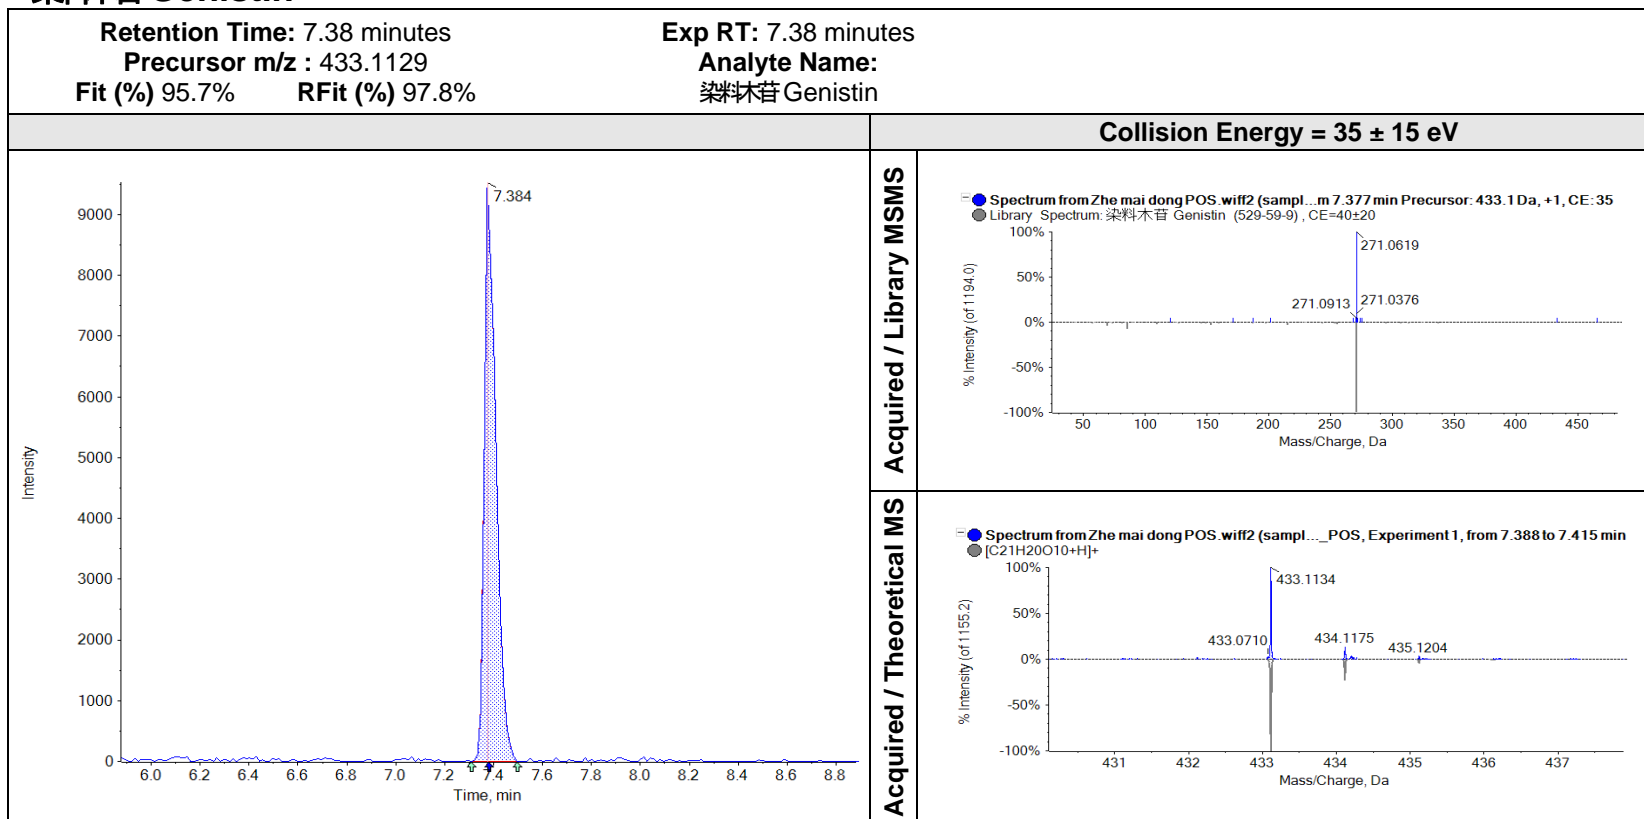



### 橙皮苷 Hesperidin

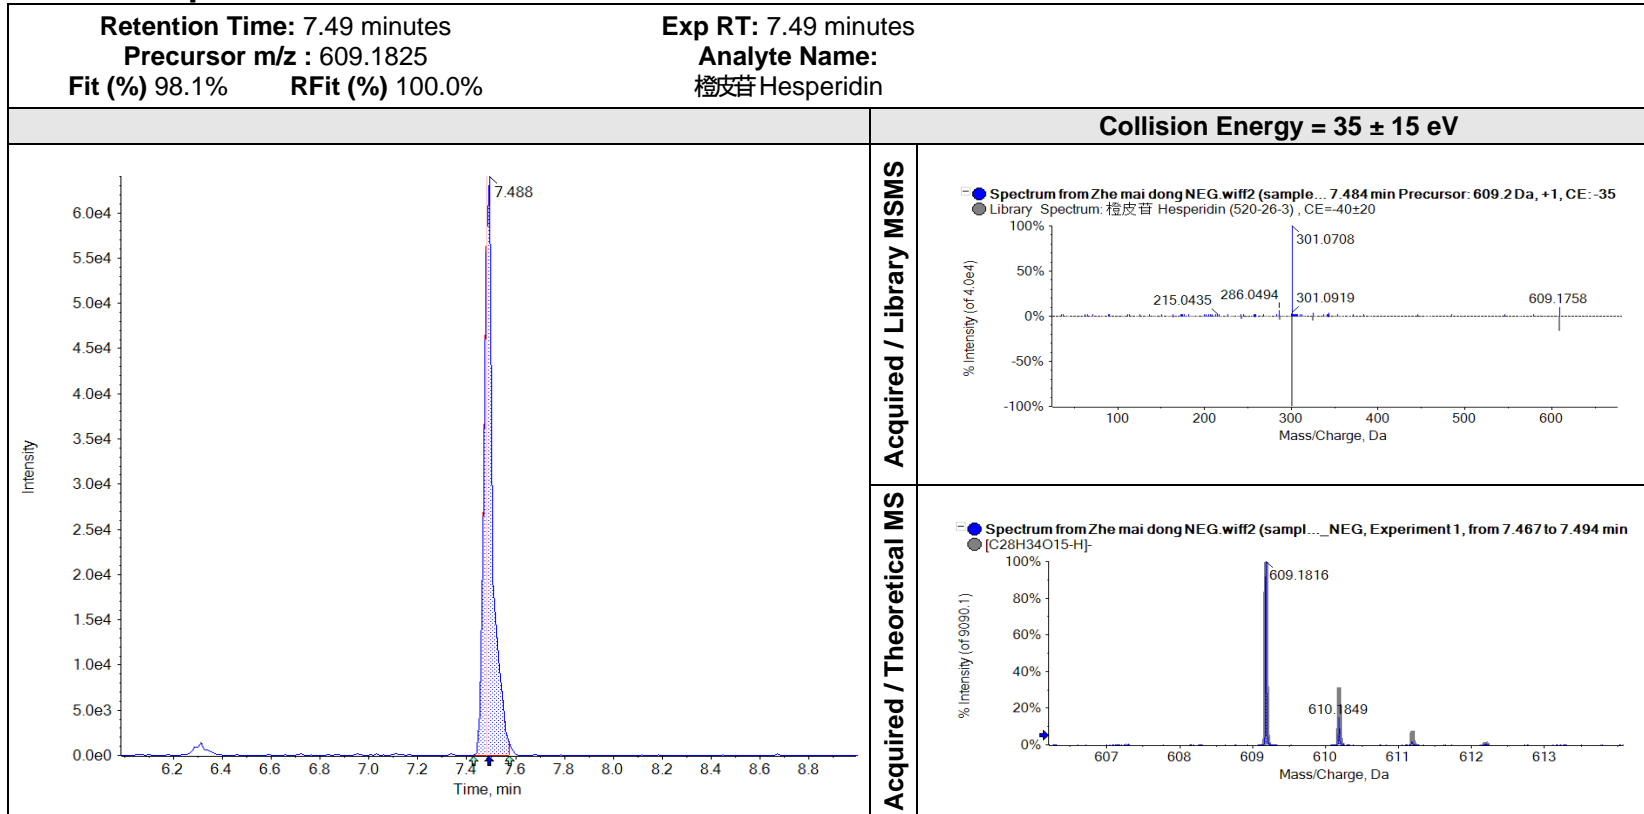

红车轴草素 7-O-D-葡萄糖苷 Pratensein-7-O-glucoside



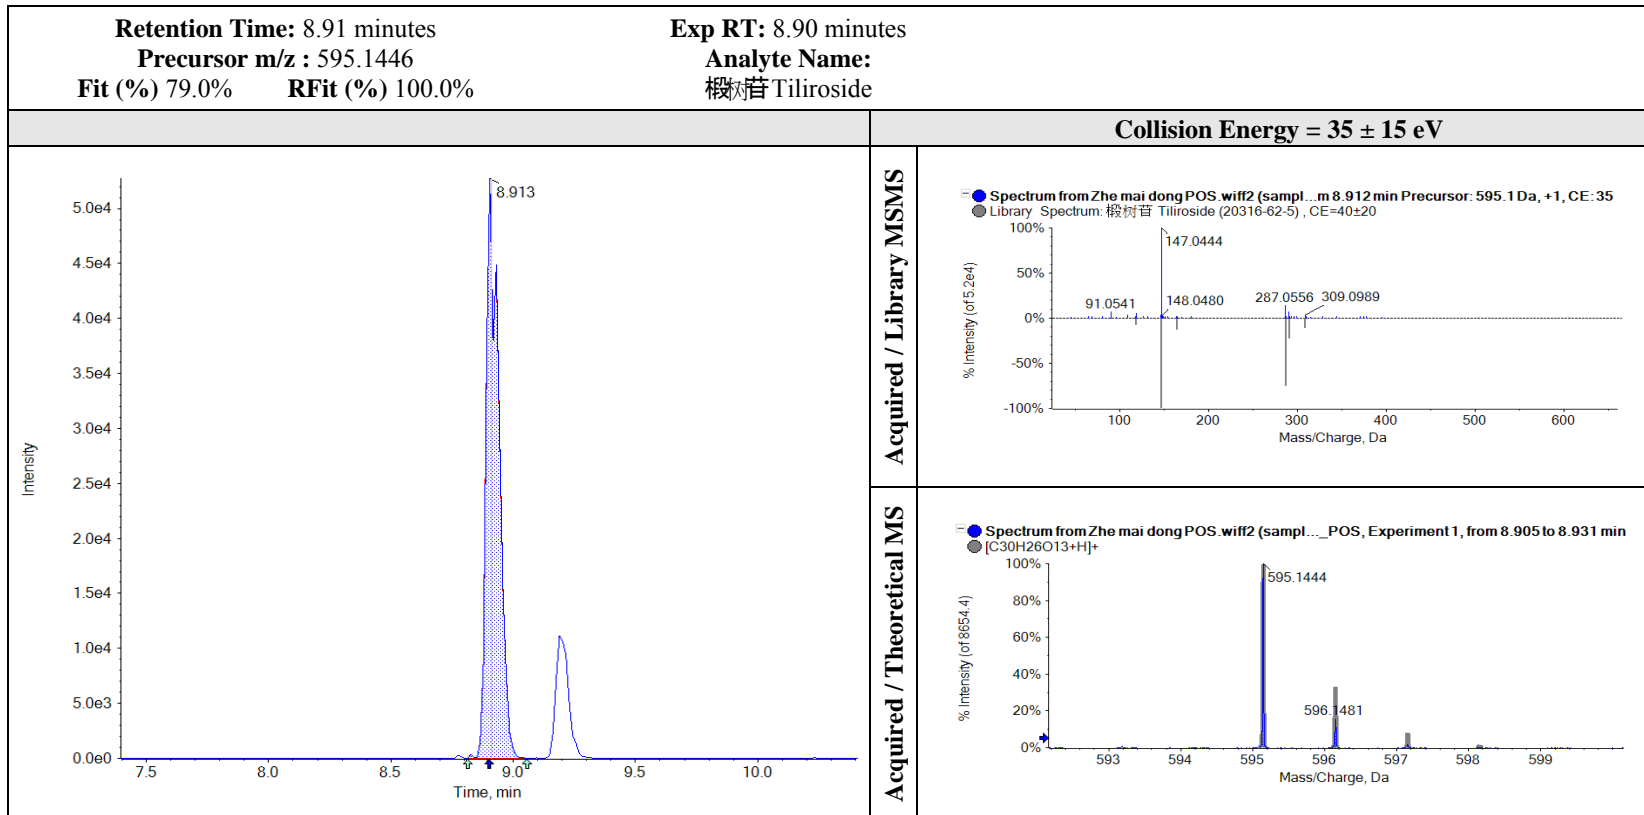

毛蕊异黄酮苷 Calycosin-7-O-glucoside

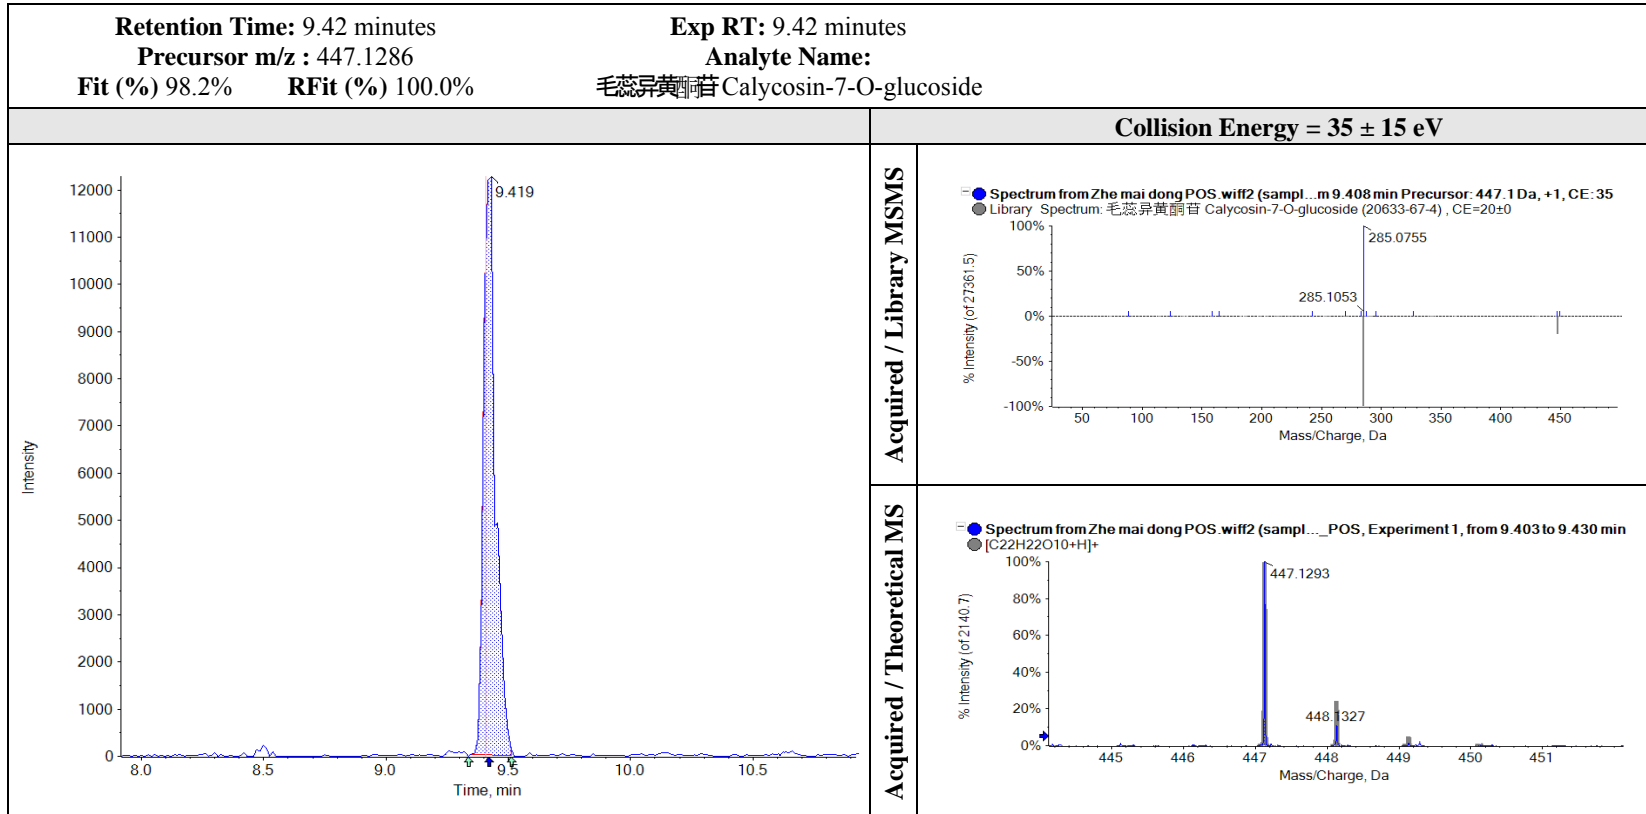

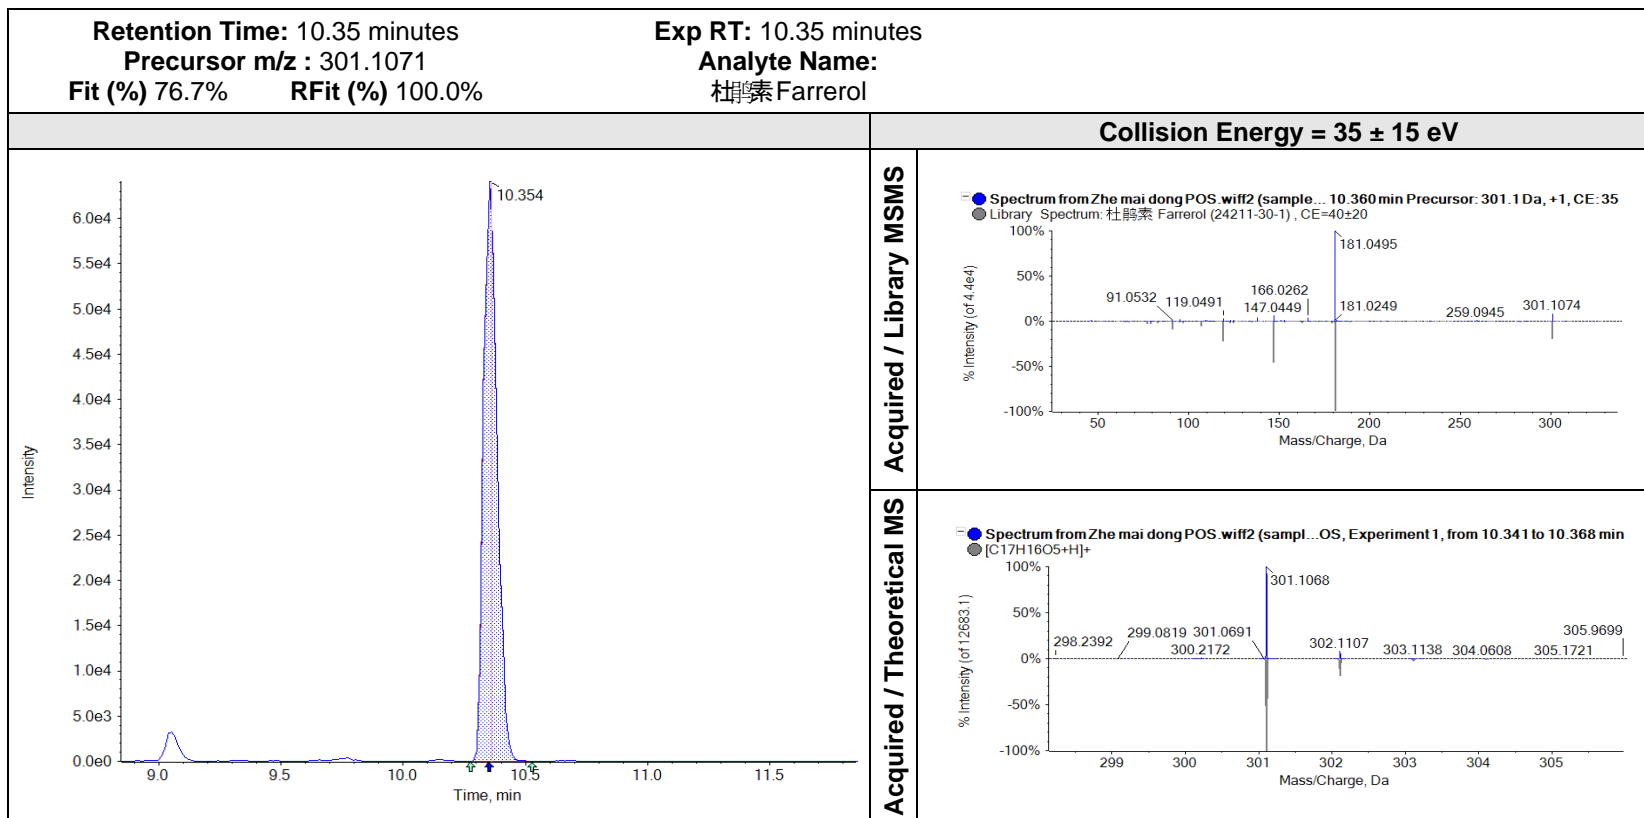

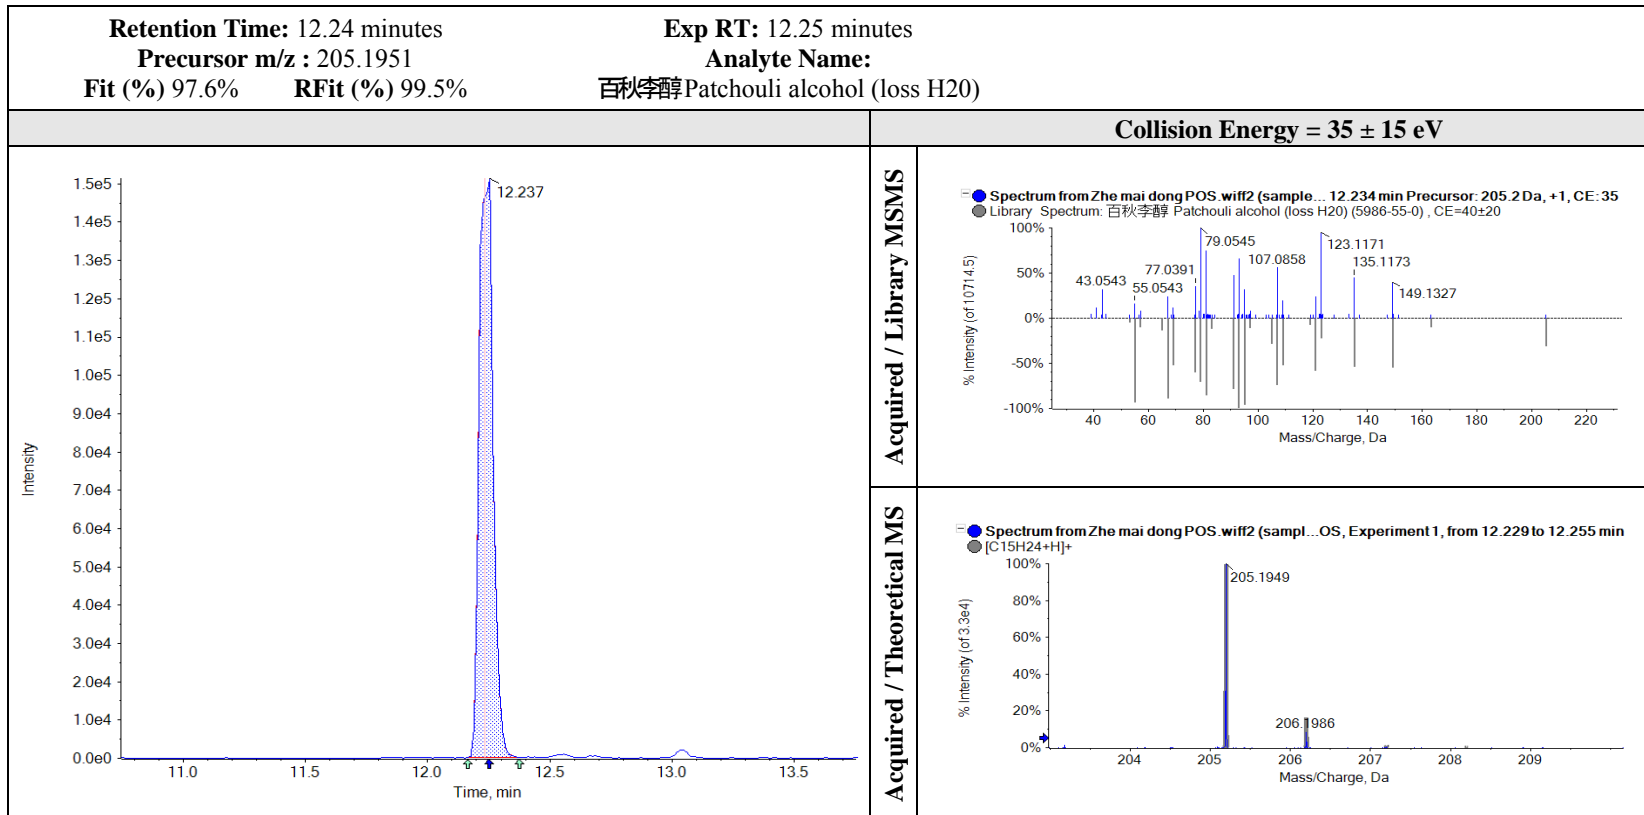

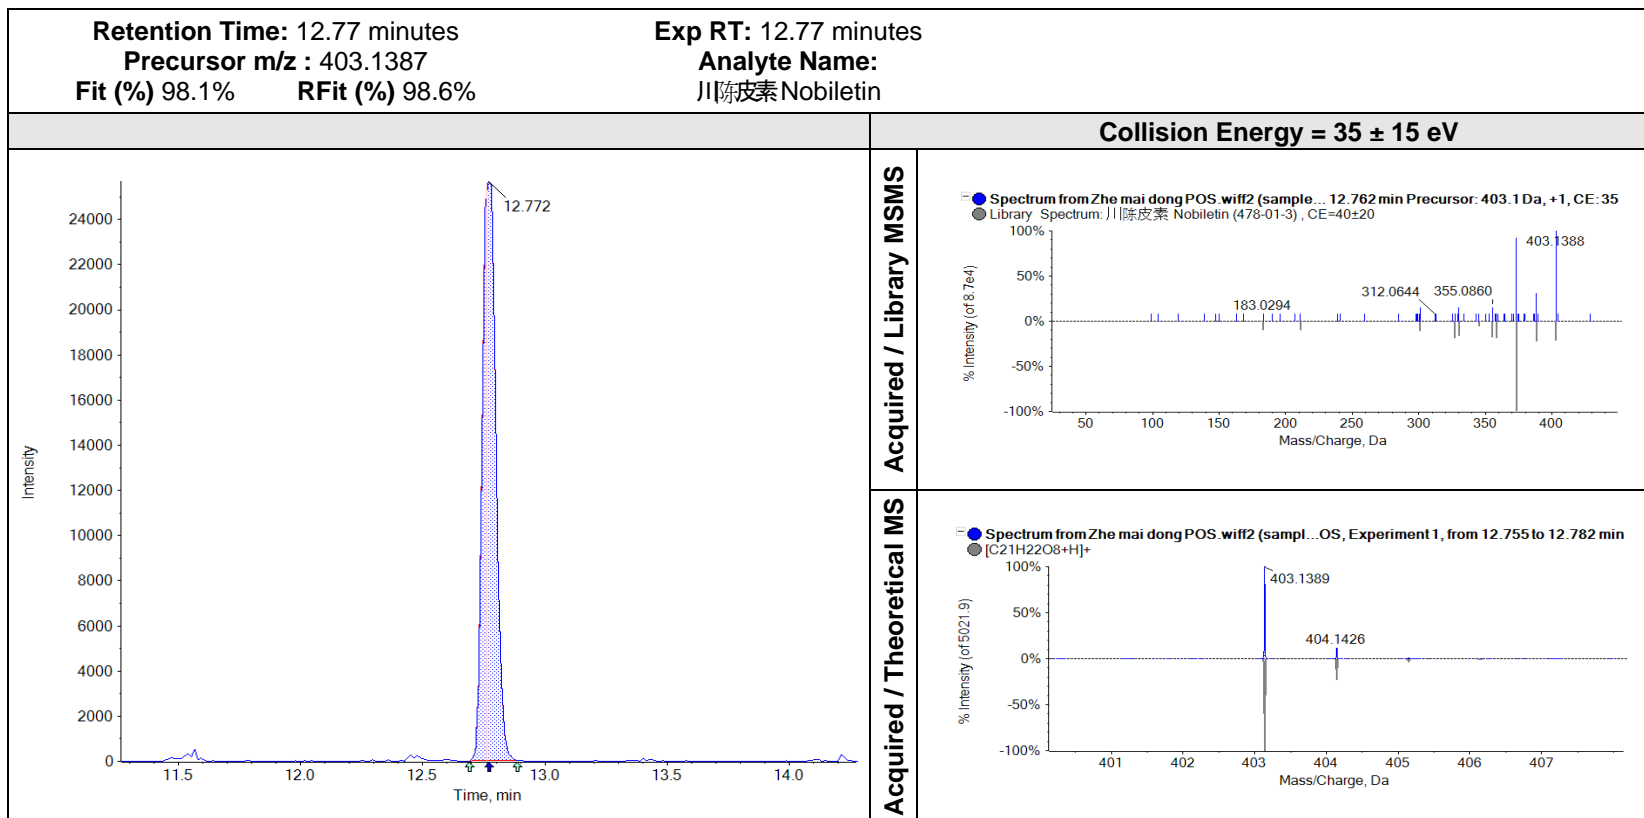

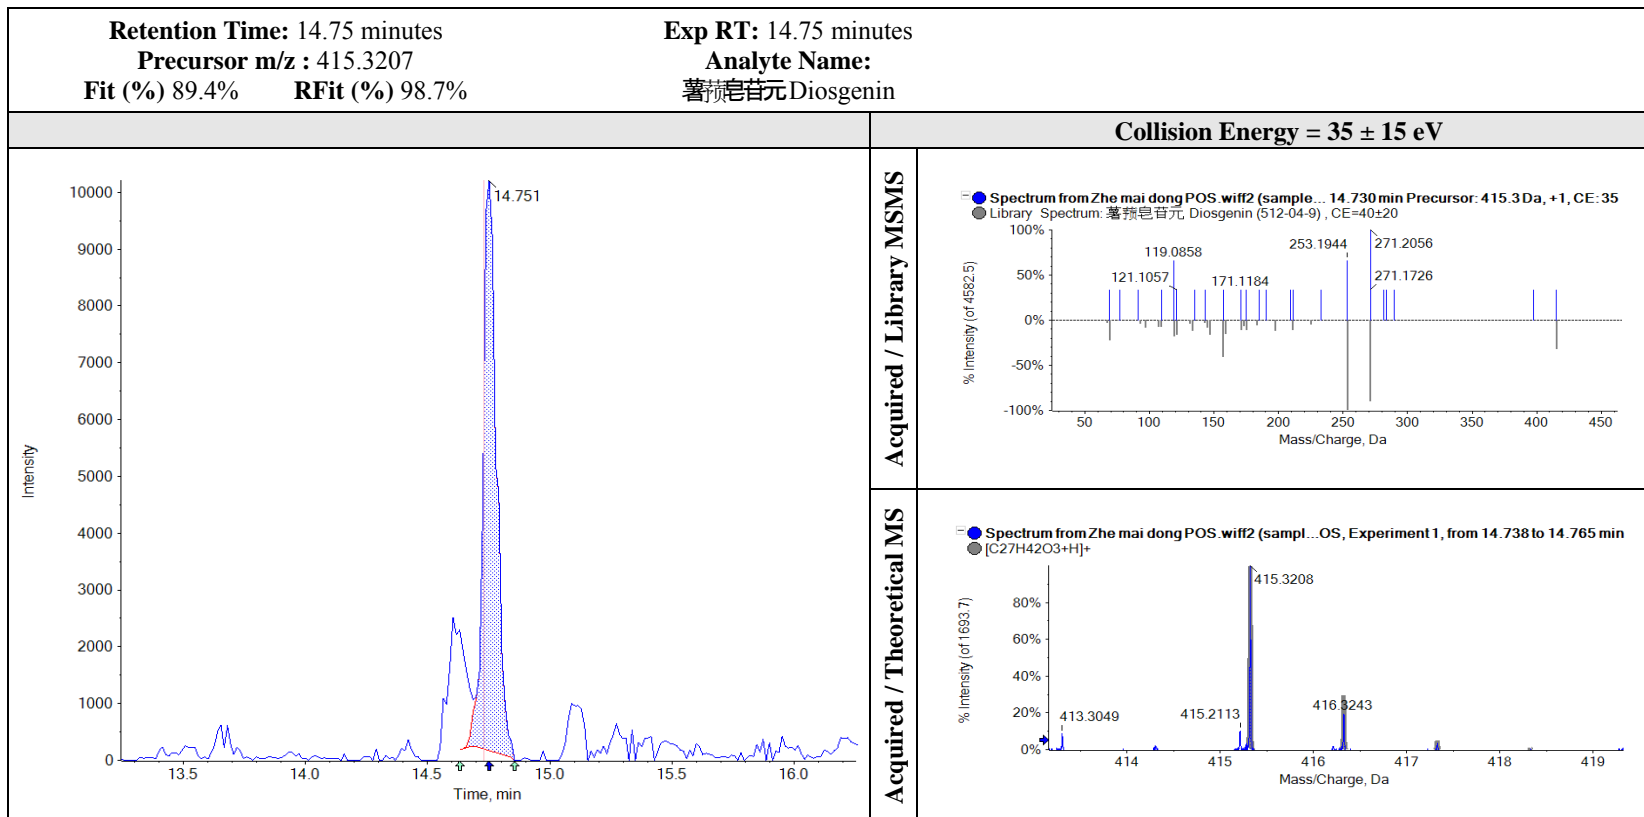

薯蓣皂苷元 Ruscogenin



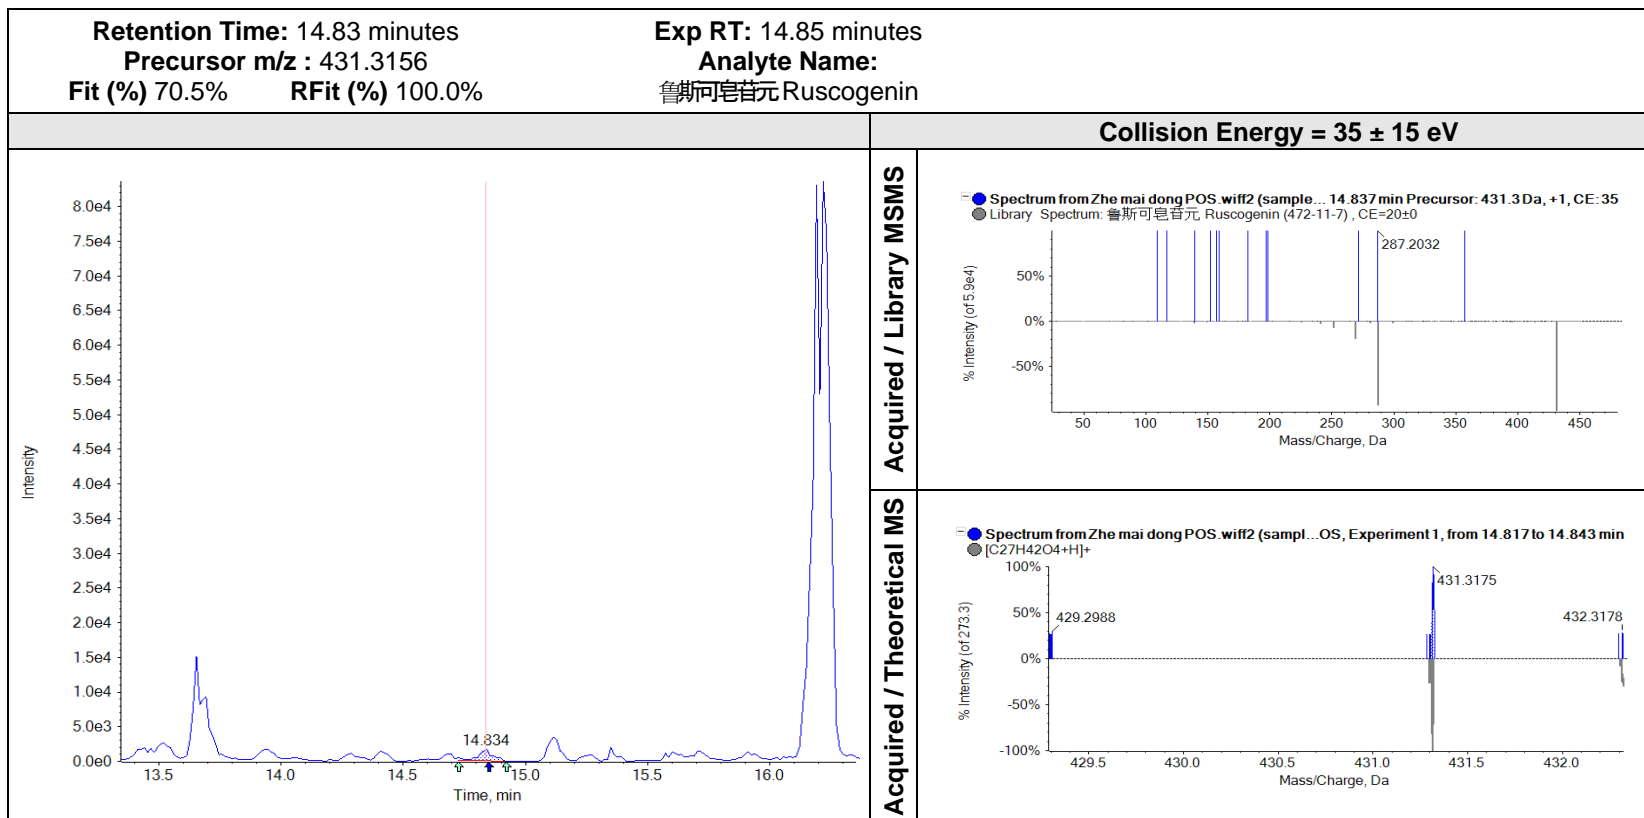

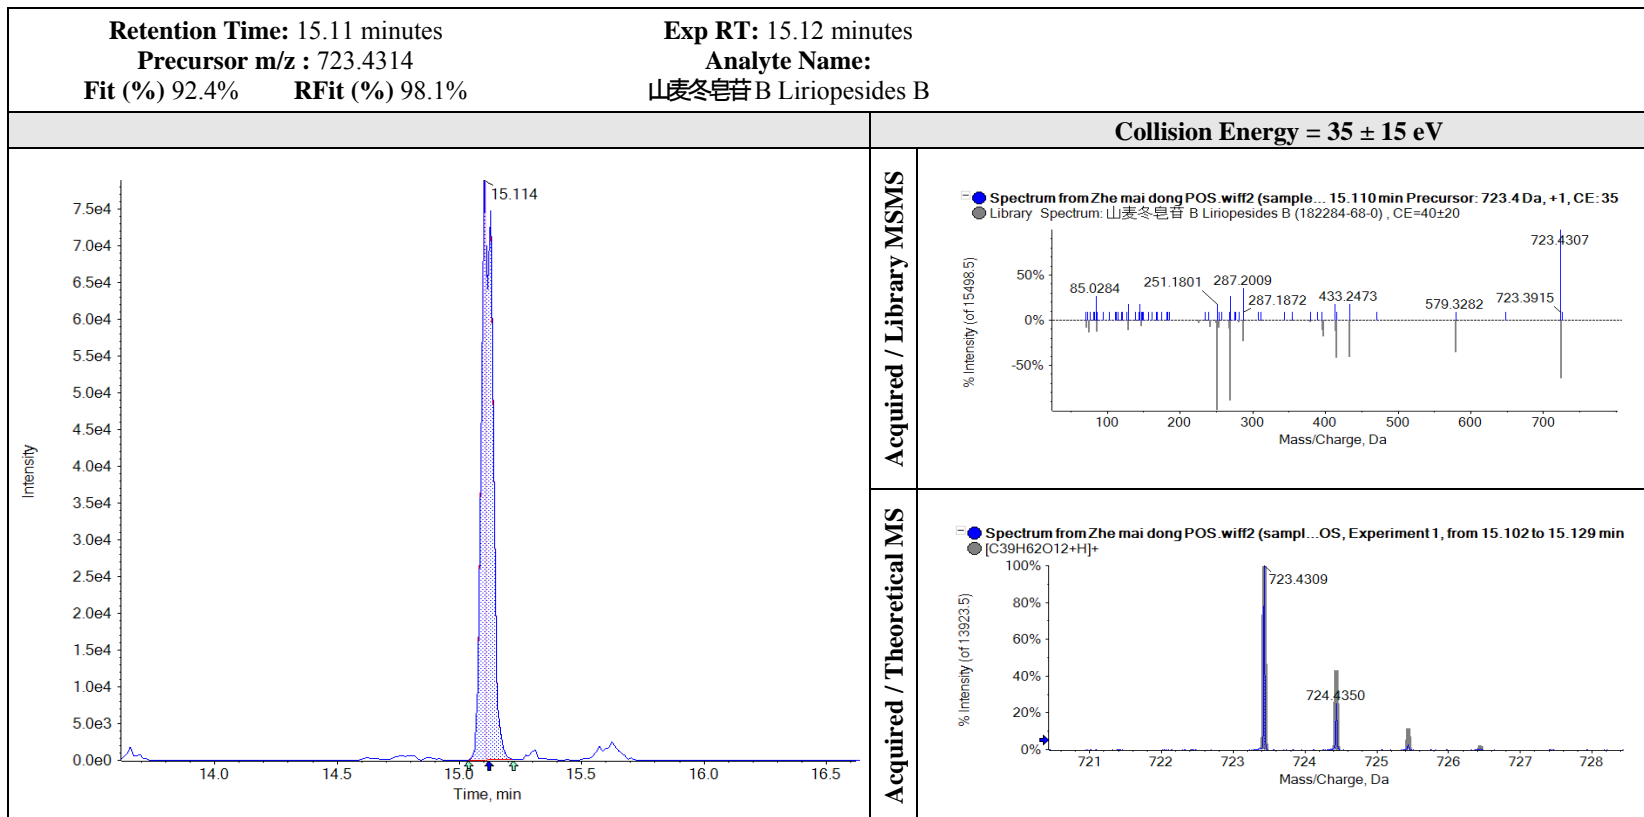

**MS fragmentation pathways for different chemical constituents of ZMD in negative ion mode**

**组氨酸 Histidine**

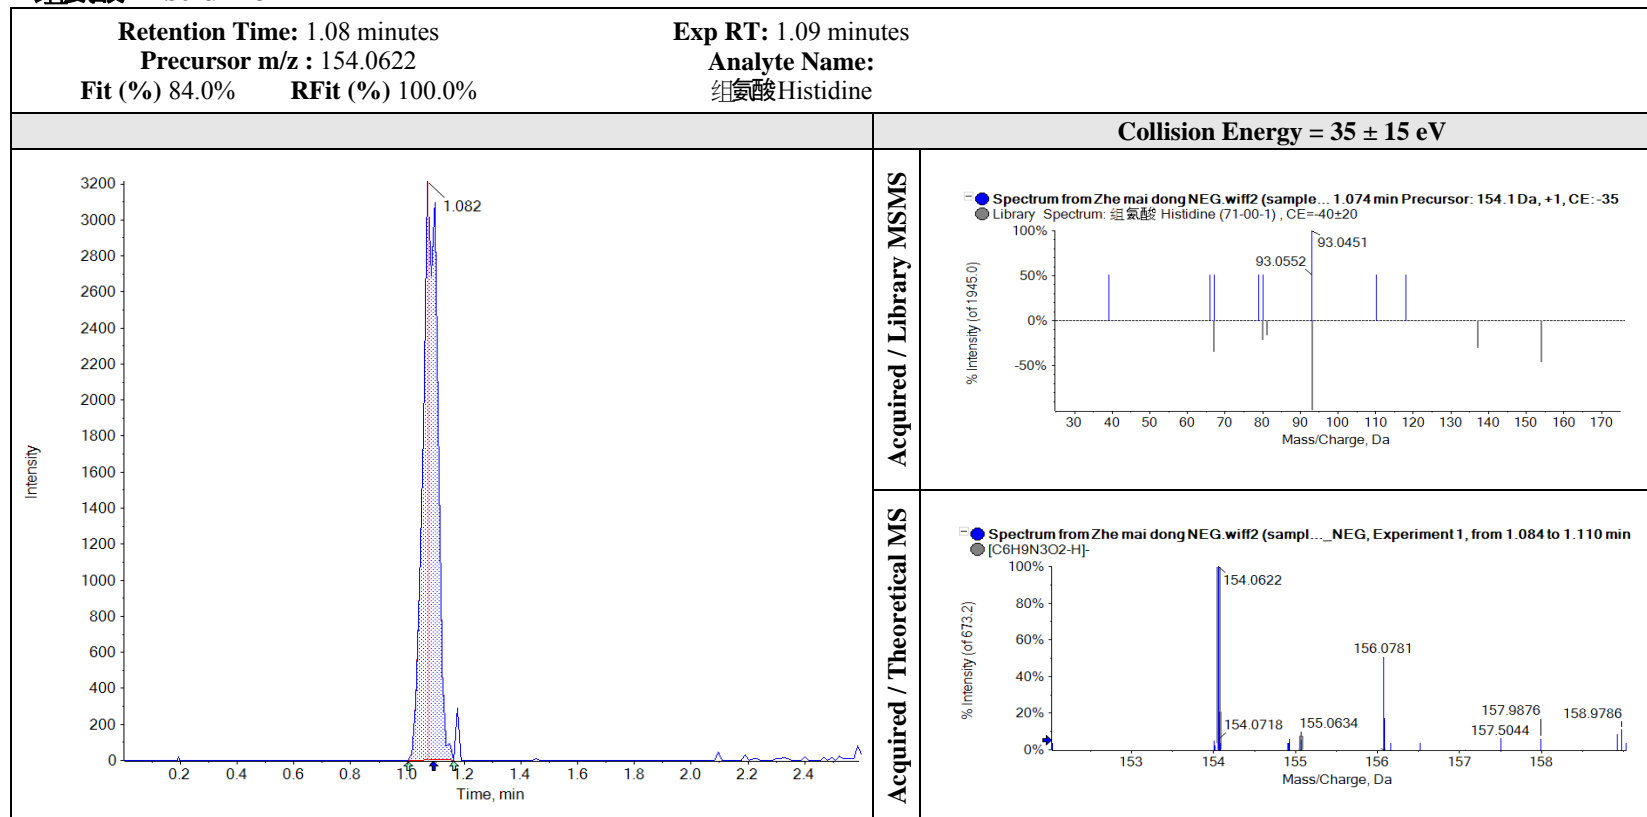

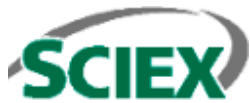

with SCIEX OS 1.3.1

Created

Printed:1/11/2021 4:55:13 PM

### 精氨酸L(+)-Arginine

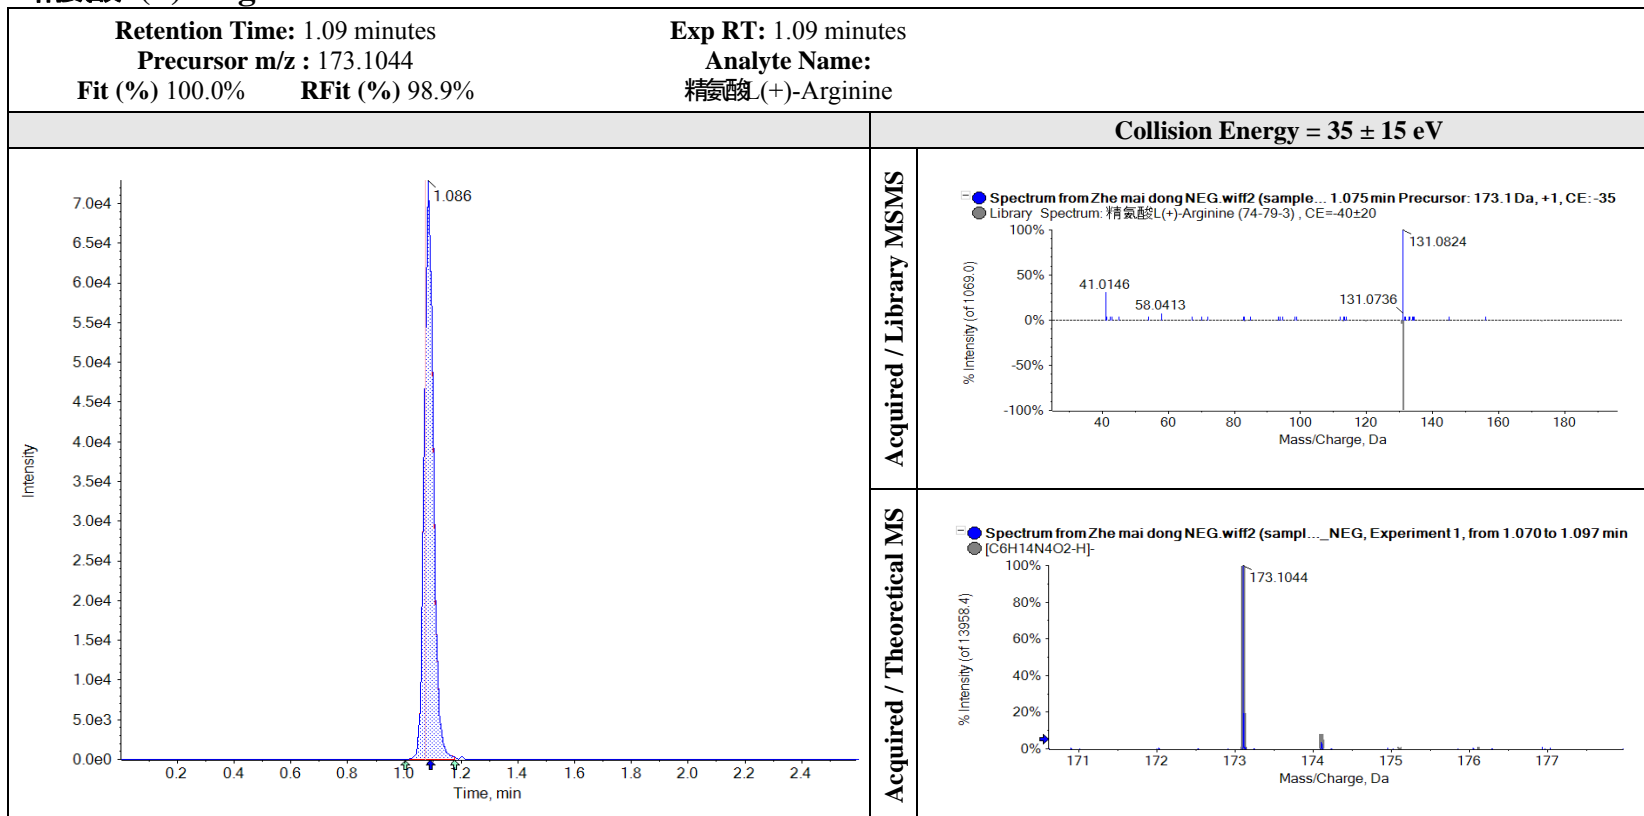

### D-甘露糖D-(+)-Mannose

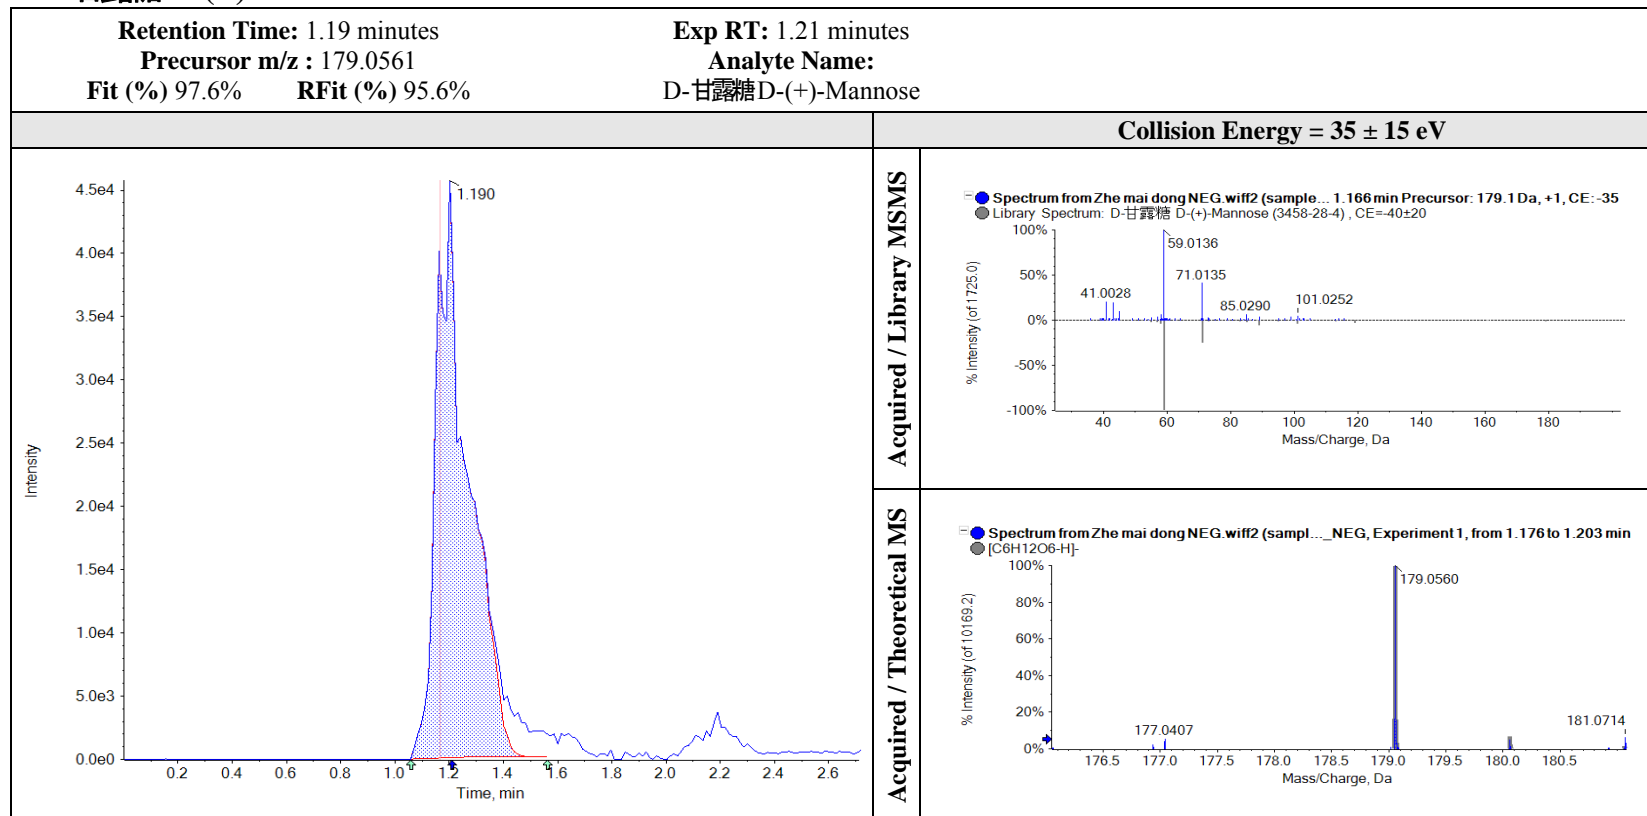

### L-苹果酸 L-Malic acid

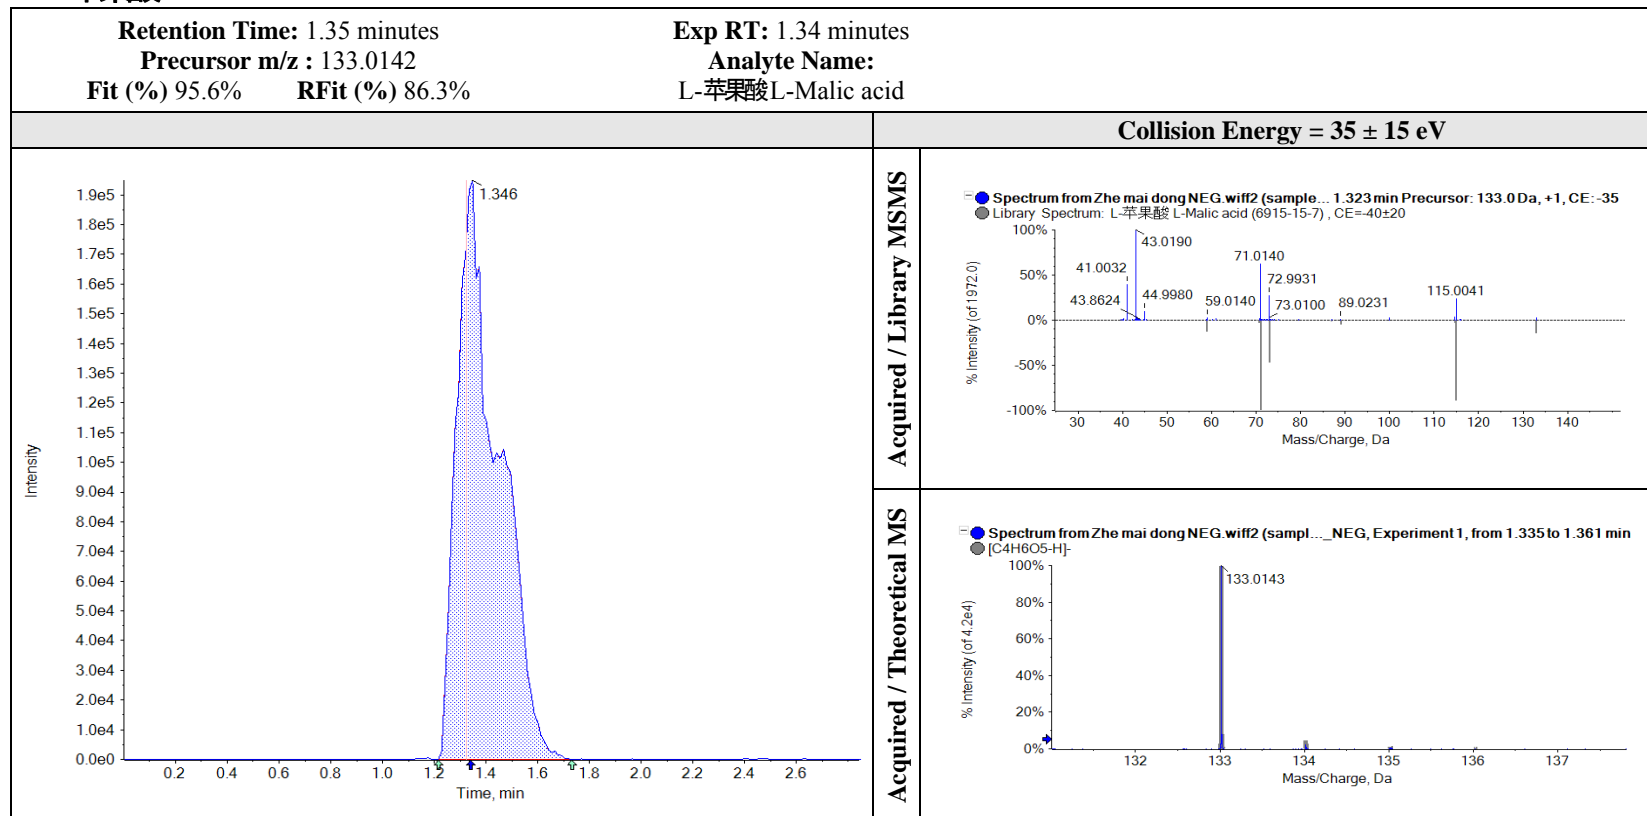

### 而琪糖 Fungitetraose

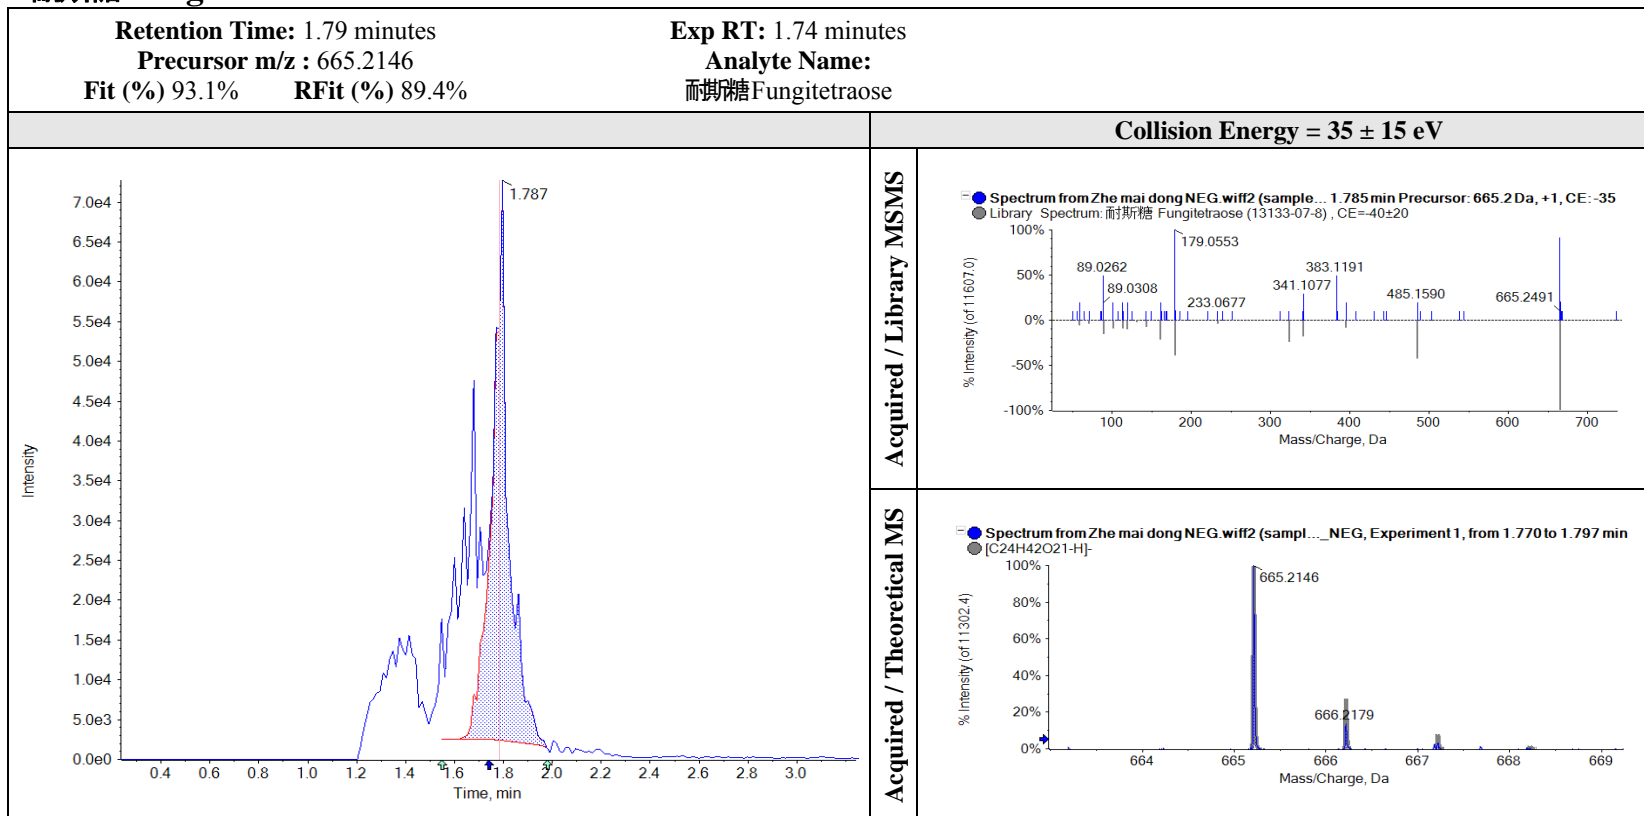

**柠檬酸 Citric acid**

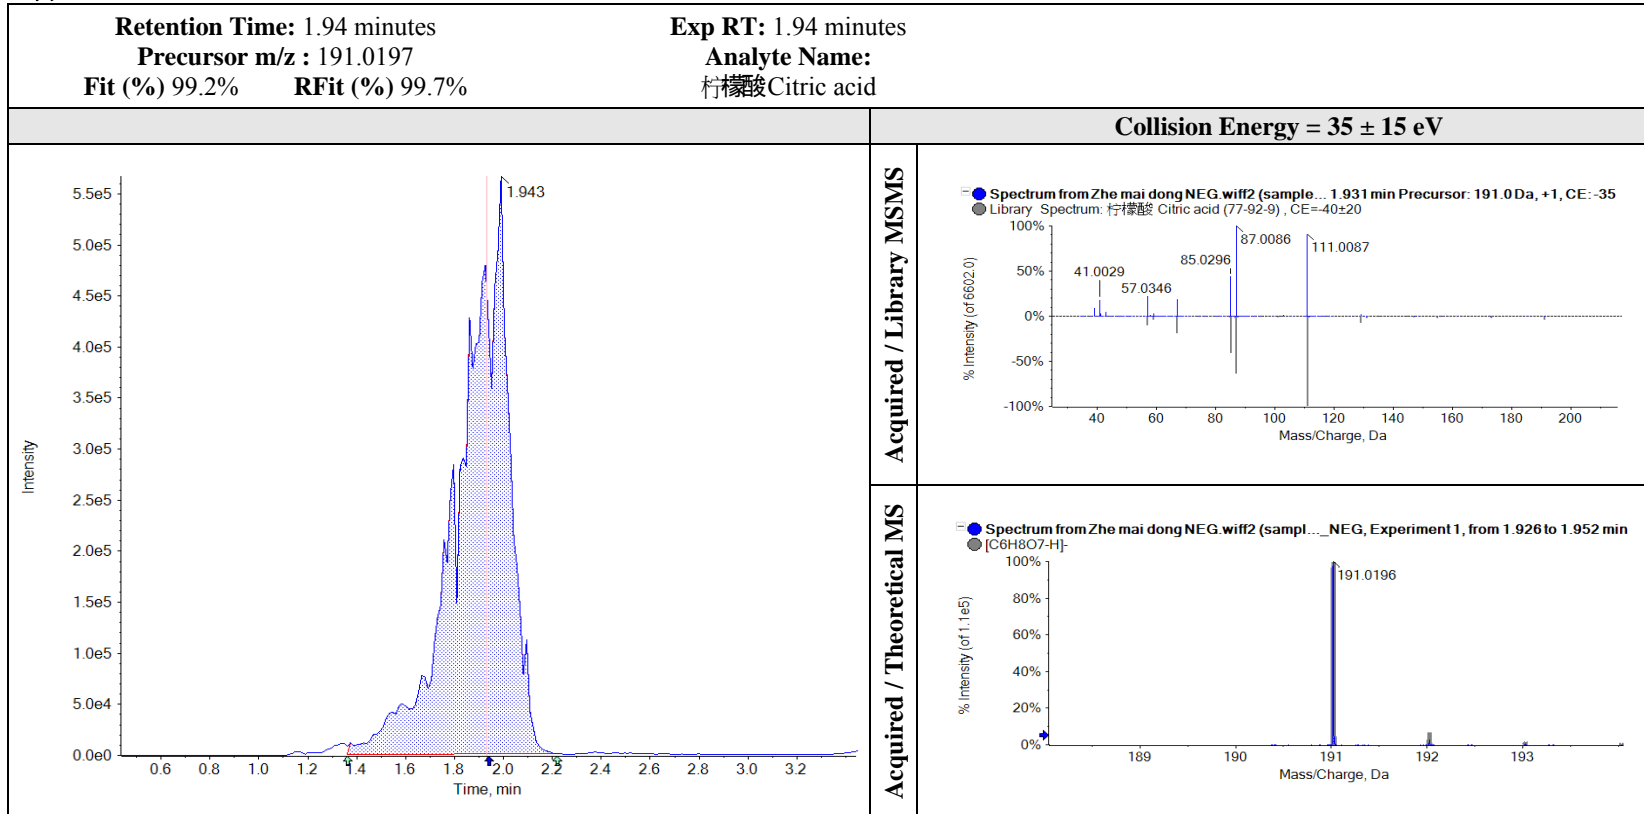



### 琥珀酸 Succinic acid

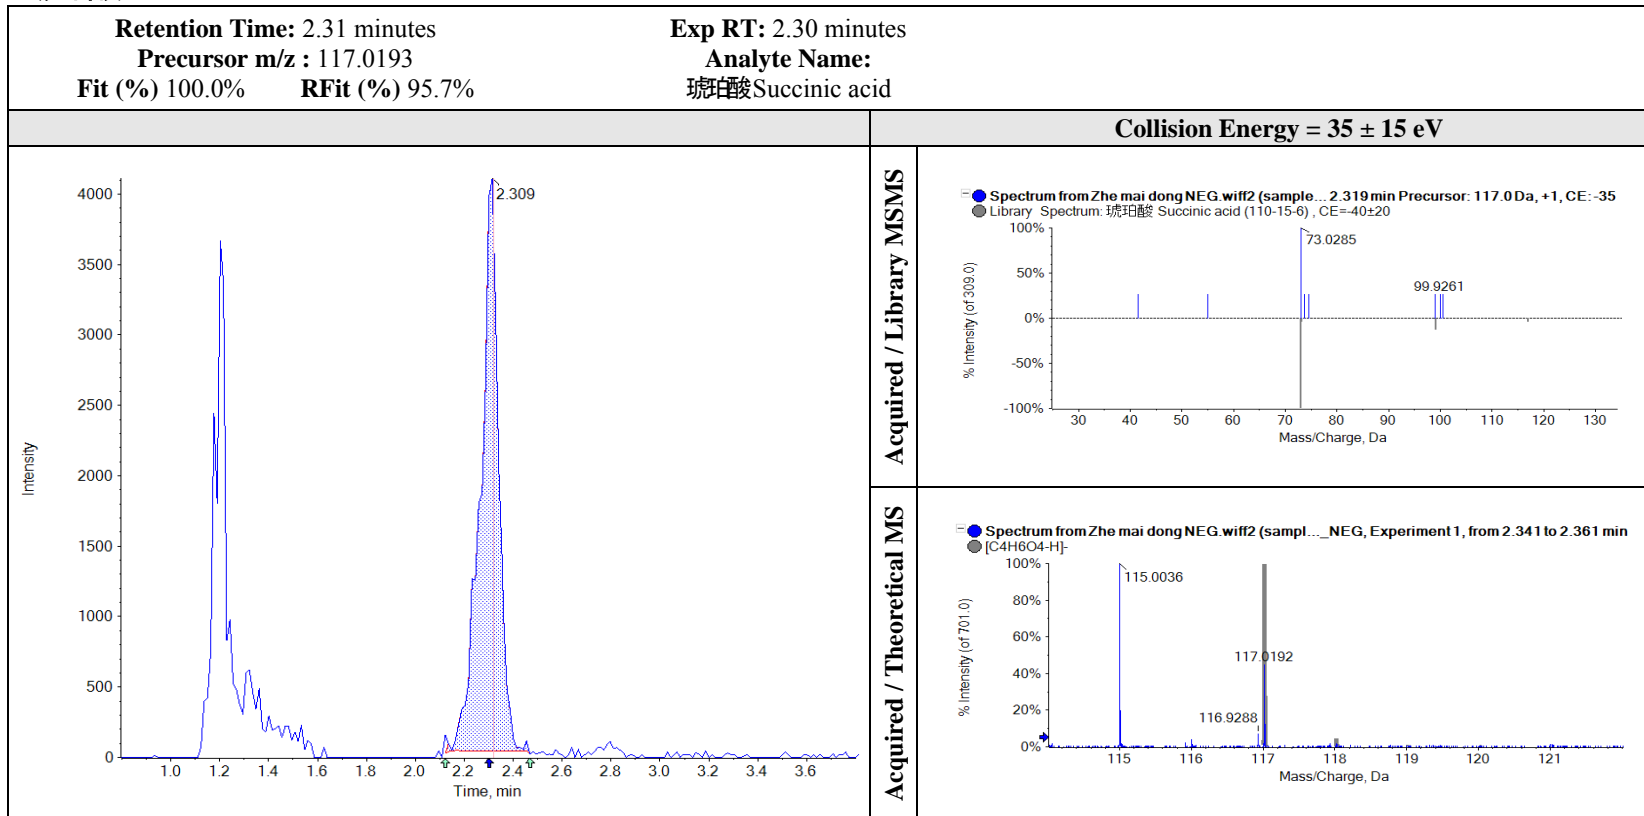

### 腺嘌呤 Adenine

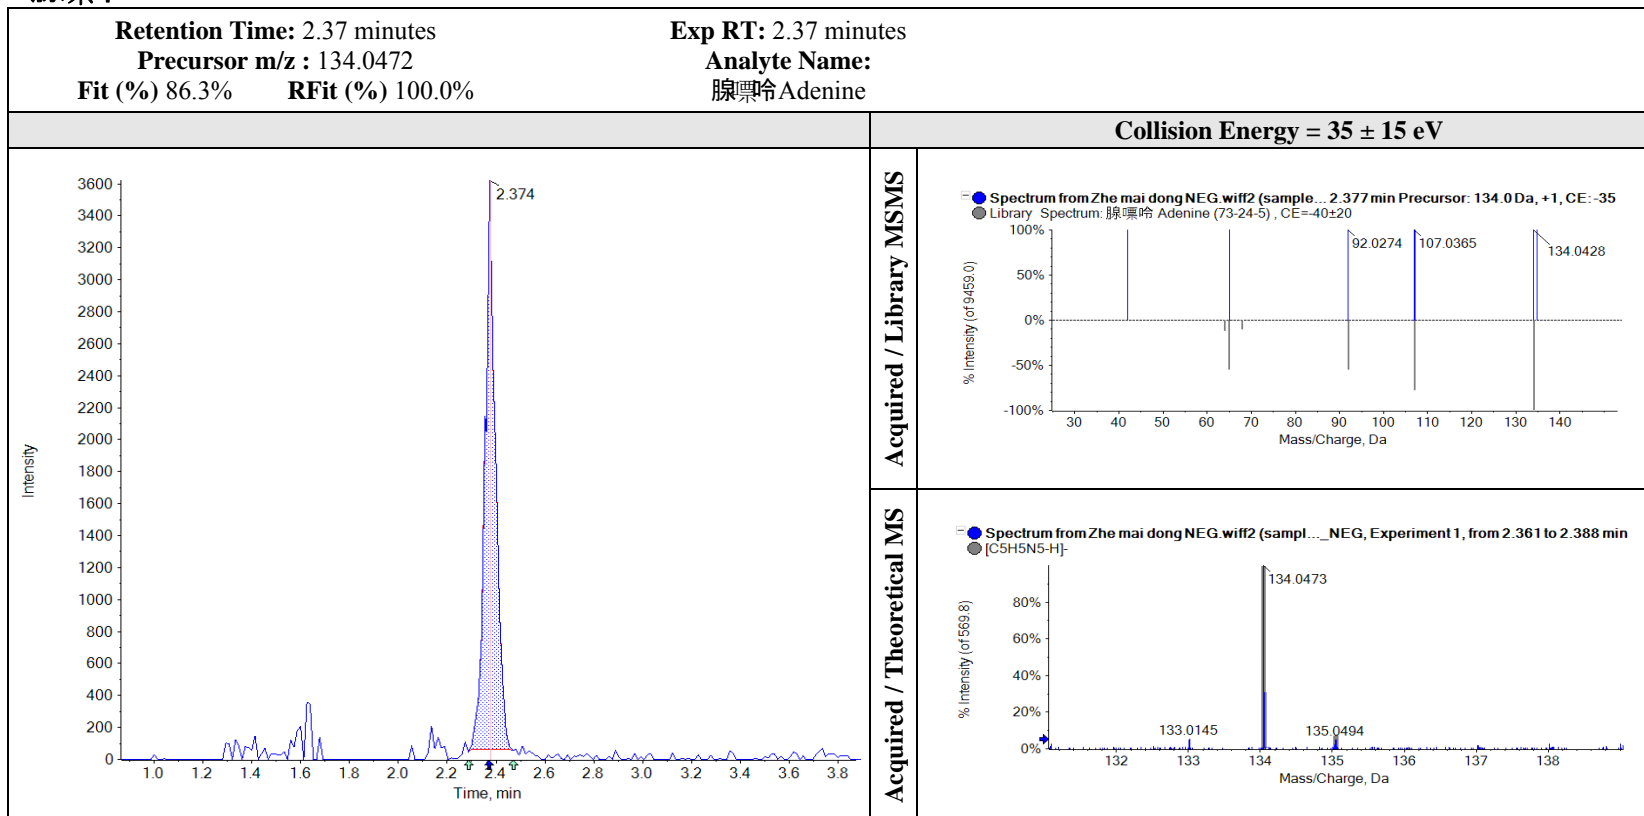

### 鸟苷 Guanosine

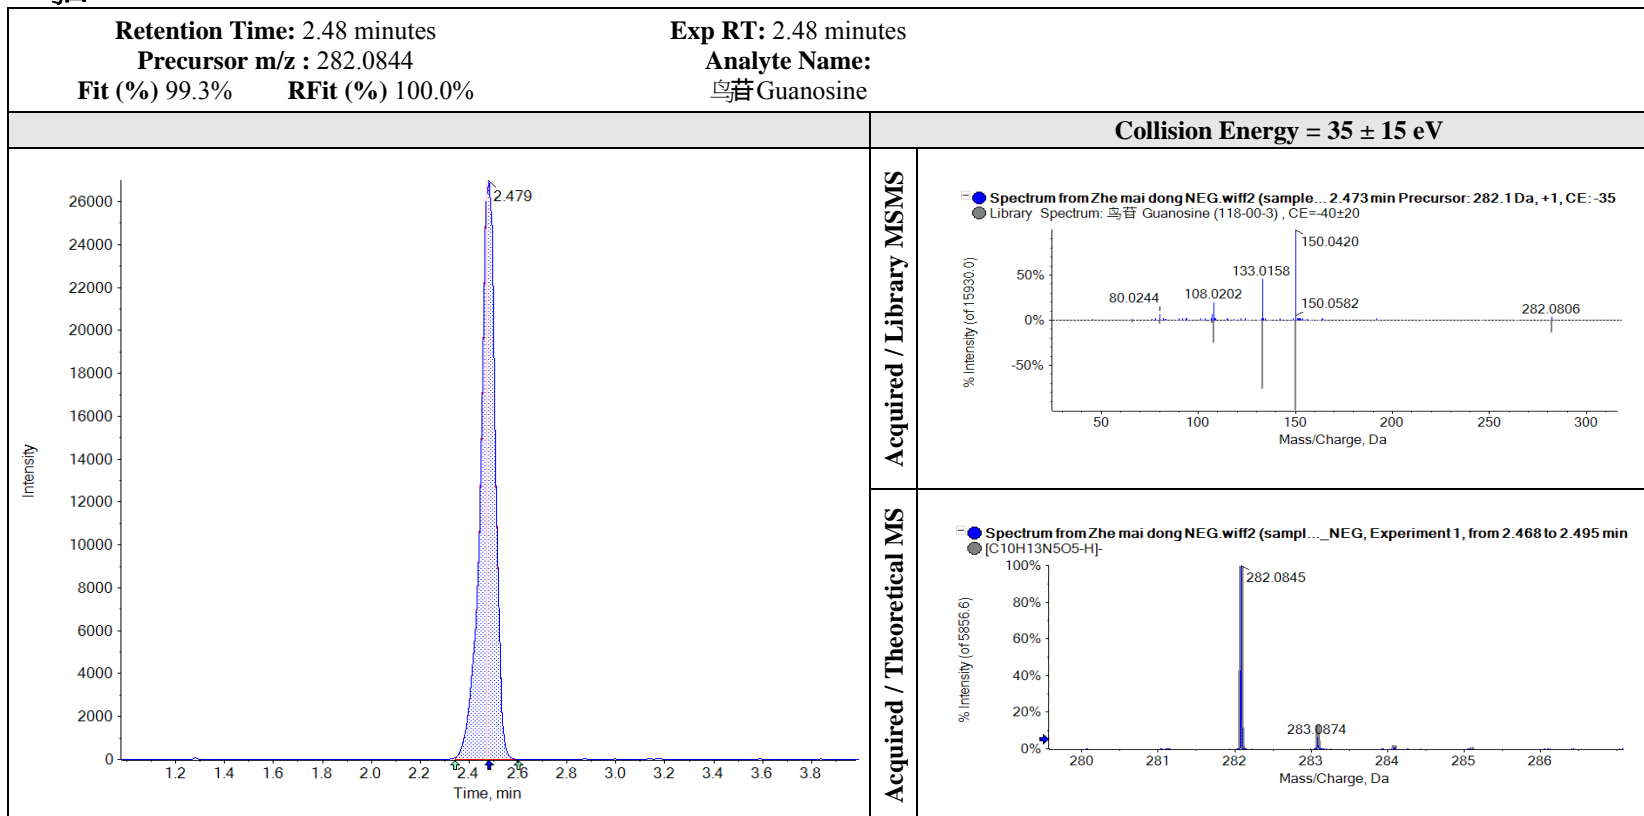

### 没食子酸 Gallic acid

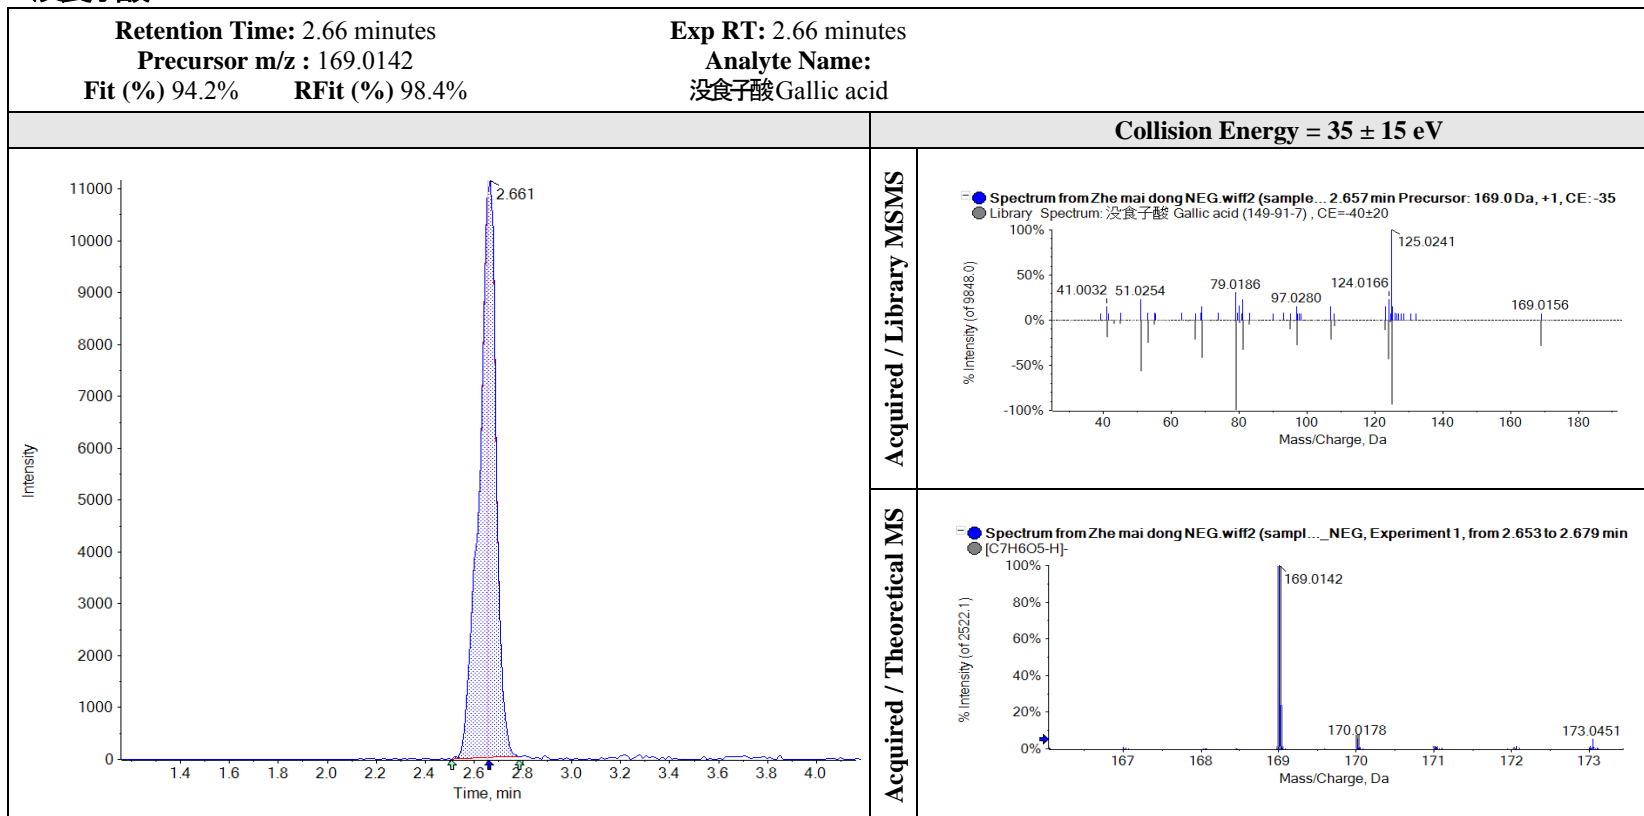

### 苯丙氨酸 Phenprobamate

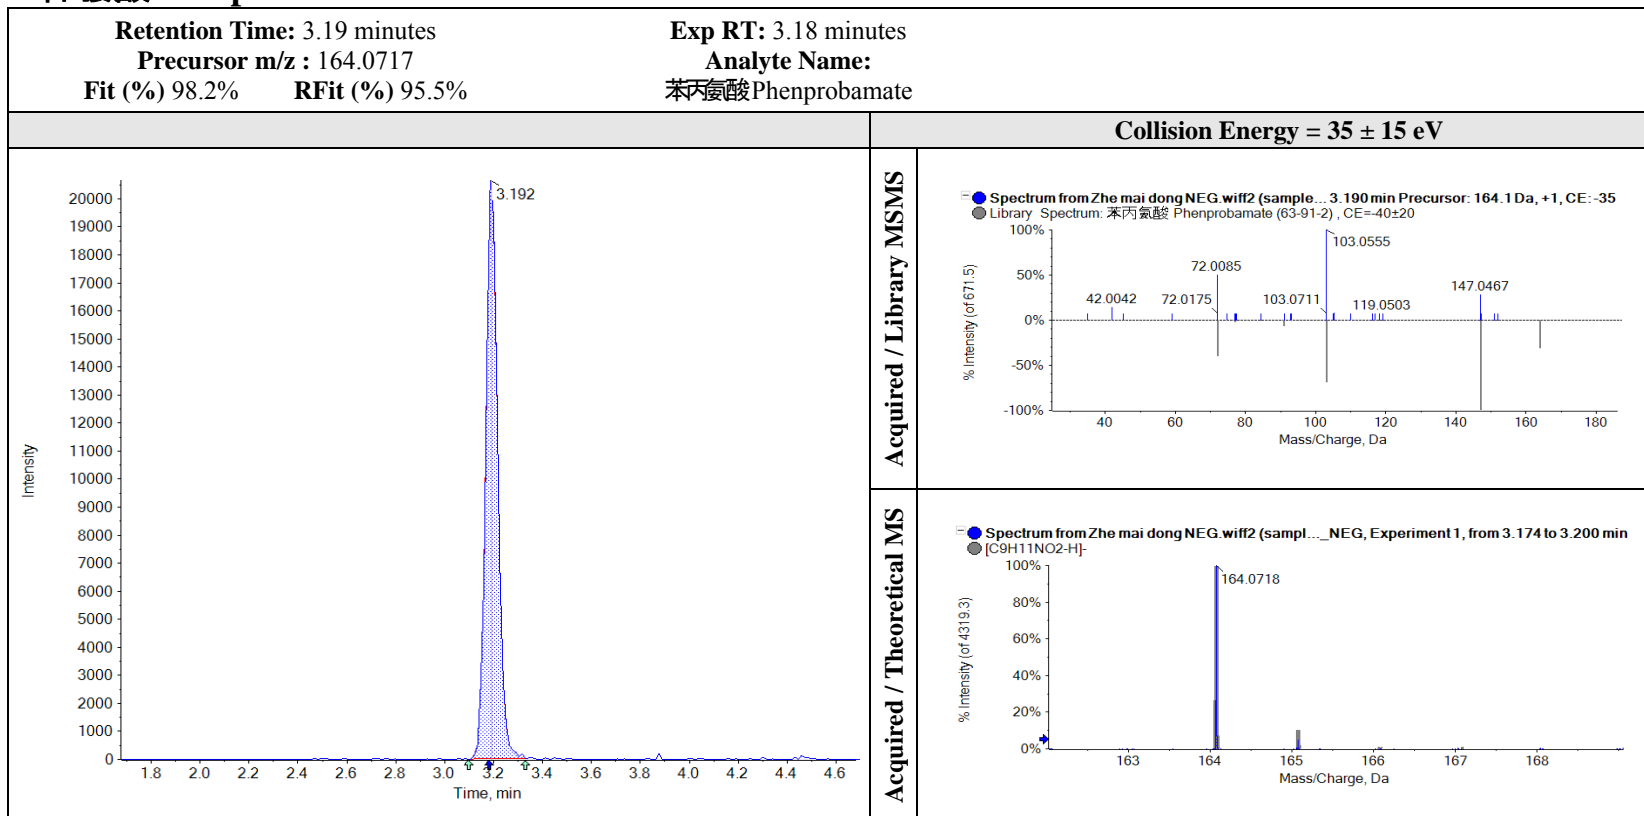

**香草酸 Vanillic acid**

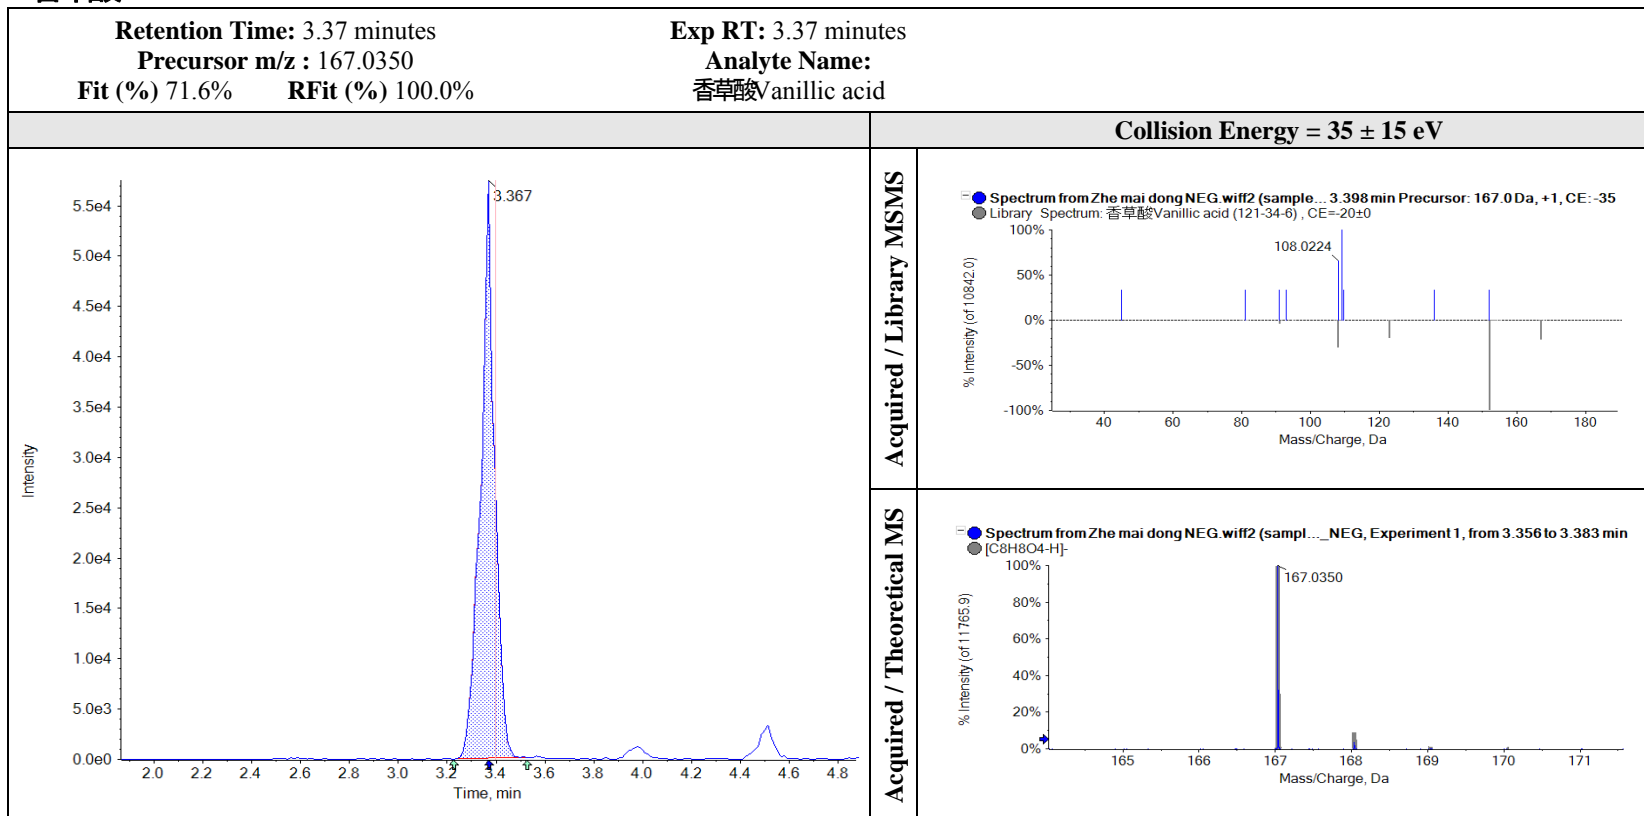

### 羟基酪醇 Hydroxytyrosol

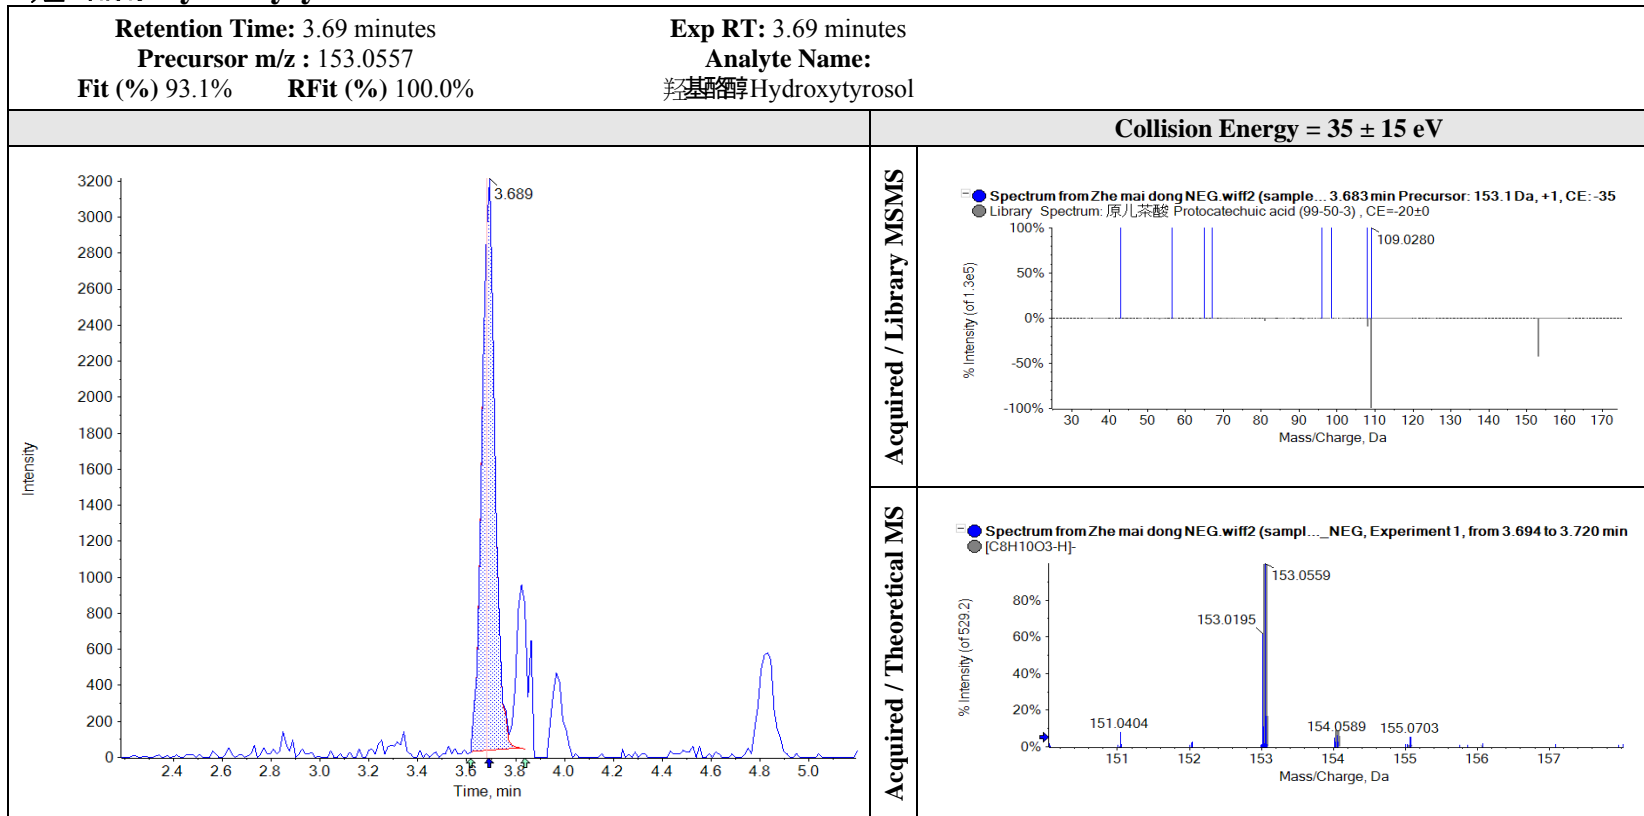



with SCIEX OS 1.3.1

Created

Printed:1/11/2021 4:55:13 PM

### 色氨酸 L-Tryptophan

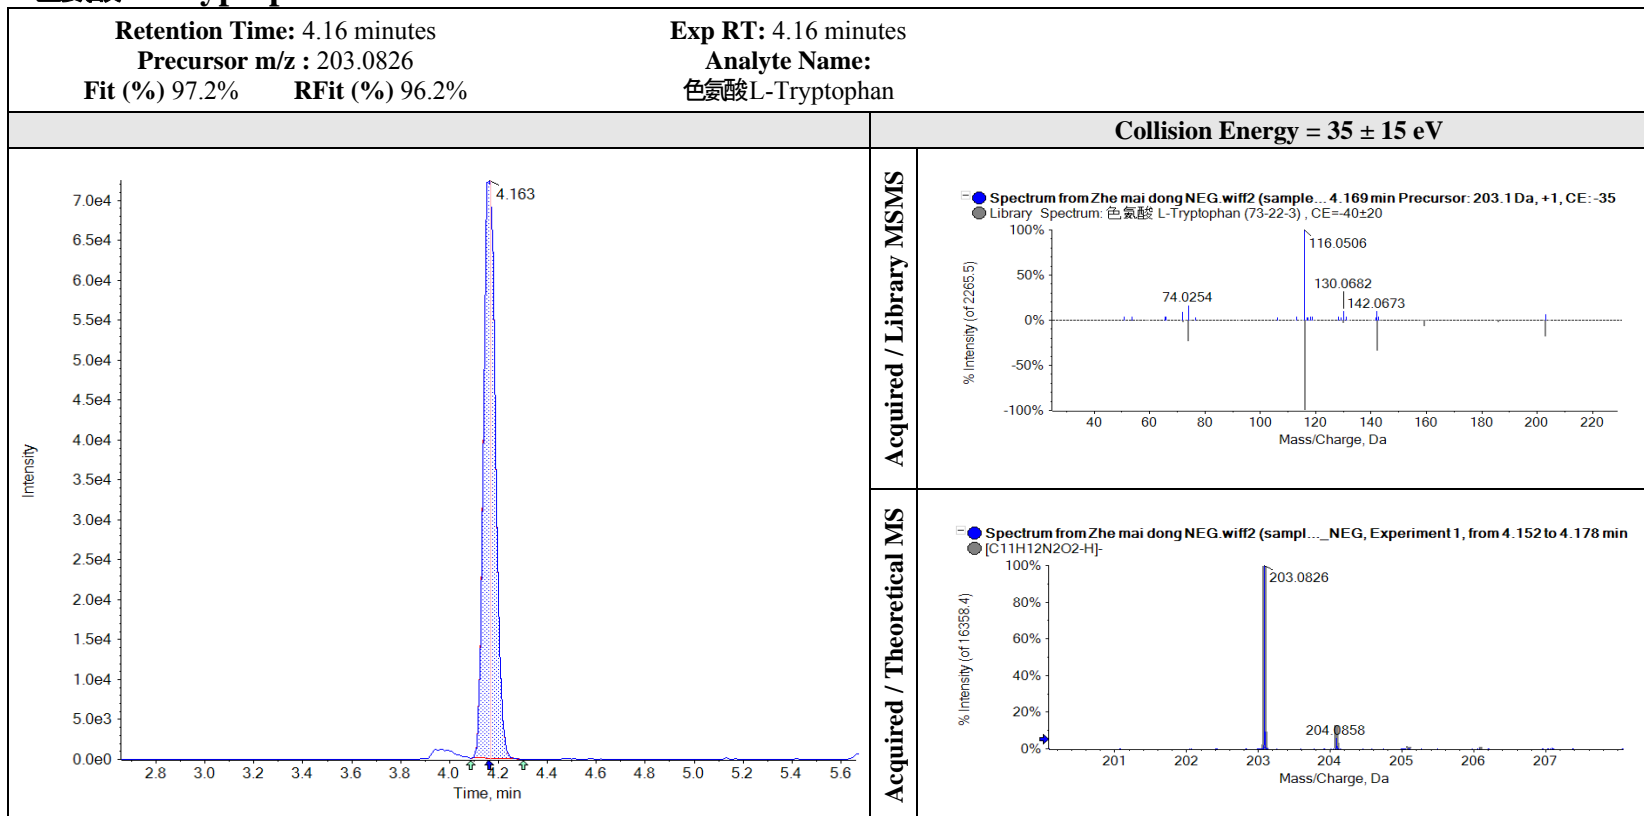



### 红景天苷 Salidroside

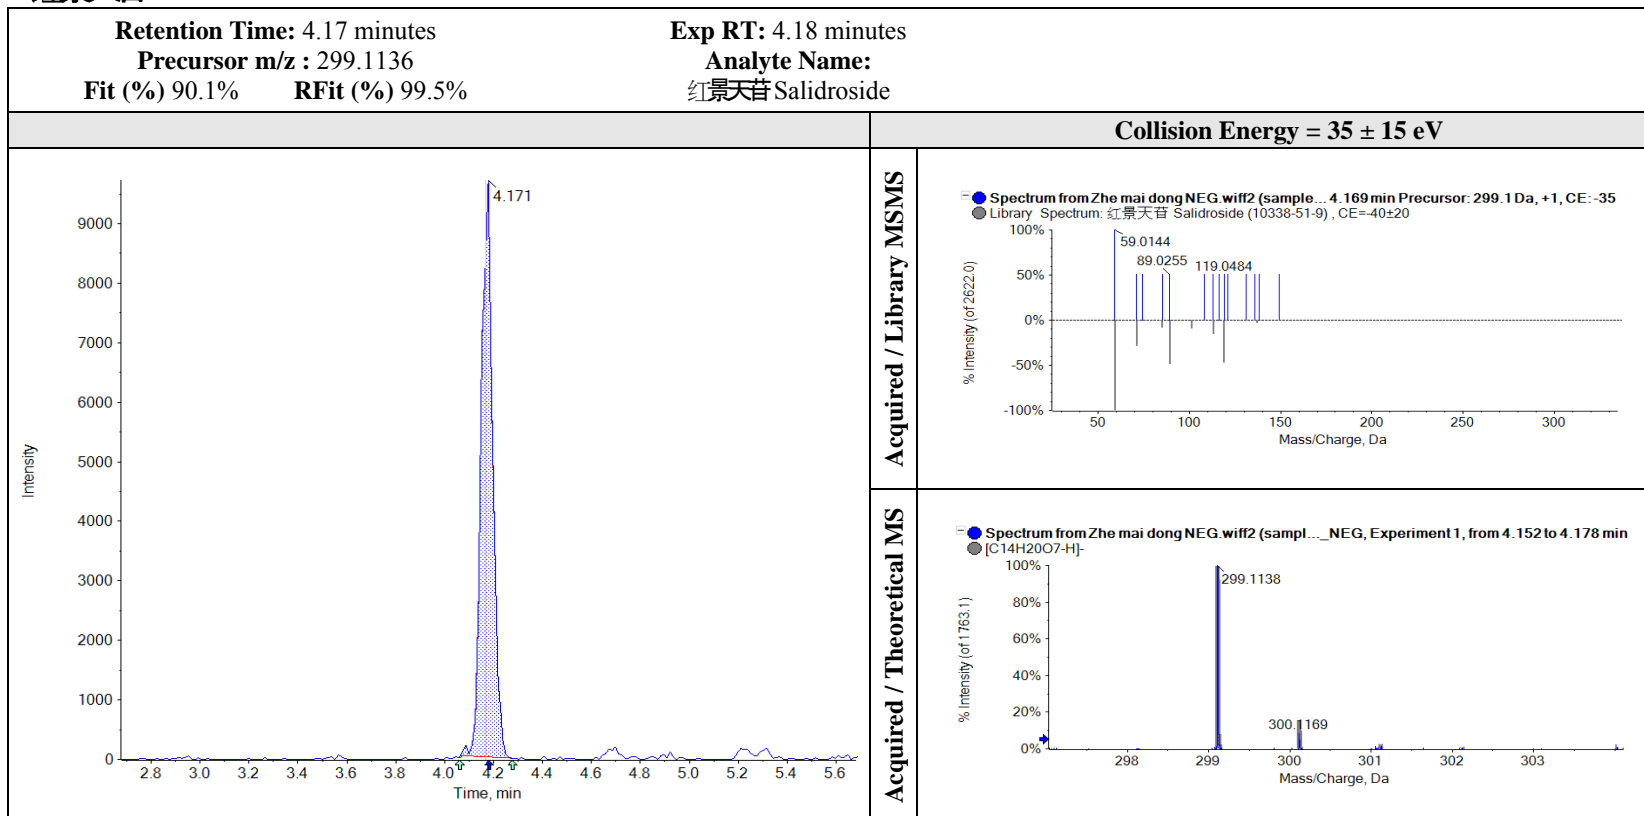

**对羟基苯甲酸 4-Hydroxybenzoic acid**

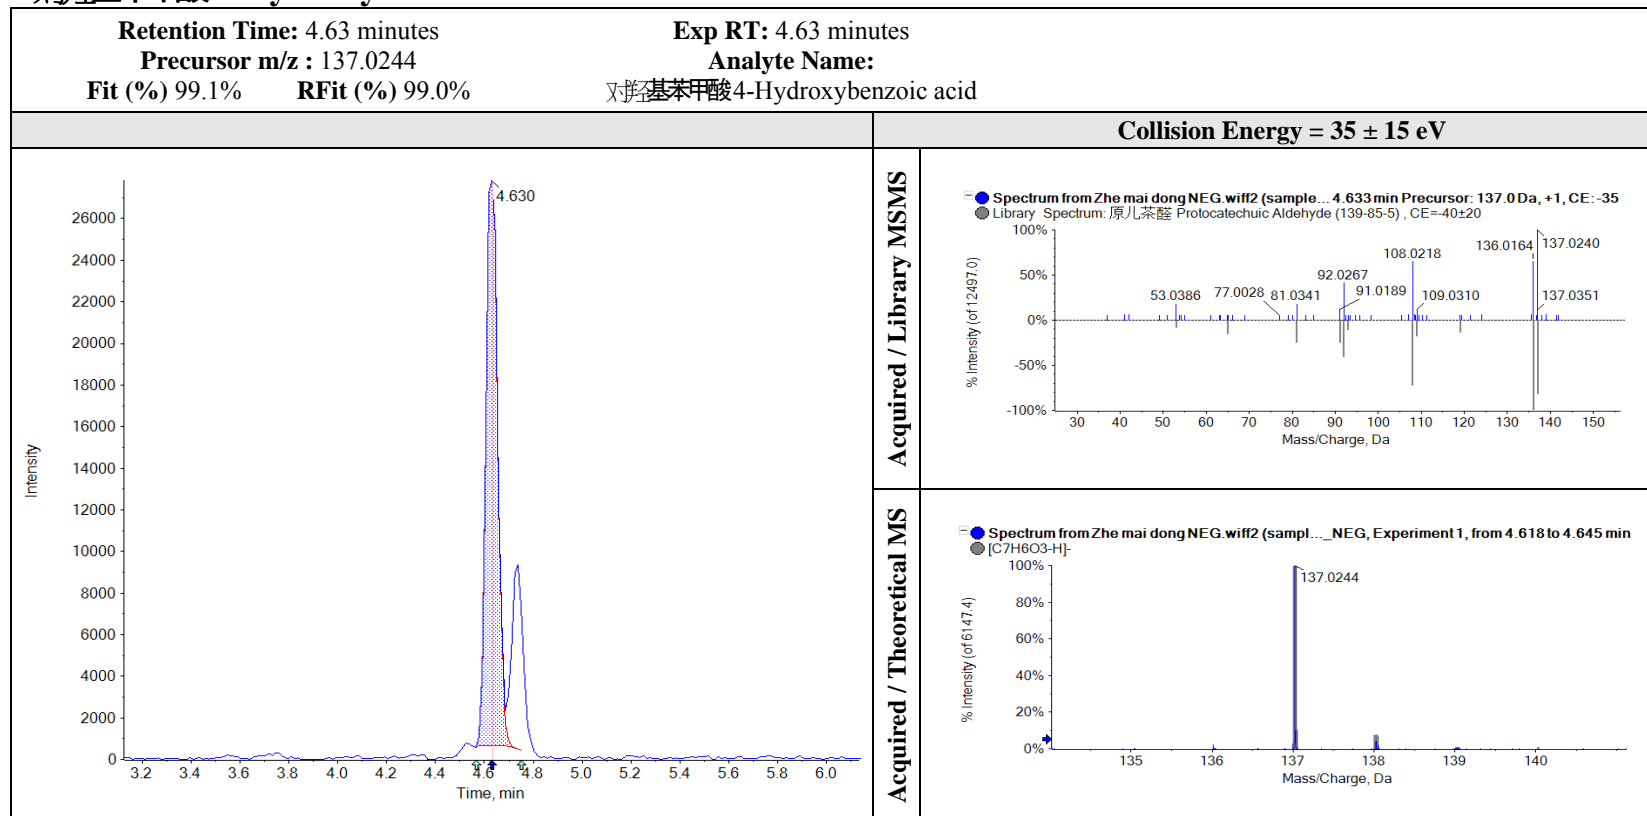

**隐绿原酸(5-咖啡酰奎宁酸) 4-O-Caffeoyl Quinic acid**

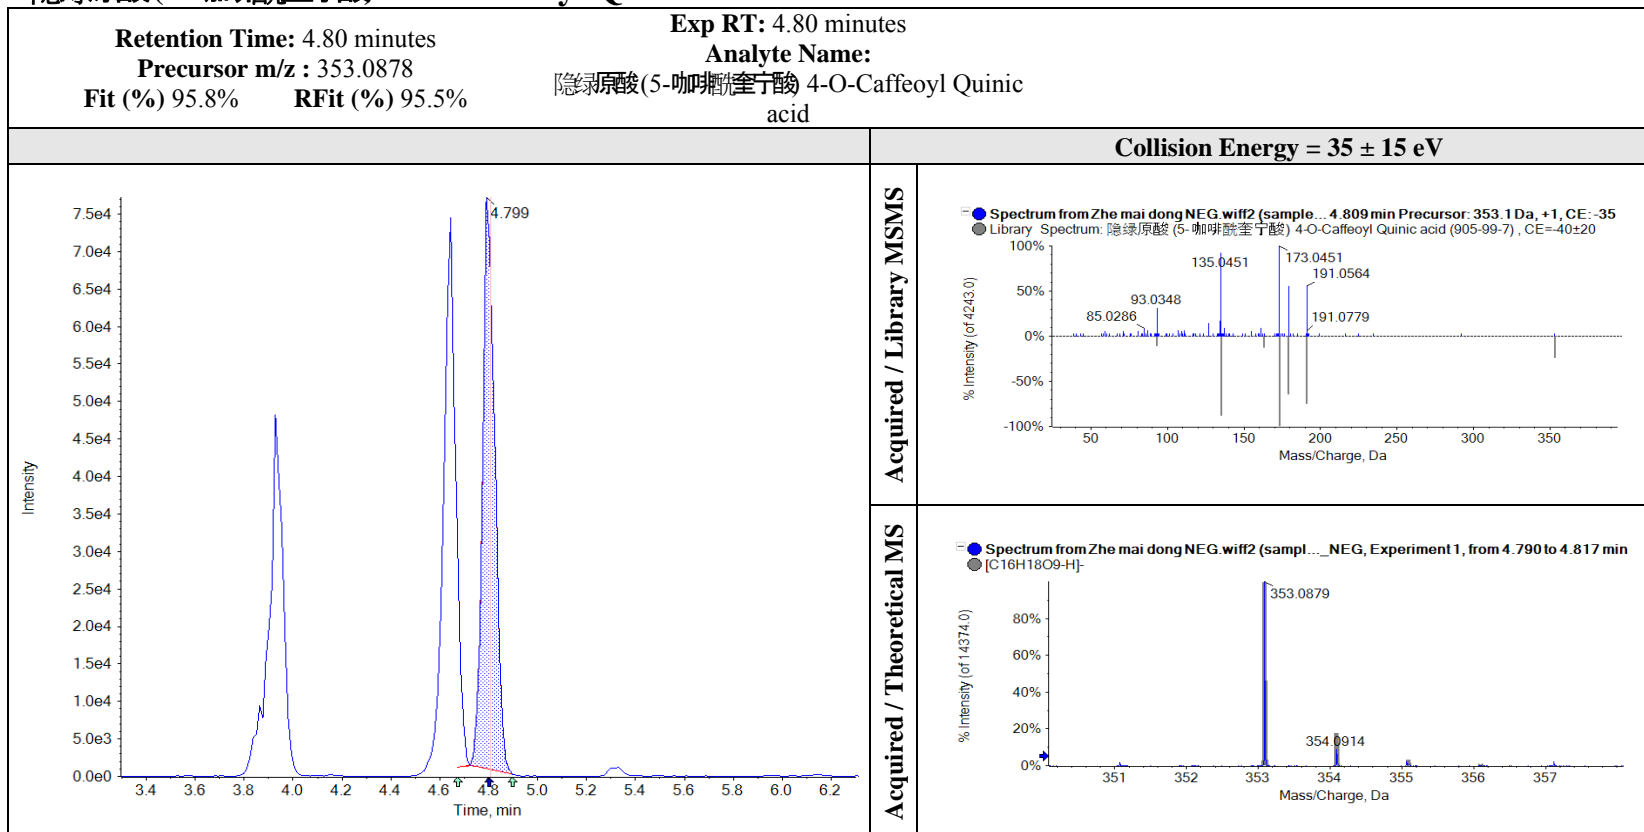

### 秦皮乙素 Esculetin

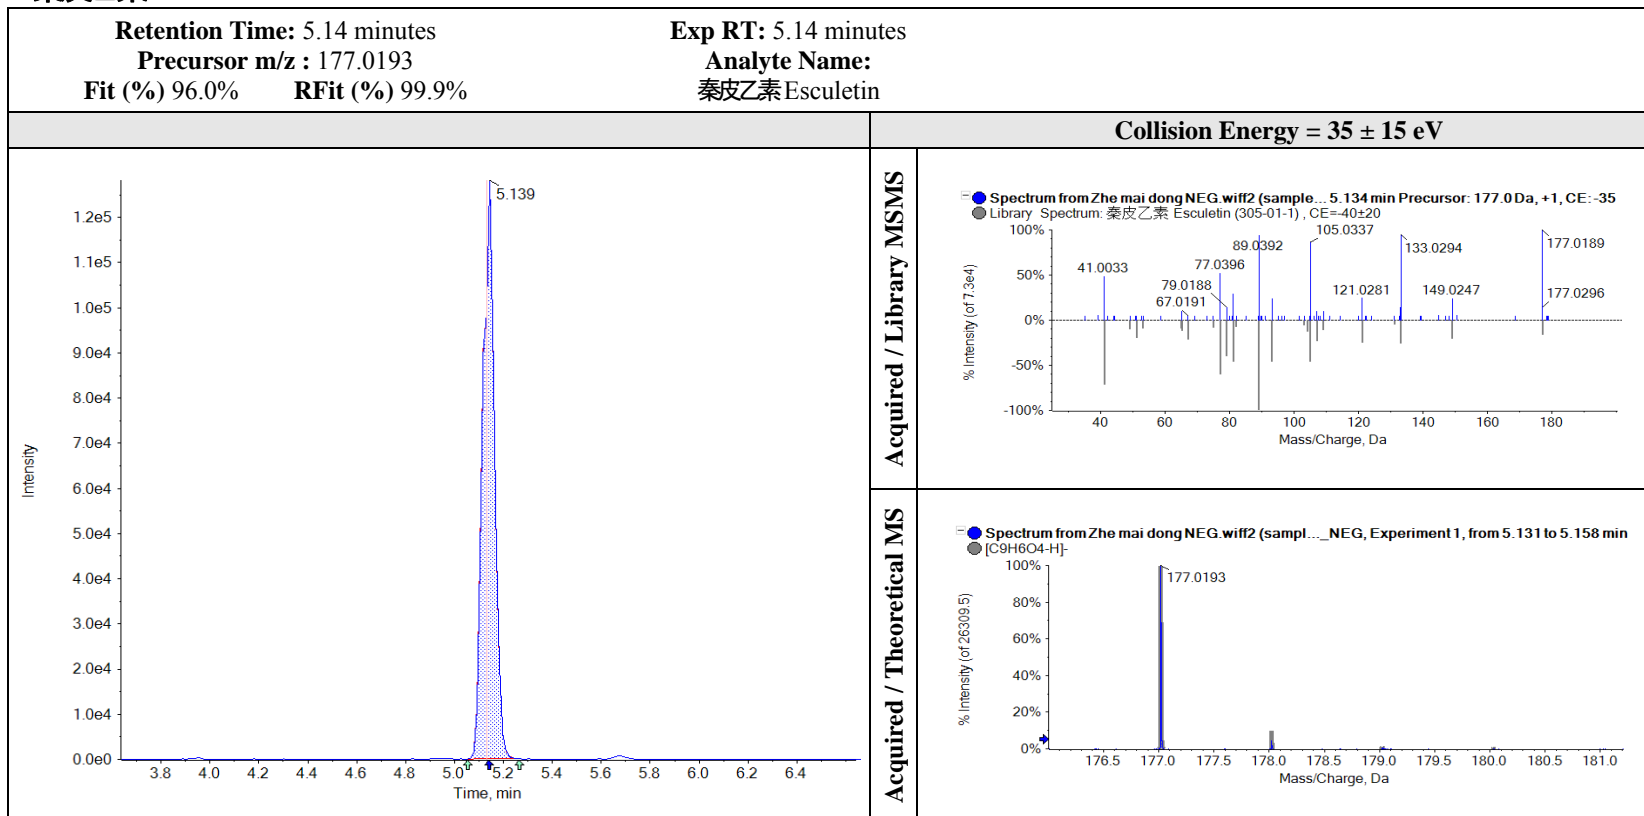

### 咖啡酸 Caffeic acid

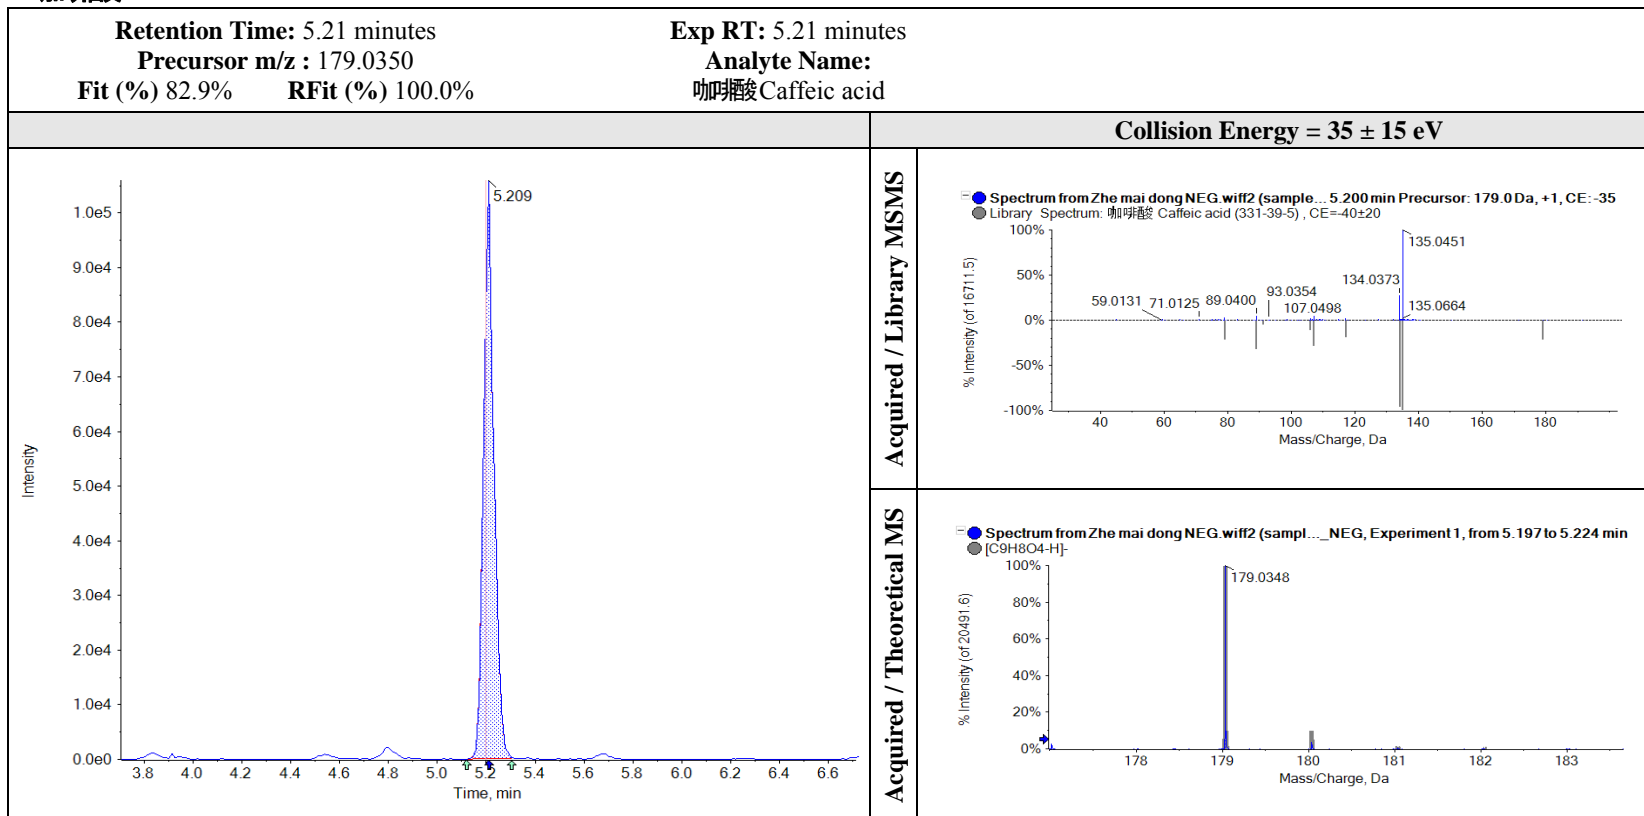

### 刺五加苷E Eleutheroside E

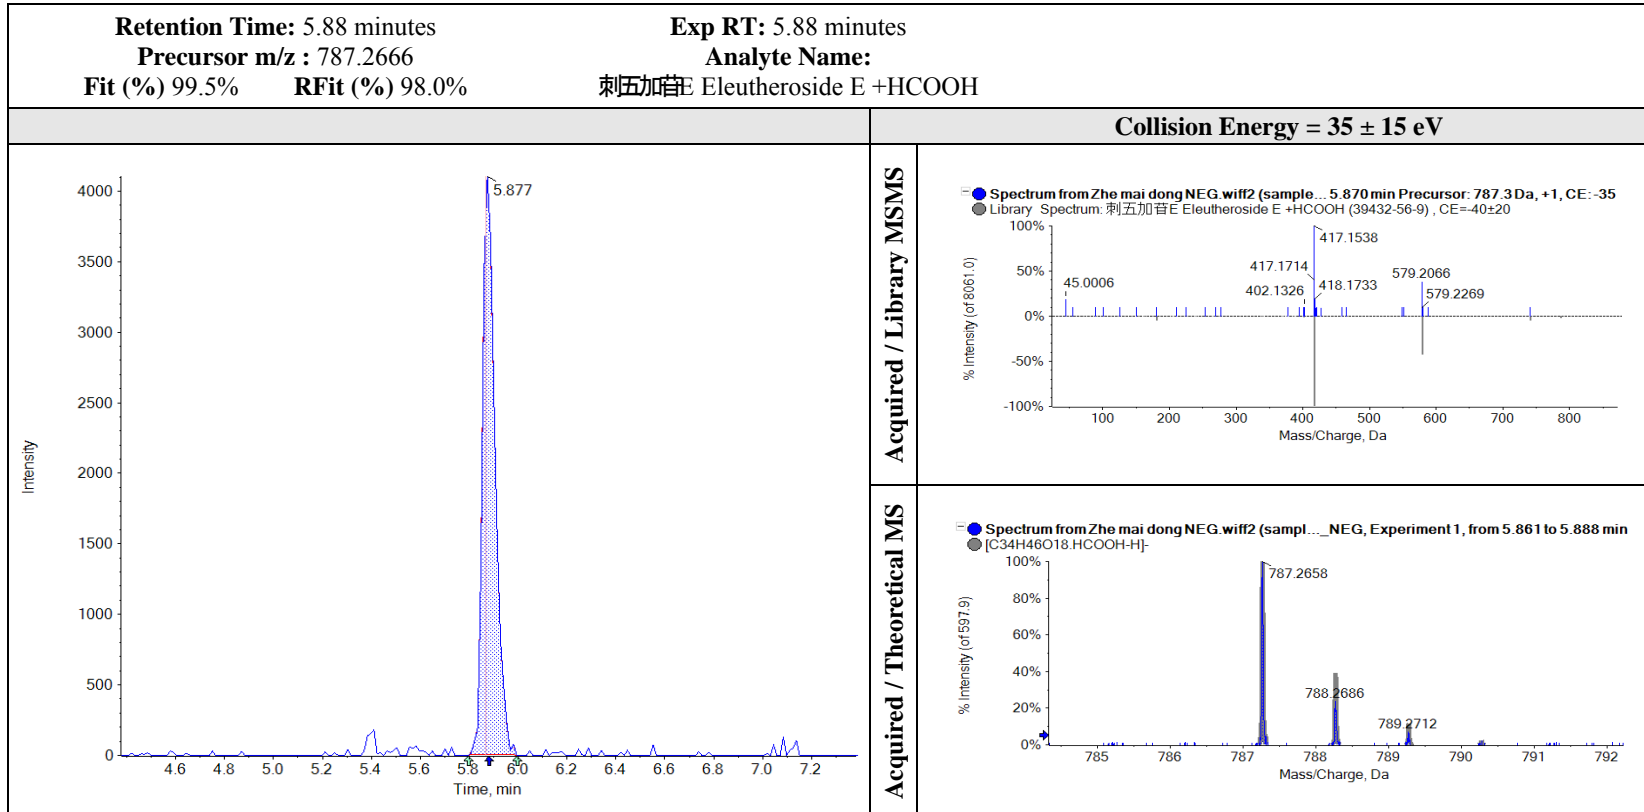

### 芦丁Rutin

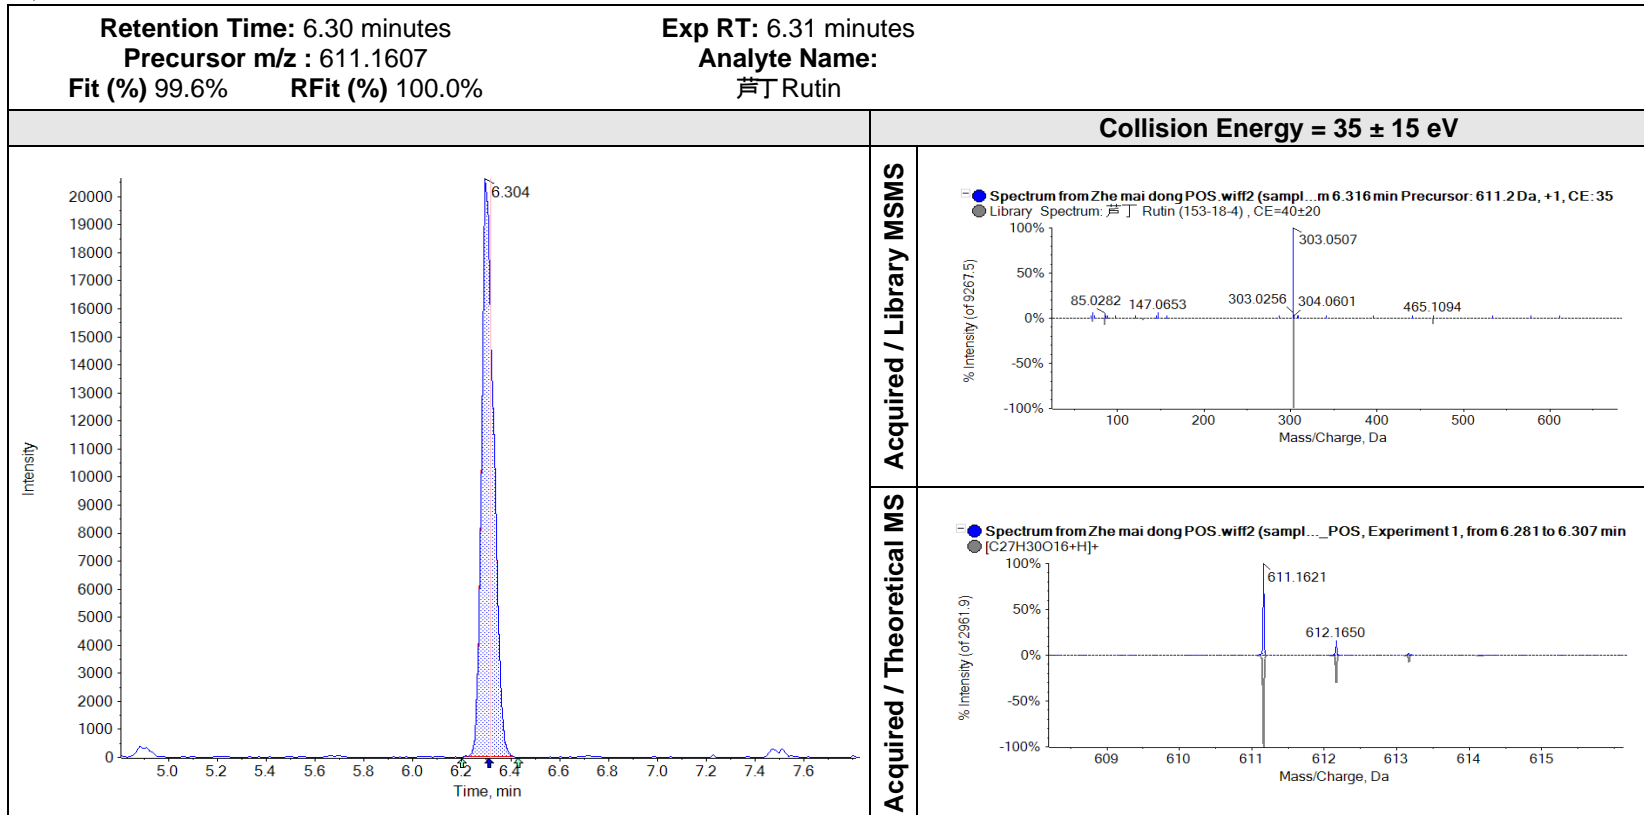

### 金丝桃苷 Hyperin

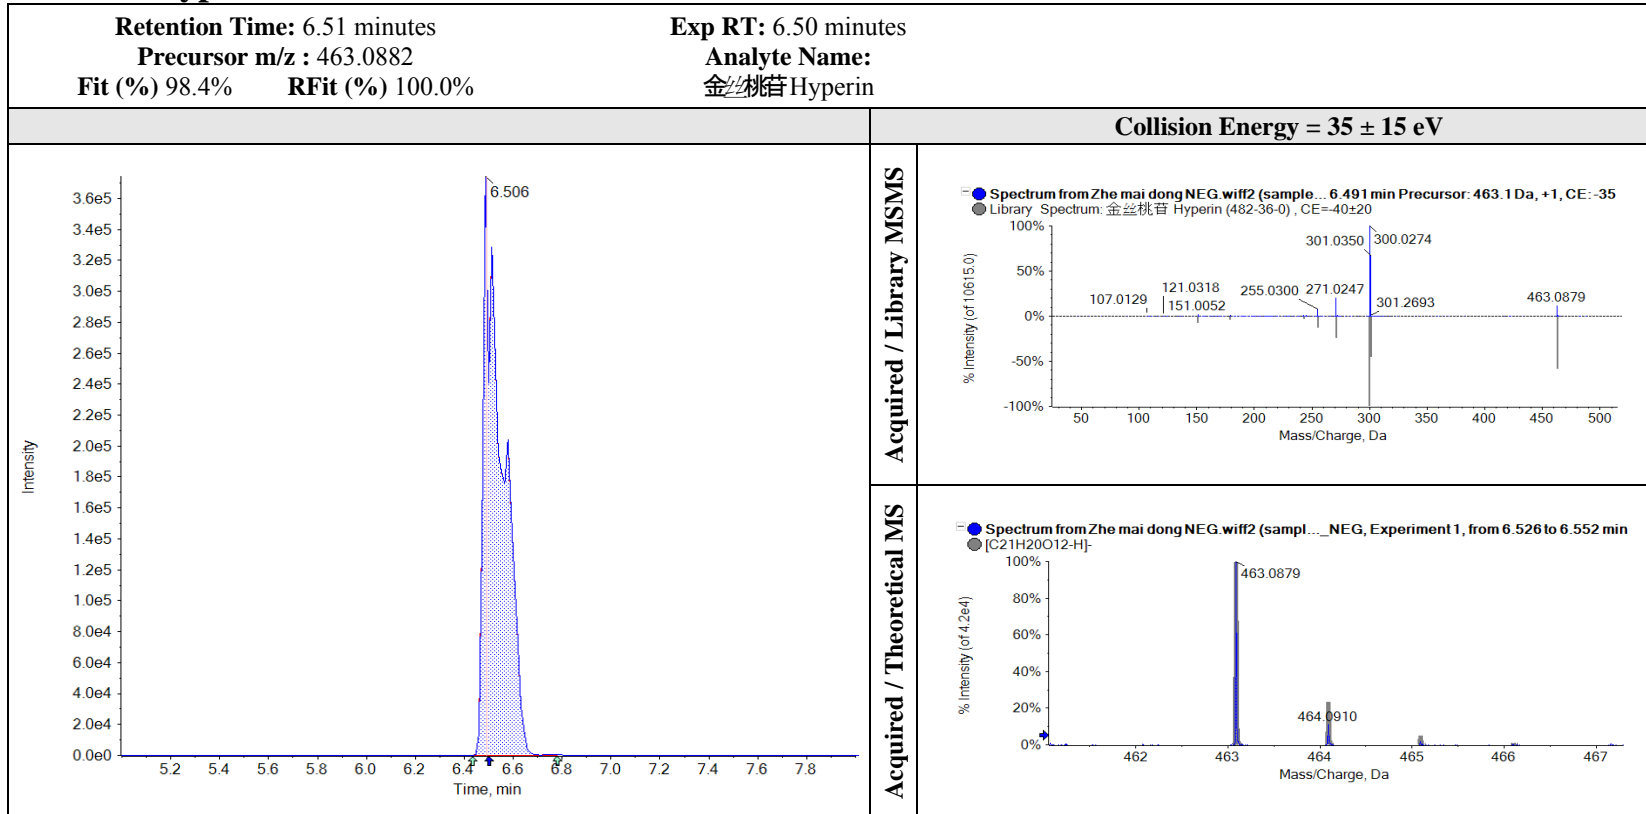



### 紫云英苷 Astragalin

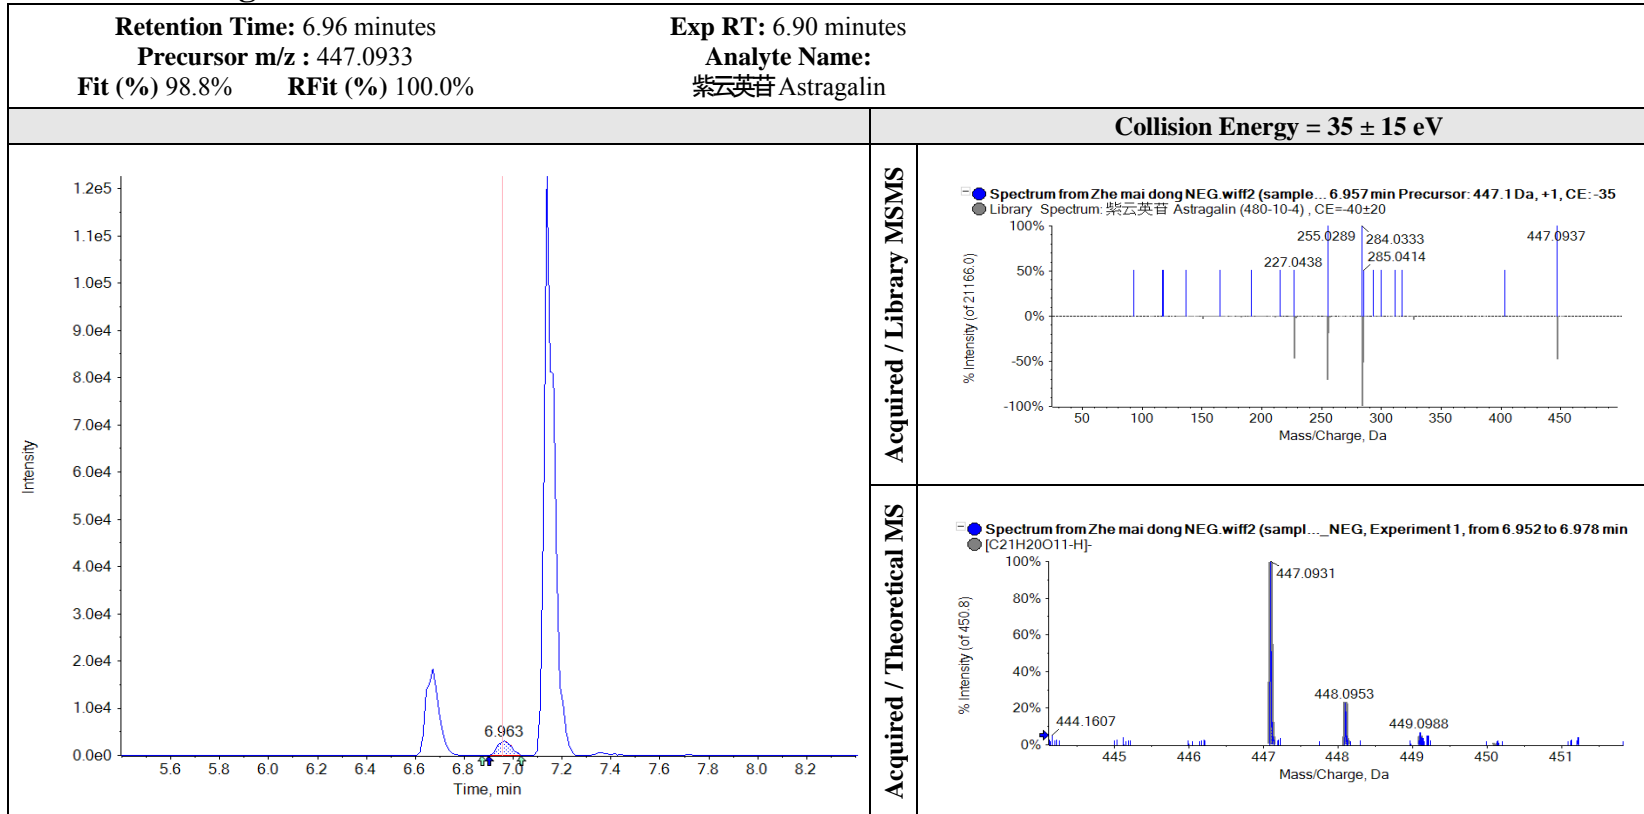

### 特女贞苷 Specnuezhenide

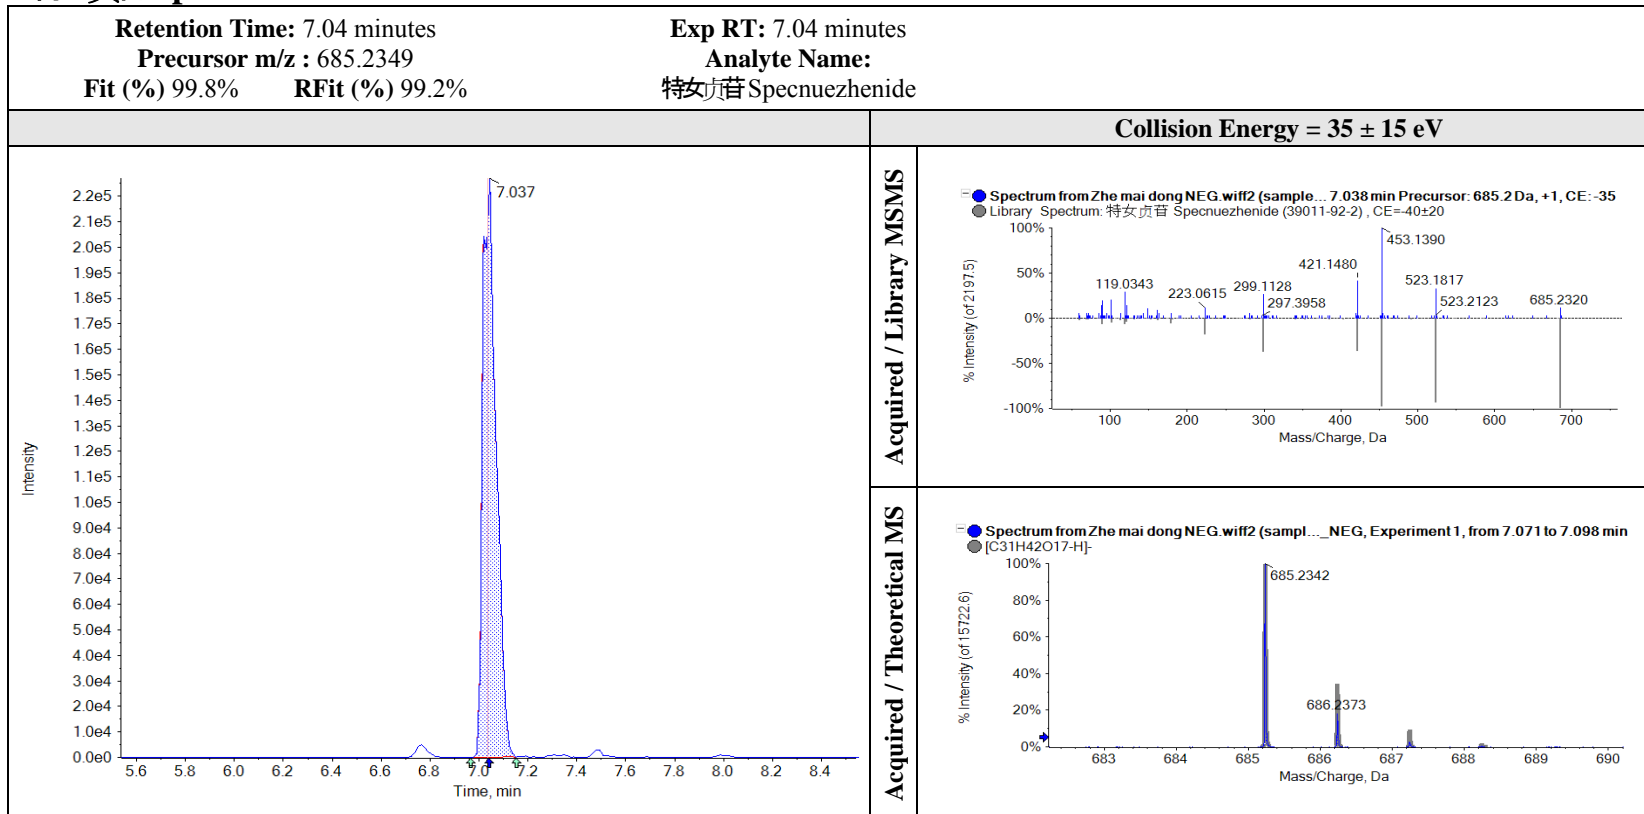

### 芸香柚皮苷 Narirutin

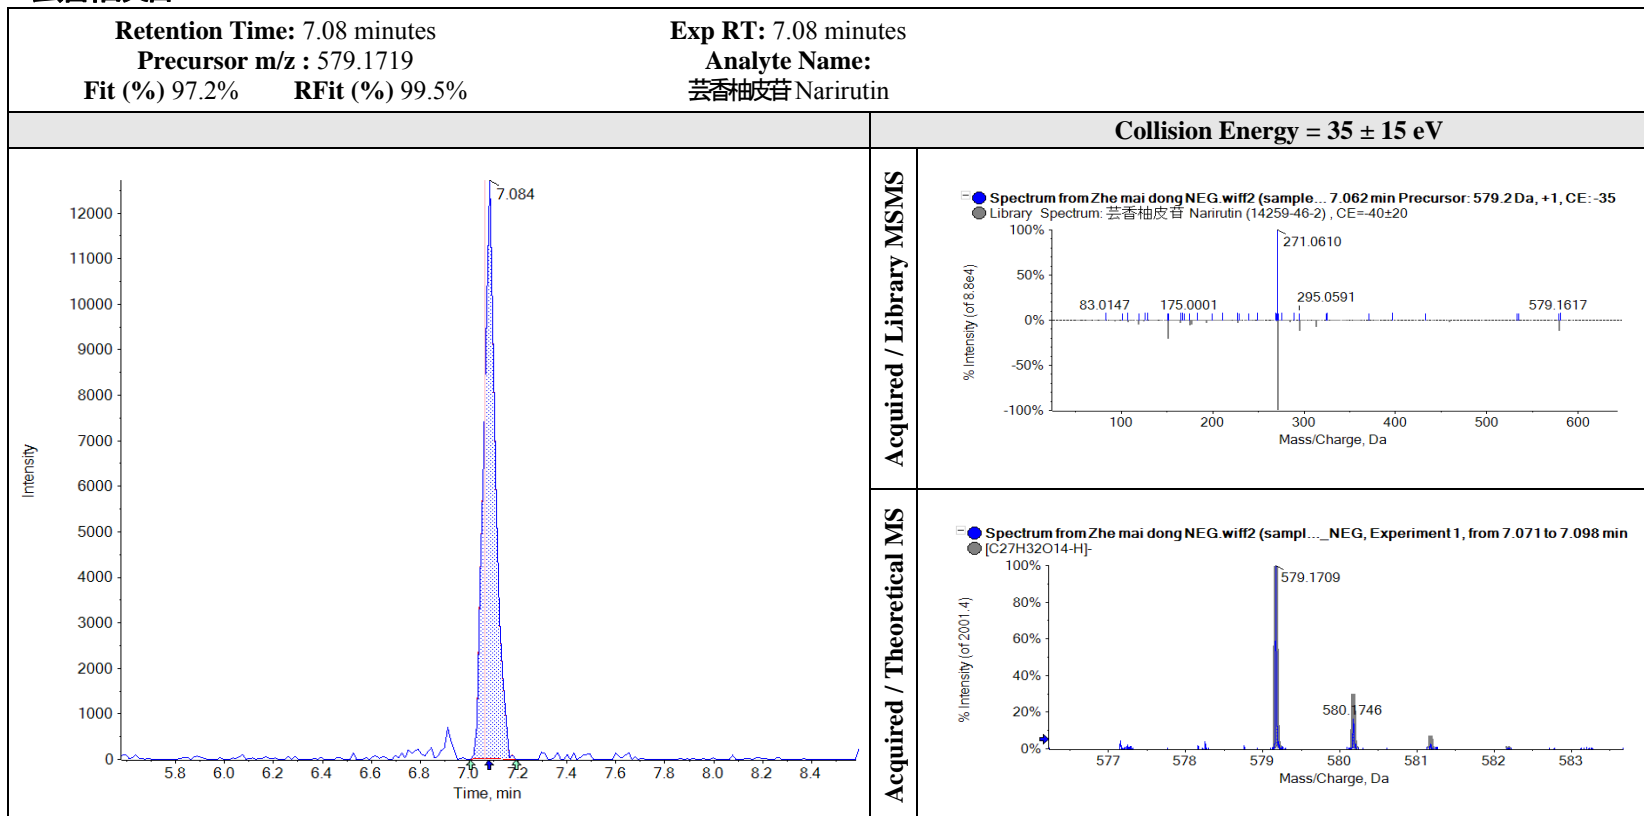

### 1,5-二咖啡酰奎宁酸 1,5-Dicaffeoylquinic acid

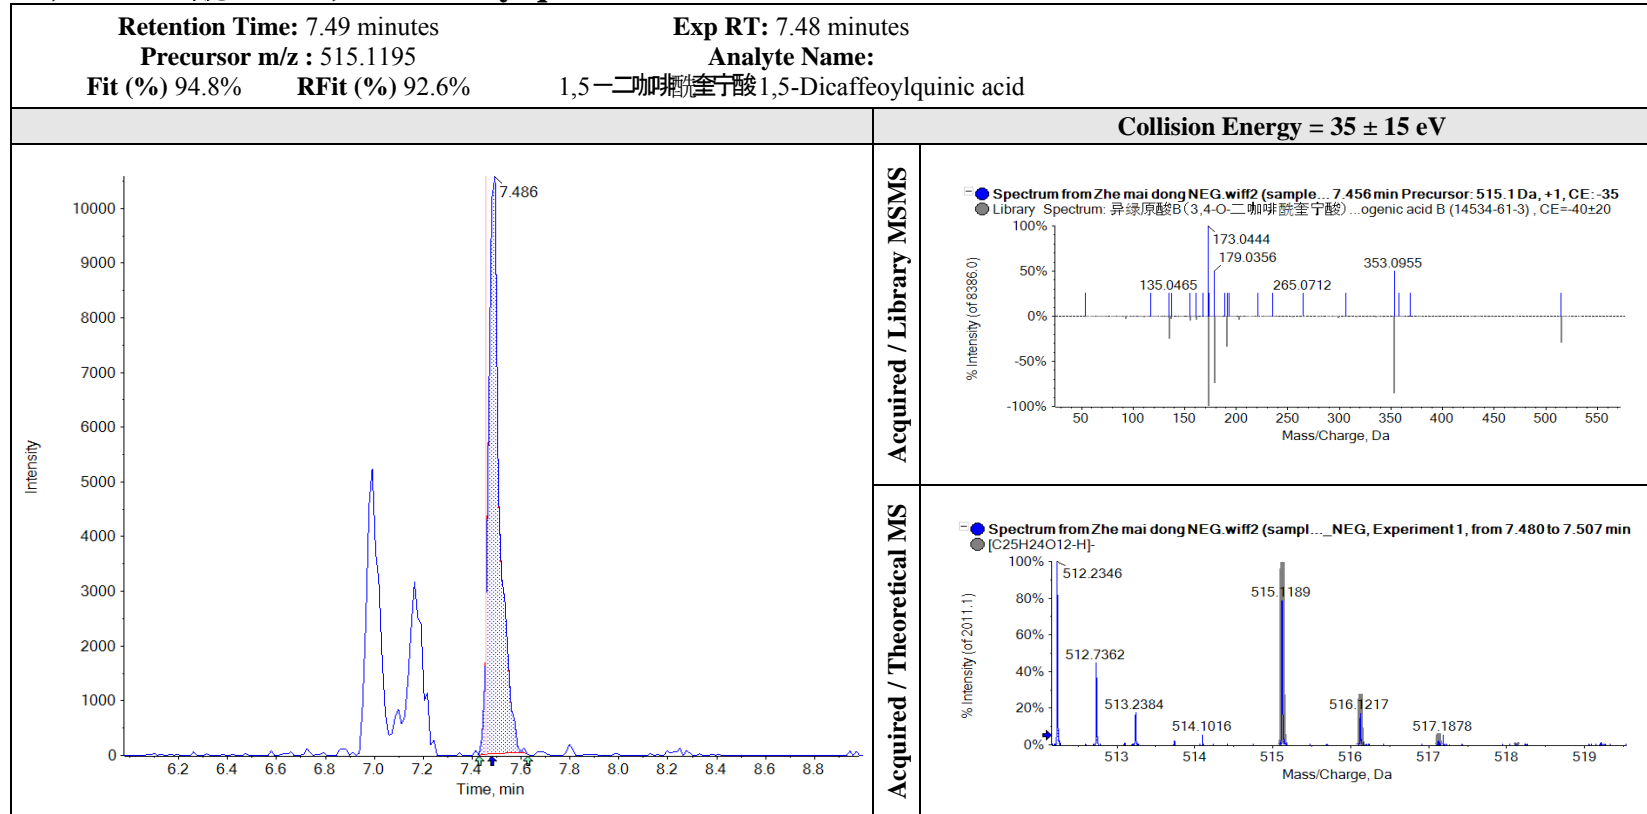

橙皮苷 Hesperidin

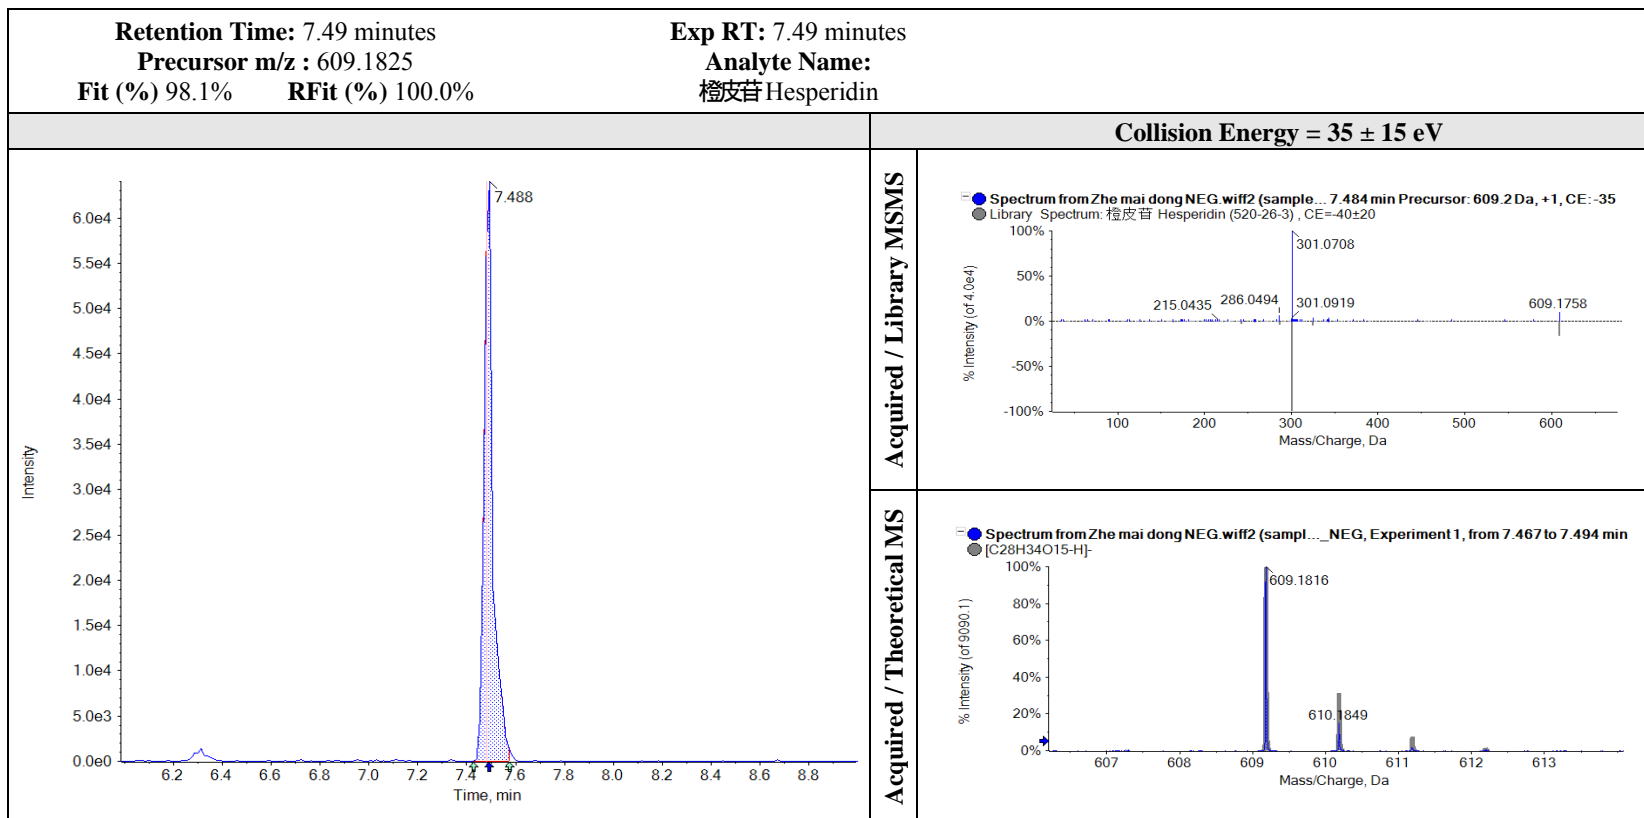

槲皮素 Quercetin

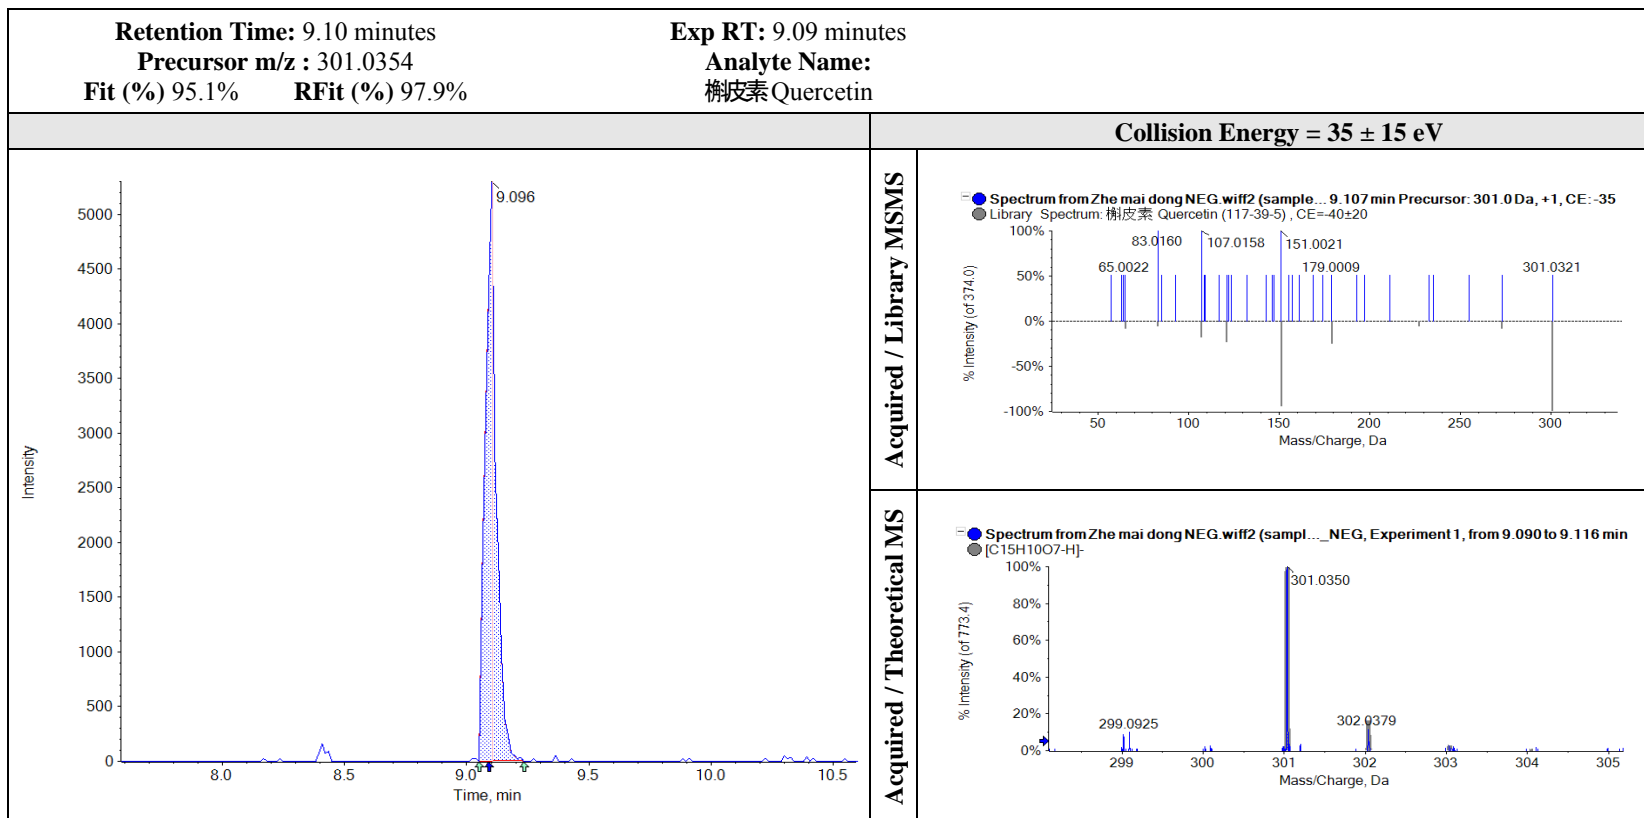

### 毛蕊异黄酮苷 Calycosin-7-o-glucoside

|                                                                                                                                    |                                  |                                                                                                                                                                                                      |  |
|------------------------------------------------------------------------------------------------------------------------------------|----------------------------------|------------------------------------------------------------------------------------------------------------------------------------------------------------------------------------------------------|--|
| <p><b>Retention Time:</b> 9.43 minutes<br/> <b>Precursor m/z :</b> 491.1195<br/> <b>Fit (%)</b> 99.7%    <b>RFit (%)</b> 98.1%</p> |                                  | <p><b>Exp RT:</b> 9.42 minutes<br/> <b>Analyte Name:</b><br/>         毛蕊异黄酮苷 Calycosin-7-o-glucoside<br/>         +HCOOH</p>                                                                         |  |
|                                                                                                                                    |                                  | <b>Collision Energy = 35 ± 15 eV</b>                                                                                                                                                                 |  |
|                                                                                                                                    | <b>Acquired / Library MSMS</b>   | <p>● Spectrum from Zhe mai dong NEG.wiff2 (sample... 9.434 min Precursor: 491.1 Da, +1, CE: -35)<br/>         ● Library Spectrum: 毛蕊异黄酮苷 Calycosin-7-o-glucoside +HCOOH (20633-67-4) , CE=-40±20</p> |  |
|                                                                                                                                    | <b>Acquired / Theoretical MS</b> | <p>● Spectrum from Zhe mai dong NEG.wiff2 (sampl..._NEG, Experiment 1, from 9.403 to 9.429 min)<br/>         ● [C22H22O10.HCOOH-H]-</p>                                                              |  |

### 芹菜素 Apigenin

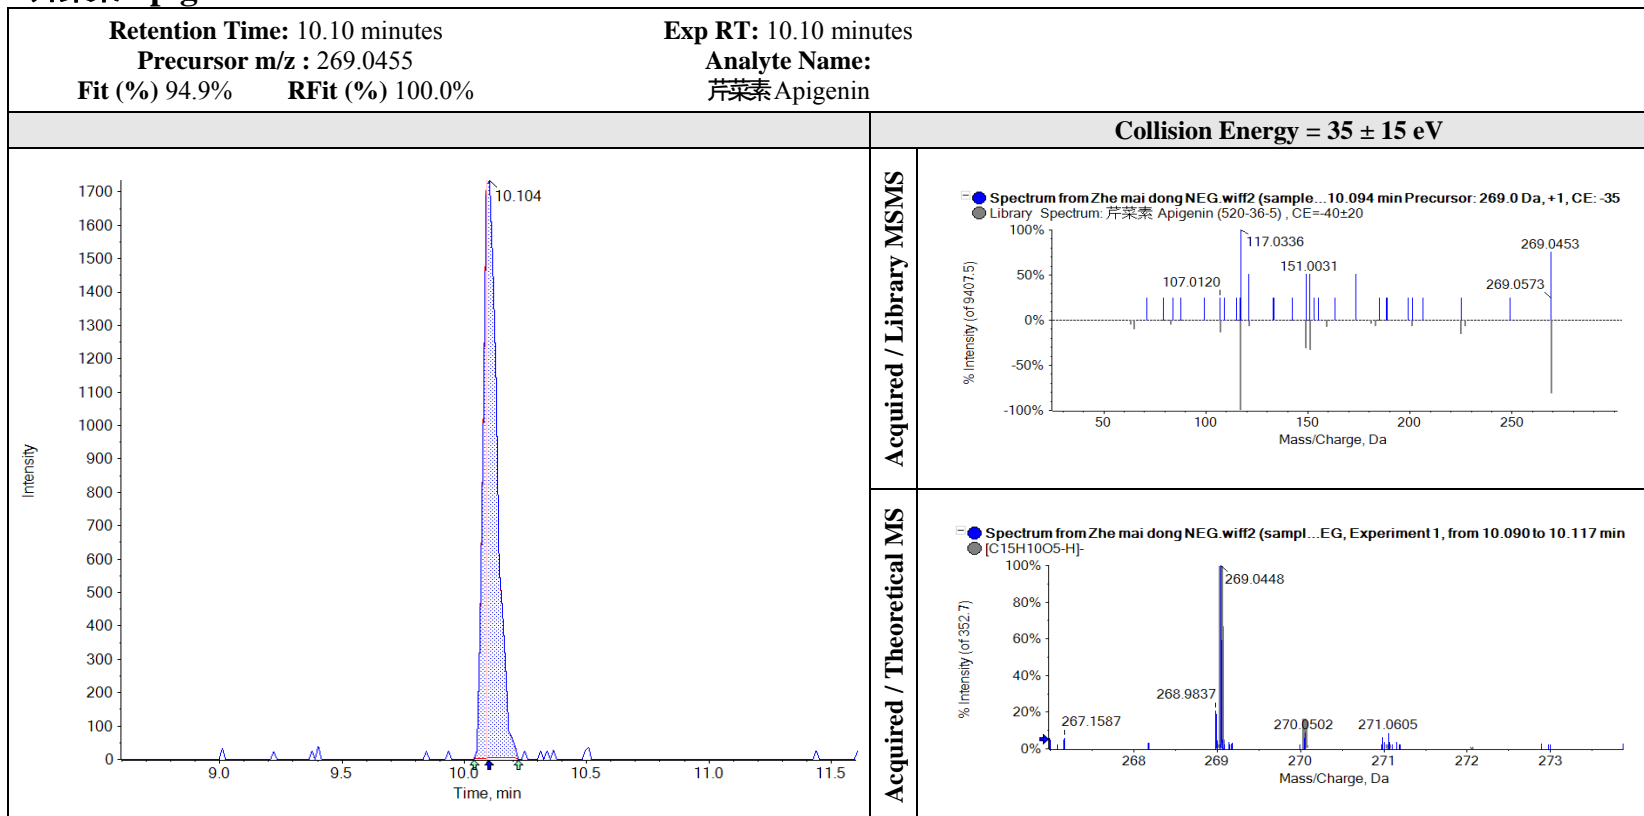



对羟基苯甲酸丁酯 Butylparaben

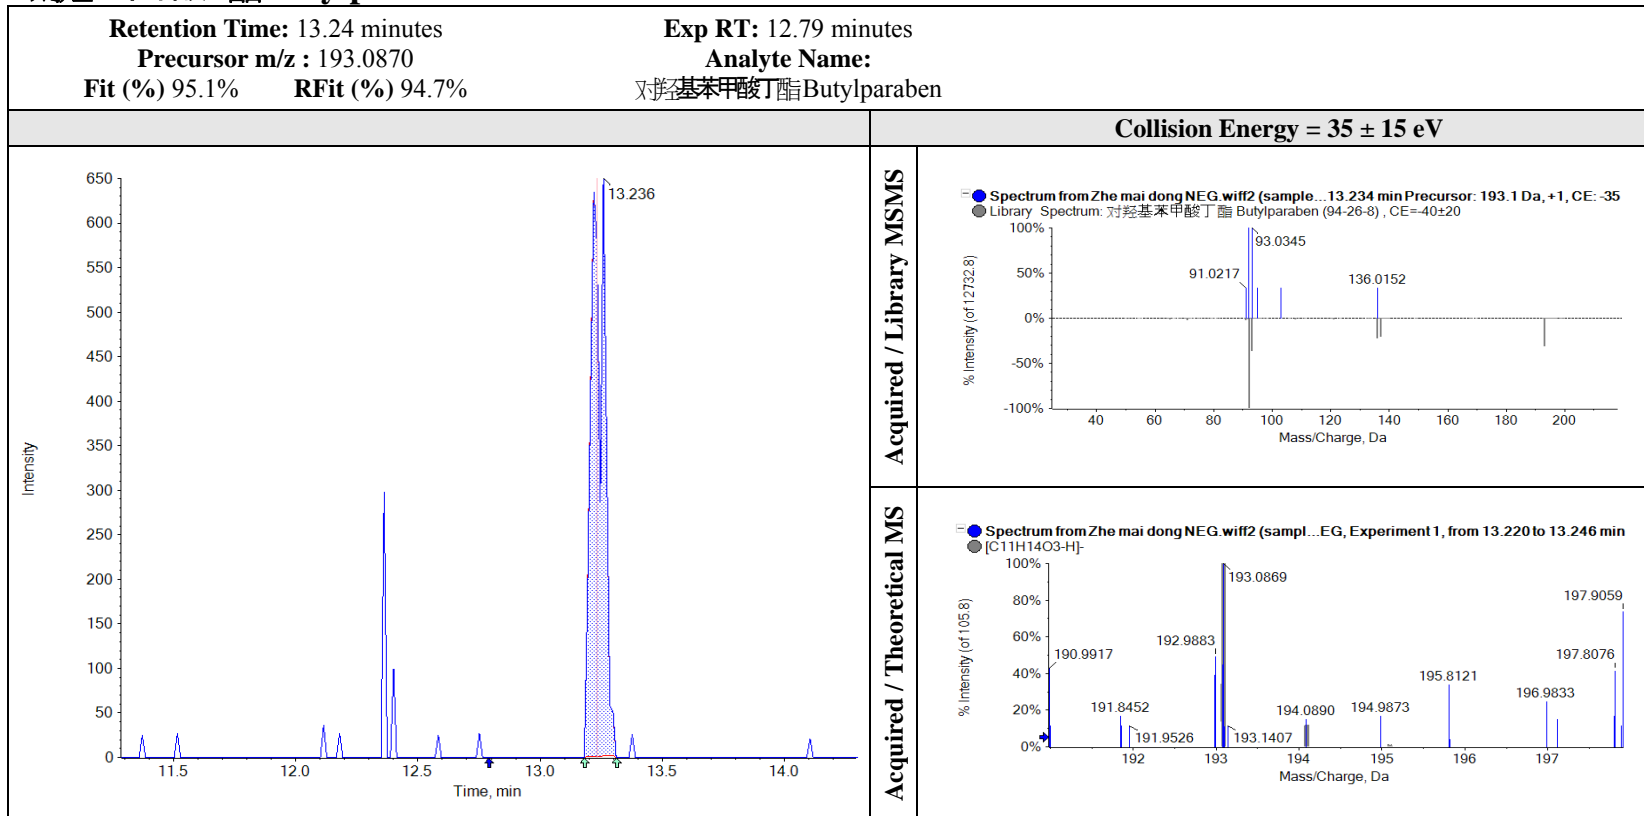

### 短葶山麦冬皂苷 C Liriope muscari baily saponins C

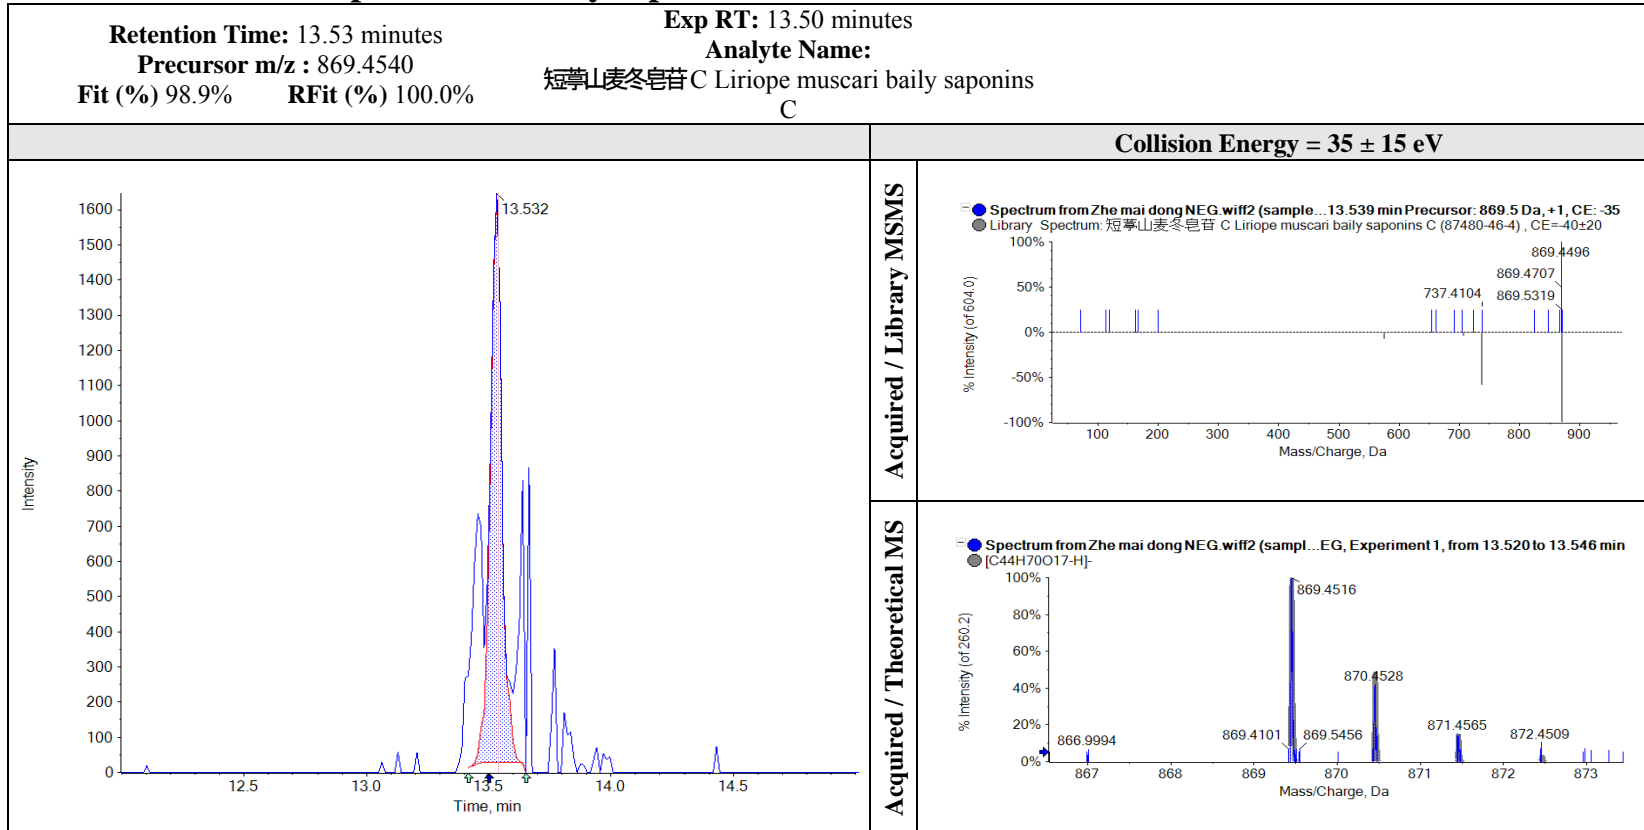

**积雪草酸 Asiatic acid**

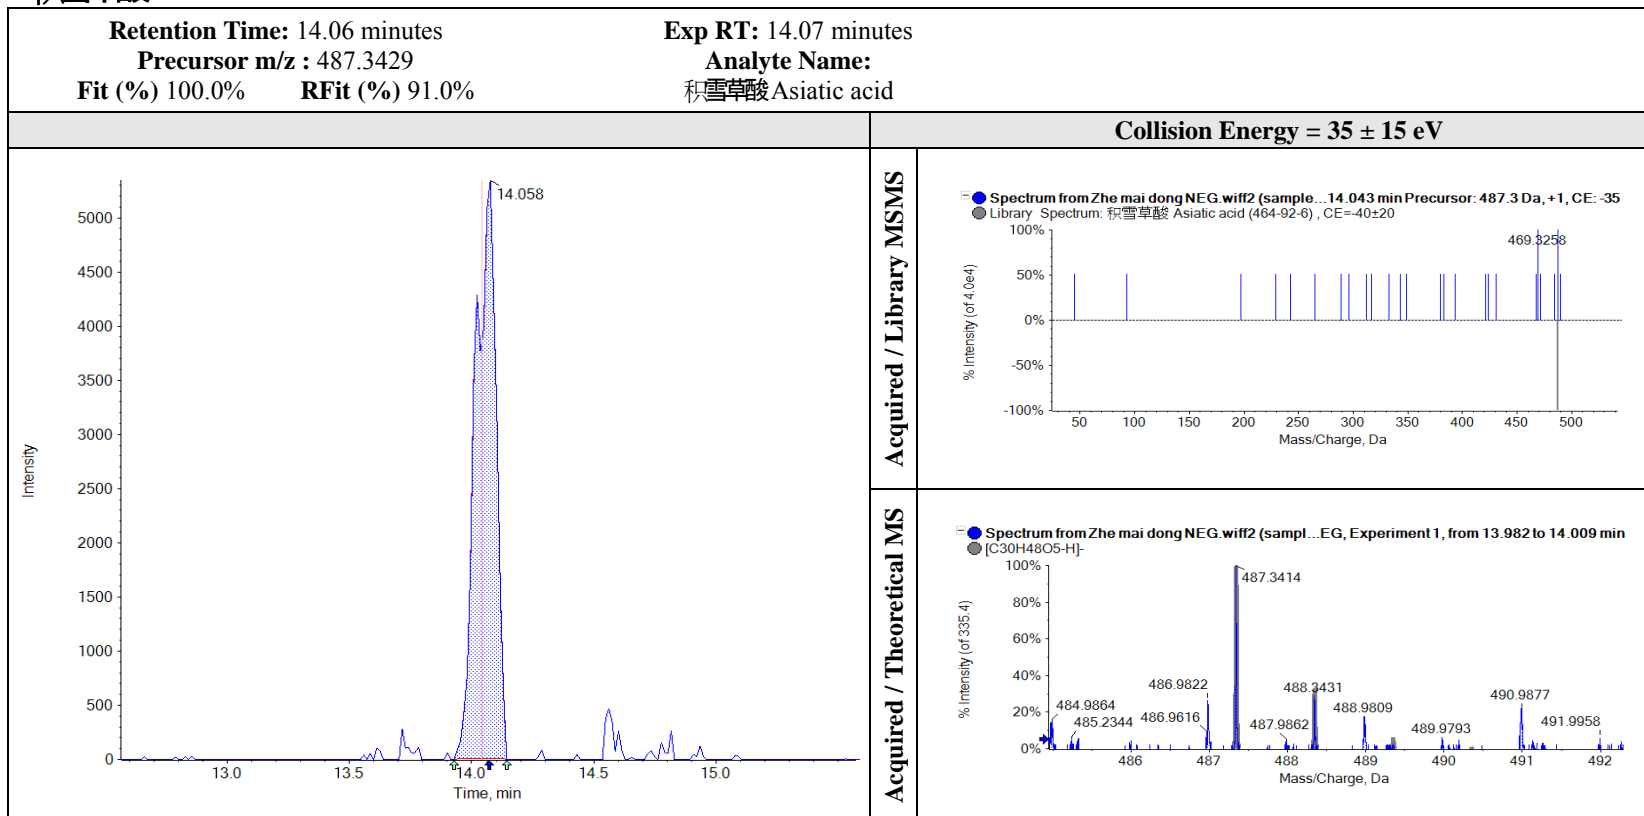

**甲基麦冬高异黄酮A Methylophiopogonone A**

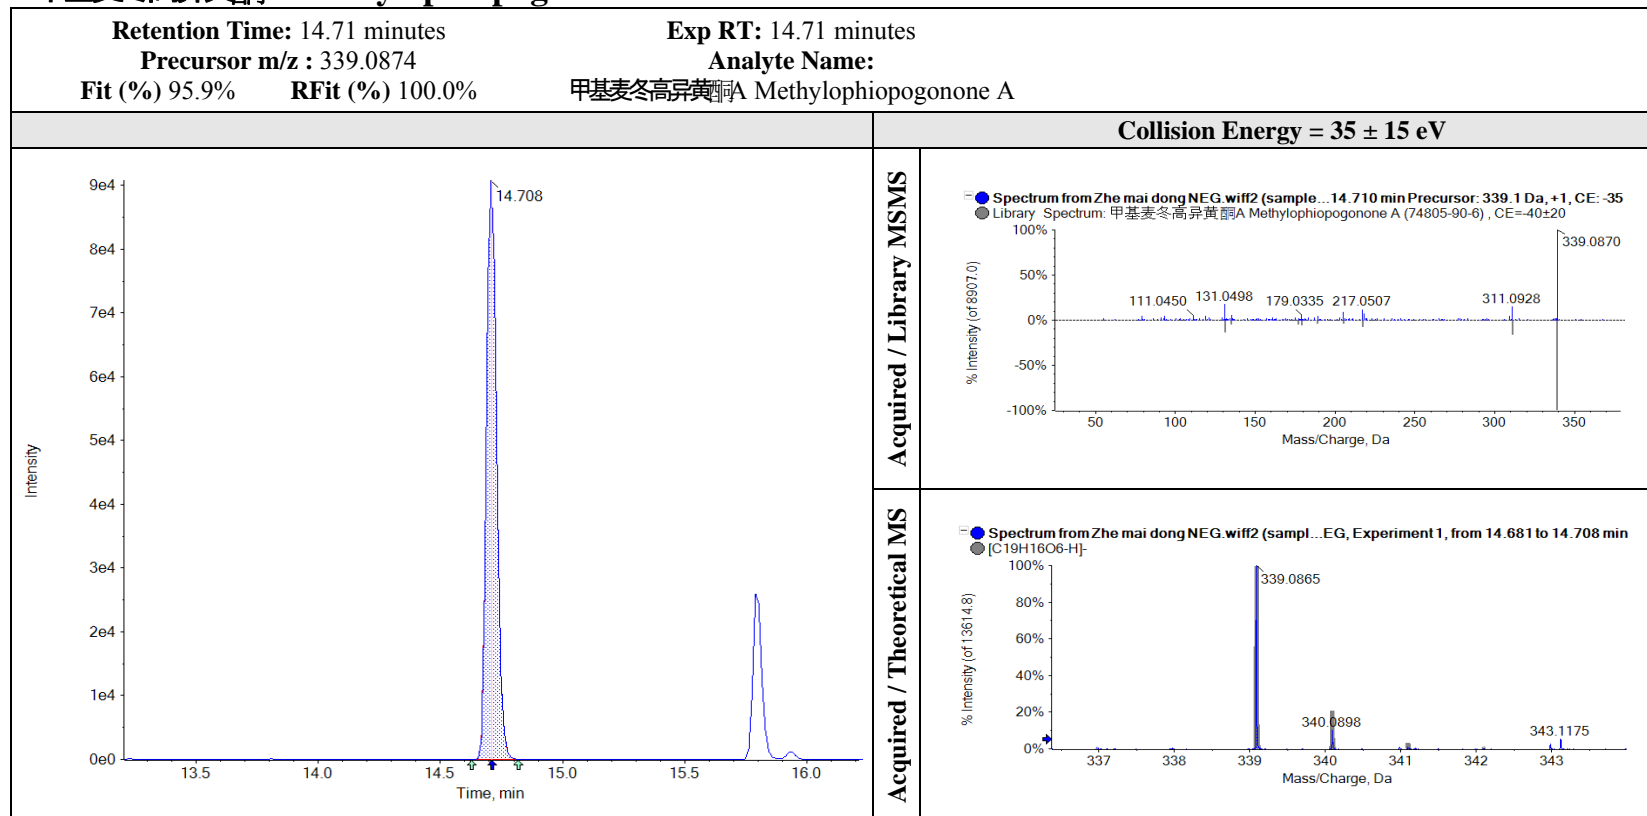

**麦冬皂苷D Ophiopogonin D**

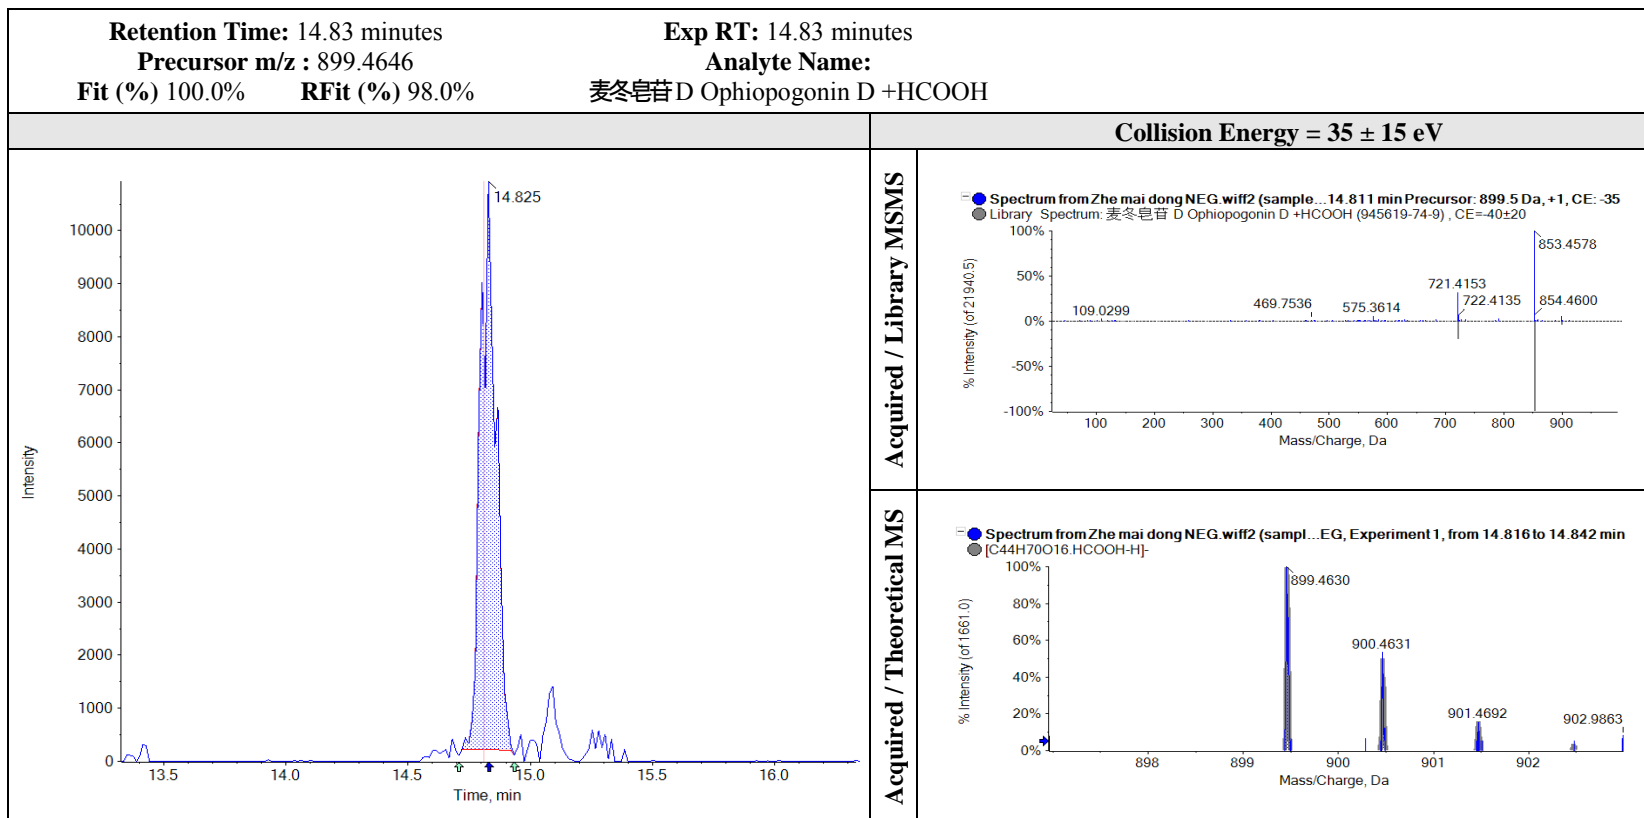

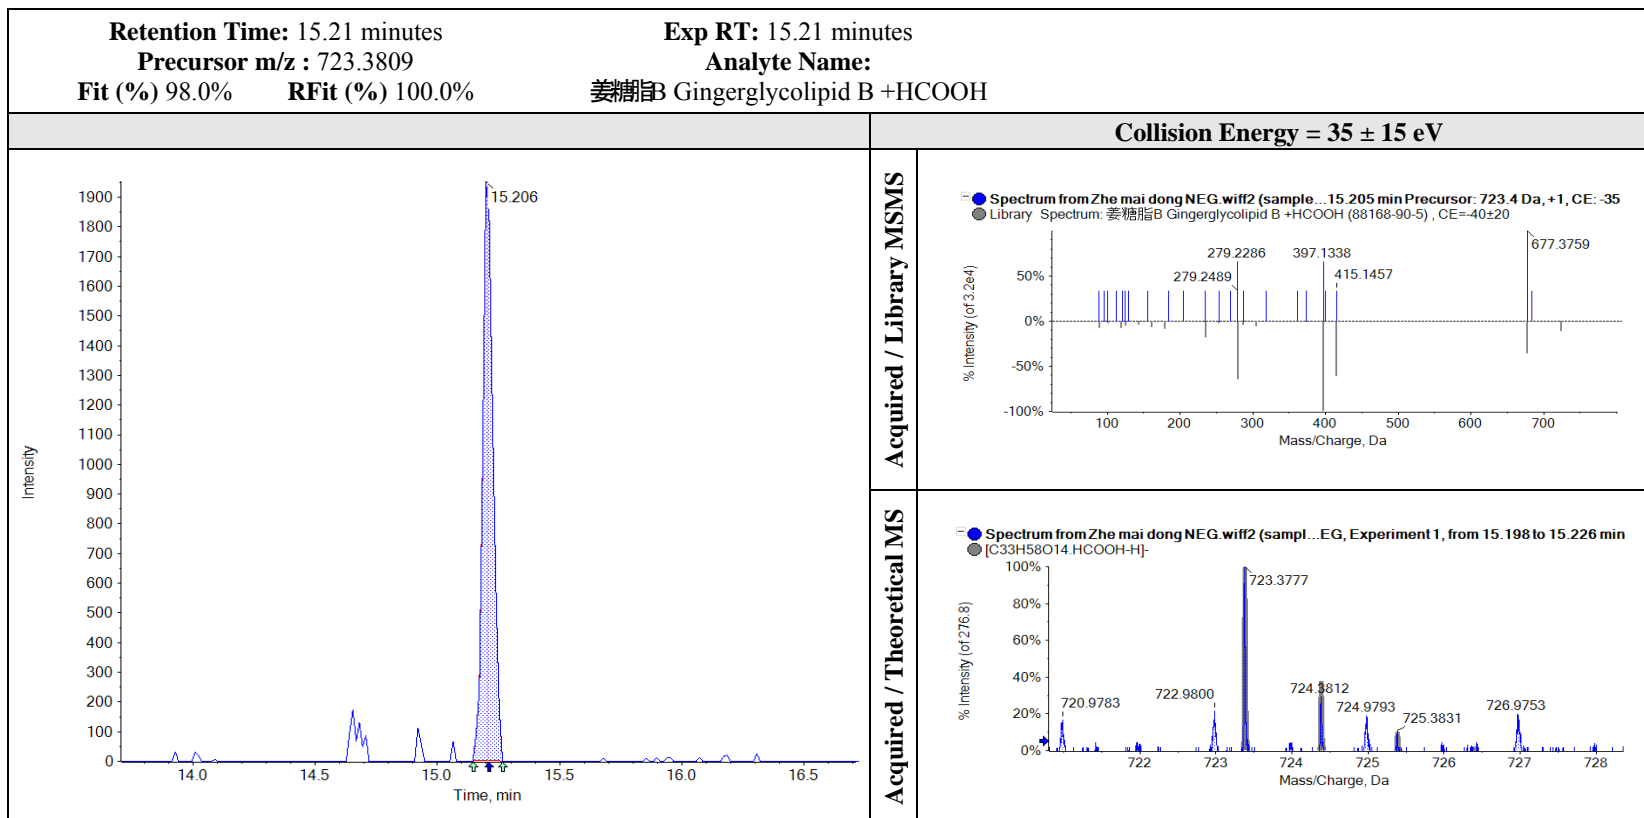

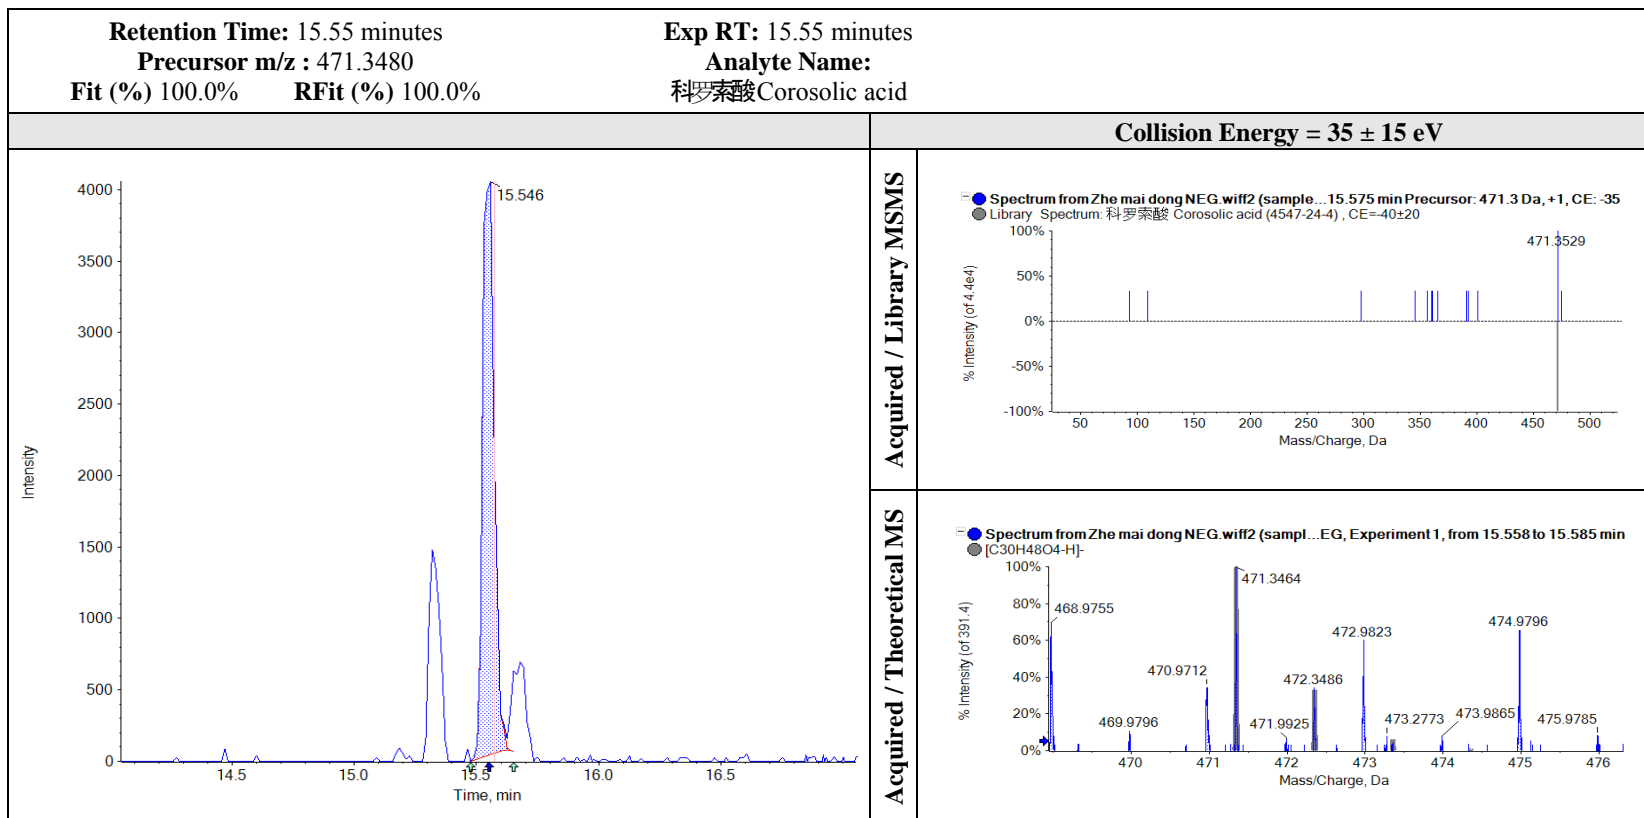

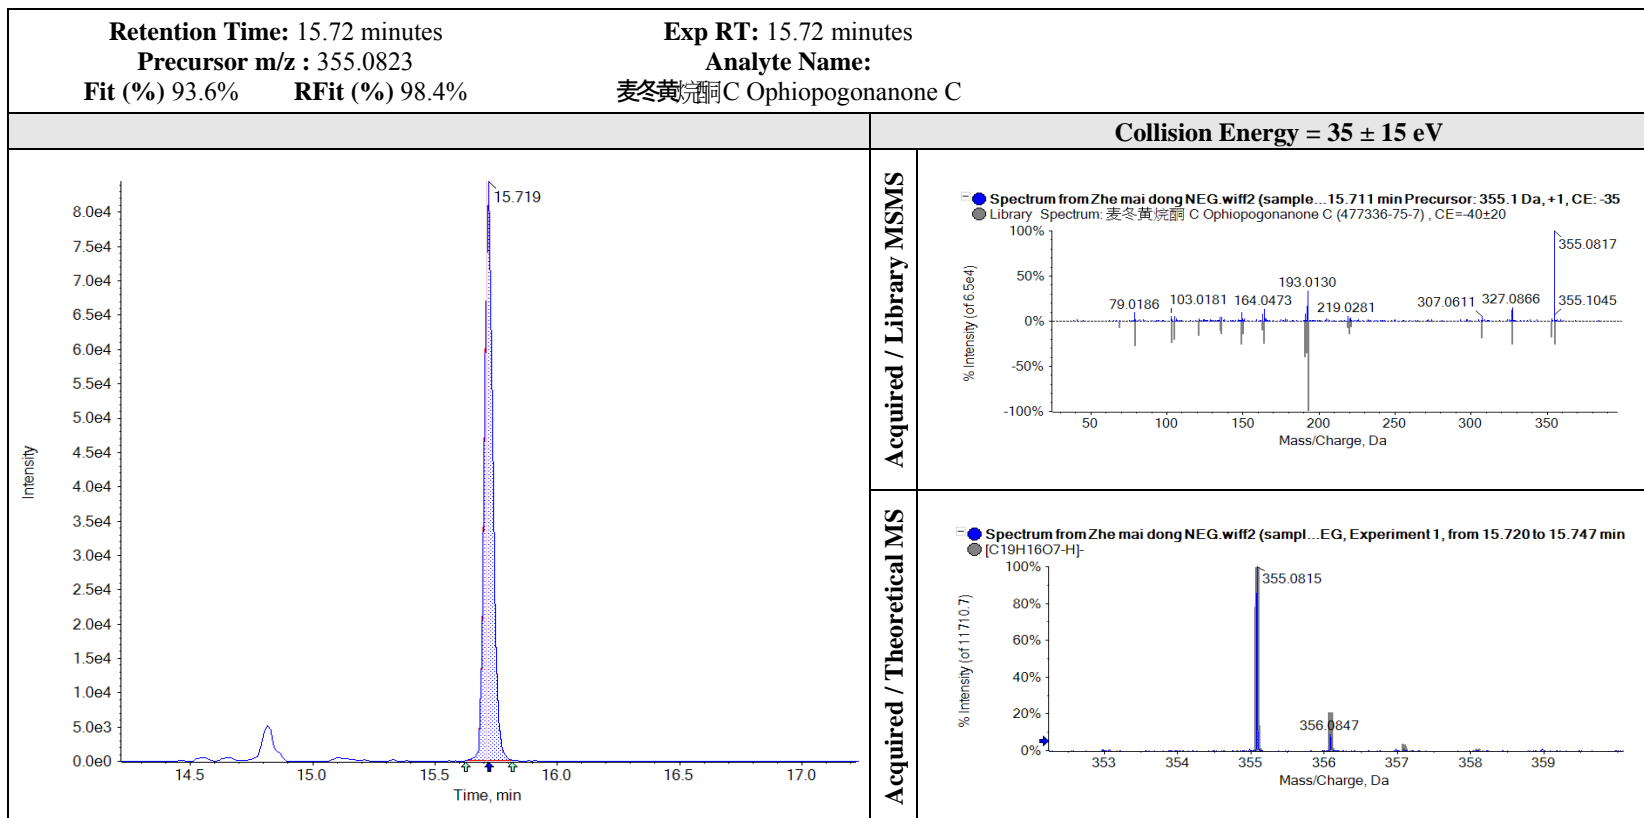

齐墩果酸 Oleanolic acid



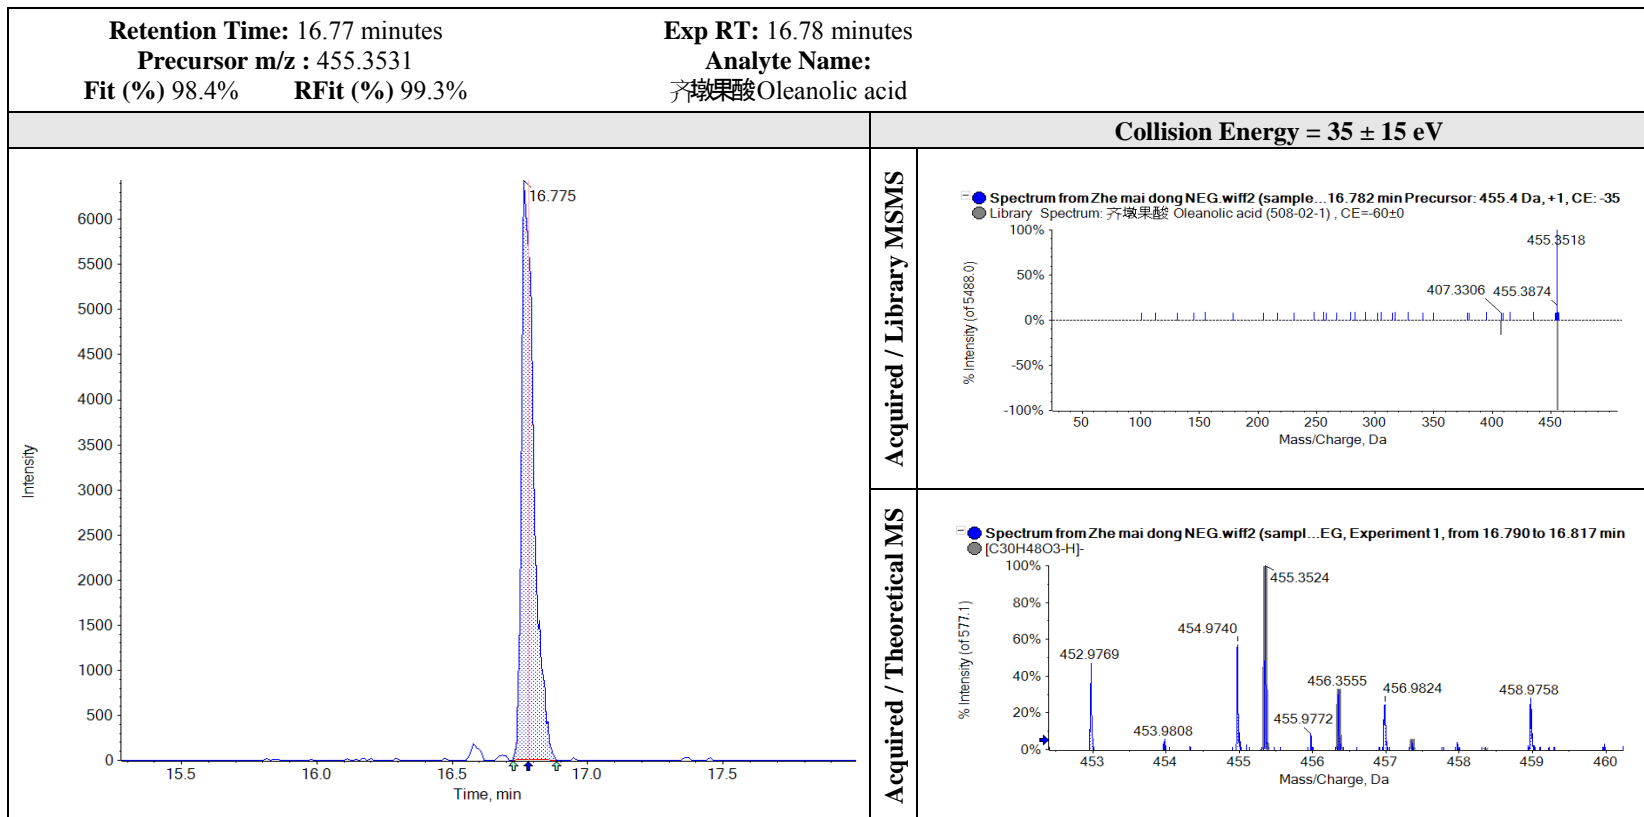

**Table S3 The different chemical constituents between CMD and ZMD in GC-MS analysis**

| NO. | RT(min) | Name                            | Match | VIP  | T-test | Fold change (ZMD/CMD) |
|-----|---------|---------------------------------|-------|------|--------|-----------------------|
| 1   | 16.19   | D-Fructose                      | 928   | 1.34 | 0.031  | 0.87                  |
| 2   | 8.80    | glycerol                        | 922   | 1.92 | 0.000  | 1.22                  |
| 3   | 11.69   | Malic acid                      | 910   | 1.32 | 0.034  | -1.20                 |
| 4   | 26.80   | Sucrose                         | 907   | 1.63 | 0.004  | -1.06                 |
| 5   | 9.25    | Glycine                         | 894   | 1.94 | 0.000  | -9.42                 |
| 6   | 9.13    | L-Proline                       | 888   | 1.76 | 0.001  | -8.10                 |
| 7   | 8.67    | Monoethanolamine                | 882   | 1.82 | 0.001  | -7.41                 |
| 8   | 8.82    | Phosphoric acid                 | 873   | 1.43 | 0.019  | 0.51                  |
| 9   | 18.86   | Inositol                        | 864   | 1.80 | 0.001  | -2.41                 |
| 10  | 16.40   | d-Glucose                       | 857   | 1.46 | 0.016  | 0.86                  |
| 11  | 16.34   | d-Galactose                     | 852   | 1.31 | 0.037  | 0.54                  |
| 12  | 10.01   | Serine                          | 827   | 1.35 | 0.029  | -7.38                 |
| 13  | 12.35   | Threonate                       | 814   | 1.50 | 0.012  | -2.79                 |
| 14  | 12.21   | 4-Aminobutanoic acid            | 798   | 1.68 | 0.003  | -10.95                |
| 15  | 16.28   | D-Mannoheptulose                | 755   | 1.57 | 0.007  | -0.57                 |
| 16  | 20.03   | 2-(beta-D-Glucosyl)-sn-glycerol | 736   | 1.57 | 0.007  | -2.88                 |
| 17  | 26.78   | Trehalose                       | 714   | 1.34 | 0.031  | -0.69                 |

**Table S4 The significantly different chemical constituents between CMD and ZMD (ESI+)**

| NO. | RT (min) | Name                         | molecular weight | VIP  | T-test | Fold change (ZMD/CMD) |
|-----|----------|------------------------------|------------------|------|--------|-----------------------|
| 1   | 12.90    | Thymidine                    | 242.0903         | 1.44 | 0.002  | -1.32                 |
| 2   | 11.13    | Chlorogenic Acid             | 354.0951         | 1.20 | 0.019  | 5.38                  |
| 3   | 8.35     | Indole-3-carboxylic acid     | 161.0477         | 1.45 | 0.002  | 2.39                  |
| 4   | 6.79     | Pyridoxal Phosphate          | 247.0246         | 1.24 | 0.014  | 1.18                  |
| 5   | 9.74     | LysoPC(18:2(9Z,12Z))         | 519.3325         | 1.21 | 0.018  | 6.69                  |
| 6   | 8.90     | Traumatic Acid               | 228.1362         | 1.26 | 0.012  | 2.75                  |
| 7   | 8.90     | LPA(0:0/18:0)                | 438.2746         | 1.22 | 0.017  | 1.07                  |
| 8   | 13.75    | LysoPC(22:2(13Z,16Z))        | 575.3951         | 1.54 | 0.001  | 2.60                  |
| 9   | 1.91     | L-Cysteine                   | 121.0197         | 1.59 | 0.000  | -3.09                 |
| 10  | 0.96     | alpha-Tocopherol             | 430.3811         | 1.69 | 0.000  | -2.96                 |
| 11  | 9.85     | LysoPE (0:0/18:3(6Z,9Z,12Z)) | 475.2699         | 1.05 | 0.048  | -0.88                 |
| 12  | 1.23     | 5-Hydroxyisourate            | 184.0233         | 1.47 | 0.001  | -1.82                 |
| 13  | 15.00    | MG(0:0/22:1(13Z)/0:0)        | 412.3553         | 1.31 | 0.008  | -0.73                 |
| 14  | 12.69    | Dihydroquercetin             | 304.0583         | 1.18 | 0.022  | -0.71                 |
| 15  | 8.34     | Cytidine                     | 243.0855         | 1.41 | 0.003  | 2.80                  |
| 16  | 12.16    | Glutinosone                  | 220.1463         | 1.20 | 0.019  | -0.93                 |
| 17  | 12.68    | Glutathione                  | 307.0838         | 1.54 | 0.000  | -1.52                 |
| 18  | 9.53     | L-Cystathionine              | 222.0674         | 1.29 | 0.009  | -1.78                 |
| 19  | 18.14    | L-Arginine                   | 174.1117         | 1.14 | 0.028  | -0.36                 |
| 20  | 8.35     | Cadaverine                   | 102.1157         | 1.30 | 0.009  | 3.72                  |
| 21  | 11.13    | Pyridoxine 5-phosphate       | 249.0402         | 1.42 | 0.003  | 3.27                  |
| 22  | 5.19     | Stearoylethanolamide         | 327.3137         | 1.34 | 0.006  | -1.60                 |
| 23  | 1.19     | 6-Gingerol                   | 294.1831         | 1.08 | 0.041  | -1.56                 |
| 24  | 15.09    | Gibberellin A53              | 348.1937         | 1.18 | 0.022  | -1.57                 |
| 25  | 7.58     | Calystegin A3                | 159.0895         | 1.25 | 0.014  | -2.21                 |

**Table S5 The significantly different chemical constituents between CMD and ZMD  
(ESI-)**

| NO. | RT<br>(min) | Name                                            | molecular<br>weight | VIP  | T-test | Fold change<br>(ZMD/CMD) |
|-----|-------------|-------------------------------------------------|---------------------|------|--------|--------------------------|
| 1   | 1.17        | Geranyl diphosphate                             | 314.0684            | 1.09 | 0.049  | -1.34                    |
| 2   | 1.00        | Gibberellin A53                                 | 348.1937            | 1.23 | 0.021  | -1.28                    |
| 3   | 8.68        | Gibberellin A86                                 | 380.1471            | 1.63 | 0.000  | -5.04                    |
| 4   | 4.28        | Glutinosone                                     | 220.1463            | 1.23 | 0.023  | 2.26                     |
| 5   | 18.20       | Isovaleric acid                                 | 102.0681            | 1.21 | 0.024  | -0.58                    |
| 6   | 7.11        | Kynurenic acid                                  | 189.0426            | 1.78 | 0.000  | -2.90                    |
| 7   | 6.05        | LysoPC(18:4(6Z,9Z,12Z,15Z))                     | 515.3012            | 1.42 | 0.005  | -3.41                    |
| 8   | 6.04        | LysoPE(0:0/16:1(9Z))                            | 451.2699            | 1.32 | 0.011  | -3.56                    |
| 9   | 11.60       | LysoPE(0:0/22:0)                                | 537.3794            | 1.09 | 0.049  | 1.80                     |
| 10  | 12.61       | LysoPE(0:0/22:1(13Z))                           | 535.3638            | 1.37 | 0.008  | 1.80                     |
| 11  | 14.05       | PC(14:0/20:0)                                   | 761.5935            | 1.37 | 0.008  | -0.75                    |
| 12  | 10.04       | PC(18:0/P-18:0)                                 | 773.6298            | 1.17 | 0.032  | 1.90                     |
| 13  | 9.43        | PC(20:0/24:0)                                   | 901.7500            | 1.51 | 0.002  | 3.41                     |
| 14  | 14.15       | Pelargonidin<br>3-O-(6-O-malonyl-β-D-glucoside) | 518.1060            | 1.32 | 0.012  | 1.21                     |
| 15  | 4.77        | Pyruvate                                        | 88.0160             | 1.72 | 0.000  | -1.46                    |
| 16  | 10.81       | Quercetin                                       | 302.0427            | 1.13 | 0.040  | -0.99                    |
| 17  | 4.77        | Taurine                                         | 125.0147            | 1.78 | 0.000  | -1.51                    |
